# Supplementary material for: HOTAIR and its surrogate DNA methylation signature indicate carboplatin resistance in ovarian cancer
Source: Genome Med. 2015 Oct 24;7:108. doi: 10.1186/s13073-015-0233-4 (PMC4619324; doi:10.1186/s13073-015-0233-4)
Supplement: Additional file 3: — Normalised beta-value DNAme data matrix that was used to identify the 67 HOTAIR -associated CpGs. This data matrix has dimensions 5000 CpGs (the 5000 most variable positions) by 134 samples; samples are annotated according to whether they are HOTAIR + ve/-ve and type of chemotherapy received. (XLSX 9331 kb) [file 13073_2015_233_MOESM3_ESM.xlsx]

## Sheet: Sheet1
CpGid	HA-POS:Untreated	HA-POS:Untreated	HA-POS:Cisplat	HA-POS:Cisplat	HA-NEG:Cisplat	HA-POS:Cisplat	HA-NEG:Cisplat	HA-POS:Cisplat	HA-POS:Cisplat	HA-POS:Untreated	HA-POS:Cisplat	HA-POS:Cisplat	HA-POS:Untreated	HA-POS:Cisplat	HA-POS:Untreated	HA-NEG:Untreated	HA-POS:Carbo-Mono	HA-NEG:Cisplat	HA-NEG:Cisplat	HA-POS:Untreated	HA-NEG:Cisplat	HA-NEG:Cisplat	HA-POS:Untreated	HA-POS:Cisplat	HA-POS:Cisplat	HA-POS:Cisplat	HA-POS:Cisplat	HA-POS:Carbo-Mono	HA-NEG:Cisplat	HA-POS:Untreated	HA-POS:Untreated	HA-POS:Carbo-Mono	HA-POS:Cisplat	HA-POS:Carbo-Mono	HA-POS:Carbo-Mono	HA-POS:Cisplat	HA-NEG:Cisplat	HA-NEG:Carbo-Mono	HA-POS:Cisplat	HA-POS:Cisplat	HA-NEG:Carbo-Mono	HA-POS:Carbo-Mono	HA-POS:Carbo-Mono	HA-NEG:Cisplat	HA-NEG:Cisplat	HA-POS:Carbo-Mono	HA-POS:Carbo-Mono	HA-POS:Carbo-Mono	HA-POS:Carbo-Mono
cg01683883	0.737936	0.669707	0.832435	0.0539121	0.0522019	0.756976	0.856087	0.060988	0.547202	0.368467	0.0805852	0.0344637	0.139495	0.87127	0.830343	0.0251794	0.877368	0.0485592	0.609322	0.622584	0.0187976	0.877613	0.446091	0.845865	0.598319	0.0171312	0.0384098	0.251155	0.723415	0.896582	0.812933	0.930322	0.691987	0.930228	0.719555	0.087364	0.107095	0.638138	0.0382493	0.914028	0.84854	0.0438932	0.671329	0.829714	0.0187815	0.0520809	0.0156321	0.755539	0.788228
cg09516965	0.0173642	0.622584	0.879395	0.0159172	0.118433	0.862902	0.0312871	0.0304681	0.0482674	0.0154174	0.0371239	0.375346	0.405507	0.885318	0.837573	0.11662	0.962641	0.0295272	0.0142733	0.871868	0.0449007	0.0447003	0.0836755	0.164839	0.0126337	0.0356984	0.019091	0.151833	0.0280095	0.047612	0.031124	0.414231	0.777439	0.0190403	0.502793	0.0203408	0.113817	0.0185842	0.156299	0.947475	0.896171	0.810219	0.103656	0.0151314	0.0698009	0.0429171	0.852072	0.146444	0.850376
cg00929855	0.0139454	0.784457	0.778128	0.477905	0.016061	0.0238656	0.0140443	0.780157	0.0227282	0.0182722	0.83323	0.477286	0.0493951	0.883719	0.0452727	0.15257	0.81941	0.0248582	0.0373117	0.296283	0.0584335	0.0223803	0.702868	0.681291	0.0260119	0.039923	0.857942	0.020293	0.919864	0.622218	0.0300902	0.55397	0.679724	0.912827	0.126034	0.0334852	0.0130869	0.697922	0.0156712	0.93863	0.0220984	0.0576643	0.0319763	0.0224582	0.022499	0.0338152	0.611421	0.0494389	0.0255377
cg14159672	0.410076	0.374727	0.273196	0.814217	0.952608	0.264581	0.423887	0.478013	0.901437	0.487744	0.440809	0.333697	0.0434257	0.971982	0.657349	0.477188	0.367554	0.386934	0.563494	0.162882	0.014398	0.625792	0.920661	0.882953	0.494465	0.382583	0.905002	0.0745524	0.787091	0.867796	0.3309	0.368273	0.657445	0.797393	0.604311	0.345544	0.486594	0.351257	0.508075	0.766831	0.871954	0.117579	0.942138	0.888042	0.307013	0.312531	0.930726	0.907991	0.65617
cg04797323	0.0492571	0.741133	0.0573853	0.24722	0.032894	0.723336	0.832435	0.0421528	0.0745897	0.0466873	0.743902	0.888526	0.6506	0.901479	0.0354601	0.67335	0.864167	0.662345	0.863876	0.464107	0.1613	0.929526	0.491317	0.859978	0.0314928	0.221787	0.0344019	0.106287	0.0844493	0.830152	0.456067	0.250389	0.0145948	0.69412	0.821079	0.04315	0.0804949	0.218323	0.0249314	0.838694	0.927456	0.479343	0.317345	0.776808	0.661548	0.0454515	0.926211	0.0273824	0.780157
cg21475402	0.468492	0.681291	0.103117	0.816175	0.0759345	0.7359	0.0924775	0.0524295	0.450734	0.43137	0.108205	0.388781	0.323034	0.819919	0.740414	0.0421153	0.572708	0.512924	0.115807	0.565053	0.591202	0.0541113	0.734304	0.0768691	0.128084	0.542451	0.0388727	0.235916	0.0768272	0.655661	0.681864	0.830827	0.114087	0.878519	0.298698	0.0564844	0.133317	0.860021	0.0548412	0.0581341	0.902241	0.650223	0.0566112	0.0713696	0.0391167	0.040463	0.0540405	0.784394	0.782636
cg23349790	0.265305	0.768216	0.0552217	0.0396055	0.260747	0.816077	0.135651	0.0360177	0.206637	0.127992	0.169316	0.675606	0.455132	0.787759	0.180853	0.03159	0.873853	0.703783	0.139143	0.767945	0.0549594	0.843083	0.0567108	0.247055	0.0352105	0.0213919	0.13421	0.108174	0.208606	0.876397	0.306733	0.274708	0.79598	0.828721	0.315203	0.0307817	0.0729224	0.0235651	0.166033	0.0403782	0.91262	0.860537	0.786329	0.14263	0.0723654	0.0757998	0.0867401	0.517688	0.868462
cg17525406	0.67938	0.711824	0.27228	0.0998912	0.0523476	0.808361	0.0877112	0.362092	0.0621467	0.667418	0.393933	0.496979	0.373618	0.90574	0.222734	0.0698349	0.87434	0.0322981	0.0805188	0.520968	0.0394431	0.822538	0.0573634	0.06771	0.0310123	0.0355934	0.0256404	0.0494632	0.0590125	0.876437	0.786687	0.0509661	0.726243	0.958584	0.0500362	0.0670615	0.117619	0.0364562	0.045872	0.0643594	0.922367	0.81675	0.319163	0.0424019	0.0664444	0.0605158	0.0542516	0.367245	0.838198
cg10303487	0.364476	0.619967	0.0678433	0.0381979	0.413724	0.54046	0.622303	0.213821	0.152238	0.162882	0.0409266	0.76143	0.314803	0.75249	0.842263	0.681526	0.779919	0.0227866	0.069989	0.550333	0.0995131	0.427188	0.111648	0.575239	0.0143087	0.0135211	0.059084	0.07597	0.599492	0.766112	0.363433	0.479972	0.667418	0.516008	0.567456	0.0688944	0.0747789	0.551917	0.065533	0.786078	0.857142	0.748917	0.212358	0.0213909	0.167795	0.0775833	0.77395	0.565255	0.733139
cg25438963	0.0832632	0.0739046	0.800868	0.151944	0.611714	0.703047	0.0700245	0.0943305	0.0798751	0.0789713	0.0934148	0.0797292	0.175507	0.495538	0.0808218	0.158127	0.542362	0.0926385	0.110119	0.150969	0.119015	0.0730725	0.0990528	0.869072	0.0803068	0.115289	0.102408	0.0734	0.906068	0.579016	0.0651347	0.0888552	0.665174	0.149899	0.12777	0.871606	0.127168	0.119015	0.0550747	0.676566	0.916528	0.094649	0.0723828	0.0861794	0.836868	0.0854361	0.883552	0.104643	0.794752
cg13315147	0.619967	0.314896	0.473152	0.0703552	0.256214	0.648904	0.507965	0.262472	0.644532	0.204871	0.329414	0.214188	0.512227	0.632272	0.731811	0.0304267	0.848089	0.74224	0.0458002	0.707231	0.116121	0.859978	0.197871	0.338318	0.536201	0.521177	0.512122	0.256387	0.666043	0.855486	0.687148	0.122097	0.0680656	0.918055	0.107309	0.105596	0.243005	0.0188046	0.714548	0.857488	0.857896	0.717332	0.746029	0.030165	0.0258985	0.621057	0.687309	0.62184	0.694862
cg04715462	0.967955	0.770778	0.771859	0.684271	0.00162014	0.928717	0.905002	0.853151	0.938909	0.959079	0.855218	0.614294	0.919274	0.94469	0.834231	0.00144131	0.839141	0.977876	0.962641	0.936679	0.804359	0.972316	0.725429	0.912704	0.96909	0.927122	0.964894	0.840039	0.943151	0.933028	0.964519	0.00162014	0.826606	0.84409	0.932231	0.656721	0.00179898	0.939384	0.965837	0.871994	0.786148	0.00162014	0.00162014	0.896252	0.973601	0.956526	0.975071	0.931239	0.877167
cg13912117	0.5697	0.612857	0.0560588	0.0146131	0.897316	0.595322	0.0149815	0.0691998	0.190004	0.234446	0.032717	0.00954522	0.144375	0.849264	0.0160387	0.0150044	0.856382	0.703463	0.0421153	0.62007	0.0109039	0.0137217	0.0188046	0.0204826	0.0140227	0.0246871	0.0244318	0.0371496	0.037726	0.864167	0.712519	0.157809	0.48123	0.928523	0.0502299	0.00903475	0.0312285	0.0227007	0.029198	0.0381241	0.819864	0.719096	0.3618	0.0107852	0.036352	0.0679552	0.0117122	0.358233	0.79312
cg06825142	0.108205	0.0159198	0.0538715	0.0187929	0.755987	0.706282	0.672548	0.722812	0.258215	0.0202696	0.0244113	0.521078	0.215906	0.756907	0.789335	0.0430167	0.795475	0.0222138	0.0495209	0.351167	0.0420489	0.81028	0.0198362	0.668652	0.166718	0.0290732	0.27106	0.238309	0.811626	0.580442	0.235224	0.593531	0.576536	0.874974	0.327007	0.0726649	0.0467078	0.363853	0.735835	0.904754	0.700311	0.323968	0.443456	0.766313	0.129094	0.6243	0.811317	0.190494	0.697599
cg08047457	0.0175962	0.239013	0.0158852	0.0432343	0.245729	0.622125	0.328815	0.0336327	0.167047	0.0486553	0.0179311	0.0839526	0.0465249	0.845865	0.789048	0.0243308	0.809742	0.0866102	0.0480927	0.641811	0.0860091	0.793676	0.0406064	0.0287266	0.0306469	0.0428395	0.4204	0.0407945	0.862736	0.629747	0.74048	0.889566	0.256567	0.010762	0.177829	0.0869599	0.0150517	0.912827	0.0120228	0.845022	0.682608	0.611421	0.0124679	0.0250064	0.0290866	0.0318175	0.905247	0.65709	0.0153635
cg12300353	0.014847	0.157101	0.0302612	0.00859643	0.0225942	0.695594	0.0211857	0.0265686	0.0373266	0.174089	0.0131123	0.56432	0.132618	0.77395	0.748989	0.743838	0.838559	0.0385637	0.037473	0.500486	0.092235	0.869707	0.232011	0.0149655	0.57675	0.0136363	0.0350544	0.0357391	0.0160774	0.122876	0.0823159	0.266534	0.374126	0.84254	0.08514	0.0141032	0.0230475	0.147141	0.0256686	0.03397	0.851942	0.081392	0.022247	0.0914007	0.0214834	0.0212718	0.00919065	0.0178586	0.58392
cg22815110	0.0436379	0.441341	0.796037	0.0547775	0.319735	0.716211	0.687309	0.337133	0.554596	0.142168	0.497711	0.349467	0.106014	0.299973	0.586697	0.757661	0.215977	0.704326	0.471811	0.495432	0.186733	0.834179	0.571744	0.834334	0.0527589	0.0639387	0.644532	0.127629	0.709844	0.805993	0.318351	0.503207	0.0378871	0.881862	0.647345	0.319163	0.0404173	0.313249	0.260281	0.667418	0.196849	0.710449	0.333212	0.71067	0.916628	0.70531	0.0282281	0.255159	0.807935
cg16787600	0.21849	0.804643	0.0763998	0.164017	0.141019	0.74524	0.191725	0.10015	0.0695825	0.493231	0.433946	0.177829	0.132009	0.907653	0.125501	0.0822314	0.873656	0.117823	0.425139	0.669884	0.0967078	0.878598	0.0773025	0.190494	0.136396	0.154615	0.114635	0.0763593	0.11914	0.530074	0.449669	0.109048	0.787281	0.833185	0.0732561	0.0569111	0.179394	0.0724354	0.110318	0.164202	0.887272	0.809633	0.653765	0.0692981	0.0674565	0.165165	0.0656346	0.42534	0.847696
cg13099330	0.158611	0.667079	0.151619	0.0574409	0.17685	0.717332	0.169512	0.377874	0.158724	0.383738	0.0806058	0.0438682	0.111359	0.396296	0.487331	0.0495935	0.810115	0.0847007	0.114954	0.249414	0.0796712	0.108705	0.108846	0.387856	0.651595	0.063246	0.135165	0.571826	0.808098	0.116534	0.69872	0.189213	0.151566	0.773329	0.704408	0.396713	0.295523	0.0716888	0.119665	0.45124	0.823816	0.43632	0.0646182	0.15697	0.679987	0.864042	0.0374239	0.604582	0.0680828
cg07054641	0.54982	0.715134	0.805768	0.108174	0.486925	0.69864	0.46504	0.135551	0.186659	0.571348	0.118474	0.598926	0.15218	0.9057	0.870531	0.654488	0.83201	0.11221	0.187096	0.453372	0.433845	0.0773215	0.214576	0.785287	0.186597	0.224904	0.0840196	0.289633	0.192774	0.835607	0.648904	0.0621871	0.710133	0.88861	0.276559	0.46207	0.200498	0.0487283	0.137303	0.901677	0.901896	0.288014	0.540561	0.690454	0.201534	0.227002	0.16958	0.728699	0.765292
cg21577049	0.300536	0.659454	0.0515741	0.511825	0.0200191	0.496407	0.708796	0.0332082	0.0196353	0.0762237	0.544364	0.465535	0.278418	0.875461	0.827988	0.0259535	0.805301	0.810851	0.0252782	0.253247	0.0484609	0.178053	0.0219656	0.764527	0.0222239	0.031995	0.0286785	0.0304159	0.481008	0.87915	0.0146697	0.0737232	0.510648	0.888003	0.278911	0.0127197	0.0184333	0.939092	0.0182656	0.462681	0.571915	0.014075	0.725864	0.694194	0.015717	0.568467	0.528608	0.221058	0.716535
cg03544320	0.861756	0.173354	0.0569111	0.0631819	0.285594	0.0569991	0.0700767	0.454942	0.462787	0.646823	0.208224	0.30757	0.507863	0.0216061	0.787025	0.097693	0.894122	0.340122	0.275449	0.690914	0.205357	0.0542101	0.223061	0.45114	0.0177612	0.197378	0.548612	0.326791	0.155343	0.476245	0.791684	0.0174122	0.0220759	0.698866	0.280845	0.0969527	0.326209	0.0259385	0.503104	0.113234	0.0118649	0.811317	0.609721	0.322188	0.015134	0.645653	0.0285388	0.763143	0.283533
cg27188703	0.0831238	0.717487	0.765155	0.229295	0.0862985	0.739448	0.737015	0.504001	0.309486	0.0711003	0.769802	0.363233	0.465535	0.920826	0.789792	0.353965	0.867674	0.0717729	0.400638	0.389201	0.101197	0.925582	0.139899	0.856802	0.95046	0.173631	0.881365	0.0504481	0.914813	0.867265	0.560517	0.48628	0.728203	0.968649	0.800037	0.901853	0.305965	0.223919	0.158666	0.83281	0.94684	0.464009	0.728982	0.835139	0.462877	0.777747	0.91529	0.385481	0.799585
cg01295203	0.139899	0.413401	0.113481	0.0406657	0.037948	0.608366	0.319637	0.0415358	0.401819	0.249143	0.0429055	0.682437	0.0898341	0.886898	0.854487	0.419449	0.790069	0.0446472	0.057485	0.538668	0.22473	0.730798	0.283438	0.0676489	0.0178193	0.179858	0.059803	0.0617098	0.143375	0.127818	0.557117	0.559014	0.247971	0.147523	0.139584	0.0172537	0.074569	0.217177	0.0230882	0.822022	0.863203	0.641284	0.238222	0.151129	0.632932	0.0372609	0.799613	0.0439062	0.589992
cg27090216	0.481439	0.555615	0.252823	0.0211785	0.0207352	0.325606	0.902788	0.0847504	0.0145065	0.0948526	0.0384556	0.31885	0.49343	0.016824	0.0312793	0.0139843	0.0903716	0.0577296	0.0449269	0.21051	0.220333	0.926979	0.030569	0.0736306	0.0323502	0.460231	0.0509275	0.0271012	0.0906156	0.581755	0.507556	0.0554561	0.0420789	0.0237465	0.0685401	0.0296667	0.0282774	0.597636	0.0309682	0.920591	0.0275467	0.0905355	0.188816	0.050123	0.100238	0.0342833	0.939781	0.753848	0.670305
cg19456540	0.414422	0.697034	0.755075	0.0294116	0.505221	0.563807	0.489916	0.0634342	0.193912	0.112628	0.189875	0.788814	0.137247	0.660363	0.801424	0.882702	0.862819	0.0140151	0.0409098	0.361587	0.101416	0.863111	0.352618	0.630412	0.0207085	0.0777785	0.0192011	0.0489211	0.431897	0.454727	0.151566	0.813811	0.192774	0.919955	0.582264	0.0145028	0.0276053	0.597157	0.048613	0.7942	0.855173	0.674741	0.113584	0.157991	0.0416702	0.51446	0.512736	0.434385	0.721616
cg10784813	0.655022	0.359257	0.914248	0.217912	0.92834	0.868545	0.862656	0.400638	0.75846	0.230974	0.183751	0.625138	0.214188	0.634041	0.299067	0.452971	0.39104	0.120574	0.53476	0.379222	0.557996	0.951966	0.416673	0.785637	0.308066	0.394044	0.913685	0.361884	0.28682	0.886529	0.564749	0.932646	0.469949	0.81534	0.809096	0.331285	0.537929	0.919459	0.49022	0.858124	0.126335	0.663575	0.327007	0.850334	0.311188	0.362506	0.183048	0.285874	0.115565
cg01805540	0.0323341	0.634489	0.0223776	0.0109331	0.0179653	0.723563	0.107615	0.0395022	0.0553428	0.284439	0.153071	0.0220188	0.207267	0.0181534	0.861277	0.0248296	0.597809	0.0162065	0.0335581	0.660914	0.0312026	0.82437	0.0173551	0.0191939	0.0259327	0.00935062	0.0148904	0.0550747	0.0344999	0.0676771	0.662607	0.233581	0.0145969	0.872114	0.0990222	0.0130001	0.0346	0.00725443	0.0295725	0.0586751	0.718882	0.704022	0.674578	0.0166113	0.0116254	0.0437181	0.020578	0.771602	0.767685
cg15679651	0.601527	0.682692	0.168418	0.244539	0.450734	0.324244	0.613631	0.350868	0.0671296	0.199057	0.0467942	0.871318	0.628928	0.841437	0.91032	0.0216386	0.762233	0.528705	0.118104	0.57553	0.309866	0.872946	0.483548	0.189875	0.211427	0.627232	0.440496	0.188318	0.578834	0.144321	0.259374	0.191952	0.276097	0.893644	0.720702	0.0738474	0.112364	0.390158	0.0719621	0.104119	0.175221	0.704742	0.339822	0.246518	0.205282	0.111109	0.922841	0.864248	0.246606
cg06274159	0.115251	0.791162	0.0592751	0.0583164	0.0739616	0.674183	0.102848	0.0623318	0.0686364	0.148923	0.738946	0.932924	0.160118	0.885733	0.874974	0.335118	0.916859	0.0659882	0.0612137	0.38538	0.117981	0.818351	0.401819	0.0309836	0.0444506	0.0669203	0.118353	0.130649	0.102812	0.93077	0.264401	0.584724	0.684534	0.60219	0.288399	0.0418015	0.0985667	0.220333	0.053586	0.0589287	0.727901	0.406418	0.721078	0.0908013	0.197686	0.41524	0.867265	0.159884	0.862615
cg18952647	0.53124	0.402208	0.574437	0.124311	0.74048	0.690991	0.312531	0.100057	0.0993971	0.1362	0.0588183	0.7182	0.0369316	0.817191	0.850775	0.0572512	0.711441	0.0325676	0.0724165	0.443456	0.0780498	0.132054	0.0512037	0.627135	0.0573426	0.0323061	0.257353	0.0596075	0.219851	0.546388	0.597443	0.71917	0.395764	0.173074	0.828916	0.48061	0.0360638	0.173282	0.0213882	0.824665	0.842122	0.606789	0.459916	0.0838624	0.542876	0.403664	0.276846	0.683509	0.693526
cg00186701	0.223159	0.792891	0.686073	0.892494	0.169053	0.162882	0.732838	0.450937	0.221549	0.197069	0.627526	0.520473	0.60533	0.856597	0.868054	0.0948251	0.790985	0.852187	0.289718	0.580637	0.708331	0.741133	0.80042	0.84476	0.110159	0.482385	0.231208	0.529657	0.721378	0.838473	0.146325	0.483446	0.656457	0.874556	0.546811	0.339425	0.27946	0.941482	0.0842779	0.88825	0.931449	0.402436	0.279819	0.121808	0.53691	0.490018	0.393234	0.128225	0.738798
cg06722633	0.237632	0.715276	0.617553	0.0304444	0.0519298	0.734749	0.137247	0.0334605	0.0508933	0.0419444	0.118566	0.22859	0.12491	0.880589	0.681781	0.0218221	0.859424	0.041784	0.0327642	0.615447	0.0801116	0.769366	0.143725	0.281747	0.28954	0.0604642	0.0525993	0.0871097	0.217177	0.798446	0.291386	0.096677	0.632932	0.917255	0.056231	0.0473098	0.0505951	0.0260358	0.0292128	0.0458586	0.789965	0.71895	0.490308	0.0223046	0.0221413	0.0237643	0.0205039	0.195486	0.755662
cg01561916	0.0262104	0.036807	0.782507	0.499046	0.49022	0.701365	0.810115	0.032501	0.043804	0.0251794	0.0207229	0.597341	0.0697667	0.752561	0.620743	0.0128492	0.837621	0.0233486	0.0206989	0.509626	0.052788	0.8585	0.272369	0.809042	0.0219177	0.118228	0.310265	0.0898063	0.725136	0.794812	0.0401231	0.746586	0.317256	0.251933	0.57553	0.0282281	0.0242935	0.101066	0.032061	0.7966	0.166156	0.0343103	0.357747	0.540063	0.714251	0.0866102	0.687985	0.0273509	0.01479
cg22396755	0.0342346	0.12693	0.260845	0.442099	0.78173	0.0151801	0.21929	0.214803	0.237115	0.0355558	0.0640608	0.0719621	0.336108	0.882026	0.0216933	0.0314256	0.462489	0.0389905	0.064939	0.428443	0.247636	0.808302	0.275075	0.709034	0.399376	0.0383425	0.192848	0.0696813	0.84658	0.832435	0.0297243	0.902286	0.139395	0.0185866	0.481439	0.342243	0.181421	0.0171058	0.143676	0.846086	0.0479894	0.0310123	0.26785	0.305876	0.0336943	0.0741526	0.185818	0.0193711	0.121499
cg25574024	0.032894	0.675854	0.109115	0.0410145	0.0936082	0.858541	0.077361	0.11475	0.798725	0.0699401	0.201534	0.193421	0.455868	0.0245406	0.880268	0.0141238	0.920826	0.9002	0.0774809	0.63164	0.0620318	0.0197748	0.399376	0.851729	0.153814	0.0362094	0.0920177	0.222296	0.702075	0.885733	0.262281	0.403976	0.585506	0.919005	0.159625	0.0619752	0.170937	0.0156413	0.0774406	0.211743	0.803127	0.758321	0.692809	0.0524973	0.0438682	0.102049	0.0481631	0.191513	0.851251
cg25720804	0.752063	0.0397423	0.611523	0.289251	0.543173	0.498651	0.506244	0.105837	0.0998254	0.480907	0.0699721	0.71613	0.525895	0.715512	0.57251	0.0284163	0.0335282	0.0267114	0.0695825	0.722145	0.12443	0.864083	0.0608986	0.0809301	0.0317336	0.138677	0.180717	0.183395	0.715276	0.79121	0.727096	0.0655948	0.0712512	0.0351736	0.180198	0.027335	0.09164	0.382882	0.0275583	0.785051	0.752128	0.714691	0.0686683	0.0589287	0.505829	0.197777	0.032919	0.322188	0.721157
cg12164282	0.241919	0.785462	0.0310198	0.0253656	0.111396	0.818351	0.0356028	0.0759345	0.178848	0.693784	0.0656602	0.0279902	0.291099	0.0317146	0.0423335	0.0255751	0.889897	0.0230776	0.240199	0.169846	0.118566	0.0313441	0.203364	0.642071	0.0363804	0.025459	0.162381	0.1343	0.267066	0.895148	0.79266	0.0971033	0.783122	0.0385637	0.29744	0.045012	0.410692	0.0468557	0.080172	0.06066	0.0301501	0.819553	0.644987	0.0290524	0.143076	0.0938441	0.058365	0.517067	0.772122
cg12508624	0.545669	0.402526	0.733289	0.0396677	0.697756	0.0821523	0.0107247	0.0545785	0.648993	0.028545	0.873111	0.0274748	0.0244584	0.190289	0.0343409	0.0092676	0.744049	0.824803	0.620957	0.310265	0.0649248	0.676471	0.0404115	0.162882	0.794368	0.0179803	0.0210175	0.0364988	0.620957	0.674908	0.333518	0.0721811	0.117943	0.83323	0.235916	0.0147677	0.184018	0.0260903	0.0173982	0.867754	0.0457339	0.603492	0.475829	0.225246	0.0255091	0.0378451	0.857276	0.123051	0.528923
cg04330449	0.140102	0.037296	0.791449	0.142221	0.380391	0.044818	0.127818	0.134399	0.278811	0.0489613	0.405289	0.546487	0.257353	0.0456215	0.232855	0.0347263	0.827516	0.0230451	0.53124	0.606789	0.220572	0.356143	0.0662377	0.0785441	0.0312026	0.0710499	0.144788	0.110159	0.457153	0.518764	0.722302	0.603692	0.0450812	0.311488	0.853402	0.0431627	0.125136	0.0496186	0.128865	0.777876	0.763143	0.222564	0.635884	0.0804949	0.53165	0.0712185	0.714173	0.421824	0.549414
cg09467501	0.156234	0.187235	0.65322	0.632361	0.755727	0.0656265	0.098748	0.159257	0.197777	0.0689101	0.799585	0.525803	0.12279	0.735233	0.0530333	0.173413	0.626928	0.0336286	0.70039	0.316472	0.0944984	0.738093	0.120402	0.301713	0.127531	0.0973403	0.0744117	0.122097	0.174755	0.773896	0.0880203	0.654846	0.0808648	0.833364	0.132203	0.771093	0.20625	0.636167	0.236867	0.666043	0.855218	0.152238	0.0851151	0.723867	0.190778	0.0773215	0.88121	0.196104	0.649857
cg22740835	0.0835109	0.676285	0.155042	0.137705	0.212358	0.845288	0.144965	0.743551	0.252105	0.444095	0.370743	0.120278	0.0747789	0.832193	0.731371	0.0307777	0.726173	0.0841585	0.674345	0.538043	0.138786	0.0995756	0.404485	0.587369	0.748366	0.0719621	0.128182	0.26794	0.664805	0.810389	0.309387	0.502793	0.785637	0.465337	0.477905	0.567243	0.648716	0.0851641	0.136003	0.640027	0.852187	0.380189	0.317435	0.101512	0.465143	0.261932	0.687226	0.625505	0.0524888
cg11882252	0.0342028	0.0303572	0.489716	0.549312	0.80475	0.263277	0.380492	0.540877	0.047844	0.034548	0.0544697	0.195347	0.034791	0.640564	0.249234	0.679555	0.0569427	0.506626	0.514153	0.0819049	0.108002	0.0594047	0.226752	0.0478217	0.033583	0.0383168	0.711665	0.056176	0.412898	0.059683	0.0270184	0.0673294	0.0275082	0.0434257	0.238052	0.480907	0.0524678	0.0417893	0.0314256	0.7798	0.0328585	0.0362002	0.118566	0.0415358	0.367022	0.0264146	0.33873	0.437585	0.0413748
cg20831708	0.340212	0.274708	0.325606	0.234195	0.407455	0.732915	0.198537	0.0753813	0.736561	0.226835	0.652859	0.0287266	0.265643	0.128815	0.619288	0.287211	0.279819	0.364707	0.193998	0.533854	0.197155	0.949394	0.31264	0.401819	0.0635871	0.169177	0.296021	0.531341	0.262735	0.044908	0.557419	0.223919	0.198696	0.0573952	0.251582	0.229706	0.477704	0.0410955	0.428762	0.372396	0.0368021	0.540063	0.173074	0.910078	0.320316	0.319555	0.015865	0.255053	0.104473
cg04032226	0.0908536	0.577367	0.618974	0.66215	0.71114	0.605711	0.640663	0.190418	0.248777	0.0871097	0.845066	0.679638	0.62798	0.70817	0.0718427	0.259189	0.774526	0.217414	0.728203	0.567349	0.628443	0.764661	0.275356	0.177829	0.669442	0.208776	0.129554	0.156119	0.148188	0.70531	0.053744	0.862531	0.568836	0.807935	0.227314	0.763527	0.724706	0.567769	0.411218	0.863876	0.806265	0.0763417	0.837959	0.764005	0.785764	0.808567	0.750021	0.268224	0.671329
cg17965019	0.0402972	0.0381143	0.711516	0.144046	0.756771	0.54387	0.276846	0.774397	0.0637867	0.0465901	0.0493438	0.432831	0.159625	0.816977	0.412483	0.0356557	0.480295	0.70635	0.610852	0.50481	0.0565283	0.0945273	0.0409098	0.798907	0.0445055	0.048761	0.699561	0.0574193	0.585414	0.439983	0.386391	0.359362	0.473387	0.0357818	0.0800448	0.631994	0.0602914	0.574529	0.044595	0.873697	0.0349312	0.474024	0.0310198	0.0393673	0.12189	0.805032	0.785955	0.0535954	0.0493611
cg21359747	0.360691	0.745771	0.715062	0.242835	0.778066	0.700552	0.711824	0.864469	0.507556	0.0909402	0.827938	0.801316	0.0489935	0.861277	0.848364	0.919224	0.819864	0.692232	0.720332	0.413932	0.542451	0.907516	0.64836	0.829913	0.91416	0.130114	0.757724	0.0907196	0.890727	0.891453	0.0661329	0.87191	0.582528	0.931509	0.569029	0.877863	0.328909	0.939836	0.880551	0.907051	0.870946	0.598319	0.371358	0.708331	0.779109	0.776541	0.315101	0.0389795	0.755796
cg22881914	0.0254039	0.766112	0.737089	0.0582127	0.114124	0.701681	0.527395	0.606975	0.621457	0.478013	0.0562093	0.645267	0.356613	0.01825	0.792834	0.942138	0.85073	0.446943	0.733069	0.0388519	0.344418	0.593429	0.0177822	0.0386982	0.384244	0.127391	0.0903179	0.234362	0.265396	0.642071	0.04116	0.845911	0.72492	0.516323	0.364594	0.0982871	0.0897759	0.0208703	0.0248692	0.841303	0.824902	0.301121	0.0442324	0.0197553	0.76216	0.0258401	0.784936	0.24538	0.0253123
cg18794577	0.0504481	0.682437	0.0422986	0.0504223	0.0670838	0.675255	0.0433227	0.0404917	0.179727	0.0482674	0.562796	0.561474	0.146273	0.368165	0.844665	0.528705	0.845197	0.123231	0.0386146	0.0504942	0.0881711	0.858324	0.0634067	0.0593794	0.0417607	0.030305	0.0833995	0.0821762	0.548612	0.0325164	0.0465532	0.098161	0.674662	0.737241	0.0824496	0.0337076	0.085576	0.0610368	0.0624756	0.0544794	0.94078	0.03526	0.703943	0.0457923	0.106754	0.0218257	0.0634067	0.0635125	0.812571
cg15731815	0.66305	0.156299	0.828536	0.142704	0.0918285	0.432005	0.857231	0.0665189	0.758861	0.657815	0.776735	0.0863457	0.183253	0.850819	0.781841	0.756114	0.854535	0.031786	0.554596	0.627135	0.117743	0.862861	0.601898	0.862085	0.0124107	0.26698	0.641458	0.11041	0.861621	0.872566	0.694363	0.889897	0.467971	0.890227	0.187749	0.0676771	0.79042	0.439133	0.701201	0.876348	0.0394922	0.551917	0.144525	0.795413	0.829063	0.872779	0.084322	0.76861	0.497079
cg10883303	0.0263575	0.0412116	0.579526	0.0785039	0.355368	0.0733817	0.247055	0.0217824	0.485996	0.0439937	0.69864	0.707231	0.584015	0.0303359	0.840701	0.0336536	0.0328184	0.789635	0.0304784	0.0899735	0.224811	0.593318	0.213567	0.0489461	0.0313631	0.103084	0.0503088	0.0900292	0.0641158	0.510648	0.0414333	0.606394	0.0423705	0.916294	0.643619	0.0315935	0.046547	0.0351424	0.105664	0.0300277	0.72835	0.629474	0.0303288	0.242072	0.218719	0.521606	0.0287169	0.0320754	0.0456014
cg26796190	0.0878903	0.130014	0.626153	0.661973	0.690914	0.0377458	0.0588441	0.105394	0.140606	0.035949	0.775031	0.489075	0.0704875	0.677167	0.033274	0.0696988	0.496204	0.019105	0.678084	0.267339	0.0790568	0.669352	0.0909671	0.226587	0.0540917	0.0752318	0.0370219	0.0890096	0.132155	0.770778	0.0606246	0.639542	0.0382338	0.814983	0.101853	0.785164	0.135898	0.597906	0.0770866	0.602857	0.821573	0.0984156	0.025229	0.682021	0.126647	0.0730548	0.816235	0.137247	0.62732
cg13035743	0.57675	0.652317	0.79306	0.193912	0.650782	0.643705	0.0999232	0.391363	0.110334	0.252729	0.81427	0.397089	0.147025	0.837195	0.304737	0.155765	0.388781	0.719402	0.054617	0.374426	0.137807	0.351356	0.274507	0.195045	0.881781	0.0430738	0.550127	0.175893	0.518969	0.709844	0.482608	0.870147	0.335604	0.861756	0.296106	0.216614	0.152901	0.79042	0.0631011	0.826057	0.854826	0.436102	0.349568	0.331	0.10706	0.252729	0.863546	0.583528	0.745501
cg03355526	0.0862786	0.76143	0.0766732	0.0274731	0.179858	0.594023	0.0261962	0.219927	0.191441	0.353129	0.115565	0.407549	0.184361	0.71491	0.839052	0.0259097	0.863746	0.134256	0.0702248	0.579428	0.17724	0.0249339	0.169053	0.706984	0.0173596	0.0381291	0.147363	0.215823	0.164648	0.895852	0.0832393	0.571248	0.674424	0.755075	0.103189	0.0427594	0.130553	0.305026	0.0568231	0.037999	0.834424	0.679555	0.491517	0.0536758	0.0512132	0.0656265	0.0358973	0.737302	0.764966
cg23495733	0.01288	0.061075	0.563704	0.0294846	0.605252	0.0155472	0.490804	0.158054	0.0419755	0.0729224	0.623056	0.0255204	0.0253782	0.00786526	0.598111	0.0163701	0.0141967	0.0155649	0.603492	0.0950742	0.228895	0.436697	0.190645	0.200886	0.014639	0.0901566	0.386934	0.101229	0.0498203	0.0242728	0.0189969	0.480816	0.0277722	0.0412405	0.683103	0.0282444	0.0191254	0.0378301	0.0339653	0.218072	0.0142367	0.0369175	0.0615324	0.124178	0.379655	0.0173321	0.801424	0.0176854	0.00762566
cg20959866	0.589992	0.411931	0.674662	0.167116	0.0828696	0.741859	0.298126	0.0983876	0.210353	0.463911	0.255694	0.75035	0.125079	0.862455	0.798611	0.121808	0.807829	0.305323	0.219927	0.428548	0.306135	0.906371	0.558574	0.174829	0.358233	0.100818	0.0845675	0.0762431	0.15944	0.716371	0.635062	0.633853	0.649767	0.714173	0.300067	0.183112	0.099634	0.0902872	0.0858087	0.13148	0.882543	0.659907	0.456406	0.0592048	0.426472	0.355752	0.222897	0.732106	0.759861
cg00949442	0.136243	0.108484	0.184086	0.0401817	0.50381	0.316683	0.159202	0.320602	0.206174	0.0794979	0.0798118	0.287496	0.178848	0.882991	0.182088	0.0199239	0.0770466	0.0681149	0.232011	0.418687	0.0852396	0.845331	0.0426378	0.0744624	0.0329057	0.0433429	0.086155	0.0789956	0.626839	0.416777	0.050013	0.112879	0.0808218	0.877288	0.0523674	0.0377557	0.0711832	0.129464	0.116289	0.914294	0.900682	0.506347	0.439028	0.82711	0.317542	0.0964957	0.600256	0.0595695	0.718035
cg19246110	0.0291066	0.206104	0.672029	0.0227031	0.0275676	0.350262	0.0352562	0.837153	0.0189876	0.0239669	0.0243064	0.0281606	0.183465	0.879606	0.784758	0.0349183	0.0248782	0.0353203	0.0357167	0.467971	0.0471745	0.49384	0.0239888	0.81006	0.0294377	0.0396276	0.81915	0.0372114	0.0453655	0.753434	0.0275047	0.45618	0.0303329	0.648626	0.0238578	0.0292863	0.0411536	0.167351	0.0403236	0.44071	0.718801	0.588719	0.126034	0.0254534	0.0613537	0.0410145	0.857488	0.0477502	0.502297
cg21238818	0.489821	0.0722745	0.626545	0.0307071	0.787409	0.646823	0.536201	0.192102	0.591894	0.131909	0.746586	0.0690556	0.232343	0.680771	0.764396	0.0266893	0.781841	0.18382	0.664102	0.380714	0.198029	0.60095	0.183321	0.180651	0.447541	0.189875	0.0610008	0.154017	0.811057	0.0140517	0.0960269	0.0864109	0.560023	0.889981	0.554886	0.278811	0.528103	0.095552	0.672891	0.846988	0.037175	0.6553	0.110523	0.617094	0.682851	0.104282	0.203055	0.418906	0.0283627
cg19358442	0.558909	0.110593	0.717574	0.141275	0.632448	0.40662	0.587188	0.0916656	0.753359	0.488587	0.662243	0.887238	0.175646	0.765526	0.779487	0.0336455	0.218564	0.747146	0.371263	0.465245	0.0542947	0.862819	0.754864	0.235224	0.563917	0.509522	0.151022	0.762765	0.0478217	0.0900006	0.171877	0.6569	0.119255	0.0408403	0.779859	0.168485	0.766049	0.881403	0.814776	0.90348	0.728771	0.607116	0.850176	0.624202	0.250988	0.726629	0.875016	0.448246	0.723415
cg05488632	0.106885	0.111684	0.790877	0.236442	0.616899	0.119905	0.617454	0.607981	0.145477	0.145477	0.105363	0.501006	0.374822	0.686495	0.433231	0.0968618	0.797889	0.0570096	0.0828696	0.457542	0.175832	0.839277	0.139789	0.57727	0.0393823	0.145897	0.679277	0.230144	0.720332	0.194567	0.180853	0.720332	0.204013	0.0684933	0.263372	0.0829848	0.222806	0.0582484	0.761953	0.526407	0.0882191	0.127908	0.289633	0.862294	0.228974	0.818402	0.568467	0.183048	0.087364
cg26521404	0.769936	0.768153	0.829663	0.151509	0.506244	0.755075	0.840557	0.757588	0.738946	0.739788	0.894651	0.591894	0.442811	0.843223	0.79587	0.977075	0.870489	0.628928	0.680771	0.721682	0.185243	0.872284	0.308527	0.771408	0.825295	0.0562418	0.86653	0.13286	0.46819	0.837433	0.749137	0.932381	0.660363	0.916859	0.529756	0.0891995	0.616407	0.462681	0.0552023	0.838345	0.914028	0.738723	0.648904	0.668554	0.268314	0.838473	0.905002	0.737712	0.781193
cg09492887	0.138677	0.061862	0.0453588	0.643794	0.738798	0.0784037	0.643705	0.0862985	0.0843459	0.0460221	0.0201699	0.43632	0.234118	0.723867	0.797672	0.087287	0.117501	0.461055	0.318447	0.222478	0.403458	0.598111	0.344926	0.0293953	0.0737416	0.129371	0.0346827	0.10636	0.0497864	0.0339356	0.0414689	0.899694	0.0477739	0.06044	0.497409	0.686826	0.142573	0.634969	0.0251473	0.526207	0.0246026	0.448143	0.039775	0.156659	0.618124	0.0933304	0.0858583	0.087565	0.0819602
cg16761581	0.488178	0.603692	0.0149419	0.00844235	0.648088	0.49252	0.0146978	0.0207881	0.0197928	0.0235466	0.0352431	0.03231	0.126251	0.847414	0.0166459	0.00676319	0.780355	0.0150995	0.0289642	0.303685	0.0292592	0.0159149	0.0745897	0.0377067	0.701437	0.0126578	0.0154782	0.0176012	0.179189	0.00895203	0.212045	0.301615	0.541948	0.750417	0.0859111	0.0202767	0.0139474	0.634041	0.0101082	0.0369857	0.747995	0.0193454	0.108002	0.0119015	0.0097377	0.0134451	0.503714	0.746366	0.0174305
cg09037813	0.888491	0.339722	0.723108	0.278418	0.826898	0.156659	0.791275	0.935943	0.229879	0.599772	0.170172	0.496003	0.729277	0.936779	0.905541	0.277131	0.132724	0.267683	0.241505	0.736694	0.458361	0.976933	0.168233	0.686914	0.398481	0.781441	0.950256	0.7786	0.919319	0.166531	0.634041	0.288014	0.139998	0.949591	0.732838	0.75276	0.33399	0.342762	0.12734	0.933181	0.305601	0.966025	0.659103	0.133411	0.883388	0.432234	0.962826	0.800037	0.242324
cg11323198	0.164403	0.712209	0.0459154	0.0934148	0.427933	0.572008	0.153678	0.0393721	0.0544112	0.108276	0.0480053	0.129464	0.129924	0.751402	0.803645	0.0302612	0.853189	0.0268903	0.119981	0.281476	0.0359257	0.82234	0.0509562	0.0697485	0.148188	0.0318877	0.0679848	0.0914007	0.432005	0.462969	0.288788	0.129554	0.293085	0.680331	0.22188	0.176304	0.0871097	0.432621	0.0493533	0.0594047	0.883033	0.396598	0.798005	0.0467717	0.0514856	0.0818122	0.078071	0.265123	0.658811
cg20916523	0.290801	0.187402	0.336924	0.692969	0.624871	0.836506	0.608461	0.263277	0.567961	0.228736	0.308903	0.876877	0.444394	0.889606	0.856301	0.0641585	0.172747	0.738723	0.273498	0.395099	0.503104	0.289345	0.134123	0.433734	0.0748936	0.5697	0.30189	0.711591	0.195116	0.466151	0.20283	0.0579918	0.416673	0.139353	0.77352	0.120825	0.303183	0.904065	0.146499	0.102143	0.129094	0.415759	0.0976589	0.233007	0.302983	0.378087	0.866907	0.216542	0.177113
cg04549333	0.425647	0.0745897	0.716443	0.170807	0.605056	0.374934	0.342673	0.116781	0.695927	0.427709	0.78685	0.704256	0.0944984	0.65709	0.437207	0.0374686	0.211352	0.445446	0.224565	0.358652	0.02572	0.889196	0.717178	0.216542	0.357325	0.251754	0.208943	0.692067	0.139035	0.0764178	0.243885	0.624112	0.0687323	0.0255291	0.470252	0.0275173	0.341136	0.843181	0.61373	0.887434	0.667165	0.105231	0.846449	0.496698	0.132032	0.746586	0.802032	0.495631	0.683767
cg21250296	0.025099	0.027288	0.656629	0.0348285	0.51759	0.470158	0.0246453	0.0489849	0.0438743	0.0344055	0.0327131	0.0371801	0.144632	0.115214	0.0401055	0.0296704	0.359865	0.0371191	0.0283406	0.104505	0.0358242	0.0308391	0.0281037	0.761886	0.0249339	0.0277342	0.0382806	0.0482674	0.771602	0.411721	0.030946	0.0738846	0.355368	0.0334305	0.0637066	0.76861	0.0534808	0.0401477	0.0331882	0.320508	0.707468	0.0387307	0.0206095	0.0212465	0.582357	0.0348335	0.801581	0.0329862	0.608654
cg05345286	0.272099	0.214347	0.436102	0.287751	0.035497	0.700795	0.103288	0.0960533	0.0480834	0.475219	0.0414516	0.10062	0.162445	0.872284	0.7868	0.0468408	0.789048	0.0467362	0.117049	0.579016	0.301319	0.0480927	0.0539819	0.0540602	0.320913	0.183395	0.0229419	0.0748182	0.0385383	0.106855	0.644532	0.53039	0.0480228	0.647725	0.144156	0.0468643	0.0488953	0.348848	0.0351966	0.283335	0.91032	0.55376	0.268411	0.0387522	0.0281312	0.0936082	0.0235466	0.168992	0.0627099
cg07717632	0.0884971	0.0276814	0.0247091	0.0445821	0.671861	0.026624	0.0239426	0.0297618	0.0765753	0.0818937	0.0421345	0.0204775	0.031001	0.701915	0.451752	0.051299	0.82432	0.0800448	0.057775	0.115129	0.022736	0.692727	0.0317686	0.0878143	0.0544603	0.0373319	0.690643	0.0543446	0.762439	0.0655175	0.0505428	0.0393618	0.475627	0.026219	0.057685	0.0279515	0.440593	0.032524	0.79672	0.919409	0.547996	0.0405774	0.0648374	0.77395	0.0622929	0.631903	0.646996	0.0305168	0.0256023
cg21026663	0.016019	0.0293507	0.756771	0.0386829	0.653765	0.0438993	0.0144596	0.766374	0.114087	0.0330069	0.0155093	0.0252547	0.0767675	0.0338239	0.0184967	0.0143701	0.0334966	0.0168351	0.0176125	0.120238	0.0226807	0.0494468	0.0322054	0.0328585	0.0483941	0.0212518	0.0218035	0.0225341	0.013566	0.0273383	0.0332512	0.0305397	0.16958	0.0222288	0.015724	0.226835	0.0146953	0.0554865	0.0152156	0.233087	0.050761	0.0316125	0.0149419	0.0211711	0.0398083	0.0168637	0.868054	0.0162881	0.0270951
cg11657808	0.0946175	0.747778	0.041002	0.0546079	0.0623318	0.860969	0.0202649	0.0641716	0.0676489	0.415759	0.047106	0.0170254	0.100655	0.855262	0.403867	0.0326738	0.90611	0.028635	0.0549594	0.451952	0.0470071	0.0370494	0.0550747	0.0341494	0.0416157	0.0369803	0.0429975	0.0487529	0.0532812	0.477905	0.27403	0.126082	0.659619	0.725281	0.0391914	0.0354556	0.0582009	0.032501	0.0471889	0.0618238	0.890376	0.718116	0.346254	0.0357721	0.0338646	0.0567235	0.047106	0.120116	0.887109
cg05222924	0.793232	0.53124	0.782021	0.22914	0.0477502	0.753704	0.0819717	0.639628	0.0964957	0.757992	0.267586	0.138075	0.411313	0.320804	0.511075	0.0302209	0.750951	0.283988	0.263022	0.582399	0.251499	0.119055	0.306733	0.885565	0.955433	0.518657	0.612758	0.119828	0.309387	0.93689	0.80571	0.528312	0.268132	0.619496	0.31205	0.235306	0.0956385	0.712992	0.0826442	0.735171	0.628722	0.834522	0.628252	0.163006	0.254961	0.340931	0.897561	0.810607	0.919088
cg09643544	0.233757	0.53039	0.0752503	0.0785824	0.119098	0.427188	0.128039	0.189213	0.114197	0.511075	0.329602	0.212207	0.24789	0.745029	0.766567	0.03414	0.839815	0.0428523	0.0865384	0.419449	0.328194	0.0415415	0.471811	0.836363	0.647814	0.296021	0.0587711	0.138025	0.0833321	0.839633	0.664192	0.133364	0.598111	0.60399	0.0987755	0.0736686	0.0749686	0.15594	0.149492	0.0664893	0.781897	0.635333	0.198903	0.0686683	0.054617	0.0759151	0.839229	0.387766	0.676739
cg12880658	0.0301143	0.637219	0.541206	0.0318678	0.0384812	0.545282	0.0311808	0.527608	0.0406772	0.105394	0.624019	0.25831	0.168862	0.723797	0.621356	0.605429	0.788875	0.0338857	0.4402	0.433845	0.0477659	0.705472	0.0671885	0.760065	0.284257	0.0211785	0.0249885	0.0592872	0.766643	0.0909402	0.417414	0.358557	0.624762	0.631177	0.0718249	0.0238263	0.0382754	0.301421	0.012616	0.566296	0.751539	0.577859	0.378701	0.557419	0.0330157	0.0142548	0.789335	0.0562418	0.610371
cg00027083	0.492429	0.123904	0.634583	0.312858	0.145354	0.633668	0.203055	0.378295	0.57553	0.461361	0.81356	0.628443	0.462168	0.0291737	0.667749	0.0406943	0.681608	0.695772	0.159376	0.652044	0.414632	0.556109	0.642447	0.0812509	0.575429	0.156722	0.184288	0.245117	0.680583	0.0963507	0.59931	0.48061	0.0816598	0.714766	0.222975	0.3278	0.29375	0.205957	0.427602	0.217492	0.824857	0.701915	0.690818	0.148977	0.0334053	0.10867	0.0568344	0.314896	0.069117
cg25216696	0.0509193	0.654569	0.582059	0.113353	0.0610368	0.578933	0.255159	0.53476	0.330611	0.0384098	0.815086	0.548807	0.184433	0.793566	0.595322	0.472336	0.752626	0.81915	0.681442	0.277498	0.207916	0.833796	0.724269	0.369097	0.367759	0.359865	0.573409	0.130553	0.131058	0.833185	0.0714219	0.653576	0.573818	0.721758	0.395484	0.125994	0.675337	0.424821	0.104379	0.618023	0.637487	0.125763	0.871436	0.439983	0.127072	0.348522	0.373618	0.148028	0.777685
cg05358404	0.346254	0.668381	0.731166	0.06346	0.839011	0.162068	0.406126	0.427709	0.232673	0.281835	0.151241	0.733139	0.132155	0.86238	0.592671	0.0469705	0.816914	0.853537	0.491623	0.479343	0.188173	0.755474	0.33292	0.777317	0.378087	0.144683	0.168862	0.508268	0.868014	0.734155	0.269597	0.420094	0.841212	0.812156	0.378504	0.810656	0.395877	0.950676	0.138575	0.0606985	0.643536	0.414031	0.189875	0.485131	0.0936981	0.121453	0.317435	0.729277	0.439133
cg06958829	0.526407	0.725946	0.785228	0.175221	0.25876	0.721758	0.245117	0.0950187	0.770778	0.593221	0.168418	0.507556	0.49521	0.801869	0.745642	0.294228	0.83495	0.345038	0.124311	0.628081	0.098226	0.818209	0.463172	0.267154	0.783464	0.113436	0.253604	0.161782	0.901677	0.630311	0.640923	0.883152	0.120659	0.909856	0.622878	0.212358	0.243263	0.216845	0.120067	0.93139	0.865641	0.639716	0.518529	0.226393	0.324652	0.16359	0.869114	0.759405	0.70295
cg07533148	0.608269	0.654294	0.0128144	0.0198967	0.0179765	0.69289	0.0220805	0.257515	0.0541005	0.542653	0.0340723	0.00993437	0.388985	0.457756	0.715823	0.00996181	0.738515	0.0202696	0.0128025	0.360691	0.0675573	0.806702	0.132517	0.0385686	0.0292295	0.011037	0.0244063	0.0353005	0.152901	0.772508	0.55639	0.0384611	0.562699	0.867754	0.0207109	0.00625483	0.0415234	0.183534	0.0102287	0.0182944	0.816292	0.646297	0.0564844	0.00840398	0.226752	0.00968867	0.0233742	0.579326	0.592846
cg25691167	0.0912053	0.588247	0.264865	0.00953132	0.068865	0.30624	0.10263	0.566146	0.0600837	0.115007	0.643705	0.600561	0.0545185	0.231696	0.759212	0.494658	0.637685	0.00963059	0.22616	0.247479	0.275549	0.746995	0.403664	0.365017	0.0266893	0.0182587	0.583528	0.0436902	0.612391	0.747995	0.431688	0.540877	0.365612	0.77395	0.192102	0.0914795	0.0757807	0.907213	0.201102	0.132203	0.313544	0.466341	0.556588	0.0182342	0.123447	0.503519	0.820633	0.0715444	0.566545
cg21453309	0.514873	0.202604	0.235654	0.332052	0.877778	0.693864	0.812465	0.788632	0.878867	0.216052	0.340212	0.818743	0.436994	0.661361	0.386391	0.975689	0.752833	0.677591	0.750827	0.259831	0.452551	0.837621	0.44631	0.304433	0.573605	0.316108	0.735308	0.828092	0.392824	0.0301361	0.591894	0.889859	0.446943	0.0372756	0.823137	0.91634	0.855349	0.342137	0.857673	0.484909	0.0493951	0.453679	0.611235	0.345742	0.299876	0.59986	0.214188	0.685906	0.0967737
cg17861230	0.323234	0.728907	0.748219	0.0454178	0.19298	0.718494	0.168862	0.39699	0.147474	0.395974	0.849627	0.75364	0.571248	0.635524	0.800037	0.939725	0.81356	0.918494	0.243356	0.1849	0.276371	0.0740976	0.414948	0.163775	0.501759	0.204945	0.473387	0.274408	0.434879	0.835035	0.754928	0.919319	0.704982	0.831961	0.174145	0.1362	0.274408	0.594507	0.123904	0.106687	0.874063	0.662692	0.776671	0.149676	0.0768492	0.0917493	0.21914	0.752948	0.744402
cg15584813	0.257772	0.577859	0.620165	0.419123	0.656086	0.239082	0.0301143	0.0373769	0.612391	0.0370169	0.801424	0.127072	0.115601	0.0321443	0.025998	0.0684451	0.802843	0.19818	0.519064	0.462787	0.0745524	0.661176	0.21151	0.643001	0.570425	0.0764756	0.108775	0.127723	0.110159	0.430408	0.330801	0.872566	0.216235	0.056977	0.152123	0.801477	0.0693437	0.53039	0.492635	0.111074	0.0272083	0.0479829	0.667838	0.233581	0.541519	0.157281	0.472441	0.0533309	0.0682225
cg26113512	0.0106209	0.0122672	0.583243	0.0309129	0.00913461	0.012925	0.00474944	0.573409	0.725789	0.00680738	0.00717324	0.0134219	0.0616981	0.02265	0.464735	0.00932512	0.00983575	0.00549989	0.00642805	0.270335	0.00734835	0.40602	0.00897822	0.013412	0.815086	0.0109987	0.722812	0.0113494	0.127168	0.0113521	0.0103582	0.0065194	0.0157014	0.891785	0.351832	0.0168874	0.00688689	0.0302942	0.00803823	0.863203	0.00691505	0.00585735	0.365924	0.00773532	0.0112292	0.499481	0.812783	0.0149064	0.00679973
cg04786857	0.0979386	0.56115	0.731738	0.0627099	0.0895777	0.607067	0.107023	0.0921734	0.0725223	0.0551438	0.0201034	0.55752	0.253433	0.687985	0.610471	0.0306434	0.632561	0.0252986	0.0218756	0.476461	0.274708	0.691485	0.156659	0.758791	0.0142684	0.0418336	0.0392137	0.0741921	0.188173	0.71432	0.0475507	0.619793	0.484598	0.711371	0.0876851	0.0185594	0.0252375	0.339528	0.0443924	0.253076	0.807296	0.074016	0.578255	0.0344055	0.193136	0.0402162	0.0390317	0.139789	0.653395
cg16731240	0.0490262	0.0880973	0.100057	0.0276651	0.144906	0.75035	0.0438369	0.0349224	0.199286	0.0973403	0.115408	0.0240151	0.0525253	0.0496847	0.0266123	0.114786	0.057751	0.130781	0.217576	0.520872	0.0428821	0.0314599	0.10266	0.123631	0.288685	0.0361111	0.072772	0.23927	0.0995131	0.021116	0.706194	0.206405	0.401503	0.619793	0.0594392	0.0532812	0.0928512	0.0769497	0.48123	0.10263	0.0569662	0.808717	0.0735797	0.129835	0.0339098	0.136343	0.0340974	0.0467006	0.0879156
cg24750391	0.167795	0.694363	0.359158	0.455969	0.0736506	0.641987	0.819864	0.881732	0.348947	0.515204	0.562298	0.847364	0.0408829	0.848634	0.521511	0.0225619	0.70039	0.497928	0.486193	0.503415	0.468492	0.546702	0.788002	0.798382	0.29468	0.258574	0.838785	0.275828	0.45981	0.758058	0.616208	0.923127	0.590194	0.822392	0.61314	0.327405	0.177627	0.534356	0.584829	0.86443	0.785893	0.0628166	0.404079	0.657544	0.274805	0.7942	0.841303	0.395877	0.593821
cg09971811	0.896136	0.854278	0.292622	0.888652	0.460834	0.697922	0.808199	0.585506	0.870489	0.876475	0.738798	0.973478	0.958261	0.13761	0.961784	0.0356384	0.213074	0.941911	0.958584	0.605903	0.921683	0.602559	0.249494	0.45032	0.807248	0.941424	0.367759	0.801477	0.543977	0.963384	0.927507	0.396296	0.181133	0.666043	0.855218	0.363853	0.805526	0.282118	0.297729	0.182293	0.843133	0.967423	0.42409	0.424285	0.817847	0.446091	0.924603	0.897602	0.922321
cg14958635	0.102049	0.0496592	0.712913	0.115726	0.771661	0.0691648	0.231054	0.0348196	0.0879435	0.10724	0.447664	0.611421	0.345238	0.0354052	0.726775	0.0328305	0.650419	0.0877352	0.586308	0.483232	0.147202	0.706282	0.257002	0.193346	0.0592418	0.057043	0.114316	0.129233	0.226501	0.722812	0.379535	0.480295	0.0750057	0.556777	0.712209	0.0447683	0.0858837	0.0840196	0.0389216	0.753913	0.81769	0.392621	0.359362	0.155405	0.511921	0.0371904	0.701119	0.286145	0.415988
cg26162582	0.293173	0.307013	0.606975	0.0744799	0.0848004	0.679109	0.0824935	0.111037	0.0943305	0.129371	0.767156	0.637865	0.209805	0.474804	0.543568	0.0678582	0.854146	0.0503012	0.0994269	0.36028	0.152123	0.467471	0.139395	0.10636	0.152789	0.0609758	0.46207	0.137505	0.17844	0.816603	0.219211	0.095404	0.596702	0.88097	0.258406	0.0640483	0.165469	0.055716	0.0371339	0.0975587	0.859255	0.618124	0.559406	0.10062	0.0461311	0.0560588	0.0334515	0.252105	0.735682
cg09649610	0.0718249	0.0664601	0.617001	0.478751	0.112229	0.799585	0.140807	0.138323	0.212587	0.194958	0.144739	0.494868	0.191725	0.918775	0.824076	0.21952	0.7126	0.270335	0.123721	0.546284	0.160057	0.848226	0.559826	0.0800033	0.230058	0.224404	0.276559	0.0935526	0.0806058	0.828721	0.193998	0.641715	0.114006	0.887392	0.573712	0.148408	0.103393	0.329118	0.148748	0.767746	0.791981	0.683853	0.180651	0.0677382	0.48039	0.217254	0.099663	0.140255	0.90713
cg15518950	0.789635	0.761252	0.815754	0.901603	0.501225	0.190645	0.884368	0.944075	0.579855	0.743157	0.745642	0.920213	0.907737	0.0301501	0.870745	0.972206	0.788002	0.764073	0.83646	0.214576	0.856553	0.898063	0.53165	0.85073	0.432116	0.803819	0.798172	0.140735	0.834231	0.937464	0.546589	0.95329	0.349974	0.513331	0.675763	0.827661	0.614207	0.926398	0.926785	0.913939	0.957293	0.130456	0.763928	0.865107	0.772566	0.284723	0.840374	0.351832	0.929472
cg19884262	0.0811702	0.63357	0.238556	0.0441474	0.311023	0.661089	0.0980368	0.104379	0.371553	0.0542408	0.390855	0.632654	0.159257	0.597157	0.276846	0.0243278	0.777876	0.0140347	0.0531471	0.542149	0.0774597	0.487029	0.0767326	0.575137	0.031348	0.0633788	0.045254	0.0914528	0.396189	0.767017	0.650223	0.0908536	0.541413	0.391775	0.167481	0.0379743	0.0537641	0.0541407	0.0843111	0.680583	0.814776	0.602768	0.542149	0.149492	0.060278	0.0484105	0.620444	0.16912	0.720557
cg24199834	0.437998	0.614973	0.54537	0.458155	0.123051	0.585698	0.0832632	0.134072	0.349271	0.56412	0.285113	0.567574	0.15697	0.635249	0.737302	0.260102	0.59931	0.252025	0.0620318	0.3867	0.177503	0.790018	0.199213	0.795924	0.111648	0.17844	0.0769272	0.130256	0.106619	0.714097	0.538356	0.26257	0.443566	0.804862	0.457756	0.0747988	0.101197	0.660914	0.0599243	0.582528	0.834522	0.386284	0.389305	0.047651	0.0510785	0.336009	0.0515918	0.307872	0.628166
cg21790626	0.0837848	0.763527	0.839905	0.254961	0.833141	0.704499	0.664993	0.857358	0.137451	0.259736	0.8878	0.0238208	0.137349	0.938529	0.899954	0.945818	0.818108	0.361492	0.822944	0.603594	0.0299923	0.908765	0.473387	0.837195	0.0312574	0.0343103	0.84462	0.0733647	0.75739	0.87988	0.582357	0.82148	0.486705	0.901518	0.426154	0.815136	0.763402	0.320316	0.870706	0.820925	0.896455	0.625222	0.895972	0.90994	0.0856255	0.832721	0.907007	0.395484	0.768674
cg26128092	0.479044	0.716867	0.184634	0.060278	0.208372	0.684534	0.484291	0.247299	0.107546	0.167924	0.0905066	0.141904	0.318033	0.6167	0.762577	0.15944	0.836644	0.0296741	0.184217	0.420187	0.0915056	0.830392	0.317345	0.386828	0.458579	0.136789	0.449669	0.109522	0.225334	0.710449	0.283988	0.42586	0.582059	0.65213	0.138323	0.0909671	0.110003	0.273196	0.0845254	0.210744	0.795811	0.68831	0.581973	0.168356	0.041653	0.119506	0.617925	0.337824	0.720407
cg05740244	0.773329	0.259736	0.619793	0.902912	0.172871	0.623159	0.755539	0.747778	0.598926	0.839862	0.459104	0.865019	0.686643	0.194417	0.591302	0.506035	0.750478	0.85073	0.528815	0.572708	0.692553	0.851773	0.414837	0.837112	0.36426	0.715356	0.215204	0.722468	0.771165	0.530915	0.246698	0.81371	0.33852	0.449466	0.778002	0.735682	0.759212	0.876515	0.319265	0.681291	0.233671	0.0558827	0.487418	0.465143	0.0668054	0.873284	0.798725	0.717332	0.596411
cg18750960	0.765089	0.579855	0.764326	0.21929	0.106492	0.694194	0.20853	0.190645	0.101512	0.682178	0.365327	0.149553	0.445341	0.854957	0.853235	0.0553744	0.838923	0.321119	0.0986865	0.628536	0.185967	0.061862	0.726173	0.849673	0.300358	0.537827	0.252105	0.558085	0.137807	0.902458	0.771793	0.454616	0.595115	0.928717	0.156299	0.146499	0.103758	0.127072	0.182906	0.851729	0.614881	0.772566	0.396189	0.319265	0.385795	0.248491	0.263572	0.821027	0.548217
cg18691434	0.373027	0.646996	0.458155	0.346156	0.0906659	0.0422646	0.74048	0.0376324	0.171421	0.0958448	0.66181	0.595424	0.369002	0.569029	0.585414	0.306055	0.483548	0.0225809	0.557905	0.0683019	0.509522	0.895972	0.573712	0.342137	0.0865384	0.296771	0.0424077	0.100586	0.805768	0.884572	0.21167	0.499774	0.212998	0.783593	0.258215	0.596303	0.0929849	0.749679	0.393027	0.644532	0.803182	0.689693	0.403144	0.365612	0.0172856	0.0991159	0.14758	0.101479	0.519162
cg09099744	0.233501	0.619876	0.481127	0.213651	0.1948	0.613836	0.604395	0.0584467	0.720407	0.515305	0.891214	0.348427	0.266534	0.880006	0.81329	0.419024	0.769675	0.768981	0.412246	0.391673	0.201317	0.824714	0.0943577	0.816502	0.851942	0.378994	0.096677	0.0758417	0.528815	0.702291	0.589121	0.417994	0.325406	0.356524	0.363128	0.743689	0.0401757	0.227314	0.825657	0.915331	0.867507	0.11023	0.830633	0.814881	0.719636	0.552726	0.884727	0.603227	0.845066
cg27235662	0.885267	0.86597	0.248682	0.285016	0.399479	0.898556	0.291296	0.194129	0.754657	0.895893	0.662607	0.320602	0.8992	0.133639	0.931869	0.0836755	0.70295	0.368165	0.306821	0.680033	0.913058	0.378295	0.249054	0.414837	0.416183	0.876672	0.132996	0.817741	0.200736	0.929877	0.876304	0.182568	0.6569	0.645653	0.422598	0.518222	0.245117	0.903609	0.35517	0.475829	0.307676	0.909521	0.172552	0.247723	0.404277	0.446631	0.935362	0.919777	0.909768
cg06220235	0.0221483	0.0371239	0.791981	0.022475	0.788173	0.755796	0.0284226	0.0287533	0.112776	0.0312176	0.0227743	0.0687667	0.0526837	0.549716	0.0338197	0.0379844	0.0530797	0.0138207	0.0155071	0.112327	0.0384812	0.684608	0.0306538	0.138625	0.0328467	0.023351	0.798382	0.0336703	0.0219401	0.0391857	0.0406543	0.459194	0.0288418	0.024507	0.25478	0.0331792	0.0364367	0.0608493	0.0204752	0.291478	0.0185126	0.03231	0.0220931	0.598815	0.0141518	0.0202479	0.032171	0.0573206	0.0294965
cg25942450	0.617276	0.0617985	0.404587	0.0435956	0.241505	0.0516347	0.277131	0.070815	0.10577	0.491517	0.274135	0.649939	0.171954	0.719726	0.541837	0.0450671	0.0661015	0.0289343	0.055447	0.645457	0.160537	0.87241	0.112962	0.121713	0.0281476	0.106287	0.0700927	0.145077	0.501339	0.649686	0.579121	0.0367549	0.0714219	0.0599739	0.0635125	0.0626262	0.0582484	0.442406	0.0583522	0.740629	0.65709	0.726475	0.0700767	0.0705057	0.0623318	0.087565	0.0301216	0.381216	0.614881
cg24194775	0.827798	0.26923	0.161422	0.238649	0.34032	0.859592	0.305876	0.152071	0.504395	0.376379	0.555815	0.0995471	0.337237	0.894947	0.656363	0.347905	0.94653	0.382065	0.377874	0.534257	0.262925	0.111878	0.355657	0.28462	0.152006	0.142371	0.318237	0.435481	0.27824	0.108632	0.760776	0.30551	0.190494	0.95329	0.186311	0.159502	0.496204	0.250561	0.547803	0.899491	0.126513	0.792891	0.670394	0.314029	0.160118	0.359465	0.162946	0.80719	0.135307
cg22268231	0.111396	0.154497	0.154082	0.359257	0.689939	0.614686	0.640119	0.257772	0.497409	0.091016	0.27228	0.731094	0.480907	0.866734	0.107272	0.448546	0.525895	0.792091	0.332345	0.158431	0.367759	0.8687	0.483344	0.379772	0.740127	0.208072	0.737637	0.153127	0.470891	0.4961	0.149611	0.612391	0.310638	0.74939	0.687886	0.40469	0.302504	0.423675	0.342673	0.582163	0.101947	0.107899	0.485562	0.653858	0.433534	0.625699	0.117743	0.187325	0.254217
cg13488201	0.349375	0.497607	0.0686838	0.0832632	0.712913	0.73239	0.0817268	0.0434136	0.370553	0.227642	0.413401	0.733289	0.109297	0.731961	0.782138	0.0488233	0.824952	0.0779256	0.165036	0.0949085	0.236615	0.71206	0.238138	0.203733	0.11023	0.064515	0.136343	0.21151	0.0522749	0.883964	0.709528	0.497501	0.39908	0.821573	0.153071	0.0511232	0.14814	0.0395683	0.0527973	0.184703	0.524949	0.732838	0.211352	0.0462903	0.048236	0.0934968	0.702373	0.512537	0.856719
cg10430690	0.844803	0.91032	0.646996	0.268696	0.480907	0.91561	0.44631	0.416183	0.43113	0.823096	0.384744	0.167351	0.40104	0.931816	0.602276	0.255781	0.838653	0.46167	0.513533	0.798502	0.242506	0.147202	0.417814	0.677167	0.947081	0.527395	0.246518	0.916528	0.473274	0.912025	0.931972	0.25533	0.882953	0.91438	0.390052	0.240041	0.627803	0.945134	0.559928	0.580538	0.916899	0.838736	0.70295	0.531022	0.360495	0.626839	0.92327	0.885929	0.895391
cg06995715	0.0896452	0.509414	0.498035	0.0467362	0.689292	0.764661	0.0525617	0.27403	0.104443	0.543568	0.568649	0.203216	0.0715791	0.141757	0.828344	0.0597766	0.848499	0.382583	0.261041	0.194958	0.0455738	0.0587835	0.0436639	0.114353	0.479863	0.0556957	0.0663823	0.0720638	0.0756046	0.516221	0.218323	0.128225	0.23218	0.960219	0.13286	0.106253	0.0548194	0.0165795	0.0108326	0.666403	0.23746	0.0614439	0.176304	0.185818	0.0913461	0.0312723	0.434172	0.0945846	0.0451112
cg12629325	0.0314027	0.352908	0.0513168	0.0351462	0.0469927	0.0236477	0.0354678	0.0858087	0.0294249	0.0148653	0.0247848	0.0261867	0.0980063	0.727618	0.0402044	0.169449	0.844316	0.0329545	0.600737	0.59393	0.0169687	0.902147	0.024903	0.0298717	0.0391221	0.0531189	0.0418336	0.0446859	0.123313	0.120445	0.0262855	0.136448	0.748366	0.0286855	0.072558	0.0225994	0.0288386	0.0666151	0.12189	0.105916	0.0666849	0.0419087	0.075703	0.0322207	0.0603404	0.117501	0.0825179	0.0821296	0.892571
cg11394785	0.198391	0.645361	0.227078	0.0528717	0.389836	0.594608	0.109373	0.336334	0.294039	0.107716	0.0891995	0.0313136	0.0743921	0.682021	0.838002	0.049719	0.654204	0.0804085	0.119255	0.302787	0.0648954	0.700719	0.0654191	0.480295	0.806265	0.0843966	0.479652	0.224904	0.798965	0.807935	0.142704	0.0310161	0.295523	0.866058	0.745642	0.180517	0.637963	0.605528	0.0932771	0.672454	0.853361	0.191001	0.108632	0.0794979	0.231611	0.628536	0.71114	0.550621	0.617553
cg21870884	0.201534	0.162632	0.170105	0.0772652	0.303868	0.112327	0.407029	0.2145	0.532944	0.156299	0.444806	0.883839	0.622584	0.829663	0.59941	0.187819	0.197606	0.194272	0.188173	0.639927	0.189875	0.62184	0.364594	0.345742	0.0192826	0.165835	0.239542	0.371553	0.797003	0.290515	0.585982	0.175702	0.121808	0.0299561	0.246425	0.418906	0.395004	0.935466	0.382065	0.853806	0.0299031	0.219362	0.445132	0.51726	0.26202	0.189079	0.855655	0.21151	0.653481
cg06263495	0.0862336	0.0951301	0.0914289	0.0453881	0.0641867	0.805589	0.0929315	0.0842779	0.0963507	0.0477502	0.0626538	0.375748	0.0494545	0.904754	0.661717	0.438615	0.896735	0.0736852	0.0571356	0.517688	0.105266	0.463172	0.097008	0.0643169	0.0256712	0.0714061	0.0558617	0.0802199	0.0645025	0.892806	0.0325833	0.0554368	0.0443518	0.0196329	0.125032	0.203798	0.0867653	0.0307219	0.0850132	0.0620704	0.0177261	0.794812	0.068716	0.123904	0.0327769	0.0774502	0.949915	0.0695825	0.843957
cg08118311	0.598319	0.29384	0.523534	0.0177079	0.0552735	0.612012	0.543773	0.0490341	0.175435	0.243356	0.292622	0.566146	0.0699045	0.727096	0.753164	0.922885	0.579016	0.420698	0.572409	0.35764	0.0990528	0.762439	0.0932771	0.586604	0.0335956	0.0473337	0.451449	0.0769685	0.51243	0.749679	0.448546	0.378701	0.0290591	0.742652	0.578255	0.0284665	0.0579692	0.288399	0.0146624	0.514045	0.788002	0.318447	0.0379151	0.078908	0.16307	0.0952865	0.399919	0.58766	0.629652
cg24638647	0.0422582	0.401614	0.0395126	0.0422924	0.0541312	0.549104	0.103589	0.0607244	0.574529	0.0693437	0.0693437	0.0480679	0.0525814	0.64836	0.0446274	0.0845942	0.566948	0.0798751	0.0403453	0.319735	0.0579445	0.046225	0.0548827	0.630582	0.0604019	0.047612	0.0623447	0.0944984	0.0581901	0.70539	0.0563332	0.0842779	0.229216	0.787759	0.658722	0.0577187	0.0389959	0.804693	0.102049	0.847151	0.774013	0.0384297	0.527901	0.115408	0.0538916	0.0844241	0.751333	0.0565701	0.301024
cg26267310	0.418099	0.155707	0.728419	0.124651	0.649939	0.673517	0.316108	0.531987	0.118772	0.421205	0.12541	0.578544	0.194064	0.108632	0.245117	0.0642002	0.781492	0.664384	0.228101	0.427398	0.593041	0.141328	0.565837	0.777194	0.666043	0.510541	0.128262	0.433231	0.116575	0.88662	0.606394	0.435678	0.0723111	0.856553	0.318351	0.0768054	0.0786632	0.69166	0.415142	0.82008	0.250306	0.261041	0.635157	0.716371	0.584221	0.0457203	0.0373463	0.649686	0.813093
cg22709192	0.0911017	0.613934	0.362506	0.0464952	0.144467	0.0549246	0.106454	0.0522109	0.403664	0.229617	0.28701	0.343165	0.172289	0.933181	0.878948	0.55772	0.619179	0.0463637	0.351356	0.46685	0.134924	0.618872	0.0748361	0.102947	0.645827	0.217414	0.149611	0.134349	0.0597766	0.63357	0.309782	0.423262	0.172016	0.746586	0.164267	0.0639535	0.0687323	0.442509	0.0348467	0.1343	0.835086	0.648548	0.105065	0.0618238	0.0300277	0.0588301	0.0950998	0.560746	0.0727176
cg07634191	0.164713	0.482608	0.49252	0.809416	0.203055	0.610276	0.337728	0.419237	0.222478	0.11914	0.130066	0.646009	0.549209	0.7182	0.682608	0.244631	0.575137	0.0931325	0.200263	0.728771	0.693364	0.926398	0.671756	0.396399	0.223993	0.336334	0.301505	0.230897	0.4427	0.0567779	0.212752	0.77891	0.234446	0.142371	0.213231	0.494257	0.239966	0.525477	0.314029	0.216542	0.271445	0.076538	0.153179	0.117501	0.212587	0.124869	0.558574	0.601228	0.698787
cg18552413	0.277319	0.367245	0.194064	0.793739	0.315203	0.119868	0.797889	0.234283	0.529853	0.165411	0.099663	0.681946	0.695519	0.327297	0.333017	0.886369	0.116121	0.357325	0.522942	0.29281	0.805993	0.147686	0.730278	0.243446	0.635972	0.48312	0.649244	0.322754	0.0784037	0.0718943	0.155156	0.886369	0.18747	0.21051	0.842807	0.753913	0.689134	0.375949	0.687387	0.317077	0.0384863	0.56189	0.714251	0.343539	0.58766	0.380085	0.180926	0.128764	0.407455
cg14976276	0.01681	0.0189073	0.0207948	0.0234498	0.710746	0.0206048	0.0211186	0.735377	0.235306	0.0281409	0.0152505	0.0150505	0.0135396	0.565255	0.0216733	0.770188	0.140606	0.0204923	0.024502	0.0181786	0.0195123	0.0205806	0.0199666	0.0260267	0.0245272	0.0174447	0.0102347	0.0153853	0.0173783	0.0164404	0.591703	0.0303534	0.0190268	0.0370986	0.0766927	0.0211035	0.0154962	0.0151018	0.0163274	0.581248	0.0151426	0.0183744	0.0895915	0.0145039	0.807724	0.0152635	0.019271	0.650318	0.0163481
cg08575537	0.30189	0.173886	0.610371	0.315602	0.463585	0.752561	0.212431	0.307776	0.721533	0.255955	0.761188	0.568063	0.417905	0.822186	0.79856	0.0617361	0.872734	0.597906	0.360875	0.718725	0.192395	0.84409	0.671581	0.155526	0.599956	0.0600227	0.509089	0.320602	0.608366	0.021576	0.467152	0.843321	0.280926	0.909601	0.679724	0.109966	0.234963	0.0433361	0.258574	0.459916	0.812156	0.656543	0.242142	0.51118	0.0676025	0.119098	0.343743	0.166983	0.726709
cg07260592	0.559406	0.638591	0.389305	0.107899	0.23618	0.702449	0.235565	0.543355	0.455038	0.189945	0.226225	0.250306	0.111912	0.477704	0.75035	0.0814543	0.794698	0.205814	0.210288	0.249588	0.139998	0.759077	0.620262	0.242757	0.0714727	0.379416	0.230812	0.35242	0.191218	0.10288	0.701033	0.0863213	0.70039	0.243446	0.189365	0.175291	0.23259	0.669968	0.29384	0.784079	0.0714914	0.301798	0.5904	0.23325	0.156842	0.409637	0.0445821	0.287302	0.336334
cg00202711	0.17208	0.757661	0.39104	0.29667	0.80064	0.387553	0.111684	0.472657	0.169846	0.515702	0.588927	0.54537	0.113703	0.721846	0.830873	0.850554	0.781959	0.192174	0.628443	0.453468	0.160238	0.714548	0.133796	0.416673	0.491517	0.188039	0.17429	0.167795	0.69503	0.600353	0.405917	0.153127	0.641898	0.907564	0.702617	0.158724	0.16912	0.236526	0.283862	0.221622	0.514261	0.375659	0.809895	0.148511	0.220246	0.748292	0.749464	0.0905891	0.586798
cg15747595	0.188607	0.717025	0.658912	0.0612395	0.201844	0.568063	0.179727	0.603407	0.4907	0.223417	0.788875	0.440296	0.604777	0.694785	0.799138	0.183112	0.781082	0.66181	0.589312	0.626928	0.249494	0.227233	0.561794	0.826163	0.0186958	0.128535	0.30692	0.26681	0.734381	0.756248	0.131058	0.233757	0.620165	0.724987	0.267154	0.136496	0.309387	0.715659	0.355939	0.889441	0.848674	0.467471	0.582163	0.178989	0.601228	0.644801	0.548807	0.192475	0.726775
cg20289949	0.186165	0.186659	0.853632	0.348745	0.190778	0.79306	0.859087	0.342137	0.163293	0.17844	0.163293	0.686333	0.635619	0.900721	0.338231	0.371451	0.933412	0.439643	0.388985	0.42534	0.243263	0.923031	0.358038	0.701603	0.221549	0.252188	0.21059	0.193998	0.791571	0.243446	0.164839	0.829115	0.157398	0.211352	0.518437	0.369302	0.155461	0.620356	0.264766	0.82264	0.285785	0.147141	0.282973	0.551119	0.786749	0.206715	0.89401	0.184503	0.178318
cg03734874	0.574437	0.151286	0.67792	0.0778848	0.0980682	0.0743557	0.0294377	0.0740976	0.150969	0.502405	0.187166	0.368376	0.344127	0.0423152	0.845642	0.0241726	0.317855	0.70539	0.180455	0.48197	0.234118	0.217912	0.575629	0.0978098	0.0127677	0.324346	0.0948819	0.221622	0.150389	0.715438	0.46443	0.156234	0.074263	0.77497	0.0878903	0.0346566	0.0865156	0.0574748	0.11304	0.137152	0.669014	0.565837	0.463911	0.240199	0.0377458	0.0912053	0.0197685	0.694194	0.679724
cg27020690	0.0134649	0.536407	0.0138914	0.014849	0.0234035	0.514045	0.0273093	0.564536	0.0244943	0.0149793	0.135165	0.0149533	0.0137875	0.338025	0.0176034	0.0159892	0.757992	0.0247987	0.0178939	0.0138597	0.020014	0.010719	0.017093	0.783841	0.0115595	0.0187097	0.0375787	0.0198798	0.707934	0.556878	0.0142459	0.123952	0.51343	0.019943	0.566041	0.0083107	0.0153793	0.0184603	0.0195289	0.0539929	0.813401	0.0216709	0.0144227	0.0148904	0.0219427	0.0224518	0.779859	0.159313	0.529756
cg07778029	0.11378	0.630878	0.614481	0.0264533	0.268224	0.566545	0.243446	0.512736	0.573005	0.470891	0.596873	0.73103	0.0692495	0.779242	0.422138	0.695519	0.630311	0.214263	0.496407	0.363433	0.109933	0.79362	0.345845	0.0865384	0.021236	0.0539503	0.447852	0.0354832	0.0589287	0.76216	0.591504	0.44631	0.526092	0.801424	0.239368	0.0438993	0.177372	0.242835	0.0121185	0.800204	0.811526	0.508475	0.0326467	0.294781	0.277851	0.133455	0.650782	0.430915	0.581361
cg16772207	0.837153	0.428338	0.742518	0.905002	0.869392	0.339633	0.911727	0.958584	0.660271	0.528923	0.939154	0.945134	0.913151	0.55639	0.923687	0.871231	0.423776	0.878677	0.517163	0.702868	0.87988	0.592671	0.920964	0.956682	0.945316	0.843957	0.68136	0.904151	0.307378	0.638883	0.84872	0.943582	0.738582	0.322365	0.554996	0.444301	0.893124	0.95033	0.890338	0.356918	0.298881	0.895266	0.823315	0.911936	0.754448	0.515902	0.836778	0.291862	0.285679
cg13577076	0.185745	0.599956	0.507767	0.166531	0.128402	0.716867	0.117029	0.0703063	0.141757	0.0774005	0.0995471	0.0676489	0.084824	0.894693	0.751472	0.068318	0.81534	0.232937	0.0740976	0.210434	0.0822198	0.73103	0.0629496	0.101416	0.147255	0.108879	0.0348556	0.0406888	0.809314	0.731664	0.323234	0.164777	0.269971	0.771348	0.102408	0.0833084	0.0743921	0.0457339	0.0416	0.777005	0.841118	0.241332	0.18388	0.134783	0.0517683	0.0786632	0.0969527	0.283902	0.667079
cg01354473	0.654033	0.750619	0.821128	0.178318	0.372298	0.741564	0.600353	0.46504	0.751203	0.726552	0.908594	0.528312	0.247552	0.80632	0.814929	0.869866	0.837153	0.325606	0.618323	0.703625	0.212921	0.871076	0.310052	0.769044	0.74135	0.0864895	0.815136	0.136448	0.341136	0.807619	0.314222	0.715134	0.659182	0.867225	0.797889	0.231447	0.664192	0.338318	0.0336742	0.844223	0.880508	0.646192	0.56189	0.651762	0.198099	0.737368	0.860537	0.713537	0.706803
cg26757053	0.0458895	0.222645	0.53305	0.732692	0.520689	0.570308	0.368273	0.742102	0.100057	0.0692647	0.587462	0.0619903	0.6167	0.562298	0.735032	0.172552	0.377592	0.659254	0.378295	0.0729027	0.623543	0.33993	0.528103	0.730587	0.670655	0.357008	0.395673	0.0560912	0.712135	0.826853	0.0467154	0.780608	0.235306	0.689939	0.638591	0.709207	0.408031	0.702783	0.163006	0.136056	0.826561	0.051652	0.754518	0.113118	0.582721	0.437892	0.491113	0.077948	0.722302
cg15812957	0.91215	0.359762	0.421926	0.566343	0.257271	0.499981	0.472962	0.46207	0.236007	0.354275	0.316472	0.491219	0.559119	0.09164	0.935883	0.348427	0.192916	0.974461	0.733919	0.168418	0.913939	0.0644718	0.942797	0.0989286	0.472336	0.901275	0.41019	0.38227	0.669352	0.462681	0.391363	0.516117	0.151944	0.214424	0.912916	0.37606	0.430082	0.391464	0.813241	0.135651	0.0604271	0.283988	0.711294	0.691747	0.552213	0.201687	0.346768	0.269417	0.577577
cg08441170	0.0595464	0.729128	0.0387033	0.00910619	0.0441203	0.65051	0.0162737	0.0270698	0.0842077	0.587089	0.0574065	0.025998	0.033247	0.714691	0.620635	0.0102792	0.826719	0.0239161	0.0370311	0.550727	0.0436139	0.0314065	0.0606246	0.373218	0.0269728	0.0282252	0.0381291	0.0658269	0.0371339	0.631821	0.136844	0.0287763	0.647618	0.709681	0.0326315	0.032724	0.0633366	0.0323932	0.0295762	0.0447471	0.0667459	0.76379	0.67638	0.0396793	0.0229851	0.0266095	0.0670684	0.0892219	0.771032
cg26850754	0.365327	0.0622531	0.0575197	0.415988	0.0716329	0.760513	0.449898	0.212045	0.150059	0.37606	0.041653	0.710516	0.0573536	0.9006	0.14758	0.124833	0.729768	0.136056	0.184974	0.510228	0.0936082	0.892244	0.0920704	0.0640483	0.0800448	0.0650789	0.0623066	0.0657251	0.387231	0.0648516	0.444503	0.319361	0.0459999	0.811725	0.560422	0.180853	0.134024	0.0225669	0.066962	0.118433	0.765905	0.0898628	0.0668341	0.0544504	0.219851	0.256656	0.0177212	0.292715	0.0565805
cg00777121	0.0311057	0.273664	0.0960269	0.0772262	0.0603656	0.515593	0.170807	0.0944413	0.187749	0.147634	0.0343663	0.160537	0.112739	0.660818	0.676038	0.0380591	0.730798	0.0251531	0.0445526	0.554267	0.209724	0.589121	0.168112	0.0607648	0.0388202	0.0549798	0.336639	0.134446	0.733842	0.541519	0.672891	0.837195	0.285594	0.0335494	0.0967078	0.126597	0.042815	0.808522	0.0183765	0.7359	0.70563	0.518334	0.0515554	0.0331029	0.0316622	0.0217675	0.743354	0.604777	0.0244038
cg07307078	0.0923448	0.302692	0.132155	0.599492	0.784026	0.669707	0.639824	0.260198	0.684271	0.606975	0.0558617	0.727396	0.202749	0.69412	0.15944	0.863876	0.66829	0.27937	0.545282	0.0519298	0.345742	0.833407	0.609511	0.472547	0.0617859	0.209805	0.714023	0.141904	0.494166	0.575429	0.661089	0.849582	0.0653297	0.0578196	0.775662	0.768928	0.623159	0.466051	0.788114	0.825763	0.644621	0.664805	0.410302	0.726475	0.79609	0.618323	0.844357	0.55183	0.447664
cg10238818	0.094558	0.48123	0.0490341	0.0483614	0.11067	0.51313	0.0626397	0.533955	0.0804302	0.458473	0.459297	0.432234	0.0483147	0.514568	0.673065	0.0331882	0.616005	0.151833	0.0922626	0.434769	0.0200846	0.488587	0.0801306	0.669172	0.128622	0.018188	0.135748	0.0833321	0.501446	0.387456	0.429677	0.096082	0.55542	0.797345	0.0619629	0.0352688	0.102176	0.0237282	0.0487529	0.0309312	0.571537	0.445989	0.503714	0.0282809	0.0508558	0.0699401	0.022558	0.192395	0.661717
cg14991487	0.190218	0.780157	0.0491293	0.0177488	0.0324934	0.817341	0.30199	0.0383376	0.0424517	0.039458	0.0163167	0.236615	0.143076	0.0169613	0.584928	0.0160863	0.02308	0.0278771	0.0180255	0.731299	0.0557688	0.0128289	0.028483	0.760911	0.018147	0.0133834	0.0458148	0.0679079	0.0129904	0.519468	0.0178917	0.447153	0.308346	0.786019	0.0572285	0.0148354	0.0396055	0.0252956	0.0153034	0.0170424	0.0331442	0.252823	0.026699	0.0185816	0.0145206	0.142704	0.0184377	0.524118	0.730955
cg06498267	0.571248	0.486193	0.139143	0.0889307	0.239451	0.485452	0.0395683	0.0130821	0.524118	0.333697	0.0645607	0.433128	0.140102	0.641811	0.787409	0.5559	0.700552	0.0456286	0.0681445	0.279918	0.209977	0.495907	0.169712	0.0510876	0.623543	0.0251622	0.063994	0.137705	0.296865	0.221549	0.681781	0.364476	0.519975	0.833796	0.0777785	0.275261	0.107936	0.430408	0.0421034	0.0618884	0.470684	0.385063	0.708481	0.0901308	0.384451	0.103758	0.0174656	0.508772	0.638883
cg14826456	0.135603	0.186597	0.764141	0.636545	0.1478	0.672804	0.532395	0.140356	0.244631	0.173759	0.208148	0.611523	0.227078	0.391464	0.720634	0.473274	0.819919	0.268696	0.096677	0.367963	0.191441	0.609235	0.724562	0.636449	0.0151455	0.082269	0.212506	0.225246	0.222296	0.735531	0.181204	0.376475	0.126034	0.701201	0.398265	0.122142	0.170868	0.539749	0.258406	0.750021	0.883307	0.707544	0.35242	0.0990528	0.722611	0.566343	0.0769077	0.107342	0.721007
cg06646021	0.29543	0.294781	0.453372	0.687985	0.266165	0.191077	0.648275	0.909897	0.537721	0.412141	0.358754	0.583444	0.285292	0.124833	0.56786	0.579745	0.192698	0.0933159	0.664889	0.360088	0.425023	0.584121	0.877205	0.391464	0.399479	0.35242	0.599207	0.626545	0.883388	0.469126	0.278707	0.71098	0.526799	0.104992	0.649939	0.667749	0.614881	0.793453	0.519878	0.647078	0.907432	0.188241	0.497928	0.254131	0.21213	0.51697	0.472862	0.300169	0.67638
cg24687051	0.0246396	0.0386248	0.0189307	0.0263398	0.0142128	0.723259	0.0362241	0.0208044	0.025287	0.229879	0.0245692	0.00979254	0.01362	0.372601	0.756248	0.0447263	0.859557	0.351731	0.0133566	0.642346	0.0254676	0.0260326	0.0148087	0.0516347	0.0120495	0.0193252	0.0298197	0.0232112	0.0200937	0.033666	0.0881978	0.31905	0.0193874	0.35418	0.0245433	0.00983575	0.0182249	0.0137898	0.0176875	0.0178215	0.885318	0.0229346	0.618507	0.0216284	0.0409266	0.0301143	0.0343103	0.161782	0.80862
cg25509184	0.114672	0.435481	0.661361	0.631732	0.660914	0.357841	0.636063	0.807619	0.169316	0.108033	0.824222	0.530283	0.176237	0.770001	0.0412116	0.83408	0.70635	0.0472725	0.764141	0.173631	0.199358	0.453568	0.659907	0.797563	0.589807	0.251414	0.67021	0.236945	0.152123	0.772058	0.13074	0.803819	0.489075	0.372298	0.664805	0.715204	0.207592	0.0575543	0.514261	0.837339	0.805645	0.0806969	0.321011	0.679187	0.082243	0.086155	0.750153	0.0872084	0.645733
cg04451770	0.311188	0.11662	0.6243	0.830152	0.784825	0.0825582	0.586505	0.855792	0.337428	0.246791	0.765089	0.826359	0.532944	0.0679552	0.270702	0.033811	0.129508	0.839543	0.815705	0.154388	0.329817	0.127952	0.680675	0.34153	0.611906	0.563205	0.138122	0.287751	0.189213	0.0803904	0.415044	0.819205	0.0876383	0.174964	0.760581	0.64952	0.465535	0.863245	0.171483	0.403346	0.104379	0.27403	0.191871	0.636449	0.66926	0.570938	0.883592	0.656856	0.150498
cg20507276	0.343356	0.525803	0.121673	0.0356649	0.530915	0.487228	0.030599	0.331763	0.400831	0.333017	0.0507444	0.383919	0.323234	0.342243	0.66768	0.0523031	0.777623	0.046978	0.032524	0.315501	0.571348	0.566434	0.0694226	0.474804	0.324749	0.263372	0.284076	0.330801	0.794752	0.679987	0.201317	0.0491141	0.675164	0.764326	0.0501136	0.0521184	0.244868	0.363022	0.732465	0.0348116	0.546811	0.549414	0.720332	0.0250851	0.154332	0.0591215	0.0477364	0.485881	0.711294
cg16363586	0.0619752	0.0950998	0.599956	0.714985	0.668473	0.0249831	0.0903716	0.866647	0.0949085	0.0956385	0.378889	0.691231	0.139998	0.774847	0.669707	0.0684933	0.344509	0.0271434	0.0262765	0.205589	0.370646	0.363746	0.179991	0.523444	0.673166	0.455231	0.465245	0.54046	0.262925	0.658722	0.0604508	0.0466053	0.359762	0.0348239	0.310359	0.709754	0.301319	0.759147	0.14887	0.224485	0.762639	0.453179	0.0387623	0.230728	0.0631819	0.801424	0.773067	0.384552	0.317756
cg23412850	0.193702	0.556208	0.0672819	0.157743	0.0506311	0.449565	0.737569	0.0429111	0.0718784	0.0735797	0.65322	0.637487	0.150901	0.659454	0.266088	0.0533214	0.690991	0.797138	0.73612	0.179787	0.251155	0.808781	0.423995	0.700058	0.0936981	0.235565	0.0194964	0.164915	0.0719127	0.651953	0.371887	0.477077	0.0373609	0.0303687	0.577465	0.0766162	0.253521	0.510648	0.0267272	0.641898	0.813145	0.407936	0.246337	0.716787	0.467471	0.0265504	0.830439	0.0944122	0.567243
cg27159719	0.773401	0.253604	0.165968	0.19618	0.553449	0.612391	0.632654	0.485996	0.121635	0.306055	0.802421	0.250124	0.398265	0.692067	0.246255	0.396189	0.159313	0.227002	0.420187	0.585698	0.230974	0.358038	0.202148	0.696706	0.256567	0.488274	0.64717	0.308346	0.622303	0.257002	0.768674	0.182803	0.118228	0.188385	0.679109	0.659103	0.252991	0.407455	0.421307	0.450937	0.239013	0.798277	0.43498	0.75631	0.835187	0.268881	0.508978	0.691571	0.341339
cg20191453	0.286531	0.211972	0.814114	0.922841	0.895607	0.0850898	0.722223	0.932861	0.807513	0.509197	0.891987	0.058037	0.154861	0.888967	0.693041	0.728982	0.570012	0.188741	0.759465	0.566146	0.30881	0.917699	0.896942	0.863332	0.9162	0.368273	0.904557	0.641543	0.893087	0.493132	0.162882	0.668473	0.383527	0.0639665	0.809689	0.864126	0.739307	0.0951885	0.941197	0.885061	0.933986	0.145418	0.204871	0.905002	0.808717	0.846086	0.918588	0.27928	0.139789
cg18722841	0.320409	0.602559	0.492112	0.0961984	0.524847	0.546182	0.0860091	0.0828696	0.0603173	0.0925325	0.191799	0.550914	0.0862336	0.585698	0.491711	0.0218934	0.759861	0.0437245	0.0217845	0.371451	0.107716	0.759147	0.170357	0.592569	0.0264446	0.0221059	0.129965	0.0839763	0.473057	0.326109	0.523922	0.388057	0.449063	0.848993	0.105425	0.0580728	0.0299597	0.502405	0.0224911	0.136985	0.826057	0.5043	0.5323	0.0336943	0.0492879	0.114427	0.222389	0.132107	0.601805
cg12619509	0.312756	0.327897	0.16609	0.224144	0.355262	0.135403	0.158546	0.509197	0.870663	0.407455	0.342032	0.0844493	0.247723	0.909012	0.611906	0.173954	0.241412	0.115214	0.255955	0.444592	0.196402	0.904151	0.417994	0.777623	0.312434	0.173954	0.209104	0.498944	0.241837	0.117943	0.160714	0.08888	0.610567	0.722963	0.637865	0.266088	0.418202	0.248682	0.46167	0.193564	0.122366	0.124693	0.303281	0.26698	0.138928	0.258215	0.0648374	0.29724	0.111953
cg01420388	0.547202	0.788059	0.323762	0.850819	0.580834	0.532395	0.593531	0.392298	0.890608	0.458361	0.735531	0.393332	0.456067	0.837573	0.929128	0.244868	0.60772	0.439028	0.854578	0.497501	0.681204	0.972424	0.45063	0.752347	0.229056	0.212431	0.570734	0.729633	0.868219	0.820773	0.674741	0.64691	0.737169	0.747444	0.842122	0.534152	0.816448	0.445989	0.490804	0.856301	0.902701	0.159818	0.736954	0.639628	0.837621	0.843957	0.117619	0.627716	0.606507
cg09626984	0.121241	0.736489	0.618706	0.0503177	0.142972	0.748789	0.539848	0.555725	0.66243	0.110774	0.655568	0.506524	0.260845	0.657349	0.797003	0.683023	0.700954	0.766567	0.264302	0.538149	0.179524	0.798502	0.195045	0.493231	0.311279	0.109933	0.653308	0.226501	0.350576	0.674662	0.106421	0.418687	0.70014	0.881365	0.257593	0.153179	0.560641	0.169846	0.342583	0.731738	0.819503	0.118267	0.453987	0.65213	0.107546	0.625222	0.353764	0.190921	0.763272
cg04600618	0.24292	0.614686	0.775902	0.229368	0.5904	0.245117	0.0348285	0.0312102	0.0566318	0.390254	0.488862	0.392412	0.116042	0.775031	0.50713	0.0348875	0.639628	0.0354744	0.278142	0.225755	0.0615581	0.036735	0.260371	0.645827	0.0358097	0.060207	0.4209	0.119706	0.814983	0.661717	0.277498	0.0493765	0.315703	0.522942	0.251414	0.020286	0.393633	0.433426	0.0493951	0.868545	0.514153	0.277668	0.289718	0.572008	0.0489613	0.421114	0.759212	0.34153	0.021183
cg10088985	0.290139	0.0313367	0.585034	0.0201007	0.0462318	0.523347	0.0603173	0.0411536	0.0493683	0.030621	0.104119	0.654294	0.141806	0.0264057	0.0303572	0.0227567	0.74135	0.0342793	0.339425	0.0538322	0.129744	0.0647785	0.187166	0.0383217	0.0454314	0.0405091	0.0492805	0.114166	0.0276302	0.0532723	0.403144	0.593429	0.0331882	0.0277944	0.273498	0.0556957	0.164915	0.0240688	0.0389116	0.450019	0.0347648	0.035758	0.0242803	0.160946	0.0182608	0.0169474	0.659182	0.0564307	0.0203077
cg02008154	0.57251	0.604311	0.209259	0.0836035	0.308903	0.43137	0.136543	0.0789478	0.0699219	0.099084	0.0367063	0.405507	0.249327	0.458674	0.698386	0.100691	0.708259	0.530708	0.0480758	0.372099	0.227314	0.0409266	0.405601	0.0574748	0.019416	0.147255	0.0690244	0.142704	0.0811234	0.458674	0.641987	0.513854	0.391566	0.763928	0.260651	0.0600716	0.062937	0.510433	0.13689	0.0408645	0.816022	0.581973	0.328709	0.0411705	0.0555386	0.282019	0.0426902	0.57727	0.049386
cg13763232	0.435888	0.19298	0.443019	0.886816	0.301121	0.200498	0.826853	0.538149	0.26257	0.345447	0.453468	0.880762	0.884046	0.442509	0.885846	0.0445821	0.253702	0.358754	0.223244	0.538468	0.908515	0.841893	0.937574	0.46443	0.128225	0.790131	0.535078	0.836317	0.219362	0.0632091	0.876437	0.860789	0.695686	0.111253	0.862694	0.591993	0.671159	0.844929	0.574628	0.617553	0.0671743	0.711516	0.33683	0.475829	0.824518	0.206796	0.743419	0.784634	0.146106
cg04528819	0.14742	0.0721324	0.154204	0.276741	0.670471	0.0648516	0.475411	0.157281	0.162761	0.045166	0.059355	0.781679	0.0772057	0.0696813	0.704821	0.746995	0.149203	0.0393512	0.0513803	0.0671296	0.281381	0.489597	0.0883958	0.129419	0.0298197	0.235306	0.0575887	0.145131	0.0666986	0.572708	0.094386	0.486386	0.0673135	0.776808	0.345954	0.0343838	0.102277	0.634778	0.0407061	0.0986251	0.0277597	0.37606	0.74048	0.0405552	0.0857389	0.165291	0.0431692	0.105837	0.0375501
cg06432655	0.5904	0.724635	0.773206	0.315101	0.234784	0.662692	0.145354	0.206637	0.254675	0.46705	0.31619	0.0767675	0.331195	0.842032	0.645165	0.541628	0.78085	0.0924021	0.244131	0.395569	0.250124	0.647345	0.197777	0.758735	0.448143	0.112807	0.394675	0.301798	0.781082	0.749884	0.649767	0.226835	0.577766	0.833456	0.232102	0.523242	0.521606	0.456617	0.152963	0.862656	0.869832	0.428661	0.329817	0.323034	0.157448	0.295614	0.0644004	0.656001	0.701283
cg20881910	0.591799	0.150788	0.0680168	0.418687	0.356143	0.75739	0.0789282	0.0900006	0.144099	0.645653	0.676653	0.398481	0.0842077	0.687641	0.221214	0.0551729	0.862455	0.0954342	0.0749876	0.393517	0.0957575	0.645267	0.0712351	0.0722745	0.753295	0.06725	0.672454	0.0751221	0.453271	0.755987	0.482385	0.0687323	0.251499	0.710449	0.11914	0.0445882	0.0765959	0.0980368	0.157101	0.0565379	0.781082	0.671952	0.74939	0.0556205	0.0362241	0.148081	0.0741921	0.309486	0.711824
cg12188416	0.173215	0.814678	0.883267	0.732032	0.887197	0.186597	0.892844	0.905208	0.436697	0.520968	0.829015	0.71206	0.676906	0.631074	0.877778	0.080887	0.759281	0.438822	0.751078	0.452854	0.638498	0.341624	0.359648	0.838653	0.499889	0.361298	0.190289	0.662607	0.418297	0.743092	0.308992	0.316683	0.832999	0.132295	0.63357	0.756114	0.41101	0.222214	0.159884	0.817949	0.840981	0.443241	0.243885	0.790304	0.823711	0.414031	0.708555	0.679109	0.397089
cg21494776	0.131197	0.724022	0.802632	0.30881	0.700311	0.666313	0.434474	0.308245	0.214876	0.428762	0.196104	0.174422	0.195486	0.821772	0.645911	0.0287567	0.809096	0.0594736	0.0579108	0.518869	0.320216	0.74845	0.674505	0.749199	0.473057	0.180064	0.594215	0.268224	0.845106	0.784825	0.0617098	0.668112	0.597443	0.844404	0.250389	0.242418	0.253876	0.634876	0.0646041	0.65249	0.843032	0.528505	0.40104	0.650223	0.100721	0.0626538	0.0608986	0.135403	0.683023
cg19963797	0.751203	0.724774	0.68831	0.579745	0.427822	0.608654	0.167859	0.0825993	0.437207	0.583635	0.600452	0.601898	0.246425	0.729484	0.663655	0.791045	0.83408	0.0596075	0.299707	0.672208	0.361298	0.099663	0.621457	0.23184	0.667328	0.560023	0.0608237	0.378397	0.136103	0.691987	0.505626	0.0465323	0.155879	0.871563	0.614389	0.290901	0.36028	0.580147	0.243005	0.689693	0.840649	0.192622	0.651595	0.206405	0.693288	0.380612	0.0650923	0.116163	0.539449
cg10885338	0.858756	0.676471	0.846869	0.785228	0.330801	0.574019	0.367022	0.445565	0.3867	0.764396	0.411721	0.926352	0.527395	0.869543	0.942963	0.164403	0.865233	0.86329	0.331763	0.840649	0.627622	0.225246	0.821434	0.433231	0.374028	0.740555	0.339822	0.796484	0.560746	0.679277	0.883754	0.932231	0.635157	0.735835	0.550532	0.586089	0.704742	0.619967	0.308527	0.536517	0.871522	0.968249	0.312153	0.18915	0.451752	0.537721	0.640119	0.896696	0.36671
cg04534765	0.272915	0.216542	0.13148	0.020184	0.111321	0.710055	0.114391	0.0211063	0.107508	0.381633	0.514982	0.363433	0.299628	0.142522	0.776671	0.0684302	0.842079	0.043683	0.0521652	0.646473	0.0510876	0.034258	0.246425	0.0902372	0.0194587	0.184564	0.0591455	0.0790568	0.0929592	0.442406	0.635524	0.192475	0.0166875	0.625505	0.0702248	0.0375652	0.0891703	0.353538	0.111839	0.0456286	0.779547	0.669968	0.534563	0.0175806	0.0364759	0.0995471	0.0370064	0.0992727	0.603692
cg11871280	0.922512	0.441245	0.633115	0.881574	0.606198	0.409197	0.90024	0.893447	0.488376	0.941079	0.571248	0.698225	0.922841	0.893644	0.149553	0.725789	0.291478	0.436892	0.317943	0.822392	0.649767	0.160882	0.880551	0.870987	0.496794	0.88662	0.284917	0.869466	0.57964	0.591202	0.740058	0.677257	0.751472	0.300358	0.508475	0.264766	0.500078	0.557419	0.398265	0.132054	0.245549	0.934207	0.471211	0.346977	0.665083	0.557419	0.238309	0.94102	0.883552
cg22341310	0.0718943	0.751674	0.777935	0.237115	0.764838	0.644621	0.769545	0.826163	0.825085	0.580147	0.108308	0.251754	0.162018	0.844047	0.583139	0.381633	0.661887	0.111425	0.0941568	0.389836	0.0912916	0.483344	0.105596	0.821274	0.891987	0.234118	0.834624	0.17844	0.806917	0.844537	0.667328	0.478118	0.437892	0.850574	0.64881	0.522043	0.148028	0.773206	0.276017	0.854322	0.862577	0.261572	0.76924	0.850034	0.676653	0.172289	0.810441	0.808044	0.518437
cg03874199	0.114542	0.276741	0.702075	0.0767141	0.204624	0.283718	0.511444	0.0284197	0.0437377	0.153733	0.429363	0.278418	0.191952	0.796539	0.590707	0.0307362	0.348323	0.394044	0.607067	0.211598	0.0455225	0.870233	0.0646866	0.562502	0.0257466	0.137757	0.525477	0.072558	0.0850391	0.666749	0.225334	0.447432	0.224811	0.600353	0.263653	0.0556846	0.278051	0.310532	0.077361	0.746719	0.552213	0.41432	0.517787	0.151619	0.0883442	0.0575988	0.305026	0.139395	0.639169
cg10141715	0.278531	0.697187	0.233087	0.504607	0.567142	0.622773	0.581361	0.465843	0.497928	0.144424	0.593221	0.692637	0.211427	0.784079	0.310161	0.629565	0.847741	0.818209	0.115251	0.509312	0.356338	0.768402	0.576536	0.60085	0.15073	0.188241	0.250124	0.263754	0.411114	0.81028	0.666313	0.790644	0.673702	0.850216	0.182838	0.221622	0.279727	0.281835	0.0579692	0.756382	0.703783	0.619793	0.639716	0.442099	0.0782981	0.103922	0.34003	0.309782	0.751333
cg24989962	0.0975877	0.322365	0.678429	0.0974322	0.276741	0.622504	0.0467942	0.0635998	0.151673	0.144467	0.217007	0.457851	0.212832	0.530915	0.676199	0.391775	0.81432	0.0515554	0.220821	0.407639	0.248491	0.0538225	0.61822	0.193059	0.0806969	0.0538619	0.135403	0.225153	0.149731	0.336924	0.209977	0.616208	0.420497	0.199057	0.415759	0.346768	0.186165	0.0502474	0.117193	0.865761	0.692386	0.460329	0.056252	0.0690055	0.098748	0.0802668	0.620262	0.261219	0.379118
cg12876594	0.724192	0.422138	0.271445	0.147141	0.409853	0.818209	0.226921	0.302692	0.523534	0.583347	0.671861	0.117903	0.225246	0.909438	0.672454	0.356524	0.908249	0.582163	0.326689	0.560319	0.198981	0.284257	0.194958	0.33913	0.0767141	0.207347	0.320409	0.461055	0.427082	0.0711156	0.674022	0.264036	0.235057	0.95568	0.219211	0.330801	0.592098	0.27665	0.48481	0.870147	0.0692647	0.606394	0.742176	0.398368	0.138883	0.407253	0.216052	0.82621	0.173282
cg13547644	0.0509275	0.506735	0.0864895	0.0390056	0.0251505	0.513633	0.345845	0.0407287	0.0518542	0.249414	0.114391	0.4209	0.113743	0.160408	0.391775	0.743485	0.328492	0.535365	0.0619128	0.167295	0.0373873	0.11914	0.0423045	0.0350544	0.464319	0.0475891	0.0641158	0.112739	0.0439937	0.906706	0.408558	0.256835	0.0531569	0.0493765	0.42141	0.535673	0.434385	0.0616981	0.0189675	0.290515	0.639169	0.598815	0.239082	0.0392841	0.105738	0.095552	0.0849685	0.271262	0.580637
cg11500797	0.516541	0.158894	0.0747585	0.20422	0.107095	0.707934	0.447852	0.060207	0.201767	0.421721	0.772181	0.408668	0.250718	0.158894	0.0985043	0.49846	0.0977532	0.780101	0.535474	0.46207	0.299796	0.867507	0.222049	0.152622	0.0827765	0.645653	0.0990222	0.220246	0.259281	0.0998254	0.736954	0.508882	0.0753241	0.204382	0.518002	0.256909	0.0947084	0.209183	0.0573952	0.823659	0.225581	0.523048	0.352215	0.467585	0.506836	0.326591	0.621749	0.455969	0.225919
cg23124451	0.141904	0.255517	0.213965	0.601527	0.350168	0.105363	0.348014	0.357946	0.524334	0.114087	0.159884	0.360182	0.269597	0.851422	0.224404	0.180996	0.185893	0.811993	0.21051	0.36713	0.348522	0.886816	0.610276	0.397398	0.81356	0.164403	0.832476	0.216695	0.693526	0.0662239	0.161007	0.396082	0.330217	0.0432146	0.691485	0.452441	0.357747	0.432831	0.477905	0.67021	0.0714557	0.047612	0.571915	0.344325	0.382583	0.599582	0.726629	0.206796	0.141757
cg16708981	0.0388202	0.705472	0.131621	0.0300135	0.0735266	0.543067	0.188816	0.430716	0.143421	0.0443067	0.0211371	0.0257664	0.0800448	0.566545	0.552009	0.0366283	0.743485	0.0989902	0.0313705	0.535574	0.231295	0.905623	0.203663	0.513031	0.0133444	0.29061	0.0394151	0.133743	0.0651347	0.837861	0.129744	0.761953	0.500791	0.650688	0.0735797	0.0658989	0.0862336	0.164202	0.117743	0.0414632	0.640564	0.476143	0.363233	0.084657	0.178121	0.278331	0.0453015	0.493735	0.455969
cg16869108	0.343841	0.306635	0.32513	0.812257	0.813401	0.764902	0.493529	0.200414	0.477602	0.452441	0.330114	0.765846	0.633221	0.926304	0.759595	0.373508	0.231368	0.842309	0.589807	0.433231	0.65617	0.358955	0.289155	0.494048	0.133455	0.501971	0.185599	0.753295	0.287302	0.430294	0.324842	0.165774	0.594122	0.137092	0.829454	0.27403	0.608461	0.850991	0.330801	0.162761	0.206796	0.33031	0.231611	0.311023	0.291003	0.512331	0.567961	0.23618	0.179524
cg21717724	0.794582	0.283438	0.273498	0.568935	0.266625	0.204624	0.528312	0.210131	0.636167	0.61908	0.433845	0.553871	0.797195	0.693364	0.358955	0.375224	0.709844	0.657905	0.176237	0.622303	0.859592	0.811421	0.27928	0.663214	0.307476	0.338318	0.519878	0.646009	0.34636	0.0865844	0.876754	0.17577	0.602663	0.55649	0.856008	0.867674	0.503913	0.453795	0.706904	0.793339	0.187166	0.564642	0.292058	0.222806	0.31529	0.208606	0.644987	0.480196	0.168295
cg04875162	0.419658	0.697118	0.2083	0.410692	0.239082	0.580739	0.505524	0.24175	0.660546	0.3309	0.535887	0.488484	0.16359	0.334379	0.733993	0.653124	0.80958	0.609235	0.532197	0.634778	0.215289	0.516644	0.221787	0.31885	0.648178	0.0952167	0.11378	0.166983	0.76013	0.76924	0.481349	0.714467	0.648716	0.885142	0.183465	0.0620043	0.177562	0.244868	0.125363	0.129744	0.851037	0.489597	0.641371	0.239966	0.423567	0.0504315	0.0735437	0.426574	0.657272
cg18267374	0.0578547	0.649767	0.0539121	0.0927384	0.632189	0.615554	0.031348	0.486386	0.0542408	0.170105	0.532197	0.616788	0.44631	0.565459	0.885184	0.466051	0.744814	0.146444	0.0360869	0.567961	0.134831	0.763009	0.684534	0.266088	0.0143225	0.0242396	0.0659713	0.0696988	0.37332	0.857856	0.376161	0.755864	0.538668	0.503322	0.0777573	0.0263304	0.0330674	0.324939	0.121326	0.756046	0.829767	0.369916	0.258127	0.0356424	0.023109	0.0605872	0.094649	0.125763	0.699656
cg03943081	0.089564	0.0790568	0.196104	0.10145	0.0810324	0.653036	0.360691	0.620957	0.525062	0.49022	0.810851	0.609415	0.11533	0.460523	0.782698	0.580949	0.868587	0.389508	0.737368	0.492215	0.156659	0.519064	0.431785	0.246698	0.343356	0.0834229	0.33873	0.0905891	0.665346	0.803529	0.659812	0.0345824	0.0568231	0.854278	0.583444	0.0342965	0.120487	0.372198	0.227153	0.0692647	0.720469	0.63013	0.467253	0.203947	0.0462469	0.0673294	0.249859	0.61458	0.728771
cg12100791	0.16879	0.482701	0.741281	0.690818	0.730121	0.0861298	0.62798	0.882112	0.259831	0.134592	0.242757	0.705235	0.423995	0.832523	0.779547	0.219851	0.568564	0.765155	0.447336	0.311678	0.547897	0.887882	0.464107	0.734888	0.813663	0.388781	0.815911	0.19298	0.792949	0.500393	0.120742	0.478535	0.377497	0.861142	0.719473	0.654204	0.225581	0.666568	0.234026	0.633021	0.836778	0.184217	0.253876	0.286531	0.48481	0.239451	0.863029	0.292249	0.145534
cg12006284	0.828633	0.764396	0.781492	0.281294	0.155405	0.769164	0.247136	0.667925	0.182157	0.862656	0.460231	0.231763	0.419123	0.841934	0.665621	0.168732	0.834522	0.382882	0.403664	0.71917	0.318654	0.24739	0.344418	0.861498	0.913336	0.511722	0.537232	0.39479	0.382172	0.911813	0.817599	0.615262	0.619496	0.88662	0.357117	0.351933	0.250389	0.812407	0.290801	0.774207	0.917615	0.810949	0.53702	0.279007	0.344033	0.412998	0.846535	0.882748	0.867307
cg14893161	0.615907	0.578255	0.454833	0.851986	0.913384	0.270443	0.664192	0.649686	0.917071	0.631177	0.674424	0.50381	0.185381	0.927656	0.742582	0.690991	0.522624	0.564749	0.689853	0.348947	0.0881465	0.725501	0.908201	0.840934	0.645562	0.544687	0.906332	0.230653	0.82666	0.841073	0.549513	0.548807	0.590499	0.629565	0.602663	0.535887	0.62919	0.463384	0.708713	0.802904	0.851291	0.325805	0.953887	0.882465	0.613631	0.636063	0.914772	0.906794	0.729338
cg21032583	0.920783	0.449669	0.296865	0.884046	0.265123	0.408889	0.3034	0.550127	0.48764	0.873987	0.429875	0.867592	0.915034	0.900421	0.873733	0.392718	0.492112	0.293659	0.195045	0.64717	0.873574	0.331763	0.886697	0.516323	0.452441	0.895607	0.608461	0.883511	0.212358	0.549312	0.918865	0.767945	0.651953	0.284439	0.301319	0.373618	0.687309	0.87127	0.482179	0.146054	0.303958	0.887314	0.577859	0.311386	0.422725	0.316572	0.86644	0.867754	0.334789
cg14785479	0.0640348	0.06346	0.151022	0.0501972	0.100749	0.662875	0.0382235	0.0520898	0.192174	0.10145	0.126167	0.0286089	0.20283	0.860192	0.160289	0.10478	0.0849205	0.0236286	0.114786	0.110334	0.0350181	0.888451	0.21128	0.0549142	0.0176214	0.021623	0.118189	0.0490341	0.148408	0.0343054	0.0510261	0.0374588	0.0255751	0.887109	0.441341	0.107716	0.0677245	0.0346266	0.023666	0.426154	0.068716	0.744182	0.195885	0.0197178	0.0455297	0.0865596	0.0165887	0.0751737	0.0631819
cg04970352	0.126877	0.0764576	0.33244	0.0520078	0.157743	0.0554962	0.0606246	0.0778848	0.11041	0.259107	0.0692495	0.179928	0.0844988	0.0448454	0.850334	0.063814	0.0452007	0.127669	0.028426	0.610089	0.228254	0.0590491	0.0405315	0.261932	0.13282	0.146005	0.0475727	0.291761	0.0735266	0.0499698	0.0765959	0.0849685	0.06066	0.0514147	0.0706754	0.036697	0.122277	0.0583295	0.0354556	0.254675	0.0571356	0.085715	0.0527121	0.112879	0.0853858	0.292536	0.888691	0.412483	0.0731799
cg07693270	0.51243	0.215204	0.131197	0.351072	0.165233	0.13157	0.202445	0.0569662	0.221787	0.748219	0.101128	0.547105	0.250208	0.941911	0.610567	0.0460892	0.102176	0.133592	0.153841	0.550532	0.29543	0.109352	0.828247	0.27824	0.0371552	0.277961	0.068001	0.350168	0.118189	0.663214	0.273391	0.470891	0.42946	0.665886	0.172158	0.117029	0.141535	0.716443	0.128815	0.0488233	0.704408	0.730887	0.385481	0.142321	0.146159	0.176578	0.83092	0.581248	0.568366
cg03214697	0.0904009	0.129881	0.0779043	0.122834	0.0926108	0.0962861	0.0856717	0.0720467	0.112439	0.0661015	0.0604508	0.595012	0.0908536	0.0700767	0.0558201	0.140709	0.0578547	0.0470828	0.0858087	0.133411	0.126381	0.736694	0.0903716	0.124994	0.185893	0.163185	0.446207	0.144632	0.069087	0.0708795	0.0819049	0.834381	0.0578547	0.0443067	0.190645	0.637397	0.148639	0.0564436	0.17004	0.613934	0.0932771	0.0840674	0.0600837	0.181204	0.0818122	0.08975	0.79133	0.106619	0.125079
cg02335804	0.0327519	0.0526266	0.265828	0.0362428	0.0499359	0.0302974	0.0741723	0.560225	0.053666	0.178714	0.0337381	0.0368792	0.0672344	0.0314138	0.0294082	0.793004	0.0461033	0.0280643	0.0256096	0.0520273	0.0438807	0.642346	0.483446	0.551336	0.784394	0.0540227	0.286721	0.0342833	0.0281862	0.0378544	0.0310307	0.158368	0.0283107	0.033043	0.0719127	0.157398	0.113853	0.258215	0.783122	0.708713	0.0349942	0.0441474	0.164581	0.454833	0.0357862	0.0270278	0.738165	0.0461393	0.53039
cg12265829	0.518657	0.505424	0.0325439	0.0289343	0.610567	0.469846	0.0305357	0.0572841	0.0545576	0.0250481	0.0510068	0.0320448	0.151395	0.780417	0.0429418	0.0344637	0.7857	0.0240231	0.0397582	0.348634	0.0642856	0.0398133	0.140198	0.193207	0.748065	0.023689	0.0389331	0.0607764	0.41688	0.0251164	0.290901	0.270801	0.583045	0.693526	0.122876	0.0323341	0.0619903	0.589312	0.0467078	0.0961085	0.733531	0.0859601	0.34003	0.0797521	0.0353829	0.0408461	0.463585	0.757259	0.0318255
cg03606258	0.784695	0.764073	0.954093	0.66666	0.0289013	0.830055	0.715356	0.698001	0.0381702	0.812407	0.793392	0.605252	0.691747	0.326413	0.929223	0.79266	0.979253	0.802581	0.713149	0.869665	0.660271	0.736624	0.679187	0.818743	0.664102	0.789223	0.9863	0.791631	0.48918	0.982148	0.710516	0.772946	0.802686	0.954825	0.585414	0.702291	0.974336	0.55868	0.786078	0.766049	0.764202	0.749261	0.860235	0.0176945	0.610371	0.686567	0.890227	0.737368	0.0418015
cg01152019	0.75397	0.650966	0.669172	0.452754	0.188741	0.709844	0.113743	0.312756	0.716298	0.594023	0.849398	0.09164	0.890531	0.850421	0.398783	0.594306	0.522732	0.174755	0.808149	0.627897	0.337331	0.0879435	0.630674	0.782818	0.407455	0.499152	0.159016	0.504914	0.528705	0.92101	0.641898	0.865151	0.365327	0.866177	0.703392	0.818499	0.437097	0.0341186	0.874181	0.817034	0.470367	0.784996	0.642447	0.159016	0.872946	0.75035	0.354275	0.378701	0.367759
cg22619018	0.0773808	0.134543	0.0231903	0.0538916	0.0502474	0.750951	0.0460579	0.0198571	0.0397006	0.0421473	0.0964536	0.122748	0.186165	0.0456497	0.669534	0.0448931	0.957774	0.0392571	0.0382598	0.197606	0.0247143	0.709443	0.0318485	0.0325833	0.0166765	0.0368527	0.0327688	0.0421592	0.0654034	0.0196803	0.416673	0.0912053	0.00915298	0.0192917	0.0534398	0.0177963	0.0618238	0.0253596	0.104505	0.0318087	0.0220062	0.762891	0.16609	0.0237226	0.0195056	0.0831238	0.148639	0.0557058	0.0307705
cg25802093	0.386284	0.592284	0.857276	0.593531	0.476038	0.682178	0.599026	0.586198	0.67551	0.709681	0.85693	0.875948	0.186516	0.899778	0.569318	0.868742	0.537827	0.824124	0.580834	0.421114	0.316013	0.874745	0.638784	0.477798	0.0735092	0.333111	0.888734	0.26202	0.849219	0.51726	0.639628	0.553871	0.652228	0.954093	0.831961	0.180255	0.0722412	0.923501	0.239451	0.914072	0.83598	0.715204	0.672289	0.521078	0.531987	0.47006	0.204382	0.18915	0.748851
cg18338296	0.940662	0.959986	0.968975	0.386391	0.318033	0.960067	0.386089	0.539169	0.706904	0.935835	0.344834	0.306187	0.534448	0.95268	0.935943	0.159998	0.929974	0.935072	0.522043	0.943582	0.505626	0.949915	0.608366	0.409527	0.952432	0.889737	0.861537	0.890184	0.934571	0.387659	0.956452	0.372927	0.970096	0.959318	0.824273	0.162319	0.825657	0.946468	0.383825	0.804804	0.962304	0.94414	0.642536	0.393633	0.382172	0.95755	0.960392	0.957467	0.929825
cg19988449	0.306331	0.222214	0.210353	0.0689737	0.0668959	0.659015	0.124564	0.0522019	0.0796281	0.117779	0.184086	0.515804	0.0545983	0.60961	0.854996	0.0762237	0.739921	0.528103	0.132618	0.375224	0.0440592	0.0579918	0.0433429	0.0383168	0.0241455	0.053529	0.0986556	0.074569	0.112807	0.648178	0.196617	0.101975	0.458782	0.771793	0.0564201	0.0424328	0.0440198	0.101975	0.0530042	0.0420059	0.87237	0.570425	0.0663664	0.0620182	0.0713358	0.0958766	0.0549365	0.411825	0.0819945
cg23555120	0.109189	0.110334	0.106222	0.0566216	0.682348	0.109933	0.669803	0.120022	0.570425	0.174755	0.814114	0.770001	0.450121	0.79133	0.158179	0.293659	0.205889	0.674109	0.765718	0.0956385	0.0826226	0.473689	0.0734	0.164648	0.0871835	0.0846792	0.121285	0.212285	0.0930777	0.499589	0.392621	0.046154	0.119946	0.0620182	0.640663	0.0883958	0.680771	0.641811	0.128453	0.0651071	0.858077	0.0978739	0.629652	0.752279	0.530283	0.516644	0.137807	0.0811702	0.10608
cg15748507	0.730511	0.76379	0.235753	0.0924775	0.753229	0.775965	0.678842	0.542768	0.750291	0.752833	0.878906	0.82621	0.515804	0.682256	0.819919	0.938909	0.885648	0.5904	0.628081	0.527608	0.343165	0.858286	0.591102	0.683177	0.83945	0.195885	0.785893	0.355069	0.770515	0.872861	0.790245	0.689853	0.692727	0.914988	0.572904	0.461976	0.264865	0.343447	0.45618	0.142321	0.723415	0.723178	0.870108	0.553652	0.130066	0.769936	0.498145	0.756382	0.786019
cg22449114	0.377983	0.453372	0.642734	0.110738	0.776221	0.507355	0.611714	0.173886	0.788339	0.552437	0.534563	0.575925	0.173354	0.865761	0.341246	0.0481631	0.715744	0.222645	0.489821	0.343356	0.339722	0.790245	0.514766	0.213231	0.0583036	0.172926	0.674662	0.231447	0.277668	0.819257	0.29234	0.825196	0.261387	0.90369	0.586413	0.646108	0.482276	0.620262	0.0919336	0.0856717	0.256038	0.612857	0.441341	0.500299	0.712684	0.793912	0.25831	0.130406	0.451449
cg18074297	0.387659	0.607358	0.758735	0.451653	0.547803	0.414726	0.694446	0.856978	0.110041	0.792492	0.713781	0.892416	0.519064	0.550215	0.176099	0.497821	0.123139	0.207916	0.222975	0.663214	0.489394	0.892116	0.695109	0.795475	0.821434	0.67751	0.829551	0.0437766	0.144156	0.898102	0.802421	0.920315	0.11067	0.727901	0.771478	0.396598	0.0380835	0.892151	0.153623	0.853672	0.87426	0.747995	0.458894	0.610761	0.727018	0.764592	0.837011	0.666568	0.922469
cg12259256	0.0178476	0.10263	0.0328263	0.0621207	0.0333138	0.502614	0.0743382	0.0233616	0.567666	0.0278709	0.074569	0.0367063	0.0392405	0.692232	0.0534213	0.0657387	0.473274	0.116142	0.0834892	0.165662	0.0303148	0.0301758	0.0408588	0.579745	0.0974631	0.0563443	0.153733	0.042789	0.058098	0.222734	0.0274394	0.0358834	0.0850898	0.732536	0.458361	0.0211186	0.0403236	0.88912	0.0422513	0.840797	0.751203	0.0262949	0.269053	0.0778421	0.0414095	0.0660461	0.822992	0.0352197	0.257438
cg16404106	0.240199	0.600737	0.669014	0.218807	0.664724	0.595424	0.533574	0.299171	0.145077	0.120116	0.500791	0.714396	0.136003	0.581973	0.862861	0.0492683	0.606878	0.10895	0.79879	0.197378	0.341724	0.516541	0.514261	0.844404	0.0392194	0.0886259	0.167541	0.189079	0.162381	0.65213	0.101229	0.351257	0.540561	0.409527	0.33292	0.475928	0.216143	0.185381	0.254574	0.569397	0.75364	0.0955805	0.234963	0.512924	0.144739	0.145131	0.777876	0.465943	0.255862
cg03963198	0.0721473	0.68814	0.0444989	0.0691648	0.131723	0.712847	0.0851907	0.0821968	0.139689	0.34153	0.0501885	0.624762	0.421005	0.494367	0.525477	0.0598757	0.696091	0.115645	0.071353	0.592569	0.102721	0.0282252	0.139998	0.708092	0.0172403	0.0485592	0.0934148	0.113551	0.15257	0.78048	0.378796	0.0313811	0.638784	0.0398589	0.0894817	0.0487529	0.0952865	0.0300064	0.058758	0.0499359	0.0205636	0.632654	0.0608237	0.136103	0.0251559	0.0943577	0.0271924	0.120574	0.703625
cg15528736	0.0683019	0.309295	0.0446725	0.545563	0.810607	0.0470599	0.187166	0.495322	0.23184	0.0679552	0.560517	0.363532	0.0608493	0.384865	0.0251737	0.0956961	0.208072	0.640471	0.46158	0.263372	0.227078	0.775401	0.117387	0.494658	0.284076	0.153071	0.621552	0.188458	0.607641	0.774786	0.0673931	0.0248692	0.173759	0.0179196	0.701603	0.59492	0.649423	0.0342028	0.621932	0.643794	0.0508756	0.0384713	0.569603	0.589807	0.602944	0.62732	0.195045	0.11491	0.229056
cg11108890	0.131335	0.65213	0.661717	0.257182	0.682851	0.614294	0.619594	0.50381	0.646554	0.455038	0.825039	0.0866602	0.227481	0.621057	0.635437	0.206174	0.729484	0.66883	0.70531	0.541206	0.0857389	0.704256	0.0908536	0.782765	0.772181	0.358359	0.715134	0.275549	0.728982	0.694703	0.0741526	0.694527	0.51118	0.848045	0.561794	0.700311	0.63145	0.759736	0.156352	0.831961	0.80719	0.142221	0.650966	0.766953	0.629388	0.661266	0.717407	0.219851	0.643983
cg18236477	0.163122	0.574837	0.624871	0.376161	0.193136	0.667165	0.0718784	0.584622	0.141699	0.415556	0.844182	0.792377	0.493638	0.783122	0.796484	0.662243	0.81729	0.0982871	0.192543	0.628443	0.512331	0.810607	0.724635	0.783532	0.209893	0.209724	0.675606	0.262281	0.72633	0.815086	0.674578	0.592759	0.659015	0.839052	0.151722	0.162195	0.139035	0.537617	0.0947084	0.790364	0.855698	0.598005	0.868304	0.474259	0.547105	0.77434	0.0546384	0.663122	0.718564
cg16254309	0.424391	0.387338	0.217991	0.136157	0.0584335	0.589898	0.137152	0.0755316	0.0946759	0.103986	0.68872	0.172618	0.186103	0.627716	0.175029	0.096677	0.766708	0.491517	0.0979725	0.185243	0.179858	0.747581	0.236693	0.079439	0.841212	0.0557493	0.722145	0.109896	0.659619	0.743007	0.494465	0.114316	0.419237	0.763143	0.439243	0.512924	0.0930777	0.474905	0.0800255	0.109018	0.789908	0.477502	0.223993	0.101784	0.199286	0.254574	0.0766732	0.11889	0.0701755
cg12374721	0.613631	0.714985	0.740414	0.157991	0.513231	0.591993	0.392824	0.158485	0.578145	0.154675	0.749199	0.280926	0.230728	0.820974	0.396495	0.94261	0.763928	0.0493572	0.410302	0.459104	0.613934	0.760065	0.447153	0.69395	0.886445	0.0606004	0.651762	0.138883	0.530283	0.825609	0.0979725	0.795111	0.409527	0.810607	0.602366	0.405808	0.124387	0.507457	0.563006	0.931771	0.84161	0.562502	0.817135	0.145354	0.520583	0.26698	0.583347	0.710898	0.625045
cg11052143	0.335118	0.321119	0.55542	0.366807	0.866734	0.602103	0.459297	0.0761049	0.231696	0.491913	0.12426	0.732032	0.0840674	0.0488699	0.740907	0.632361	0.659724	0.423162	0.11041	0.232758	0.478317	0.793453	0.354872	0.761563	0.488178	0.16879	0.0906924	0.303589	0.582721	0.418499	0.106561	0.11085	0.638138	0.349168	0.10244	0.752128	0.566746	0.820035	0.179524	0.541098	0.835414	0.4093	0.043608	0.488587	0.286908	0.396713	0.799976	0.443982	0.575034
cg01839464	0.0655175	0.642734	0.33893	0.0315711	0.099663	0.638405	0.0388151	0.0529166	0.108984	0.117823	0.792492	0.0260677	0.145354	0.15751	0.394044	0.0672974	0.720702	0.0319798	0.0332931	0.517489	0.12426	0.731517	0.0711832	0.271919	0.119868	0.0273417	0.0842779	0.126082	0.193059	0.104282	0.428878	0.375447	0.53907	0.866864	0.12443	0.0519039	0.108705	0.0407718	0.101005	0.128225	0.855746	0.0749126	0.664567	0.047612	0.528103	0.050947	0.0421473	0.140807	0.597157
cg02630207	0.828966	0.850991	0.395004	0.256656	0.243625	0.823178	0.221214	0.343063	0.358557	0.908471	0.357424	0.148081	0.326209	0.0963803	0.85613	0.075703	0.580834	0.396806	0.268031	0.718644	0.35955	0.134491	0.296865	0.345447	0.708018	0.649163	0.196328	0.845379	0.359057	0.791275	0.81655	0.137152	0.764838	0.364056	0.23927	0.182767	0.298881	0.882347	0.30881	0.314222	0.595521	0.888652	0.271349	0.340122	0.317169	0.348014	0.611808	0.837062	0.890102
cg04378886	0.0766162	0.10867	0.0553343	0.0820823	0.115601	0.0760472	0.176578	0.165291	0.195045	0.118023	0.139353	0.236442	0.0980682	0.897115	0.0443722	0.100586	0.0766162	0.0789478	0.125994	0.228812	0.0498363	0.722382	0.0948251	0.0887232	0.0422386	0.131813	0.0418685	0.104605	0.084322	0.0341854	0.632561	0.185455	0.666916	0.0583396	0.141328	0.114427	0.136056	0.580442	0.170172	0.0727346	0.0720794	0.743007	0.331677	0.102346	0.0410618	0.0723442	0.900932	0.140356	0.205282
cg13323752	0.306821	0.209496	0.521078	0.29234	0.127072	0.509197	0.301121	0.24538	0.0136176	0.276274	0.0868872	0.358754	0.0925076	0.614037	0.367963	0.508475	0.433845	0.0441875	0.107936	0.213965	0.0746261	0.589501	0.0893262	0.0922882	0.0280847	0.0554561	0.488587	0.0189212	0.798446	0.586888	0.428762	0.380294	0.262472	0.385795	0.566343	0.471307	0.023057	0.331571	0.0198083	0.545282	0.786687	0.426254	0.449363	0.660363	0.0132358	0.0678118	0.67751	0.328709	0.545175
cg14399060	0.756907	0.599772	0.67326	0.270885	0.0972488	0.701201	0.116946	0.173354	0.626153	0.423567	0.831524	0.0676184	0.670394	0.830776	0.691067	0.499589	0.525477	0.140606	0.815754	0.419658	0.206948	0.0688326	0.581248	0.757724	0.196992	0.381734	0.119547	0.435585	0.542149	0.907737	0.578727	0.71082	0.454083	0.868503	0.563298	0.763009	0.276097	0.0300277	0.858286	0.766505	0.198619	0.686495	0.639628	0.197871	0.835461	0.546182	0.362092	0.397501	0.253076
cg20083676	0.651326	0.18915	0.206637	0.747072	0.755005	0.0990528	0.48481	0.339722	0.253702	0.383825	0.34636	0.720332	0.341724	0.790877	0.48481	0.2001	0.178848	0.147025	0.34153	0.27007	0.662607	0.72492	0.672711	0.236867	0.235654	0.349568	0.25533	0.262735	0.205357	0.184772	0.688974	0.585139	0.113624	0.756046	0.175092	0.254045	0.393027	0.733769	0.255694	0.581459	0.842495	0.521511	0.638978	0.224992	0.355069	0.150969	0.673941	0.733993	0.250639
cg26416466	0.194567	0.467253	0.426154	0.0324565	0.336108	0.404485	0.487129	0.0743734	0.364918	0.374126	0.0413523	0.229791	0.0301179	0.704742	0.407834	0.425139	0.38869	0.0764391	0.452255	0.193842	0.0858087	0.691395	0.0495858	0.25629	0.872606	0.0154151	0.685906	0.0155626	0.568467	0.749612	0.0262276	0.677429	0.260198	0.5904	0.449669	0.538468	0.0697485	0.357424	0.0289512	0.71917	0.534257	0.189804	0.185112	0.306635	0.196548	0.0786017	0.797613	0.3831	0.493327
cg15674997	0.312242	0.656812	0.307189	0.152293	0.183395	0.691908	0.757325	0.0863896	0.721302	0.201534	0.224485	0.719804	0.537334	0.672626	0.739857	0.0490013	0.488862	0.813608	0.175702	0.456827	0.233501	0.691908	0.325313	0.674908	0.0255778	0.234283	0.179117	0.293457	0.100393	0.780417	0.571915	0.47058	0.451952	0.778481	0.266721	0.242142	0.204088	0.585608	0.264486	0.160181	0.774655	0.490399	0.461055	0.25629	0.16572	0.143171	0.0218432	0.723563	0.577859
cg14859460	0.178989	0.706506	0.0409562	0.0903716	0.0719127	0.63692	0.107716	0.0319683	0.376784	0.320602	0.0963507	0.628634	0.113309	0.18107	0.663392	0.0222514	0.77628	0.337728	0.16912	0.367022	0.142321	0.820877	0.11487	0.133411	0.3725	0.0222889	0.560746	0.16359	0.311771	0.819458	0.508772	0.0717229	0.602944	0.715659	0.276371	0.312951	0.0901059	0.0672344	0.0591566	0.425247	0.782204	0.616114	0.492635	0.06771	0.130649	0.0706592	0.0770466	0.213151	0.709291
cg09260089	0.03231	0.506436	0.612287	0.0201179	0.0410559	0.663745	0.243885	0.0193897	0.0839526	0.0343103	0.0619128	0.326209	0.0628297	0.674991	0.827202	0.0312138	0.780674	0.568836	0.0214526	0.403458	0.0406183	0.497607	0.0754747	0.055957	0.0194248	0.0321208	0.0388367	0.0607244	0.0808444	0.571744	0.0255032	0.0497359	0.404587	0.811317	0.0328654	0.0423635	0.0577024	0.0521839	0.0242541	0.0286189	0.845197	0.04109	0.0262765	0.0274731	0.0365175	0.067664	0.0196473	0.0593915	0.718116
cg10722799	0.426793	0.540154	0.746586	0.422486	0.249588	0.504914	0.808781	0.697276	0.136103	0.690991	0.623159	0.689215	0.54731	0.527709	0.157991	0.570734	0.141484	0.228812	0.185528	0.603692	0.427502	0.842589	0.558803	0.780608	0.707068	0.685494	0.74524	0.0650642	0.269136	0.847741	0.718564	0.747856	0.116213	0.744742	0.782021	0.30199	0.0529259	0.840238	0.21213	0.84515	0.836089	0.608848	0.551119	0.592671	0.737015	0.756382	0.827845	0.592473	0.910763
cg11525285	0.105101	0.189875	0.0991796	0.490018	0.378397	0.711054	0.563006	0.206796	0.182976	0.285785	0.51759	0.14814	0.135898	0.685011	0.126427	0.74511	0.800095	0.259923	0.598606	0.457654	0.183751	0.832767	0.161127	0.314995	0.592569	0.164525	0.284723	0.124472	0.410692	0.791981	0.399695	0.844316	0.354872	0.559119	0.281294	0.504001	0.11662	0.181276	0.107863	0.690738	0.840934	0.53702	0.690914	0.121635	0.461883	0.112628	0.183947	0.140911	0.664384
cg23563234	0.267426	0.173759	0.563205	0.311279	0.0690244	0.0874917	0.433128	0.843032	0.0683341	0.466051	0.0852175	0.225334	0.149553	0.358847	0.650318	0.56115	0.723867	0.0471527	0.101918	0.331677	0.262119	0.526897	0.285207	0.530915	0.654378	0.239633	0.767607	0.155707	0.337633	0.189804	0.35418	0.273391	0.449163	0.35517	0.0523759	0.0781131	0.0989286	0.54387	0.0615196	0.654378	0.743902	0.533854	0.411721	0.251582	0.0837181	0.0566427	0.765589	0.458782	0.325406
cg26550234	0.843273	0.674821	0.301319	0.83486	0.617553	0.766049	0.846449	0.242668	0.603227	0.87237	0.308764	0.88662	0.828092	0.135951	0.861581	0.20398	0.630216	0.820727	0.891059	0.770188	0.720634	0.124738	0.643705	0.334379	0.711209	0.703392	0.303589	0.862455	0.281294	0.417714	0.769366	0.48039	0.681115	0.744543	0.448437	0.444503	0.764468	0.750478	0.383738	0.327007	0.125853	0.685011	0.505019	0.306733	0.43113	0.366234	0.684363	0.444301	0.837242
cg07104706	0.0808014	0.580056	0.55639	0.101598	0.0917206	0.467682	0.0514147	0.0670217	0.378796	0.161901	0.121635	0.0772262	0.04762	0.560023	0.834576	0.586308	0.597723	0.65322	0.047651	0.18169	0.140807	0.418906	0.0549041	0.0162367	0.869466	0.0222337	0.0319602	0.0691023	0.0274791	0.795289	0.359975	0.337824	0.324346	0.782138	0.0354556	0.0239722	0.0465688	0.456508	0.0284163	0.188953	0.769044	0.129652	0.440097	0.0556517	0.138323	0.0833995	0.0191796	0.0827273	0.496407
cg08832227	0.122451	0.738237	0.830152	0.242072	0.613631	0.728623	0.935943	0.898513	0.619692	0.378295	0.649599	0.827988	0.247971	0.885061	0.816698	0.95892	0.900642	0.516752	0.46207	0.478848	0.257002	0.830199	0.710449	0.807775	0.564946	0.158724	0.90052	0.448862	0.847696	0.904432	0.69412	0.599582	0.753295	0.888967	0.762828	0.410787	0.575629	0.766643	0.508581	0.925582	0.903816	0.666129	0.896696	0.437784	0.752689	0.918865	0.911296	0.804474	0.761624
cg14696870	0.647443	0.837573	0.349271	0.777935	0.490597	0.153179	0.907911	0.23184	0.573818	0.560847	0.271349	0.888003	0.682777	0.301505	0.151336	0.0947403	0.227153	0.763207	0.735604	0.650688	0.573504	0.113436	0.886777	0.294228	0.337633	0.615355	0.313458	0.780608	0.162513	0.297339	0.569795	0.68831	0.504206	0.203216	0.458579	0.214657	0.399479	0.411313	0.30757	0.164777	0.0918536	0.393633	0.329508	0.210988	0.391775	0.345447	0.111987	0.475014	0.840284
cg25119415	0.724405	0.368376	0.463326	0.538768	0.280307	0.212045	0.605429	0.379118	0.247723	0.75535	0.414231	0.93139	0.88861	0.120574	0.322657	0.745574	0.28252	0.469546	0.869748	0.601433	0.72349	0.158303	0.612483	0.357008	0.482075	0.854741	0.133933	0.680078	0.581652	0.884333	0.550621	0.467361	0.793797	0.260281	0.633754	0.267586	0.788632	0.627622	0.472752	0.187402	0.0919651	0.662345	0.658546	0.309782	0.441042	0.405554	0.124606	0.26923	0.48481
cg14144305	0.186376	0.217414	0.638055	0.0514224	0.566146	0.584928	0.282118	0.0763593	0.557807	0.170357	0.626839	0.319456	0.0840436	0.725058	0.390446	0.125032	0.311488	0.547996	0.170937	0.315909	0.0509378	0.755141	0.634684	0.216052	0.255694	0.204088	0.0887777	0.574628	0.0465616	0.426574	0.174486	0.49384	0.173354	0.222564	0.407349	0.0753427	0.117981	0.861621	0.0445191	0.895029	0.608755	0.0681582	0.575329	0.227233	0.346868	0.589312	0.82737	0.194417	0.529023
cg07080946	0.819307	0.426254	0.34153	0.690914	0.256909	0.504661	0.65709	0.333017	0.323544	0.809256	0.232102	0.782441	0.813511	0.192698	0.826853	0.491711	0.207267	0.733919	0.373825	0.580231	0.835187	0.165532	0.873697	0.193842	0.280661	0.757992	0.577465	0.762233	0.374615	0.539449	0.842969	0.701836	0.884937	0.774463	0.870278	0.835506	0.750951	0.4106	0.520473	0.183785	0.350974	0.705551	0.300736	0.387134	0.330114	0.454942	0.201173	0.783532	0.3623
cg14918082	0.612578	0.803529	0.82197	0.138575	0.938087	0.244215	0.252025	0.850461	0.918775	0.600353	0.927973	0.810219	0.168233	0.870278	0.782082	0.938804	0.941308	0.347392	0.771993	0.585796	0.230897	0.1167	0.513741	0.843771	0.821274	0.223838	0.79902	0.704821	0.866647	0.879729	0.572309	0.899121	0.898513	0.828293	0.892455	0.896497	0.480196	0.94469	0.633115	0.958018	0.868219	0.491406	0.464319	0.91512	0.727322	0.902746	0.885929	0.638883	0.578727
cg08256781	0.91973	0.357117	0.79121	0.439749	0.356243	0.892373	0.616899	0.693445	0.578346	0.906287	0.51097	0.916628	0.897238	0.494465	0.24789	0.222389	0.486386	0.884171	0.237208	0.867973	0.543462	0.237632	0.458361	0.336108	0.794482	0.686567	0.744049	0.818351	0.442601	0.83327	0.934959	0.455334	0.756046	0.16641	0.372927	0.366136	0.477905	0.588437	0.301713	0.329118	0.18768	0.88861	0.339226	0.766643	0.54387	0.4204	0.908515	0.906665	0.399811
cg08450982	0.701603	0.768802	0.395279	0.680938	0.416183	0.863512	0.33903	0.207916	0.634141	0.599114	0.231208	0.790188	0.555998	0.91296	0.825561	0.61582	0.87203	0.572806	0.40489	0.638784	0.569221	0.812522	0.833796	0.277319	0.159376	0.328599	0.27403	0.550914	0.526799	0.764396	0.746932	0.200661	0.841303	0.891453	0.513953	0.313249	0.461162	0.635972	0.447039	0.150969	0.693445	0.595424	0.490399	0.331952	0.299348	0.756182	0.0341019	0.743902	0.580949
cg16106497	0.866223	0.879764	0.600452	0.716443	0.917518	0.170297	0.935252	0.670976	0.353538	0.333604	0.650132	0.406825	0.811885	0.919827	0.845288	0.409092	0.792607	0.793339	0.847414	0.656543	0.626074	0.499046	0.706434	0.786148	0.814678	0.624112	0.95232	0.848364	0.278418	0.861756	0.705878	0.512537	0.933685	0.548101	0.898513	0.585796	0.764838	0.203216	0.843133	0.713374	0.683767	0.794995	0.855967	0.959079	0.900642	0.825657	0.8992	0.783396	0.838653
cg17298704	0.5559	0.640663	0.248873	0.73866	0.948645	0.799138	0.951618	0.919827	0.381308	0.408354	0.489821	0.947984	0.946961	0.878519	0.770906	0.584015	0.408255	0.614973	0.931816	0.750021	0.931341	0.421926	0.717574	0.402325	0.793339	0.81941	0.923547	0.926678	0.817239	0.953959	0.337633	0.718725	0.614881	0.593429	0.722223	0.87782	0.874508	0.916725	0.707151	0.129371	0.323234	0.348634	0.375557	0.70221	0.803819	0.604395	0.784574	0.27758	0.907694
cg10895543	0.185312	0.35517	0.450734	0.126034	0.461883	0.413301	0.520689	0.0939617	0.67237	0.380391	0.837907	0.585034	0.250124	0.722382	0.674662	0.502297	0.457851	0.583139	0.246255	0.179928	0.217414	0.687476	0.089143	0.791684	0.820974	0.199428	0.0964957	0.103523	0.395974	0.535168	0.297543	0.437998	0.113481	0.327513	0.417414	0.632561	0.0729404	0.782578	0.81028	0.892571	0.827753	0.0945846	0.827	0.745834	0.727901	0.341838	0.738946	0.561474	0.655568
cg10280342	0.304737	0.456293	0.679016	0.629747	0.402436	0.720179	0.744742	0.519878	0.743617	0.260462	0.150389	0.172221	0.309295	0.810115	0.762361	0.46504	0.669094	0.751402	0.172419	0.460329	0.515204	0.777558	0.484291	0.800258	0.814467	0.224641	0.708796	0.506932	0.821027	0.407549	0.303685	0.432234	0.841253	0.684534	0.601527	0.227078	0.805829	0.817239	0.442302	0.317542	0.114391	0.0928237	0.399695	0.267683	0.443349	0.675337	0.149087	0.271445	0.0977252
cg00332153	0.685101	0.442302	0.153179	0.650318	0.12368	0.175958	0.730887	0.661266	0.120825	0.731738	0.215204	0.87915	0.564536	0.196918	0.221378	0.774397	0.326897	0.459104	0.802203	0.347177	0.506244	0.665886	0.150389	0.420698	0.194649	0.530708	0.731449	0.24372	0.700058	0.251844	0.310837	0.342583	0.189439	0.336334	0.692727	0.765411	0.248601	0.839011	0.212207	0.894412	0.347287	0.346156	0.398481	0.229295	0.318654	0.221132	0.313544	0.276741	0.473274
cg07601320	0.343743	0.591504	0.619179	0.555725	0.571447	0.255427	0.116252	0.217991	0.678842	0.0814799	0.802032	0.346977	0.412032	0.0615324	0.11067	0.252282	0.686415	0.477188	0.768469	0.417905	0.196328	0.579745	0.192318	0.764722	0.461055	0.168732	0.116488	0.201992	0.169053	0.384865	0.328909	0.796841	0.280751	0.0624343	0.15073	0.751934	0.184433	0.539657	0.689533	0.203733	0.0800654	0.0798523	0.691827	0.625591	0.517907	0.294401	0.738371	0.100973	0.0954675
cg14832904	0.71432	0.801201	0.881365	0.272915	0.542552	0.820333	0.502089	0.869665	0.695772	0.465143	0.338823	0.0942656	0.288104	0.88347	0.82666	0.225669	0.910851	0.439983	0.428969	0.695846	0.196474	0.602663	0.549716	0.884333	0.112553	0.277038	0.633398	0.586697	0.590994	0.835752	0.736195	0.199137	0.885318	0.727542	0.467784	0.725209	0.802527	0.223244	0.564536	0.870233	0.902499	0.439643	0.684689	0.924832	0.372099	0.823417	0.699097	0.801808	0.788002
cg13954292	0.680856	0.838198	0.373027	0.630674	0.372718	0.904883	0.443019	0.469344	0.765589	0.838002	0.520968	0.890489	0.684192	0.956682	0.920591	0.408456	0.927973	0.569508	0.385688	0.485013	0.839768	0.515593	0.986847	0.679638	0.920732	0.423464	0.471489	0.951747	0.790531	0.894248	0.838694	0.931449	0.90658	0.687226	0.837573	0.595521	0.768082	0.974336	0.526092	0.377188	0.319637	0.389721	0.566146	0.449669	0.349974	0.846829	0.910895	0.837907	0.145237
cg17241310	0.412998	0.594608	0.731449	0.381965	0.52363	0.642734	0.530183	0.264302	0.0956385	0.230236	0.481548	0.57675	0.229056	0.782818	0.711294	0.597636	0.743419	0.431487	0.725429	0.402109	0.178714	0.624389	0.636262	0.697674	0.16572	0.0900553	0.66278	0.164145	0.101037	0.544174	0.440296	0.760196	0.483761	0.613336	0.612391	0.0454733	0.416777	0.380492	0.391363	0.621255	0.803361	0.500585	0.783717	0.451952	0.226001	0.597723	0.0371239	0.598111	0.608461
cg24852661	0.0487283	0.0856004	0.0902872	0.580231	0.0761828	0.036961	0.132347	0.292902	0.0962595	0.0550836	0.0515201	0.737015	0.126129	0.0448658	0.0521567	0.0320488	0.0643877	0.0368452	0.0396739	0.076538	0.657815	0.724269	0.125363	0.161719	0.494048	0.0751737	0.605903	0.0913461	0.145534	0.0321017	0.0478515	0.777005	0.0474192	0.0292164	0.185893	0.113118	0.233501	0.0607764	0.12491	0.334273	0.025284	0.072468	0.0364042	0.416093	0.566146	0.106287	0.623636	0.0339563	0.0371552
cg15149645	0.369515	0.432831	0.247136	0.186443	0.238138	0.590298	0.164713	0.685906	0.325896	0.231368	0.243537	0.0322872	0.0782172	0.122366	0.390855	0.0905355	0.860411	0.212921	0.215743	0.446526	0.147363	0.887356	0.445565	0.233671	0.720469	0.083448	0.575239	0.298489	0.828037	0.0759538	0.348116	0.146555	0.847461	0.506626	0.75846	0.602663	0.408558	0.144965	0.367022	0.600157	0.305965	0.114587	0.526501	0.133639	0.499774	0.735233	0.629108	0.379772	0.395186
cg10329418	0.143725	0.554267	0.331	0.55868	0.0471372	0.401819	0.548417	0.827938	0.209104	0.352123	0.382172	0.736351	0.0313096	0.731517	0.411414	0.0532723	0.503415	0.4106	0.320409	0.328909	0.523819	0.41935	0.615173	0.794641	0.203947	0.342032	0.673065	0.310532	0.327513	0.588247	0.260281	0.828037	0.306821	0.766181	0.44927	0.460125	0.202445	0.500184	0.512024	0.881657	0.818947	0.0605032	0.27694	0.581248	0.295166	0.686643	0.788114	0.258406	0.477602
cg15403517	0.384552	0.194064	0.188741	0.267066	0.561578	0.585608	0.646473	0.125628	0.683604	0.090263	0.133881	0.178779	0.302983	0.897523	0.732106	0.43498	0.109411	0.697674	0.514766	0.545867	0.386089	0.878792	0.389305	0.222214	0.357226	0.465245	0.0641585	0.111618	0.0908536	0.79042	0.10244	0.433734	0.141436	0.578145	0.667	0.0851151	0.272461	0.406311	0.356338	0.103889	0.825657	0.554788	0.64029	0.130114	0.215289	0.12858	0.162129	0.445785	0.814881
cg19884658	0.212506	0.199428	0.120533	0.24125	0.765026	0.258491	0.192848	0.670471	0.389611	0.198696	0.493041	0.554157	0.354366	0.371663	0.719096	0.447432	0.295614	0.71067	0.476245	0.322272	0.368165	0.752279	0.358233	0.671061	0.177971	0.19818	0.115129	0.26725	0.541519	0.178511	0.1362	0.791104	0.422598	0.648088	0.654033	0.634141	0.734822	0.646192	0.230489	0.78173	0.106687	0.0979034	0.237298	0.620356	0.575629	0.295081	0.484291	0.250389	0.108846
cg11584936	0.463822	0.847461	0.888925	0.540773	0.15302	0.889981	0.747293	0.508581	0.223417	0.586413	0.209018	0.290242	0.816022	0.680938	0.729768	0.0630066	0.631532	0.745771	0.38538	0.872861	0.806974	0.151182	0.835701	0.83327	0.342343	0.792719	0.750291	0.863203	0.245982	0.0829137	0.854578	0.580231	0.895391	0.524847	0.614481	0.627716	0.44927	0.469126	0.255517	0.433734	0.0793788	0.541519	0.109751	0.492215	0.451952	0.274507	0.817034	0.872734	0.196992
cg05221167	0.066962	0.491021	0.00963768	0.0514856	0.616005	0.314125	0.605986	0.453468	0.0382443	0.196694	0.0220271	0.521993	0.054617	0.351257	0.66384	0.524534	0.467888	0.0294377	0.0188211	0.116742	0.0927135	0.717103	0.28633	0.637772	0.296471	0.0283723	0.654569	0.07398	0.81028	0.349375	0.138469	0.49022	0.167047	0.611045	0.0366921	0.0345041	0.0353549	0.333604	0.0565595	0.289718	0.643794	0.198253	0.218165	0.198824	0.324842	0.154273	0.752422	0.156477	0.283822
cg25300386	0.061175	0.0298586	0.0165698	0.0101477	0.229056	0.1478	0.396806	0.33399	0.013251	0.199498	0.0151197	0.359975	0.0447133	0.012393	0.0116875	0.0130025	0.024729	0.0199452	0.606878	0.139998	0.0415612	0.0166413	0.017801	0.0171058	0.16609	0.0154421	0.0155139	0.0479166	0.0134074	0.0124501	0.183606	0.0271012	0.0170675	0.0154127	0.0135868	0.454616	0.0166482	0.0174286	0.0180476	0.0165132	0.0169361	0.212285	0.0176854	0.0135961	0.017753	0.0156004	0.707709	0.117387	0.0155778
cg11428724	0.0430542	0.0363227	0.47006	0.0523674	0.0851151	0.522043	0.624389	0.015681	0.0733273	0.0472877	0.469243	0.0658847	0.116488	0.62703	0.763597	0.0852175	0.902953	0.0294846	0.748511	0.837433	0.078524	0.0434071	0.0675062	0.272732	0.0444243	0.316784	0.0299852	0.144525	0.0220583	0.843823	0.782441	0.394161	0.49022	0.0206792	0.492112	0.0367779	0.0490817	0.0304345	0.0256124	0.0839062	0.026418	0.0379027	0.0246701	0.0399555	0.423995	0.0406125	0.0262395	0.0669109	0.858997
cg00015770	0.226921	0.488484	0.382065	0.343063	0.610661	0.40489	0.0921193	0.134685	0.102913	0.236526	0.110159	0.45971	0.514873	0.0670958	0.469441	0.0888035	0.787759	0.0707643	0.0993971	0.416673	0.153071	0.214576	0.130507	0.13074	0.518222	0.117579	0.0823402	0.123095	0.088599	0.230728	0.100363	0.508581	0.471108	0.780545	0.107412	0.294781	0.125541	0.156059	0.0647475	0.449786	0.301319	0.0990528	0.677591	0.068001	0.0836755	0.729633	0.0777785	0.114391	0.687148
cg14900471	0.0370064	0.0938182	0.53907	0.0165818	0.06342	0.575629	0.0553343	0.310359	0.0423455	0.020453	0.662345	0.427933	0.159884	0.772827	0.416363	0.0315332	0.851853	0.0368021	0.0197971	0.573308	0.071353	0.0179803	0.29468	0.101229	0.0325355	0.0242824	0.0248751	0.0730725	0.123539	0.647258	0.0203577	0.491913	0.396598	0.171741	0.0879913	0.024953	0.0966464	0.0996971	0.041263	0.259281	0.721846	0.0303864	0.620635	0.0964686	0.0384198	0.0564093	0.173215	0.13021	0.71432
cg11812218	0.0418204	0.624019	0.749137	0.417083	0.0503679	0.172348	0.0519904	0.511825	0.217093	0.201992	0.698936	0.180517	0.0594174	0.686158	0.337824	0.50481	0.642257	0.450121	0.0450048	0.216614	0.0458439	0.401388	0.316108	0.734964	0.216379	0.0289512	0.408889	0.0724165	0.54408	0.485131	0.322754	0.0478515	0.452152	0.508882	0.0950742	0.0286483	0.0502135	0.054489	0.0483779	0.418099	0.744049	0.0218957	0.419658	0.274708	0.360385	0.441981	0.349375	0.164839	0.508676
cg23771603	0.0320983	0.608461	0.0334268	0.016803	0.0856528	0.627526	0.0311623	0.0902372	0.0821968	0.332155	0.0376815	0.0158941	0.0284699	0.654378	0.680938	0.0294813	0.735455	0.431897	0.0753626	0.4106	0.0441129	0.0252375	0.122658	0.535474	0.015646	0.0207109	0.0881711	0.0912916	0.0575086	0.55752	0.154082	0.12491	0.566343	0.772887	0.0434834	0.0343751	0.0484685	0.112248	0.0645888	0.0233282	0.0144247	0.534152	0.698225	0.0329097	0.0600716	0.0407599	0.0209184	0.042067	0.618974
cg02599464	0.318957	0.059217	0.63357	0.430614	0.697366	0.438928	0.297825	0.173144	0.0223329	0.249588	0.486925	0.637772	0.15594	0.573818	0.411114	0.0416702	0.0746261	0.0295654	0.384347	0.249758	0.167541	0.454513	0.0544603	0.714766	0.788632	0.201534	0.0402275	0.09164	0.656086	0.647528	0.289897	0.122054	0.337133	0.505829	0.381965	0.714173	0.480718	0.711294	0.0317146	0.754657	0.788173	0.332252	0.167172	0.478948	0.505019	0.609996	0.713693	0.0562986	0.572904
cg24511869	0.0232298	0.026577	0.022221	0.0311171	0.0194519	0.0245766	0.0357767	0.995279	0.0231848	0.0240718	0.0156123	0.0471527	0.0344769	0.0248382	0.0657554	0.026776	0.0185479	0.0284534	0.0250481	0.0321324	0.0281895	0.0501972	0.0192847	0.0267239	0.0304999	0.021279	0.0189235	0.0276585	0.0249339	0.014206	0.0360961	0.0390006	0.0266421	0.0183631	0.99596	0.034043	0.0276021	0.0236684	0.0286749	0.0380436	0.0267639	0.0207905	0.0255519	0.0229395	0.0274336	0.0172537	0.101581	0.043048	0.021471
cg13929328	0.126696	0.648904	0.528312	0.0525617	0.15044	0.661887	0.172996	0.120785	0.561578	0.29459	0.719726	0.662515	0.205021	0.589992	0.701201	0.0537239	0.785403	0.0500635	0.3271	0.497821	0.387338	0.490503	0.122229	0.702783	0.0479392	0.115565	0.122534	0.185893	0.408994	0.727542	0.612483	0.153573	0.528005	0.671672	0.363335	0.0813182	0.166782	0.136448	0.139735	0.708259	0.812358	0.570636	0.505725	0.24292	0.288788	0.0773025	0.53702	0.546284	0.660995
cg23857226	0.0243335	0.226001	0.631732	0.0243142	0.0369175	0.302891	0.0269522	0.702038	0.0353416	0.0188539	0.0239862	0.0196733	0.0338443	0.870987	0.791045	0.089564	0.028579	0.0591674	0.0631301	0.232507	0.026009	0.378504	0.0276915	0.688228	0.0274823	0.0522456	0.829214	0.0386779	0.0442791	0.743282	0.0272943	0.74974	0.0231296	0.782765	0.0345307	0.03134	0.0153235	0.294496	0.0562639	0.227952	0.797944	0.366234	0.380189	0.0250808	0.0438492	0.0404115	0.768537	0.0217555	0.260281
cg12571423	0.189945	0.268224	0.136293	0.0632983	0.0658043	0.0722026	0.0642002	0.104856	0.0936361	0.3278	0.0959364	0.0705739	0.417083	0.0680828	0.132367	0.0867653	0.0682368	0.0430863	0.109896	0.070454	0.0855078	0.0704374	0.0523674	0.0827765	0.0627755	0.109592	0.0908864	0.167295	0.0973403	0.69864	0.484909	0.102308	0.0869377	0.846086	0.0931873	0.0778421	0.0956097	0.444706	0.0626807	0.138575	0.794871	0.459194	0.0886259	0.0946759	0.0881465	0.0988075	0.815911	0.136003	0.141535
cg06818777	0.318447	0.615262	0.640386	0.213231	0.0971033	0.552327	0.158779	0.142811	0.637487	0.459297	0.0899735	0.083448	0.157871	0.53039	0.37606	0.157398	0.676038	0.0648516	0.09367	0.408558	0.0655493	0.629747	0.158838	0.307292	0.643794	0.0769272	0.0520898	0.0817707	0.773582	0.439243	0.550127	0.743092	0.175832	0.781441	0.426254	0.163962	0.12443	0.10724	0.105804	0.836552	0.787699	0.435384	0.432524	0.235481	0.229216	0.0744799	0.719943	0.614686	0.520281
cg00117172	0.0710318	0.0663992	0.04383	0.0181786	0.0391121	0.047909	0.304433	0.0556311	0.0422582	0.37452	0.0921452	0.184836	0.0984445	0.155879	0.0511232	0.0974001	0.0794784	0.0279549	0.154017	0.088045	0.0648814	0.414948	0.0364042	0.211427	0.0275676	0.126971	0.0644445	0.0507444	0.0594047	0.0449906	0.553554	0.0301994	0.111538	0.0813182	0.0621078	0.0900553	0.156477	0.046442	0.593727	0.0201633	0.0271072	0.0434009	0.0280189	0.0560152	0.17685	0.0617985	0.0525522	0.24372	0.0588183
cg00226923	0.912489	0.761112	0.759861	0.345342	0.349271	0.835752	0.914726	0.392824	0.819717	0.946717	0.459005	0.212587	0.495675	0.757661	0.856761	0.120533	0.762301	0.937914	0.371451	0.9162	0.555725	0.474804	0.593727	0.590994	0.380391	0.714834	0.477798	0.876961	0.542552	0.930029	0.93042	0.346652	0.733769	0.535784	0.597536	0.384654	0.603136	0.935072	0.407455	0.644155	0.915331	0.930931	0.286632	0.442911	0.480907	0.539848	0.345238	0.922469	0.936831
cg07636178	0.0202191	0.0263845	0.627135	0.0371147	0.354473	0.398783	0.0220657	0.0186411	0.0233588	0.0269613	0.0362284	0.0222239	0.0565701	0.27375	0.0219347	0.0226293	0.246082	0.0403342	0.0282444	0.0618497	0.0161745	0.0168168	0.0267459	0.754864	0.0195731	0.0374534	0.0449144	0.0197748	0.798335	0.362401	0.0144554	0.0371904	0.322188	0.0502299	0.0320754	0.748989	0.0235093	0.0303396	0.0263066	0.151944	0.805356	0.0178894	0.0311057	0.0290257	0.462274	0.0272338	0.743485	0.0226549	0.537827
cg16009558	0.739788	0.641811	0.43852	0.137349	0.517787	0.48123	0.104605	0.188104	0.264128	0.527709	0.3692	0.4542	0.361979	0.353326	0.838923	0.589992	0.594122	0.274408	0.161657	0.271733	0.268696	0.139689	0.340212	0.490503	0.51643	0.641811	0.236266	0.0711672	0.13157	0.826511	0.452062	0.269417	0.34394	0.768537	0.147255	0.0649248	0.255243	0.0832393	0.0416157	0.0500211	0.878717	0.362912	0.159569	0.0558097	0.317435	0.0690401	0.326897	0.298698	0.836819
cg11536940	0.0134355	0.347496	0.0383274	0.504395	0.170745	0.0484367	0.707784	0.0978098	0.0285224	0.407739	0.0437766	0.684445	0.508882	0.222138	0.627427	0.0382598	0.115807	0.0242677	0.0829137	0.0147701	0.618507	0.80588	0.693699	0.276017	0.0750817	0.23153	0.50703	0.0360823	0.493231	0.79609	0.0192612	0.674263	0.0506661	0.104473	0.43852	0.108914	0.270622	0.409968	0.0274336	0.10062	0.175646	0.021309	0.13177	0.0424328	0.533955	0.044486	0.60895	0.0160588	0.0198822
cg04317399	0.17577	0.765089	0.353864	0.139998	0.299434	0.148571	0.17671	0.128225	0.462489	0.144321	0.406126	0.575629	0.189875	0.609038	0.0790988	0.0778214	0.904754	0.613631	0.225153	0.517787	0.262281	0.249588	0.598005	0.470787	0.131105	0.284166	0.208224	0.258127	0.275928	0.893362	0.500299	0.757925	0.335223	0.851128	0.260747	0.245895	0.272188	0.22914	0.311771	0.572409	0.689853	0.784877	0.133743	0.438308	0.116213	0.340122	0.189875	0.101718	0.741419
cg08924430	0.117943	0.0928512	0.541734	0.585698	0.574837	0.0867126	0.609721	0.463053	0.609721	0.178121	0.787819	0.674109	0.26421	0.555308	0.25629	0.917209	0.148188	0.726857	0.400115	0.0629248	0.493132	0.637309	0.631821	0.577766	0.485785	0.336924	0.491406	0.158431	0.283822	0.459916	0.0821523	0.826485	0.0773215	0.828806	0.667925	0.589807	0.473595	0.739921	0.695358	0.54731	0.831817	0.0863676	0.62732	0.512024	0.622303	0.222214	0.267683	0.291099	0.152522
cg20279283	0.115961	0.54731	0.67212	0.0678747	0.236945	0.760065	0.337931	0.49846	0.3358	0.099333	0.253332	0.820531	0.513231	0.781614	0.787153	0.902576	0.825805	0.821772	0.197069	0.54537	0.359865	0.835752	0.715975	0.331952	0.6553	0.365017	0.652228	0.223747	0.227642	0.680856	0.0984445	0.487418	0.421307	0.890415	0.409746	0.24504	0.219851	0.403774	0.173631	0.727018	0.846786	0.138832	0.641633	0.318957	0.580637	0.477798	0.34646	0.253157	0.771859
cg09107315	0.381734	0.149382	0.725209	0.498741	0.498035	0.0715263	0.708259	0.152963	0.11304	0.565558	0.0841585	0.726629	0.503104	0.655661	0.362092	0.0223674	0.056676	0.685738	0.491711	0.15528	0.398481	0.756248	0.505725	0.498944	0.497501	0.257593	0.227153	0.0944728	0.624479	0.716867	0.108775	0.615066	0.0665047	0.0246671	0.418687	0.659254	0.0808014	0.59871	0.0603049	0.669884	0.090642	0.0819249	0.132901	0.0701599	0.562906	0.392918	0.46819	0.097693	0.173144
cg15191648	0.698787	0.0773215	0.471707	0.030676	0.634969	0.586198	0.167295	0.0842553	0.153071	0.238927	0.47058	0.64836	0.378087	0.556777	0.665083	0.706282	0.687226	0.17718	0.248601	0.596608	0.355939	0.756114	0.273391	0.468693	0.0524491	0.0287502	0.216143	0.215438	0.694282	0.729965	0.711371	0.268132	0.0337986	0.770329	0.486925	0.0765753	0.0984771	0.480087	0.0961681	0.646726	0.82264	0.530614	0.21128	0.382483	0.165291	0.226074	0.114353	0.606507	0.626839
cg21929875	0.442601	0.496003	0.613247	0.308622	0.831524	0.852454	0.329602	0.772827	0.841437	0.572409	0.625222	0.184018	0.33993	0.902912	0.356716	0.251933	0.889737	0.39373	0.80307	0.764073	0.346254	0.899323	0.570831	0.588331	0.164969	0.31905	0.48568	0.625505	0.941135	0.206405	0.396189	0.371553	0.917385	0.17055	0.507863	0.45951	0.652944	0.336438	0.620536	0.921917	0.360088	0.264486	0.697443	0.619692	0.404789	0.708018	0.901064	0.483656	0.649163
cg07880854	0.239633	0.18078	0.120238	0.514153	0.185044	0.430508	0.552726	0.374426	0.269136	0.136103	0.120067	0.822022	0.692809	0.468803	0.0418204	0.0530997	0.180384	0.780908	0.0997929	0.126206	0.218564	0.473057	0.441142	0.709754	0.25831	0.238556	0.629474	0.16958	0.141904	0.0716696	0.148809	0.290069	0.202604	0.238386	0.344926	0.423366	0.53907	0.0408705	0.0611508	0.17892	0.148977	0.292902	0.0621995	0.245982	0.250718	0.181133	0.657445	0.147523	0.162319
cg14826683	0.891658	0.409527	0.384865	0.871358	0.73866	0.157341	0.825449	0.686333	0.370743	0.867307	0.34153	0.498651	0.628081	0.301421	0.150013	0.542362	0.288788	0.774397	0.567042	0.689774	0.461976	0.320602	0.345544	0.281013	0.62665	0.688067	0.313544	0.723725	0.748219	0.101197	0.739788	0.241505	0.383919	0.29724	0.284723	0.285016	0.796251	0.593318	0.222734	0.239794	0.224404	0.892455	0.589501	0.244375	0.934959	0.397813	0.35517	0.787409	0.538768
cg20291049	0.246698	0.15618	0.734381	0.217834	0.185528	0.789048	0.128909	0.146969	0.295081	0.416272	0.674991	0.488768	0.452754	0.136943	0.824618	0.580344	0.775596	0.855262	0.0997588	0.446091	0.231054	0.174559	0.235057	0.135651	0.0635587	0.206174	0.15335	0.177436	0.168671	0.580739	0.633398	0.544174	0.101197	0.647528	0.135702	0.130256	0.54577	0.543675	0.128262	0.667584	0.828916	0.735377	0.198319	0.233943	0.0836518	0.121032	0.0522109	0.267154	0.162826
cg17718302	0.0250366	0.0164744	0.584432	0.0436902	0.638405	0.201317	0.0354052	0.751674	0.0176718	0.0197768	0.0173321	0.0729224	0.035296	0.734064	0.0903308	0.0156946	0.203055	0.0598163	0.545563	0.216306	0.0192988	0.0142459	0.0250535	0.744329	0.0151426	0.0257144	0.577577	0.0207037	0.30569	0.312242	0.0499867	0.0406481	0.280845	0.0459528	0.0220139	0.226393	0.0252589	0.211743	0.0237226	0.745438	0.020506	0.217007	0.0265262	0.0314671	0.019664	0.541734	0.865107	0.0164381	0.0164564
cg18349835	0.00711388	0.288685	0.127438	0.00493865	0.00499087	0.435678	0.0194841	0.00477061	0.0200259	0.0450407	0.00818096	0.519975	0.0381872	0.385063	0.738444	0.0050077	0.727901	0.0655021	0.00490473	0.373027	0.00763601	0.00477061	0.0120816	0.0196497	0.00531282	0.0146344	0.0059228	0.0079482	0.018756	0.646554	0.12189	0.00525905	0.421519	0.74048	0.00802404	0.00780989	0.0105377	0.0032825	0.00372459	0.0232085	0.853495	0.201615	0.0979386	0.00513734	0.0073796	0.00596129	0.00413163	0.136844	0.596608
cg15329642	0.197297	0.340515	0.707068	0.655022	0.838473	0.319637	0.90713	0.887023	0.696619	0.248873	0.743485	0.375659	0.56189	0.673607	0.395569	0.29061	0.367449	0.757588	0.490804	0.402436	0.410302	0.721007	0.543568	0.692386	0.0688484	0.272369	0.68773	0.642638	0.409746	0.076323	0.185174	0.688635	0.570938	0.0520898	0.566848	0.773265	0.833604	0.209416	0.448969	0.31433	0.0482751	0.165291	0.301121	0.853885	0.504001	0.720179	0.369414	0.205889	0.128719
cg19343464	0.124994	0.592382	0.0296944	0.460944	0.044472	0.535078	0.0191099	0.033898	0.118433	0.246518	0.201243	0.0682688	0.0502743	0.69678	0.667328	0.673166	0.766441	0.20934	0.066865	0.249859	0.0904258	0.77609	0.167481	0.0243817	0.0897759	0.117943	0.045993	0.0802441	0.0386565	0.666916	0.217414	0.250475	0.205194	0.582625	0.036893	0.380391	0.0671124	0.261932	0.0396559	0.403774	0.789514	0.0682225	0.326209	0.547996	0.0345221	0.0397153	0.0519039	0.381848	0.468693
cg08101264	0.0527306	0.290705	0.0306174	0.253604	0.287211	0.0257786	0.349671	0.76216	0.103589	0.101647	0.450415	0.699412	0.578727	0.68136	0.799245	0.0358641	0.308432	0.498741	0.231447	0.0794979	0.493529	0.691067	0.456293	0.200961	0.314125	0.176173	0.120402	0.073295	0.429363	0.724849	0.106014	0.399585	0.151895	0.0485747	0.277131	0.327195	0.413724	0.746792	0.042109	0.744252	0.793964	0.0586511	0.0595583	0.0690556	0.0587947	0.487178	0.747514	0.0416834	0.471397
cg03973663	0.531341	0.274805	0.233172	0.899737	0.751142	0.119788	0.636449	0.691067	0.181551	0.15697	0.724022	0.821772	0.605252	0.499373	0.88833	0.650782	0.236093	0.51343	0.752896	0.428661	0.58588	0.671159	0.299628	0.42409	0.332538	0.728558	0.830298	0.436791	0.27201	0.167047	0.479652	0.878598	0.0944984	0.297057	0.791748	0.701603	0.631821	0.122097	0.550127	0.207669	0.175029	0.559928	0.307378	0.696172	0.594808	0.218892	0.648626	0.3618	0.240041
cg16638540	0.102812	0.609819	0.031786	0.0294475	0.217177	0.664724	0.0881978	0.305414	0.222734	0.496407	0.174755	0.587283	0.423262	0.495432	0.62007	0.0285258	0.853402	0.0424766	0.0735437	0.578544	0.134543	0.0417661	0.162513	0.0926385	0.0375787	0.0275526	0.374126	0.280307	0.204945	0.586413	0.106822	0.28859	0.528815	0.72492	0.0760874	0.0517773	0.165901	0.182362	0.256835	0.442099	0.0479013	0.66829	0.127992	0.190778	0.0225215	0.279819	0.0432213	0.642638	0.0944984
cg08097882	0.0313847	0.0201423	0.0284699	0.0326776	0.0484028	0.0624483	0.0239083	0.0261867	0.0610621	0.0392251	0.0288514	0.695109	0.0623066	0.0217393	0.867754	0.0161972	0.0192917	0.865682	0.0348032	0.55044	0.0868152	0.0333825	0.73232	0.0150419	0.0168604	0.0987185	0.0282061	0.0380483	0.0228773	0.0538824	0.020429	0.362703	0.0235837	0.908765	0.0349806	0.024102	0.0512421	0.24538	0.0238518	0.345954	0.0187953	0.639446	0.0157037	0.0211371	0.142972	0.0781131	0.0160841	0.263941	0.0261839
cg24715245	0.0868152	0.225919	0.671248	0.580949	0.0583295	0.310052	0.363532	0.0492722	0.209416	0.123139	0.088549	0.612857	0.104605	0.834381	0.223993	0.0272149	0.0617859	0.285207	0.0335322	0.0911017	0.0951301	0.0275467	0.0365175	0.0387307	0.0683341	0.0427653	0.0378349	0.0610245	0.0477038	0.773636	0.582528	0.0612901	0.0314636	0.894203	0.0726474	0.032497	0.0480146	0.036961	0.0824714	0.0268343	0.0454591	0.543568	0.0562418	0.0375604	0.0489683	0.0293844	0.0387574	0.204382	0.189439
cg00806490	0.194129	0.719555	0.0890955	0.0814128	0.2145	0.511394	0.0590963	0.287402	0.308719	0.31905	0.369807	0.715204	0.0983584	0.446631	0.144156	0.203663	0.775719	0.0726142	0.159569	0.412998	0.186238	0.578933	0.103318	0.108205	0.0968071	0.0691023	0.129508	0.0834892	0.097008	0.858324	0.759861	0.0885746	0.609721	0.584928	0.0966131	0.113309	0.098257	0.173354	0.146159	0.0817268	0.894539	0.143277	0.553449	0.0951885	0.0663099	0.263105	0.0679703	0.165469	0.76098
cg16979445	0.840135	0.431688	0.333518	0.505221	0.349065	0.505725	0.85917	0.356338	0.506244	0.873853	0.524023	0.729277	0.705803	0.125501	0.898921	0.176517	0.156059	0.670053	0.847461	0.497711	0.655479	0.57251	0.66829	0.370646	0.200661	0.865514	0.467585	0.856259	0.200022	0.205021	0.778785	0.578544	0.597536	0.296968	0.340844	0.547603	0.71114	0.684445	0.331952	0.330611	0.263848	0.704408	0.208776	0.374934	0.685906	0.513953	0.487228	0.475219	0.336108
cg00489401	0.313353	0.622676	0.698559	0.560225	0.270255	0.682099	0.46443	0.110301	0.491517	0.337931	0.594418	0.695772	0.402208	0.670471	0.812522	0.637963	0.865886	0.0328305	0.684534	0.714251	0.265396	0.870108	0.300261	0.733452	0.0948819	0.139545	0.48123	0.151944	0.313353	0.670976	0.508075	0.452441	0.595521	0.747929	0.545282	0.6506	0.26202	0.788699	0.0590125	0.568649	0.844182	0.727693	0.10679	0.372298	0.375224	0.350358	0.3618	0.667165	0.701437
cg22442090	0.552533	0.687886	0.562401	0.696256	0.556208	0.695686	0.899822	0.860669	0.816698	0.665436	0.166156	0.70221	0.673702	0.727901	0.871522	0.906371	0.341426	0.359057	0.6067	0.719322	0.734453	0.874893	0.898475	0.741419	0.874936	0.7868	0.817599	0.520077	0.468077	0.897157	0.45156	0.921733	0.730436	0.839677	0.703463	0.855486	0.787461	0.901979	0.860629	0.875304	0.895029	0.824174	0.768082	0.926304	0.804148	0.298392	0.850256	0.60961	0.866823
cg14494812	0.434679	0.6167	0.420791	0.317649	0.593429	0.744329	0.302594	0.765718	0.861142	0.52363	0.723607	0.161719	0.321011	0.190844	0.81028	0.400426	0.421721	0.804359	0.888451	0.635062	0.413401	0.65142	0.37606	0.771226	0.396898	0.643536	0.77434	0.86887	0.871822	0.144788	0.41935	0.219927	0.694282	0.202074	0.562598	0.851555	0.837062	0.225334	0.584121	0.860748	0.235184	0.397286	0.429363	0.628349	0.701757	0.782578	0.46685	0.313735	0.314422
cg12144803	0.823417	0.806265	0.585608	0.256479	0.39104	0.809363	0.417994	0.330801	0.328102	0.774397	0.329017	0.157622	0.392621	0.86644	0.369302	0.183947	0.808933	0.325805	0.338629	0.717724	0.260198	0.171207	0.390855	0.598223	0.87148	0.457337	0.288495	0.834718	0.423776	0.859978	0.803932	0.305788	0.776671	0.86329	0.291955	0.285785	0.567142	0.867507	0.401264	0.544364	0.876188	0.725136	0.457337	0.369414	0.243971	0.484291	0.847922	0.873111	0.776541
cg05187322	0.757661	0.871775	0.970207	0.944896	0.949915	0.412141	0.945955	0.907737	0.90994	0.940897	0.937464	0.945955	0.602857	0.513231	0.930983	0.94032	0.831198	0.872734	0.866484	0.881904	0.934729	0.919995	0.654569	0.956845	0.935883	0.930029	0.912235	0.564431	0.955596	0.856087	0.759796	0.91973	0.90761	0.352708	0.919504	0.909724	0.916528	0.927758	0.937064	0.935186	0.419994	0.77628	0.918055	0.918268	0.909918	0.918315	0.925674	0.589807	0.920544
cg05037688	0.679109	0.324142	0.116042	0.624677	0.651227	0.543568	0.444592	0.589616	0.159257	0.678514	0.203733	0.882151	0.515204	0.385894	0.0749513	0.373718	0.185312	0.622125	0.580056	0.497928	0.709844	0.857059	0.41935	0.648178	0.857103	0.744329	0.719473	0.408354	0.550727	0.403867	0.471601	0.677666	0.302289	0.121159	0.659619	0.611421	0.593636	0.262832	0.612012	0.564642	0.103656	0.577674	0.781258	0.449163	0.728836	0.724987	0.875665	0.41688	0.818992
cg11438428	0.35517	0.215823	0.0387196	0.0196759	0.0926871	0.0530691	0.168929	0.0530333	0.066178	0.0638435	0.077361	0.827661	0.31619	0.073491	0.846918	0.0422867	0.0555689	0.020677	0.0574065	0.700795	0.116901	0.110634	0.0776801	0.0356208	0.0179765	0.0948251	0.119302	0.119946	0.0695182	0.610371	0.100749	0.300456	0.0346266	0.018589	0.101581	0.0672819	0.0876139	0.5552	0.0364562	0.0459291	0.693127	0.720857	0.0609627	0.0713029	0.0370311	0.0271252	0.014726	0.0565805	0.570734
cg23307338	0.811476	0.674578	0.284439	0.178779	0.171143	0.66181	0.721302	0.60789	0.348634	0.819864	0.272826	0.674263	0.577952	0.115768	0.557419	0.0966464	0.132295	0.35955	0.490919	0.68394	0.400831	0.0792793	0.54741	0.23259	0.413401	0.626261	0.441554	0.57727	0.147307	0.627622	0.833141	0.482608	0.861669	0.326505	0.20552	0.151286	0.716714	0.199358	0.55752	0.210211	0.148639	0.825449	0.389721	0.368376	0.472128	0.409746	0.244215	0.686567	0.743222
cg09179845	0.0947683	0.594023	0.666403	0.752347	0.771348	0.197531	0.589218	0.751806	0.655479	0.120825	0.724562	0.732607	0.586888	0.181551	0.556588	0.863705	0.614207	0.723259	0.711902	0.1343	0.609914	0.372298	0.569318	0.677429	0.471211	0.333413	0.630412	0.258846	0.613836	0.709916	0.106454	0.786687	0.189511	0.742868	0.73225	0.459916	0.699412	0.829506	0.818056	0.614973	0.0826442	0.107863	0.767607	0.673517	0.634778	0.266444	0.228254	0.111321	0.495432
cg00090147	0.040936	0.180651	0.728836	0.03167	0.146662	0.499046	0.153733	0.0573089	0.310052	0.0507782	0.776671	0.642346	0.0957575	0.873374	0.606789	0.321217	0.741859	0.0416949	0.522503	0.51759	0.164648	0.0419817	0.0905066	0.755141	0.0466873	0.125994	0.0403236	0.0985954	0.0494219	0.84161	0.0425065	0.411114	0.129233	0.34636	0.128865	0.125947	0.0937283	0.401709	0.0466713	0.230405	0.373218	0.046583	0.649163	0.0803687	0.14263	0.160181	0.0574409	0.0621744	0.803422
cg23995753	0.717959	0.282618	0.122876	0.330402	0.05129	0.160882	0.0777573	0.575034	0.0754397	0.723725	0.149676	0.202979	0.438714	0.831766	0.499589	0.0721811	0.150613	0.694527	0.211598	0.610188	0.65709	0.706194	0.134024	0.165901	0.361395	0.738873	0.351544	0.122577	0.72492	0.901064	0.430915	0.11251	0.384744	0.160537	0.230236	0.183395	0.0807809	0.472862	0.0515991	0.0745524	0.574019	0.539848	0.226315	0.0499278	0.408778	0.217177	0.830343	0.423776	0.337931
cg12768605	0.11914	0.66393	0.780731	0.348427	0.433534	0.45971	0.0632331	0.0229298	0.0775636	0.121927	0.0345568	0.273391	0.0764576	0.767224	0.71917	0.661887	0.703625	0.0625275	0.0356557	0.3309	0.0491293	0.722748	0.0442007	0.28954	0.0145017	0.0575887	0.550215	0.110078	0.469546	0.736624	0.446422	0.117347	0.299067	0.632932	0.109443	0.0590009	0.0668184	0.127992	0.0971309	0.622218	0.81655	0.40294	0.30209	0.035332	0.339425	0.229368	0.544585	0.176985	0.617823
cg22660578	0.0516163	0.137247	0.0352688	0.018747	0.157398	0.0843459	0.0482592	0.072772	0.292991	0.628536	0.114124	0.360691	0.0969829	0.426472	0.0295725	0.0177419	0.675763	0.0350092	0.0415542	0.582625	0.0846153	0.0367738	0.0803256	0.17724	0.190572	0.110999	0.104819	0.114197	0.13488	0.658546	0.593821	0.123766	0.0370311	0.796251	0.0769272	0.0473493	0.121713	0.0514947	0.0392084	0.637009	0.75276	0.548906	0.321416	0.0463061	0.0329622	0.134831	0.0339226	0.160118	0.686826
cg01381846	0.691395	0.802843	0.833987	0.357747	0.357008	0.813192	0.491913	0.543067	0.823269	0.718644	0.875262	0.446943	0.271152	0.854363	0.753704	0.760196	0.872606	0.216542	0.350168	0.722748	0.19972	0.878519	0.398683	0.829115	0.355262	0.253702	0.730511	0.249234	0.384654	0.730653	0.737858	0.708092	0.719096	0.84627	0.607067	0.27937	0.641898	0.23153	0.159016	0.886487	0.871696	0.746366	0.295081	0.846829	0.227233	0.704821	0.895391	0.780417	0.842495
cg06821120	0.383527	0.300536	0.151722	0.596411	0.0963507	0.116992	0.693127	0.240199	0.334379	0.180384	0.354473	0.75671	0.677998	0.564749	0.747444	0.27665	0.149438	0.166531	0.162195	0.255243	0.668652	0.724987	0.420599	0.257271	0.255243	0.432923	0.14814	0.241412	0.144525	0.824803	0.158779	0.170105	0.235753	0.268132	0.379772	0.660454	0.536301	0.801201	0.127024	0.147474	0.452551	0.341036	0.106047	0.372601	0.169782	0.27098	0.695277	0.26751	0.156775
cg20908204	0.107682	0.105804	0.0771452	0.130875	0.655843	0.187402	0.44864	0.12674	0.191077	0.148028	0.454833	0.139189	0.349065	0.570525	0.466648	0.418099	0.128764	0.238736	0.44367	0.0836976	0.182767	0.84667	0.0900292	0.127253	0.27106	0.128132	0.421926	0.292902	0.186556	0.0535106	0.130303	0.0775636	0.309486	0.0691998	0.400934	0.132724	0.684445	0.146005	0.790644	0.27741	0.0857849	0.0711832	0.32503	0.652228	0.0738673	0.331101	0.220902	0.0935818	0.221132
cg04456238	0.864857	0.749324	0.748989	0.20751	0.213074	0.729203	0.210667	0.610761	0.211598	0.781841	0.521944	0.205741	0.367963	0.507767	0.87988	0.161242	0.749064	0.334684	0.294039	0.747856	0.292715	0.215906	0.356143	0.821229	0.900114	0.54731	0.509918	0.35605	0.382583	0.887065	0.835414	0.549609	0.51097	0.723942	0.3278	0.334684	0.237378	0.771165	0.304163	0.720021	0.893894	0.818743	0.499589	0.303089	0.375447	0.45951	0.826853	0.855611	0.870663
cg26620157	0.301319	0.298489	0.327195	0.0561983	0.492328	0.54408	0.405701	0.0925325	0.526308	0.551336	0.0701909	0.297825	0.0843966	0.547603	0.822083	0.709681	0.613047	0.105462	0.262281	0.190078	0.127119	0.656363	0.122054	0.105948	0.908116	0.197871	0.0393984	0.415759	0.0574308	0.752347	0.170235	0.381965	0.0594513	0.441657	0.687073	0.0558617	0.0670684	0.178318	0.107508	0.801925	0.759665	0.419658	0.348522	0.617186	0.463701	0.0540405	0.430915	0.132618	0.607458
cg16907566	0.533854	0.48949	0.273282	0.749137	0.544174	0.386391	0.815754	0.353864	0.244704	0.395877	0.778002	0.631267	0.53476	0.0383947	0.673786	0.670305	0.4204	0.678344	0.757448	0.138375	0.594215	0.745311	0.603136	0.362092	0.727018	0.438205	0.236007	0.268132	0.179727	0.0325597	0.448246	0.792091	0.107309	0.558289	0.638229	0.720255	0.746509	0.832666	0.158724	0.543462	0.780545	0.214263	0.0694385	0.618507	0.706434	0.096524	0.744613	0.438091	0.411518
cg14614211	0.0714061	0.678084	0.0551536	0.322101	0.081392	0.649244	0.123051	0.0345918	0.321416	0.13421	0.102049	0.45961	0.206481	0.24504	0.589312	0.0446274	0.679477	0.0372812	0.0554368	0.115683	0.136056	0.0522019	0.131861	0.104119	0.244051	0.0346653	0.107829	0.0948819	0.159144	0.709599	0.475411	0.113661	0.0426902	0.782262	0.0921452	0.0556615	0.0811473	0.570012	0.070962	0.0480834	0.839587	0.441439	0.0722568	0.0550747	0.046613	0.143421	0.028545	0.21082	0.715512
cg04576021	0.919361	0.410692	0.842676	0.450524	0.134831	0.885267	0.358652	0.28682	0.314803	0.877085	0.414726	0.233943	0.400215	0.717258	0.108522	0.413832	0.507457	0.302594	0.151241	0.735604	0.390855	0.542149	0.748641	0.803422	0.766567	0.621255	0.62798	0.872241	0.291003	0.119098	0.901275	0.466051	0.557325	0.227481	0.252729	0.493041	0.381405	0.562796	0.455542	0.380612	0.206029	0.918185	0.352025	0.802445	0.652859	0.469846	0.76013	0.850775	0.285965
cg21554552	0.0227593	0.184151	0.0309571	0.0250707	0.287927	0.391363	0.290515	0.0307817	0.16384	0.0466271	0.0158358	0.0212612	0.0558933	0.561474	0.124002	0.0260849	0.682608	0.0824027	0.0253207	0.46443	0.0458148	0.609511	0.00987394	0.044106	0.0215365	0.0174305	0.261843	0.0401477	0.67568	0.371451	0.561578	0.765411	0.157991	0.0124236	0.0965825	0.0753626	0.01422	0.792719	0.01217	0.686643	0.644252	0.416183	0.0211371	0.0268402	0.0230425	0.0413696	0.681864	0.439749	0.0173831
cg10757144	0.151241	0.666489	0.515496	0.257095	0.0944122	0.494465	0.336009	0.633754	0.661973	0.498249	0.59393	0.514568	0.137705	0.544262	0.413932	0.597906	0.563917	0.611235	0.608269	0.290139	0.178053	0.223838	0.405507	0.621552	0.582528	0.257515	0.0878403	0.109669	0.180651	0.835321	0.305876	0.755218	0.219678	0.3831	0.320804	0.0853733	0.111461	0.144156	0.449898	0.118526	0.460834	0.174217	0.443349	0.727018	0.166156	0.132009	0.821229	0.125319	0.676653
cg20022541	0.678429	0.875132	0.0952865	0.852968	0.830343	0.761817	0.848948	0.596702	0.872284	0.627716	0.0799394	0.796225	0.884407	0.392298	0.802146	0.11491	0.437784	0.309782	0.723415	0.863418	0.537517	0.546897	0.0745524	0.0789478	0.397501	0.878069	0.897897	0.468693	0.455038	0.0219981	0.283069	0.750417	0.873457	0.589312	0.920783	0.513854	0.855528	0.670814	0.118526	0.0401635	0.865107	0.859131	0.671248	0.919864	0.857103	0.881535	0.888451	0.649857	0.0694695
cg13462129	0.775719	0.221549	0.616208	0.317256	0.496892	0.707068	0.173074	0.13083	0.460523	0.650782	0.400934	0.710898	0.453179	0.255159	0.181421	0.48918	0.252469	0.648088	0.192318	0.55772	0.420094	0.81346	0.407349	0.320711	0.415455	0.604493	0.216775	0.271262	0.564749	0.19979	0.72983	0.386828	0.116003	0.176237	0.621255	0.261572	0.180198	0.761563	0.185967	0.910624	0.36652	0.625505	0.471108	0.182424	0.66215	0.215516	0.649686	0.708713	0.329907
cg02909790	0.1952	0.076556	0.220902	0.0689417	0.0382598	0.535574	0.0302032	0.0571356	0.048613	0.0999898	0.0370547	0.0448031	0.232011	0.239542	0.0704716	0.0473493	0.378994	0.0479249	0.629839	0.1177	0.0588934	0.0509102	0.0519039	0.664192	0.0628297	0.244948	0.0373012	0.0660327	0.824764	0.0687479	0.345639	0.0612395	0.0459864	0.0592418	0.0492318	0.770128	0.0591455	0.0441664	0.0346266	0.513331	0.846829	0.520281	0.0484435	0.0373463	0.120863	0.0353872	0.414031	0.146863	0.221295
cg08572611	0.0937902	0.0580137	0.363962	0.036219	0.0691321	0.0373065	0.0456145	0.0634067	0.0782981	0.469441	0.0851907	0.721846	0.238833	0.437391	0.792208	0.040933	0.19722	0.024344	0.030073	0.145477	0.151895	0.043608	0.0745344	0.0925076	0.0166646	0.0389539	0.0845254	0.147307	0.0833775	0.802263	0.698001	0.0317686	0.174024	0.690552	0.102143	0.028483	0.138786	0.110523	0.0216061	0.097781	0.82192	0.689853	0.134349	0.0187742	0.0279061	0.0885244	0.0350456	0.370341	0.614389
cg24641737	0.588148	0.554996	0.736823	0.811057	0.443982	0.134256	0.707709	0.833846	0.18973	0.329212	0.806974	0.651762	0.840284	0.0664289	0.885361	0.755141	0.472229	0.558085	0.685994	0.584432	0.801147	0.787578	0.562502	0.821722	0.775965	0.817389	0.89102	0.540658	0.827202	0.538867	0.398265	0.486482	0.291761	0.227719	0.804416	0.624479	0.584724	0.55649	0.847011	0.86593	0.459401	0.498035	0.60772	0.776541	0.830873	0.858832	0.898802	0.347705	0.568836
cg09243021	0.312153	0.233172	0.236693	0.283822	0.17429	0.106653	0.628349	0.132469	0.504607	0.279918	0.546811	0.459916	0.416272	0.268696	0.703047	0.0663251	0.10672	0.317256	0.303183	0.132996	0.630674	0.398973	0.235306	0.232507	0.0488777	0.267586	0.0890683	0.313842	0.159202	0.725136	0.492328	0.0749325	0.256387	0.526407	0.197777	0.565937	0.447945	0.783593	0.16634	0.418499	0.718035	0.557905	0.468077	0.127438	0.59393	0.180717	0.519162	0.466551	0.316108
cg18674980	0.307378	0.413192	0.370743	0.348522	0.630037	0.292715	0.495817	0.0442007	0.0666986	0.282329	0.485562	0.50713	0.121032	0.0287407	0.655207	0.568935	0.481439	0.0268492	0.608553	0.193564	0.521606	0.0603275	0.202522	0.531131	0.0715611	0.0668054	0.036471	0.0881465	0.0953137	0.600157	0.346552	0.830633	0.246255	0.71694	0.611714	0.664471	0.416673	0.646009	0.0261809	0.359158	0.762361	0.301615	0.105596	0.156415	0.418906	0.229056	0.372099	0.568649	0.355851
cg16173109	0.91266	0.443566	0.889283	0.410904	0.315396	0.668381	0.908161	0.32631	0.812358	0.897683	0.41101	0.404485	0.745172	0.959079	0.53039	0.110814	0.396598	0.479143	0.975689	0.911383	0.643536	0.868178	0.355752	0.538247	0.896662	0.878239	0.50481	0.746229	0.256741	0.275828	0.941561	0.435036	0.780101	0.529131	0.745172	0.650782	0.495091	0.203517	0.424198	0.233417	0.347392	0.956311	0.499152	0.263754	0.655568	0.535574	0.441142	0.905043	0.387134
cg12799895	0.616407	0.133881	0.0518843	0.0317898	0.322101	0.0387832	0.287402	0.406518	0.241919	0.288884	0.639542	0.0449007	0.421114	0.0345129	0.0140418	0.24538	0.752347	0.0290524	0.0660189	0.152622	0.0505114	0.0557493	0.234283	0.278707	0.0457468	0.0256037	0.359865	0.2145	0.571248	0.0706253	0.570425	0.237889	0.156722	0.414031	0.0837181	0.127438	0.361587	0.279918	0.153406	0.0981933	0.0242368	0.62007	0.156299	0.304062	0.146815	0.183112	0.0631436	0.379655	0.455438
cg12741420	0.0593439	0.620743	0.545465	0.039296	0.027254	0.500791	0.0729224	0.0348285	0.043284	0.0185572	0.271152	0.435481	0.0667752	0.730653	0.672891	0.0167255	0.709754	0.0165219	0.27758	0.352908	0.0269057	0.731738	0.0366462	0.0250882	0.0158219	0.024513	0.191513	0.0211035	0.12518	0.682437	0.0446595	0.0363998	0.438416	0.60772	0.2145	0.0143015	0.0385949	0.0172037	0.016692	0.603407	0.709443	0.324055	0.171207	0.0385429	0.126206	0.0634988	0.0329942	0.0597068	0.648548
cg14894144	0.623543	0.752948	0.170357	0.838473	0.488677	0.782507	0.753913	0.373218	0.634402	0.819364	0.857942	0.904195	0.520281	0.130014	0.893644	0.828487	0.522379	0.875589	0.857358	0.399168	0.663482	0.910206	0.649939	0.444918	0.533955	0.809836	0.899038	0.433019	0.680856	0.888084	0.26923	0.89748	0.486094	0.0998543	0.85332	0.715356	0.652769	0.423567	0.885565	0.562298	0.295081	0.231208	0.382172	0.649423	0.871954	0.32246	0.92839	0.492017	0.398783
cg05215575	0.228895	0.429075	0.785164	0.743551	0.845955	0.26698	0.762951	0.69166	0.469741	0.214347	0.688067	0.634489	0.472336	0.224319	0.233581	0.718265	0.432524	0.710055	0.437207	0.474905	0.424391	0.669442	0.822751	0.645071	0.773771	0.449898	0.824618	0.439437	0.82926	0.114353	0.175291	0.657272	0.443019	0.254574	0.831244	0.831817	0.565744	0.154388	0.727018	0.406311	0.230812	0.168992	0.816859	0.774076	0.38528	0.794871	0.187971	0.285292	0.17844
cg25782229	0.8611	0.341624	0.718644	0.287112	0.122577	0.749464	0.213151	0.628166	0.161369	0.832908	0.323457	0.185967	0.33852	0.794245	0.563917	0.276741	0.746436	0.350868	0.257002	0.626447	0.275356	0.164466	0.296283	0.881862	0.928523	0.447432	0.547704	0.284076	0.481127	0.856553	0.850256	0.592188	0.196402	0.865313	0.269597	0.326209	0.173354	0.844132	0.322754	0.769936	0.416414	0.858077	0.521824	0.296106	0.400426	0.21693	0.825244	0.85223	0.891291
cg02657360	0.563104	0.348634	0.391775	0.450937	0.411721	0.315703	0.375845	0.82148	0.70896	0.480498	0.466648	0.357946	0.45032	0.119585	0.309295	0.915383	0.36078	0.731166	0.838518	0.587283	0.391363	0.903079	0.377874	0.80588	0.955991	0.631349	0.65213	0.364918	0.782698	0.308432	0.486094	0.518969	0.387856	0.519563	0.670471	0.169909	0.588828	0.218963	0.877288	0.611906	0.252025	0.428245	0.647995	0.701519	0.83805	0.767945	0.882026	0.325705	0.476574
cg13791131	0.044908	0.580442	0.174089	0.0577296	0.137807	0.747929	0.119623	0.164915	0.573504	0.106421	0.190494	0.227153	0.414231	0.0501312	0.774786	0.037206	0.811626	0.594608	0.0709297	0.449063	0.113927	0.0434898	0.306135	0.768469	0.109048	0.0395629	0.13167	0.233087	0.608848	0.735604	0.285491	0.329907	0.411618	0.817389	0.163244	0.0970388	0.20934	0.0382698	0.176649	0.189213	0.749261	0.618706	0.413401	0.112402	0.0587711	0.0979034	0.0550224	0.230236	0.723108
cg14467840	0.832666	0.871954	0.460231	0.301121	0.441981	0.291955	0.408354	0.424492	0.565255	0.909307	0.46443	0.18973	0.526407	0.611045	0.942665	0.110957	0.676996	0.624762	0.343165	0.904195	0.412588	0.312951	0.471917	0.46207	0.717178	0.734155	0.425541	0.887272	0.81346	0.867973	0.804359	0.23325	0.835139	0.939384	0.329308	0.454513	0.619179	0.90645	0.357325	0.610661	0.956768	0.876961	0.324244	0.299348	0.477798	0.562401	0.444806	0.804095	0.938969
cg07703401	0.0558721	0.483446	0.248777	0.0524131	0.311386	0.0610008	0.0652359	0.105877	0.0487845	0.0624616	0.487744	0.65846	0.137563	0.0400198	0.723415	0.645733	0.193842	0.661361	0.0612007	0.0517332	0.116742	0.83262	0.0908864	0.0675408	0.0161972	0.0648659	0.0492969	0.0782781	0.0436196	0.643983	0.536707	0.105837	0.0503337	0.476771	0.045254	0.0730548	0.0621995	0.123904	0.0379582	0.0589168	0.737169	0.485562	0.0519379	0.489597	0.411313	0.0995756	0.0298449	0.159502	0.670053
cg06022562	0.963299	0.572806	0.769802	0.334488	0.563006	0.725716	0.915795	0.924364	0.584322	0.704499	0.69752	0.345038	0.605711	0.264302	0.539848	0.26923	0.357532	0.922649	0.322562	0.870489	0.800363	0.290341	0.527012	0.667418	0.555093	0.935016	0.451852	0.941308	0.530074	0.326897	0.957	0.48949	0.717724	0.797501	0.815809	0.436994	0.617642	0.524949	0.561578	0.312434	0.537721	0.94684	0.49343	0.484191	0.759281	0.586604	0.263941	0.959471	0.407349
cg04721883	0.782383	0.672711	0.759405	0.744543	0.686333	0.68781	0.260371	0.268516	0.808361	0.672891	0.841659	0.870233	0.313943	0.886046	0.702075	0.860411	0.852072	0.935883	0.852716	0.710055	0.689455	0.912025	0.667925	0.6715	0.662961	0.541837	0.265912	0.41101	0.787699	0.841118	0.696256	0.33138	0.525703	0.955922	0.790188	0.618706	0.322272	0.625138	0.380391	0.552935	0.864126	0.149676	0.646823	0.364812	0.709291	0.5559	0.783717	0.698471	0.559227
cg06572160	0.0411888	0.389413	0.591202	0.0223504	0.365141	0.534868	0.047472	0.049488	0.120022	0.192174	0.0558097	0.0411471	0.364918	0.41414	0.424821	0.0498363	0.534563	0.0159317	0.0233461	0.0781327	0.0359588	0.0265174	0.0756626	0.0477118	0.036448	0.0368792	0.0586302	0.0823402	0.0854596	0.0629248	0.229974	0.30692	0.0280484	0.0494468	0.0789713	0.0188401	0.0230823	0.499981	0.0410267	0.0409209	0.701519	0.0527973	0.0300796	0.0331925	0.0714219	0.0624483	0.431688	0.66278	0.56625
cg19064258	0.364367	0.208776	0.0829848	0.0863213	0.0824714	0.673866	0.305026	0.117227	0.124311	0.154147	0.174359	0.469949	0.286632	0.144788	0.6243	0.288399	0.742376	0.508365	0.491406	0.4402	0.114466	0.63692	0.272915	0.293941	0.0785615	0.0790568	0.103855	0.138278	0.12032	0.534976	0.224144	0.165662	0.290242	0.65709	0.0947084	0.0729404	0.107682	0.0878143	0.261486	0.0566872	0.796316	0.541413	0.66243	0.0657387	0.0622531	0.0724354	0.0470454	0.134491	0.74048
cg05982504	0.539265	0.819553	0.845911	0.262196	0.95707	0.60961	0.782765	0.762577	0.677998	0.658371	0.572008	0.378397	0.491913	0.961603	0.600157	0.260557	0.811421	0.878637	0.679187	0.872694	0.452152	0.318447	0.476976	0.506626	0.746509	0.600561	0.586308	0.71206	0.910624	0.552726	0.456508	0.346768	0.921455	0.866484	0.897034	0.925824	0.878717	0.237032	0.703307	0.547897	0.380085	0.585698	0.549609	0.907302	0.494766	0.870399	0.147686	0.574933	0.822899
cg25596297	0.440396	0.209104	0.45618	0.35517	0.362506	0.309387	0.265396	0.0456356	0.0533214	0.182157	0.74939	0.276017	0.174892	0.700954	0.106561	0.909173	0.628252	0.117462	0.570938	0.296771	0.109751	0.687558	0.237545	0.383217	0.465143	0.183606	0.703392	0.144965	0.148244	0.458255	0.315602	0.48312	0.171609	0.702617	0.400426	0.237115	0.0816598	0.0530507	0.0909901	0.816914	0.831424	0.436697	0.20853	0.0799394	0.417513	0.0650642	0.5552	0.640202	0.671159
cg14141399	0.633668	0.216465	0.207669	0.617925	0.316108	0.433426	0.483761	0.107682	0.512331	0.226315	0.423464	0.402208	0.4402	0.0778214	0.240558	0.115129	0.156477	0.898921	0.766252	0.362599	0.327616	0.119706	0.342137	0.17892	0.150013	0.42534	0.227642	0.324652	0.305132	0.494658	0.756444	0.881904	0.692151	0.50766	0.377089	0.191218	0.393128	0.150389	0.343165	0.248963	0.0605158	0.734608	0.291955	0.398481	0.388781	0.140404	0.0635871	0.59941	0.506932
cg01565918	0.918962	0.664993	0.709986	0.924134	0.963475	0.935835	0.898884	0.677831	0.857103	0.924459	0.827891	0.915204	0.81729	0.716371	0.95755	0.727542	0.809952	0.770581	0.906794	0.891214	0.946717	0.94232	0.906879	0.316013	0.813608	0.822392	0.438822	0.914421	0.473502	0.109557	0.948786	0.899868	0.735377	0.653858	0.947081	0.960067	0.947984	0.968153	0.806859	0.809895	0.641898	0.910538	0.744182	0.228507	0.918818	0.156477	0.323968	0.926398	0.230236
cg06550629	0.832056	0.898102	0.311678	0.707388	0.813044	0.907386	0.412998	0.199213	0.719473	0.688391	0.878239	0.877085	0.322847	0.0984445	0.925774	0.907801	0.536707	0.868135	0.515496	0.630037	0.921305	0.775902	0.811626	0.185312	0.69815	0.631074	0.256567	0.413192	0.459104	0.843181	0.649599	0.582721	0.886898	0.880551	0.829913	0.407029	0.334789	0.341624	0.328492	0.599956	0.591611	0.660363	0.518657	0.407936	0.472229	0.385894	0.266444	0.784026	0.90624
cg04660410	0.0184903	0.0129752	0.542047	0.0384044	0.0100394	0.0171606	0.0109094	0.4106	0.546811	0.0122512	0.0089742	0.00884651	0.0257003	0.019287	0.0280778	0.0216411	0.0230595	0.0199361	0.00977765	0.141436	0.00771835	0.153521	0.0133136	0.0166133	0.826163	0.0145419	0.591894	0.014163	0.0384764	0.0107306	0.0217955	0.0122749	0.0166459	0.854234	0.17724	0.00740905	0.0102948	0.0307892	0.014572	0.802527	0.0121858	0.00574589	0.0732161	0.00874728	0.0139148	0.393829	0.751203	0.0175734	0.0137
cg01366419	0.395877	0.0394802	0.0331463	0.0335956	0.128865	0.4542	0.108033	0.0434509	0.130352	0.139245	0.0842307	0.050123	0.218719	0.282789	0.677339	0.282704	0.73866	0.0251651	0.0549693	0.371999	0.0720134	0.0265623	0.127629	0.0869599	0.056231	0.0338646	0.113481	0.105664	0.0520718	0.0941003	0.503714	0.0926108	0.624202	0.839768	0.0892219	0.0468722	0.0842553	0.0579222	0.057485	0.0632715	0.772946	0.602366	0.374324	0.0670217	0.0336085	0.0771075	0.0468161	0.211972	0.691485
cg22851319	0.0605636	0.063774	0.043367	0.0556846	0.0589287	0.0687667	0.0851641	0.995279	0.0641158	0.0646431	0.0451725	0.0543146	0.072772	0.0956385	0.0626262	0.0768492	0.0525062	0.0574065	0.0489112	0.0354052	0.057685	0.125224	0.0573738	0.0735961	0.0588692	0.0513803	0.0850645	0.0735961	0.0640092	0.0493533	0.0614308	0.0907738	0.0618114	0.0371692	0.110003	0.0807809	0.0873904	0.0611252	0.0763794	0.0597068	0.0599243	0.0599739	0.0703898	0.0530609	0.0570324	0.0456994	0.0490495	0.0635871	0.99596
cg24516901	0.269053	0.215516	0.73103	0.80388	0.041263	0.189079	0.625792	0.51002	0.0839763	0.474598	0.110999	0.538668	0.738798	0.80047	0.0641301	0.033742	0.504607	0.503615	0.252991	0.595609	0.693041	0.405289	0.721157	0.375126	0.0999587	0.76216	0.765292	0.359975	0.603227	0.0327323	0.514568	0.906371	0.0787628	0.141699	0.520188	0.761188	0.204154	0.310735	0.149259	0.529853	0.0366552	0.716535	0.14076	0.14242	0.832387	0.276467	0.25396	0.703783	0.160118
cg08431931	0.524636	0.20934	0.304345	0.927456	0.309866	0.157933	0.751539	0.297825	0.227792	0.423675	0.469846	0.231054	0.226921	0.703047	0.151619	0.375557	0.3271	0.385688	0.368273	0.440496	0.189284	0.314717	0.333413	0.674424	0.149259	0.379992	0.892373	0.348947	0.257095	0.291955	0.15335	0.199057	0.760651	0.174217	0.119015	0.32513	0.352802	0.579952	0.462168	0.938744	0.184703	0.257182	0.234026	0.91215	0.32513	0.489394	0.237378	0.181346	0.256741
cg11668923	0.0775014	0.0766732	0.0199808	0.0403836	0.126427	0.656363	0.0528245	0.0358287	0.0759151	0.0826648	0.0474804	0.105702	0.194494	0.0280484	0.118729	0.0499192	0.702144	0.0387364	0.0405315	0.0374239	0.0564543	0.547202	0.0217266	0.0757608	0.0404975	0.043516	0.0582484	0.112174	0.039175	0.81655	0.693699	0.0444313	0.490919	0.261136	0.0577414	0.0162807	0.0779256	0.0270278	0.0513251	0.0680337	0.0480758	0.656812	0.119506	0.0178167	0.0394203	0.0761235	0.0301254	0.0691321	0.780101
cg18702197	0.600452	0.258406	0.743007	0.157163	0.543355	0.138278	0.114672	0.210904	0.316784	0.364476	0.666829	0.192174	0.587947	0.86595	0.458579	0.0980063	0.775776	0.244539	0.170745	0.637009	0.222975	0.095404	0.10563	0.822489	0.174829	0.554267	0.218892	0.416777	0.0729224	0.342032	0.474698	0.522942	0.487836	0.391875	0.261486	0.208372	0.247299	0.125901	0.606608	0.686073	0.4204	0.610371	0.530915	0.0956669	0.604311	0.128535	0.212431	0.46178	0.306055
cg20449692	0.0397863	0.090263	0.0994863	0.00638674	0.0377917	0.620536	0.0248444	0.0222889	0.105804	0.0278738	0.0238814	0.00957014	0.177046	0.848226	0.0164381	0.00857918	0.146159	0.245895	0.0156276	0.416183	0.0240335	0.827845	0.129464	0.0901843	0.00889932	0.00721024	0.0586184	0.0508933	0.0746105	0.0116001	0.0304485	0.0644157	0.179117	0.0162904	0.0245242	0.0243361	0.0407832	0.0453232	0.0177212	0.339633	0.0268492	0.0152413	0.367759	0.0212385	0.00867166	0.0264655	0.658722	0.0212385	0.228736
cg27461196	0.689369	0.803819	0.324939	0.29375	0.666129	0.739788	0.347802	0.40662	0.604204	0.487527	0.284257	0.129139	0.304163	0.895693	0.692151	0.17281	0.620356	0.442601	0.274408	0.687558	0.307476	0.420497	0.284439	0.459005	0.356918	0.226074	0.374224	0.469741	0.709034	0.860537	0.453074	0.278418	0.479652	0.835461	0.592947	0.35242	0.468077	0.246169	0.23153	0.666829	0.913151	0.788933	0.460422	0.452152	0.606394	0.626349	0.18078	0.867837	0.835461
cg23130254	0.521511	0.533277	0.726405	0.088045	0.440496	0.603798	0.446834	0.465143	0.548417	0.321217	0.738093	0.392621	0.49846	0.696256	0.671061	0.780967	0.644252	0.620356	0.526308	0.382172	0.197606	0.766313	0.266534	0.707934	0.361884	0.202074	0.592671	0.148571	0.460231	0.710898	0.314622	0.533574	0.442911	0.824618	0.637009	0.347082	0.150389	0.482608	0.743838	0.801201	0.821176	0.492736	0.789048	0.235144	0.415759	0.331	0.717877	0.252991	0.641987
cg18267381	0.543773	0.520281	0.556588	0.651857	0.227314	0.638883	0.293359	0.369616	0.734453	0.207428	0.642447	0.320913	0.233087	0.0778848	0.754657	0.372718	0.627232	0.630976	0.609819	0.10132	0.199573	0.703625	0.21213	0.166277	0.771408	0.140307	0.715204	0.273105	0.625987	0.736694	0.410302	0.18747	0.310359	0.587283	0.160946	0.192774	0.188104	0.491623	0.162946	0.178246	0.711591	0.410692	0.86506	0.471108	0.127531	0.585414	0.131813	0.193702	0.569795
cg17279839	0.161959	0.495091	0.732106	0.149203	0.622025	0.575429	0.0404856	0.0434643	0.245117	0.289155	0.513633	0.455132	0.197686	0.56786	0.100363	0.0525993	0.587089	0.170105	0.154443	0.379535	0.0622114	0.514568	0.317077	0.117387	0.0598276	0.0671458	0.600737	0.154273	0.206637	0.406311	0.25831	0.493529	0.452661	0.0245956	0.32503	0.135257	0.142522	0.590797	0.707859	0.77726	0.797726	0.500791	0.66768	0.176378	0.564642	0.0842307	0.426352	0.0654605	0.510335
cg16608652	0.125717	0.384451	0.750691	0.709916	0.490018	0.764527	0.668206	0.734888	0.47414	0.167481	0.79121	0.704175	0.563006	0.73917	0.680856	0.879108	0.597536	0.808361	0.300456	0.313943	0.580949	0.743485	0.499152	0.648548	0.792607	0.257002	0.64075	0.318654	0.640923	0.046613	0.280661	0.428878	0.677831	0.795358	0.703864	0.62703	0.572806	0.551119	0.528505	0.679109	0.145636	0.402726	0.558909	0.537232	0.642638	0.675763	0.156234	0.308992	0.165901
cg23129478	0.15824	0.475829	0.0122329	0.224811	0.252823	0.409746	0.355657	0.765026	0.0294216	0.253157	0.377777	0.574529	0.157448	0.444095	0.81915	0.0298586	0.58523	0.417299	0.0628572	0.238138	0.0574065	0.833895	0.455038	0.440396	0.36765	0.077602	0.488274	0.0237308	0.174145	0.71082	0.375447	0.701283	0.238052	0.707544	0.0951885	0.463269	0.0341146	0.288104	0.0603173	0.877288	0.688892	0.205814	0.208868	0.218963	0.130406	0.272188	0.718035	0.432423	0.550333
cg23851011	0.46705	0.628252	0.185455	0.221787	0.273664	0.135748	0.287496	0.637865	0.337237	0.506244	0.270335	0.147741	0.233757	0.865724	0.403774	0.33292	0.272637	0.351592	0.205889	0.437299	0.189079	0.792377	0.238052	0.586089	0.591611	0.366611	0.80064	0.462877	0.905822	0.672976	0.339425	0.151895	0.904798	0.35432	0.584523	0.445665	0.387957	0.17055	0.240988	0.829214	0.764966	0.19603	0.223838	0.482276	0.49521	0.456406	0.258846	0.251499	0.89839
cg09873258	0.506436	0.660995	0.780879	0.399585	0.375026	0.80509	0.793507	0.498145	0.683686	0.602276	0.678588	0.695686	0.393933	0.911683	0.883152	0.648626	0.646554	0.6243	0.443566	0.363335	0.262832	0.953501	0.737569	0.528005	0.393128	0.302983	0.458473	0.211427	0.231054	0.885886	0.521177	0.651595	0.649244	0.75364	0.767746	0.125224	0.653858	0.798907	0.698866	0.693244	0.644073	0.399695	0.620165	0.442198	0.667249	0.192174	0.119748	0.162632	0.691152
cg25995212	0.793964	0.904065	0.624479	0.810441	0.794368	0.658811	0.817135	0.70531	0.478317	0.923934	0.522503	0.889362	0.92101	0.479652	0.106421	0.60914	0.880427	0.551438	0.873374	0.830534	0.804095	0.153462	0.863512	0.557996	0.432524	0.929074	0.431688	0.849353	0.823659	0.670726	0.87253	0.366611	0.904515	0.873534	0.609819	0.57675	0.775526	0.397286	0.395484	0.234362	0.229791	0.788569	0.656086	0.345544	0.828916	0.395673	0.746932	0.867884	0.858324
cg02624705	0.0588183	0.625401	0.547996	0.177971	0.0811473	0.446834	0.0249804	0.0745897	0.0800881	0.346156	0.688228	0.124132	0.0579918	0.395279	0.460834	0.031918	0.691908	0.570525	0.0366283	0.373926	0.10679	0.466757	0.215363	0.501006	0.614207	0.0341312	0.0893262	0.147912	0.509728	0.525803	0.402726	0.233172	0.41414	0.806974	0.142474	0.430185	0.0717382	0.0308835	0.042202	0.286908	0.811725	0.0309868	0.566343	0.236093	0.316472	0.0538715	0.282618	0.0693437	0.501559
cg11738543	0.114166	0.615554	0.0849685	0.27665	0.114087	0.570204	0.647725	0.185455	0.116534	0.101416	0.652317	0.652228	0.305601	0.69752	0.0555586	0.170172	0.709916	0.290242	0.678179	0.445565	0.194417	0.723336	0.39908	0.743551	0.110957	0.287663	0.0702248	0.178246	0.0904517	0.660177	0.476038	0.340212	0.0625693	0.119946	0.599492	0.108741	0.161007	0.22473	0.064103	0.551438	0.819098	0.458361	0.307676	0.73103	0.182224	0.0539121	0.724562	0.139689	0.630311
cg02148642	0.204798	0.293359	0.773265	0.464648	0.643001	0.186311	0.765411	0.792377	0.282019	0.237711	0.488178	0.296021	0.389201	0.212431	0.0559909	0.605528	0.469846	0.292622	0.21128	0.853672	0.3623	0.344834	0.633398	0.48481	0.669352	0.502516	0.743282	0.719804	0.816401	0.0733453	0.230653	0.611045	0.671581	0.192848	0.400115	0.420187	0.435186	0.177503	0.630582	0.172221	0.0650642	0.2184	0.353864	0.717959	0.202749	0.481127	0.800258	0.234195	0.148188
cg09937039	0.215438	0.394675	0.195264	0.809895	0.0588061	0.62665	0.78048	0.72123	0.140198	0.157743	0.462582	0.609914	0.521722	0.653036	0.122923	0.0458586	0.363532	0.730955	0.702144	0.414231	0.624762	0.553449	0.745834	0.615643	0.60789	0.692969	0.622504	0.332252	0.48123	0.131058	0.219764	0.717799	0.139838	0.136496	0.629017	0.494465	0.193774	0.329702	0.244051	0.58115	0.196252	0.379118	0.311581	0.538149	0.726102	0.603594	0.585034	0.326791	0.227642
cg09851465	0.215906	0.450415	0.686826	0.278615	0.407739	0.100211	0.0926871	0.359865	0.127209	0.387957	0.085576	0.160057	0.173886	0.0503593	0.64075	0.0313951	0.12491	0.0939617	0.112024	0.423995	0.106392	0.0800654	0.0836976	0.100363	0.0744974	0.292715	0.078908	0.387338	0.0889566	0.626261	0.208148	0.0776801	0.0806495	0.0571935	0.124833	0.138278	0.125947	0.521944	0.195486	0.56115	0.815969	0.442302	0.348323	0.105916	0.0943305	0.208465	0.813093	0.504501	0.794539
cg22909609	0.299254	0.605056	0.775776	0.76741	0.506347	0.633221	0.676906	0.582721	0.408031	0.279773	0.427709	0.63145	0.599492	0.583635	0.292147	0.0472946	0.275356	0.450019	0.597341	0.661176	0.846321	0.331859	0.398265	0.130014	0.473689	0.602944	0.532729	0.247479	0.768153	0.477393	0.204013	0.497928	0.292902	0.158894	0.647078	0.774847	0.678926	0.492931	0.363746	0.217991	0.728982	0.270161	0.187325	0.671861	0.757588	0.328599	0.622025	0.433128	0.236266
cg18534730	0.740772	0.294313	0.260946	0.541734	0.704256	0.408255	0.690209	0.424391	0.406311	0.801636	0.412685	0.825346	0.645267	0.160537	0.156545	0.308346	0.256387	0.877167	0.610471	0.501664	0.557007	0.163712	0.611141	0.443982	0.432322	0.612195	0.252548	0.73239	0.349671	0.229791	0.810389	0.554596	0.209572	0.177503	0.337527	0.227952	0.723259	0.850775	0.497874	0.2145	0.686158	0.775031	0.580949	0.322562	0.300635	0.41101	0.203517	0.337728	0.607358
cg23089840	0.136157	0.19419	0.324652	0.319163	0.377402	0.0959059	0.805473	0.569133	0.118189	0.153893	0.360875	0.31205	0.125717	0.101918	0.732769	0.301421	0.0885746	0.233848	0.263105	0.131152	0.245199	0.595812	0.664192	0.162761	0.0701909	0.221295	0.129464	0.195045	0.445989	0.824124	0.527608	0.109861	0.161007	0.626545	0.0818333	0.145731	0.114709	0.26794	0.106822	0.0848605	0.68831	0.338131	0.691571	0.500184	0.0874655	0.098748	0.833895	0.429773	0.752896
cg13861644	0.75535	0.927456	0.317077	0.905541	0.788339	0.517489	0.66883	0.452062	0.89332	0.842079	0.95755	0.738165	0.961421	0.886981	0.943898	0.963096	0.921733	0.452152	0.824618	0.573605	0.8585	0.918675	0.653765	0.792607	0.244131	0.760776	0.62298	0.81178	0.888288	0.917518	0.584015	0.960644	0.888167	0.260462	0.748641	0.932327	0.751271	0.972206	0.916818	0.265046	0.827	0.632272	0.855308	0.98098	0.765846	0.591395	0.944449	0.647814	0.804588
cg12788467	0.123721	0.105837	0.430614	0.320022	0.144739	0.0677382	0.158958	0.710368	0.0975587	0.355565	0.0645888	0.263572	0.129419	0.043367	0.634141	0.792377	0.0699401	0.0860352	0.0881978	0.0748182	0.106118	0.604582	0.571636	0.655479	0.762439	0.20965	0.369515	0.107129	0.111878	0.159202	0.0985369	0.191146	0.0558295	0.0458519	0.23259	0.400831	0.240735	0.314717	0.786571	0.805032	0.350675	0.0992438	0.294781	0.536804	0.0987185	0.116742	0.759861	0.0982871	0.580344
cg14329157	0.324556	0.663482	0.146444	0.631074	0.0859863	0.453895	0.578544	0.164777	0.0971907	0.191295	0.625987	0.391875	0.143421	0.765026	0.73103	0.0530042	0.759465	0.893105	0.148639	0.314622	0.213151	0.254045	0.0853366	0.671756	0.100487	0.122451	0.076556	0.167116	0.292536	0.727901	0.0919895	0.260011	0.380085	0.780674	0.382483	0.133497	0.130352	0.858623	0.0811234	0.500684	0.576424	0.132469	0.326591	0.574933	0.104888	0.59471	0.580637	0.416566	0.648459
cg02757432	0.333604	0.732769	0.749954	0.151895	0.336334	0.734964	0.307968	0.228254	0.784079	0.353227	0.893728	0.705472	0.354572	0.690454	0.718494	0.807884	0.787461	0.142221	0.346057	0.559227	0.295926	0.452345	0.296471	0.659454	0.0956961	0.308432	0.759665	0.207669	0.750827	0.712362	0.427082	0.156119	0.641284	0.860235	0.301024	0.207761	0.608848	0.296865	0.472962	0.392412	0.826898	0.672454	0.749324	0.109115	0.103084	0.694038	0.0879675	0.574733	0.692067
cg03665457	0.345845	0.104713	0.249143	0.101384	0.153462	0.0387196	0.275655	0.0292357	0.103154	0.0246013	0.0319439	0.0427529	0.0228309	0.318552	0.028572	0.0192034	0.0756227	0.12176	0.0295445	0.341624	0.0636266	0.00886727	0.0143531	0.0220431	0.0462175	0.112024	0.0338197	0.27106	0.0863457	0.0122329	0.0425759	0.732998	0.267586	0.642536	0.0810135	0.11221	0.068174	0.368579	0.872734	0.0256404	0.0251993	0.19572	0.0296245	0.039296	0.0431756	0.690991	0.0231955	0.0511232	0.0446008
cg08504583	0.721078	0.551016	0.850944	0.145951	0.612661	0.659524	0.799814	0.511921	0.665257	0.795052	0.560319	0.201243	0.549001	0.903119	0.0886259	0.481349	0.846493	0.343256	0.493735	0.806216	0.290705	0.785462	0.812673	0.69166	0.90529	0.547603	0.644252	0.898802	0.85763	0.151566	0.790932	0.686567	0.345447	0.464735	0.485996	0.465337	0.69872	0.919361	0.336924	0.532944	0.265912	0.764722	0.560422	0.833364	0.687226	0.612012	0.87216	0.797291	0.366327
cg00393585	0.108174	0.497501	0.111684	0.0705575	0.122277	0.379872	0.159313	0.134976	0.0902229	0.0567899	0.438308	0.0667459	0.0839292	0.0881711	0.0718943	0.0918536	0.79745	0.748641	0.12541	0.0993033	0.0794196	0.0929044	0.114709	0.0922626	0.119828	0.084824	0.209805	0.0732561	0.063221	0.492837	0.0408003	0.0766732	0.27106	0.35845	0.0397478	0.0944984	0.101098	0.0907738	0.199859	0.085555	0.778359	0.133317	0.422261	0.157809	0.10145	0.119302	0.104282	0.03995	0.318447
cg17356733	0.878239	0.730722	0.630216	0.912489	0.866776	0.683103	0.730237	0.56189	0.844404	0.767746	0.600256	0.817599	0.669534	0.0909131	0.844404	0.568836	0.65819	0.881283	0.842994	0.459401	0.826561	0.887756	0.653858	0.382172	0.795755	0.884853	0.750021	0.715591	0.408558	0.876268	0.806702	0.863668	0.149611	0.889083	0.571144	0.730047	0.695846	0.850554	0.724192	0.691067	0.722611	0.898884	0.722069	0.264581	0.870663	0.3725	0.608848	0.876229	0.877863
cg16501028	0.938201	0.81941	0.865019	0.324652	0.258846	0.868782	0.352123	0.688391	0.33031	0.86132	0.565053	0.223159	0.483232	0.792719	0.452754	0.207998	0.88825	0.4427	0.453372	0.876437	0.369002	0.282427	0.475014	0.844002	0.973348	0.61822	0.565459	0.658278	0.450734	0.952189	0.924317	0.629652	0.600452	0.924317	0.386592	0.416566	0.426058	0.936732	0.344127	0.803361	0.847101	0.873246	0.642822	0.431594	0.505123	0.619288	0.867151	0.908555	0.949248
cg17741572	0.664724	0.41524	0.823921	0.209893	0.214724	0.382379	0.227952	0.32513	0.380714	0.773137	0.342762	0.176378	0.338318	0.938681	0.542976	0.071067	0.33138	0.436223	0.284076	0.887583	0.311771	0.658088	0.311279	0.491623	0.919409	0.638055	0.537617	0.876102	0.784574	0.807085	0.663122	0.205194	0.8509	0.161484	0.339722	0.252729	0.341838	0.20422	0.273196	0.491406	0.904414	0.756046	0.222478	0.27928	0.406518	0.612661	0.902994	0.619967	0.505424
cg25573386	0.626545	0.769867	0.353326	0.246082	0.40662	0.664805	0.49182	0.394675	0.244298	0.548308	0.520872	0.802735	0.699731	0.845594	0.329602	0.223576	0.758058	0.188643	0.254217	0.734608	0.411218	0.147741	0.56625	0.698936	0.1952	0.501446	0.106754	0.454833	0.517067	0.7857	0.697756	0.124787	0.775463	0.78691	0.45114	0.127391	0.264302	0.490503	0.145354	0.130649	0.358359	0.718035	0.166782	0.194884	0.522272	0.225669	0.655916	0.82264	0.752128
cg17031727	0.161369	0.0539819	0.166033	0.0397316	0.0887777	0.123139	0.403556	0.259923	0.0381395	0.157685	0.0296566	0.294313	0.280098	0.161901	0.230812	0.0162854	0.0570773	0.0256124	0.370236	0.0628427	0.129652	0.467971	0.0383141	0.0441538	0.117302	0.145185	0.0334733	0.07132	0.0362144	0.351544	0.428142	0.054489	0.0403892	0.756976	0.0435091	0.0361524	0.0724165	0.281193	0.0228879	0.0379893	0.822591	0.046809	0.110704	0.0336249	0.0288744	0.0180547	0.745372	0.102375	0.655916
cg22627427	0.647078	0.823137	0.839183	0.31885	0.899571	0.232758	0.885733	0.924696	0.937574	0.449669	0.790018	0.226225	0.419551	0.842309	0.857142	0.841751	0.432116	0.844182	0.910763	0.502704	0.328599	0.813758	0.29744	0.443349	0.929174	0.615447	0.894248	0.877	0.885184	0.883592	0.433019	0.632361	0.93139	0.220407	0.641633	0.946901	0.671061	0.938852	0.548217	0.904712	0.936338	0.253876	0.687985	0.634969	0.81346	0.916678	0.886573	0.303685	0.911936
cg21898046	0.751934	0.667	0.099663	0.493231	0.818899	0.74224	0.886529	0.907386	0.864469	0.668206	0.680856	0.883754	0.564849	0.734381	0.907302	0.443019	0.798229	0.907991	0.35955	0.657544	0.529961	0.54387	0.1952	0.841705	0.593636	0.617454	0.620356	0.216775	0.323124	0.88347	0.730798	0.840602	0.617094	0.908515	0.866823	0.900848	0.785164	0.928771	0.86443	0.923074	0.0918285	0.750021	0.704408	0.807401	0.889156	0.870706	0.916772	0.795413	0.765647
cg08634024	0.968458	0.813758	0.423995	0.704408	0.460329	0.606198	0.919459	0.678673	0.877454	0.950118	0.252823	0.953584	0.884686	0.747363	0.651138	0.609914	0.411618	0.892151	0.934098	0.912068	0.712362	0.582924	0.70658	0.391254	0.66008	0.966934	0.540989	0.895105	0.704175	0.855877	0.935072	0.569177	0.862779	0.84667	0.783717	0.402325	0.896546	0.641284	0.67551	0.499889	0.316875	0.959471	0.584928	0.320316	0.602458	0.417905	0.221787	0.916438	0.905415
cg17829936	0.498354	0.325896	0.580949	0.537424	0.568935	0.871647	0.897034	0.500791	0.204709	0.642257	0.482608	0.808469	0.727542	0.108347	0.515702	0.449466	0.23184	0.457432	0.695594	0.548807	0.612483	0.253784	0.621749	0.452754	0.266361	0.618124	0.242234	0.399811	0.346768	0.570308	0.73239	0.333212	0.643895	0.298298	0.818645	0.682931	0.463384	0.266088	0.351933	0.409527	0.846175	0.803361	0.233417	0.460422	0.593429	0.421615	0.698866	0.880352	0.801808
cg19712821	0.427082	0.347287	0.272461	0.390743	0.381308	0.628252	0.708713	0.750767	0.208776	0.25264	0.223417	0.159376	0.464319	0.13282	0.907951	0.263022	0.558909	0.355069	0.502891	0.472547	0.421114	0.423887	0.172158	0.261219	0.626839	0.653858	0.455438	0.296195	0.282973	0.122229	0.370926	0.257515	0.229879	0.42141	0.165532	0.810607	0.288104	0.199137	0.356143	0.611421	0.770778	0.439547	0.296471	0.761252	0.686826	0.274604	0.844495	0.362703	0.413615
cg26976437	0.720469	0.57553	0.397603	0.792607	0.93628	0.303868	0.723797	0.740058	0.891453	0.262654	0.919005	0.868384	0.62007	0.150287	0.508978	0.723259	0.313735	0.825085	0.830776	0.392088	0.270255	0.915976	0.541206	0.351641	0.0607514	0.469019	0.361395	0.605161	0.21151	0.554378	0.710746	0.797784	0.493735	0.771661	0.807829	0.575816	0.893401	0.875986	0.67792	0.634583	0.131152	0.576232	0.589992	0.83327	0.763009	0.408456	0.811938	0.756508	0.142321
cg15261665	0.286721	0.306331	0.672289	0.877778	0.711902	0.516117	0.598406	0.804588	0.742582	0.223061	0.76924	0.708018	0.623919	0.693127	0.654664	0.935072	0.632361	0.732032	0.706737	0.320602	0.407146	0.741949	0.535168	0.157933	0.584829	0.350168	0.722548	0.204088	0.631732	0.0936361	0.383629	0.768276	0.350065	0.0720134	0.685338	0.7182	0.508475	0.839768	0.6715	0.870531	0.0992727	0.368467	0.856172	0.790767	0.651857	0.707709	0.707632	0.596502	0.0545185
cg00830029	0.43137	0.244704	0.237115	0.15528	0.332155	0.604311	0.579526	0.216542	0.762361	0.204462	0.14996	0.0833525	0.330801	0.796841	0.0697841	0.187749	0.300736	0.236945	0.248682	0.21167	0.140456	0.502089	0.246169	0.25964	0.777876	0.122923	0.152963	0.419024	0.268788	0.0424517	0.185455	0.173561	0.622303	0.879966	0.758861	0.183947	0.295258	0.303685	0.209724	0.711743	0.847922	0.0881465	0.395099	0.278142	0.111074	0.217007	0.0506661	0.132347	0.110159
cg27610561	0.705472	0.919224	0.869707	0.907432	0.898595	0.851773	0.905374	0.925628	0.491113	0.539657	0.908076	0.648548	0.871994	0.718345	0.888885	0.664016	0.821274	0.878431	0.699324	0.87575	0.930674	0.806474	0.90365	0.871696	0.807619	0.882543	0.65819	0.917342	0.901815	0.194272	0.469645	0.904515	0.878155	0.815549	0.933786	0.904712	0.871696	0.476976	0.668473	0.867191	0.825609	0.376885	0.573504	0.92427	0.395186	0.821434	0.324939	0.252548	0.785108
cg19814116	0.943843	0.56412	0.44367	0.488178	0.186443	0.377777	0.762439	0.908975	0.444095	0.736694	0.663122	0.923884	0.67057	0.555815	0.259281	0.0627895	0.395974	0.551016	0.798059	0.782818	0.479343	0.866484	0.365141	0.649244	0.439133	0.859424	0.945955	0.624575	0.923501	0.505524	0.680157	0.471917	0.238309	0.350974	0.876304	0.679895	0.889323	0.706803	0.844537	0.863073	0.681946	0.771165	0.459194	0.509918	0.779042	0.848002	0.911705	0.706984	0.692553
cg25683185	0.552726	0.559714	0.768276	0.696359	0.327297	0.151129	0.613836	0.35242	0.721758	0.610276	0.394473	0.291003	0.645653	0.781441	0.662515	0.252991	0.271152	0.486813	0.419024	0.64327	0.679804	0.469126	0.759147	0.639824	0.423366	0.473387	0.452551	0.683262	0.613934	0.0933587	0.739307	0.648275	0.652044	0.245117	0.746586	0.202074	0.669884	0.803305	0.347802	0.877778	0.126556	0.353764	0.310052	0.235224	0.323762	0.293359	0.196617	0.783464	0.150554
cg26385743	0.784996	0.942495	0.77726	0.973739	0.785955	0.957928	0.948992	0.346156	0.939323	0.923221	0.902458	0.970848	0.913983	0.988269	0.922184	0.702783	0.918055	0.911596	0.72123	0.93689	0.947026	0.943898	0.963753	0.488178	0.84627	0.90574	0.498035	0.908716	0.402208	0.935669	0.924034	0.933412	0.933522	0.943208	0.948043	0.313943	0.83646	0.982006	0.384038	0.449466	0.709034	0.923127	0.765647	0.33292	0.536707	0.625312	0.95226	0.590797	0.19979
cg02192965	0.704408	0.524949	0.434474	0.906024	0.587089	0.190711	0.872489	0.680675	0.41352	0.852921	0.647618	0.819662	0.84254	0.133979	0.863705	0.745372	0.216235	0.591894	0.607265	0.31264	0.683686	0.865761	0.886293	0.688635	0.818499	0.805356	0.803932	0.730436	0.681608	0.204709	0.351356	0.625892	0.537424	0.201844	0.570525	0.761563	0.816235	0.856553	0.734888	0.320913	0.214188	0.352708	0.500486	0.436511	0.274507	0.532613	0.847558	0.366136	0.518334
cg24901042	0.0417607	0.39426	0.113003	0.536102	0.269417	0.0854823	0.0479894	0.417414	0.166474	0.0681898	0.0870562	0.392824	0.206948	0.666749	0.142704	0.0874396	0.650223	0.0281037	0.0351736	0.201034	0.285785	0.701519	0.17462	0.584523	0.160057	0.236093	0.523534	0.129185	0.481439	0.745905	0.0734515	0.567769	0.40489	0.0314217	0.337428	0.575329	0.141904	0.138522	0.160714	0.726028	0.249414	0.0459357	0.353227	0.191366	0.324055	0.0351424	0.749884	0.0432413	0.519064
cg20587968	0.624575	0.577952	0.658371	0.478535	0.551642	0.759465	0.761686	0.170993	0.342137	0.73239	0.273664	0.82234	0.704094	0.154017	0.812465	0.116289	0.446834	0.659812	0.735763	0.61822	0.318447	0.425752	0.512924	0.324556	0.61373	0.535474	0.233007	0.706984	0.224641	0.693699	0.775031	0.21128	0.641543	0.244868	0.395186	0.671672	0.794539	0.144906	0.260462	0.251933	0.782765	0.696091	0.220982	0.260747	0.791504	0.491113	0.141176	0.781786	0.743092
cg14912575	0.801088	0.651326	0.933298	0.956768	0.478848	0.88833	0.80719	0.160714	0.797613	0.743222	0.479143	0.640663	0.914421	0.833652	0.779732	0.883964	0.745905	0.969489	0.860192	0.720857	0.873157	0.180455	0.5636	0.74524	0.323544	0.718035	0.647078	0.782204	0.308066	0.944449	0.792719	0.949459	0.609322	0.65863	0.858324	0.307189	0.903079	0.394675	0.808302	0.637309	0.367554	0.818645	0.791866	0.972642	0.811832	0.573005	0.861498	0.79745	0.544687
cg17496788	0.176304	0.751271	0.539169	0.415044	0.378611	0.727542	0.23184	0.692809	0.272369	0.623255	0.546074	0.102143	0.304062	0.84458	0.341036	0.233417	0.711591	0.174689	0.781379	0.41019	0.308622	0.139035	0.716443	0.592947	0.742304	0.175092	0.340931	0.429075	0.672626	0.687073	0.48764	0.642155	0.747072	0.728558	0.48301	0.555725	0.467152	0.189439	0.267154	0.685177	0.842351	0.484497	0.512626	0.244778	0.55649	0.455868	0.732106	0.7942	0.148511
cg17586860	0.220407	0.684445	0.108775	0.122923	0.442601	0.617454	0.180926	0.291862	0.26421	0.195967	0.423567	0.234538	0.189589	0.439749	0.75249	0.328815	0.836868	0.091908	0.0934683	0.509197	0.361979	0.770128	0.589401	0.456827	0.0669767	0.141643	0.587089	0.237115	0.517907	0.64717	0.540658	0.498035	0.68872	0.751674	0.329212	0.0862071	0.259463	0.203947	0.17042	0.390158	0.787153	0.67638	0.600067	0.167795	0.335002	0.167351	0.0609627	0.200806	0.595221
cg04589904	0.0755316	0.0850645	0.179254	0.396495	0.548807	0.0553859	0.08514	0.305876	0.128764	0.0647785	0.512227	0.112628	0.141436	0.628831	0.0818333	0.153127	0.0826226	0.0603173	0.395279	0.0566318	0.122748	0.602276	0.152732	0.0724354	0.298126	0.194884	0.690738	0.085715	0.457337	0.0334885	0.0472256	0.636545	0.0423825	0.0593794	0.734888	0.337237	0.556109	0.0339018	0.0918803	0.610567	0.0905627	0.0350135	0.163122	0.135403	0.129139	0.0881711	0.194342	0.0535001	0.0517773
cg03552103	0.192252	0.648459	0.444592	0.74135	0.572409	0.71098	0.75187	0.345544	0.342762	0.286721	0.17249	0.825657	0.619594	0.400934	0.580442	0.655207	0.771291	0.188039	0.190078	0.139838	0.379317	0.176782	0.287496	0.375659	0.0507536	0.405701	0.356613	0.230058	0.13282	0.848273	0.119015	0.52363	0.208776	0.704326	0.618706	0.0938182	0.239716	0.919995	0.152293	0.127669	0.0943577	0.152412	0.285387	0.203874	0.0709974	0.279104	0.387856	0.19818	0.748789
cg16232126	0.0845675	0.464935	0.386284	0.249054	0.130649	0.564536	0.0386933	0.0357342	0.281835	0.0702576	0.0922044	0.224071	0.47414	0.668554	0.235395	0.0442067	0.622406	0.155999	0.216542	0.338416	0.085555	0.539749	0.644801	0.123811	0.0452386	0.0885746	0.12189	0.192543	0.0883958	0.11533	0.0620182	0.124869	0.457654	0.0580244	0.0710823	0.0716696	0.131197	0.05416	0.0735092	0.708331	0.729768	0.291296	0.470158	0.0737933	0.034089	0.104959	0.0704055	0.0555798	0.3831
cg15044041	0.583444	0.683853	0.670124	0.246875	0.532613	0.595115	0.500299	0.267586	0.397089	0.530074	0.262832	0.578445	0.221214	0.708876	0.736351	0.688557	0.781614	0.204382	0.28288	0.438928	0.481662	0.195413	0.358754	0.753434	0.17042	0.36713	0.197686	0.48949	0.274805	0.679555	0.596119	0.195264	0.641097	0.842634	0.392088	0.484088	0.395569	0.168732	0.369002	0.887756	0.826405	0.418595	0.468693	0.597723	0.391566	0.402325	0.249327	0.640119	0.695686
cg26620356	0.586989	0.233087	0.253433	0.654033	0.257688	0.149317	0.404485	0.639927	0.111253	0.381848	0.499889	0.770714	0.64717	0.707544	0.683767	0.174689	0.191513	0.670726	0.439243	0.280307	0.554886	0.707305	0.441981	0.627897	0.804804	0.506035	0.711209	0.195264	0.259463	0.772122	0.501006	0.781614	0.194342	0.698225	0.726243	0.667418	0.502891	0.739857	0.167924	0.352708	0.178651	0.141757	0.488178	0.349467	0.764902	0.127391	0.851082	0.200181	0.114427
cg22533573	0.0460892	0.233417	0.706737	0.0102253	0.0561442	0.671861	0.0161925	0.227314	0.0706754	0.222564	0.0299283	0.0174956	0.0875384	0.215044	0.806474	0.0238844	0.684689	0.0252261	0.0622929	0.316572	0.0252119	0.0179912	0.0566872	0.640027	0.734527	0.028298	0.321995	0.0793392	0.0635587	0.576424	0.0915056	0.397928	0.245819	0.583528	0.0412695	0.0249114	0.0562639	0.0355934	0.0256326	0.768537	0.484598	0.448862	0.249234	0.0321525	0.0186657	0.0877352	0.808098	0.122876	0.716867
cg06305609	0.383738	0.164839	0.526593	0.79587	0.744879	0.584622	0.619179	0.395877	0.460727	0.0576197	0.0926108	0.716787	0.648275	0.555998	0.619496	0.794421	0.132155	0.798382	0.23333	0.0751374	0.207176	0.761686	0.268598	0.381633	0.862819	0.399479	0.627897	0.308992	0.631903	0.0370219	0.520872	0.642909	0.151129	0.403346	0.663392	0.437784	0.139838	0.366426	0.586413	0.192543	0.030186	0.444706	0.225669	0.135069	0.234628	0.232758	0.0438993	0.113118	0.0429617
cg16240480	0.689533	0.12176	0.341838	0.653395	0.573818	0.699412	0.764202	0.814467	0.578727	0.622584	0.671248	0.890144	0.775277	0.4204	0.732032	0.391673	0.136496	0.635798	0.631821	0.265912	0.638591	0.599026	0.52537	0.0898898	0.477286	0.733531	0.377983	0.130966	0.0360917	0.201317	0.732769	0.845865	0.131007	0.471108	0.49384	0.759212	0.331285	0.702449	0.0972802	0.716443	0.379535	0.323762	0.301615	0.351933	0.624479	0.21929	0.850819	0.799814	0.144632
cg06151165	0.27403	0.636167	0.661089	0.0228202	0.0589663	0.426254	0.0234754	0.0158406	0.0657833	0.569917	0.162018	0.354777	0.101416	0.478412	0.453074	0.0214784	0.773329	0.0368977	0.442198	0.466757	0.0603404	0.153179	0.0303534	0.283625	0.010791	0.0281282	0.0277822	0.0327898	0.15335	0.706113	0.397703	0.0765753	0.473152	0.55542	0.0970725	0.0120417	0.0310905	0.0209302	0.0165673	0.122876	0.715134	0.423567	0.449565	0.019228	0.0601431	0.0628985	0.0121081	0.173354	0.597536
cg16853982	0.236776	0.666829	0.424821	0.840981	0.707151	0.450019	0.734453	0.0875891	0.27098	0.494766	0.411313	0.881365	0.687387	0.257002	0.307013	0.746586	0.487029	0.137247	0.288204	0.442406	0.662961	0.696256	0.754448	0.0979034	0.470158	0.145354	0.231134	0.185112	0.428338	0.916982	0.556677	0.423062	0.303089	0.338131	0.446526	0.0761439	0.155816	0.395099	0.485785	0.32631	0.762891	0.142371	0.166531	0.129185	0.326505	0.445132	0.123273	0.609415	0.831476
cg11009736	0.151022	0.126129	0.154147	0.487953	0.453372	0.0752118	0.591395	0.730653	0.368691	0.228812	0.10797	0.442099	0.354473	0.52599	0.0768054	0.538668	0.0835607	0.264082	0.538768	0.502891	0.298392	0.141074	0.707671	0.390254	0.196104	0.436223	0.620165	0.201844	0.558381	0.145077	0.137705	0.642822	0.102568	0.147975	0.354275	0.754518	0.414726	0.370553	0.301319	0.679187	0.0646866	0.625138	0.293941	0.569133	0.600067	0.296865	0.26467	0.180198	0.148977
cg09949775	0.105425	0.202295	0.26923	0.220333	0.112776	0.099084	0.376988	0.122971	0.584523	0.403774	0.0894286	0.535887	0.130256	0.0737232	0.629017	0.10636	0.0743734	0.131861	0.297729	0.0847504	0.34394	0.588247	0.211743	0.160478	0.549513	0.0757807	0.0729027	0.261307	0.265912	0.133796	0.0824027	0.724849	0.108002	0.0265024	0.289975	0.122617	0.183112	0.340212	0.103084	0.659524	0.0303864	0.558909	0.0765959	0.107936	0.177046	0.195486	0.0669767	0.246425	0.0754747
cg03755123	0.308903	0.672626	0.156605	0.256909	0.104924	0.636634	0.310638	0.0967737	0.335314	0.149203	0.529657	0.599582	0.33913	0.52924	0.594215	0.397603	0.75631	0.125457	0.416777	0.617094	0.226669	0.29167	0.587089	0.603407	0.108033	0.0811903	0.39426	0.139189	0.20934	0.536407	0.30551	0.28701	0.122748	0.776346	0.237378	0.178583	0.0831644	0.24789	0.150844	0.194064	0.833895	0.682256	0.609914	0.26574	0.0783411	0.0645888	0.0988955	0.40662	0.70896
cg21296230	0.369916	0.237208	0.676906	0.100818	0.257863	0.613336	0.440809	0.184564	0.29744	0.510756	0.611714	0.605617	0.342343	0.455438	0.693784	0.700228	0.455969	0.350358	0.184361	0.35605	0.176099	0.667749	0.377089	0.165036	0.112739	0.0720467	0.505524	0.140965	0.130553	0.345845	0.440923	0.529853	0.092792	0.812358	0.402627	0.0951301	0.110886	0.429363	0.0772057	0.684608	0.709599	0.483973	0.0706754	0.0988075	0.326413	0.101098	0.0503512	0.154739	0.451852
cg03882305	0.679804	0.363853	0.659724	0.517787	0.71432	0.642638	0.693445	0.242234	0.900805	0.46167	0.670394	0.766887	0.476038	0.299628	0.89461	0.854741	0.609721	0.908116	0.589616	0.667249	0.310532	0.933887	0.68477	0.453074	0.282329	0.222296	0.678842	0.525171	0.574837	0.787699	0.712761	0.5636	0.732465	0.826057	0.538768	0.409092	0.631732	0.512736	0.603044	0.904237	0.464009	0.696256	0.654664	0.921405	0.379992	0.790018	0.0315674	0.344325	0.582721
cg15520279	0.0244861	0.00992462	0.00839118	0.0147973	0.116289	0.0051227	0.00955572	0.0172537	0.0715083	0.0174228	0.0161995	0.0114731	0.0110976	0.00838125	0.617823	0.00708177	0.0188516	0.0163501	0.0144391	0.0114676	0.00757385	0.00747717	0.0654319	0.027461	0.0372756	0.0115864	0.248777	0.0380194	0.0658123	0.0116772	0.014214	0.0105776	0.00660456	0.738237	0.0327013	0.00814604	0.0139008	0.0169093	0.0319838	0.0283044	0.00670242	0.747215	0.01982	0.0176347	0.0126944	0.0738673	0.0104117	0.104282	0.510756
cg19884600	0.827708	0.789514	0.468389	0.692473	0.38538	0.347595	0.770515	0.33873	0.67212	0.919361	0.692969	0.960733	0.912235	0.160601	0.92087	0.832999	0.867973	0.627232	0.822237	0.739097	0.703703	0.144046	0.935571	0.433534	0.330511	0.906706	0.43498	0.840649	0.819768	0.948043	0.77395	0.730722	0.905822	0.612955	0.82264	0.738582	0.788114	0.415556	0.509626	0.243885	0.236266	0.722748	0.828865	0.411618	0.663214	0.400638	0.195116	0.320409	0.880449
cg01870826	0.357841	0.0703898	0.0638568	0.478317	0.128764	0.0453807	0.60772	0.0607648	0.086635	0.291099	0.0979725	0.414948	0.362912	0.0391857	0.166216	0.0445526	0.0747363	0.0418971	0.106687	0.0798319	0.029639	0.0383999	0.117981	0.0641158	0.0411182	0.0743734	0.148691	0.174964	0.0752705	0.0488544	0.205741	0.117427	0.104537	0.6305	0.0552217	0.0775833	0.0833775	0.0544504	0.0654034	0.0503512	0.0793569	0.716628	0.0672667	0.129924	0.0355702	0.179459	0.0697667	0.353864	0.0633788
cg17819635	0.266444	0.587188	0.469645	0.864341	0.756976	0.444806	0.734964	0.755539	0.252469	0.266165	0.476461	0.626447	0.435283	0.675854	0.760776	0.911207	0.627716	0.308245	0.782204	0.287663	0.609322	0.494974	0.172289	0.745574	0.571043	0.272732	0.419771	0.12232	0.501971	0.698866	0.369717	0.824803	0.32162	0.809742	0.74974	0.831626	0.455969	0.886898	0.178779	0.585506	0.470787	0.628928	0.680938	0.338823	0.365141	0.113517	0.789735	0.67638	0.72747
cg27404050	0.237711	0.164017	0.350358	0.605986	0.636063	0.140553	0.685494	0.372718	0.227002	0.27375	0.178779	0.269053	0.423776	0.0356164	0.287302	0.568063	0.124178	0.412483	0.20934	0.334168	0.177436	0.736823	0.260198	0.204798	0.697366	0.45134	0.849717	0.377686	0.647258	0.277498	0.186238	0.237545	0.329212	0.12405	0.589501	0.541519	0.486482	0.369414	0.589022	0.481754	0.111581	0.201767	0.586198	0.622303	0.408031	0.779859	0.366234	0.110593	0.509414
cg17657618	0.55752	0.605528	0.705963	0.666129	0.32513	0.597636	0.489716	0.815809	0.499774	0.521279	0.345138	0.627897	0.644252	0.53338	0.334488	0.911425	0.294134	0.468803	0.695194	0.55376	0.601228	0.766887	0.395279	0.788512	0.872647	0.739857	0.814729	0.530614	0.722002	0.582528	0.274604	0.835187	0.238222	0.27228	0.251499	0.735969	0.543773	0.436697	0.850176	0.662345	0.240558	0.345038	0.798335	0.576975	0.591395	0.353864	0.723415	0.434574	0.292058
cg14221171	0.142002	0.0974631	0.476403	0.318351	0.180255	0.285491	0.592284	0.127952	0.106148	0.193564	0.539961	0.691312	0.403556	0.468925	0.680583	0.679477	0.568742	0.866177	0.681291	0.203947	0.201844	0.490399	0.456406	0.0958448	0.134256	0.182568	0.265218	0.144046	0.0624343	0.215977	0.381405	0.318351	0.100818	0.707709	0.36652	0.309588	0.117069	0.0877112	0.0474336	0.831718	0.314896	0.162882	0.233671	0.0957835	0.139633	0.0928771	0.565364	0.237889	0.251333
cg00573606	0.145185	0.308432	0.365141	0.742518	0.518002	0.306055	0.620444	0.173413	0.282973	0.413832	0.350626	0.730196	0.142111	0.746586	0.60533	0.0501792	0.276274	0.624019	0.30189	0.239794	0.628349	0.470891	0.770714	0.184634	0.720332	0.195967	0.349168	0.276097	0.114087	0.664384	0.467361	0.362808	0.35078	0.335002	0.538149	0.436413	0.311581	0.890021	0.0972213	0.257438	0.400638	0.249494	0.143465	0.113197	0.253604	0.261758	0.556777	0.494658	0.478211
cg11325578	0.714467	0.809042	0.351832	0.5323	0.146054	0.766313	0.28462	0.334168	0.218719	0.730798	0.64952	0.876833	0.224404	0.887197	0.902241	0.71082	0.886529	0.750478	0.487228	0.464648	0.498145	0.851986	0.585322	0.481662	0.182088	0.660177	0.220246	0.247055	0.329212	0.863158	0.774786	0.743617	0.577577	0.937632	0.172618	0.825449	0.562796	0.674424	0.27375	0.912489	0.864516	0.624677	0.705878	0.459005	0.389611	0.249143	0.617186	0.735377	0.784758
cg07443748	0.222049	0.385688	0.489394	0.213821	0.597723	0.235916	0.311488	0.451449	0.445885	0.33893	0.219678	0.62798	0.402726	0.88239	0.176304	0.278615	0.262925	0.345544	0.792719	0.728203	0.301505	0.144578	0.263105	0.324346	0.647258	0.396495	0.240558	0.649939	0.839405	0.830006	0.306635	0.309588	0.723867	0.524949	0.731449	0.354572	0.69949	0.629652	0.529853	0.534448	0.714691	0.709443	0.573605	0.467361	0.330217	0.600737	0.215977	0.300067	0.488862
cg15433631	0.747709	0.695519	0.49343	0.299796	0.557007	0.679477	0.673702	0.674991	0.800748	0.640386	0.827611	0.704742	0.303589	0.690209	0.596207	0.944627	0.767017	0.807988	0.697366	0.604582	0.409637	0.772631	0.596502	0.717407	0.347082	0.320316	0.780044	0.347082	0.727618	0.733215	0.681442	0.696256	0.616208	0.837153	0.742016	0.0740976	0.440396	0.36652	0.554267	0.851812	0.83641	0.654033	0.527012	0.69925	0.502405	0.844002	0.626928	0.615447	0.665886
cg23244913	0.482179	0.752279	0.759007	0.156059	0.632654	0.518222	0.791391	0.117193	0.187893	0.357946	0.334488	0.619967	0.144525	0.72349	0.571826	0.483863	0.614481	0.229879	0.696541	0.602944	0.198696	0.829409	0.411313	0.709123	0.886207	0.299067	0.554267	0.221465	0.208776	0.476143	0.669014	0.863876	0.408031	0.870573	0.498035	0.816343	0.343063	0.0450188	0.656457	0.920682	0.893601	0.473387	0.797138	0.723108	0.689853	0.0608617	0.90641	0.571636	0.84458
cg21023001	0.348427	0.171877	0.144467	0.464538	0.562097	0.509089	0.641458	0.556677	0.175958	0.46645	0.128622	0.775087	0.481127	0.721919	0.411518	0.81432	0.154332	0.46685	0.554886	0.34636	0.557227	0.786148	0.412483	0.314125	0.763527	0.392918	0.757514	0.30692	0.207761	0.818548	0.30199	0.674345	0.120156	0.0783626	0.571915	0.762828	0.472547	0.421005	0.735171	0.335604	0.705803	0.576856	0.579326	0.798117	0.627135	0.569029	0.665436	0.482608	0.476771
cg15352315	0.11251	0.10895	0.394887	0.782383	0.529131	0.189658	0.641987	0.293085	0.173144	0.0921193	0.212285	0.675423	0.665436	0.393633	0.388355	0.15751	0.0783843	0.79215	0.343356	0.246518	0.436413	0.308432	0.555522	0.489821	0.317943	0.328397	0.60914	0.201173	0.260651	0.0950742	0.0931325	0.736766	0.0608986	0.428142	0.622025	0.641006	0.328194	0.0540405	0.146273	0.120067	0.0476435	0.0819049	0.223668	0.131723	0.121673	0.168356	0.153071	0.0814128	0.171068
cg10990993	0.457654	0.80247	0.367554	0.646726	0.851897	0.739719	0.341339	0.250389	0.814678	0.566948	0.458361	0.412483	0.478948	0.869789	0.845379	0.231208	0.861874	0.393933	0.527112	0.71067	0.421824	0.252383	0.272188	0.348014	0.348014	0.600256	0.293457	0.423162	0.276741	0.932699	0.762891	0.13909	0.854234	0.649686	0.819098	0.832999	0.573106	0.614973	0.29724	0.379772	0.913407	0.325406	0.385576	0.266625	0.655391	0.325226	0.388158	0.233943	0.313842
cg04622802	0.204299	0.530183	0.660271	0.0592048	0.391975	0.447039	0.248151	0.0982871	0.38538	0.145354	0.148748	0.296471	0.138832	0.0441337	0.23333	0.926211	0.68814	0.0672819	0.509626	0.406825	0.134399	0.0963138	0.4907	0.27694	0.452062	0.176028	0.168542	0.335508	0.53338	0.0732161	0.38825	0.167985	0.489394	0.0502743	0.463911	0.134399	0.133411	0.0658406	0.855173	0.105201	0.806096	0.591894	0.547603	0.128039	0.588148	0.124833	0.754314	0.441554	0.5552
cg22190114	0.837861	0.642346	0.373718	0.471917	0.898351	0.673702	0.371031	0.619594	0.5697	0.818259	0.365924	0.90913	0.73612	0.661629	0.283902	0.393517	0.859131	0.883388	0.927217	0.813911	0.544174	0.169449	0.474259	0.391363	0.520473	0.677074	0.45134	0.890893	0.390743	0.47006	0.86535	0.428548	0.67568	0.436791	0.315602	0.186165	0.676285	0.710898	0.513533	0.263848	0.498249	0.862694	0.713149	0.342963	0.434574	0.524234	0.664016	0.479755	0.693364
cg07950803	0.634141	0.466648	0.33283	0.733689	0.599682	0.140456	0.608366	0.323457	0.358847	0.715975	0.397398	0.700228	0.801259	0.0976255	0.268788	0.675337	0.522503	0.81457	0.861836	0.619793	0.791504	0.119177	0.822538	0.283822	0.283438	0.644801	0.434769	0.619793	0.381965	0.613247	0.597636	0.579428	0.430716	0.794368	0.692637	0.799528	0.729633	0.469741	0.487692	0.117029	0.0826226	0.471601	0.500888	0.249859	0.460624	0.478211	0.137247	0.190418	0.304541
cg24715735	0.549312	0.751934	0.298972	0.704058	0.197069	0.579428	0.454305	0.881987	0.680583	0.494166	0.163712	0.845594	0.666489	0.837339	0.780224	0.062885	0.716867	0.481548	0.756577	0.567574	0.750767	0.872647	0.674991	0.729421	0.908594	0.536	0.884333	0.246963	0.781441	0.735171	0.222897	0.684445	0.368467	0.787025	0.684445	0.7556	0.692727	0.625401	0.110957	0.885101	0.83092	0.31876	0.363433	0.601898	0.479542	0.844357	0.889692	0.609819	0.712847
cg13043509	0.154986	0.575429	0.523728	0.793964	0.475518	0.489075	0.755284	0.796374	0.596023	0.18382	0.0578078	0.754034	0.459194	0.332052	0.798965	0.727618	0.221295	0.65249	0.347287	0.18747	0.522151	0.691987	0.630311	0.666916	0.705062	0.261666	0.681526	0.100122	0.129046	0.764527	0.477602	0.811576	0.108134	0.768861	0.627232	0.680938	0.294401	0.865724	0.70539	0.690552	0.823558	0.5636	0.376161	0.833185	0.661887	0.0756417	0.792261	0.250806	0.482496
cg19125606	0.386484	0.677339	0.780608	0.392516	0.595115	0.364594	0.80571	0.835234	0.657445	0.630878	0.716052	0.37452	0.485131	0.609511	0.464648	0.506932	0.548101	0.831575	0.800587	0.582059	0.370127	0.784079	0.513331	0.562298	0.759405	0.35605	0.575629	0.5273	0.874974	0.253876	0.227002	0.566146	0.774786	0.434271	0.852024	0.781317	0.876188	0.411931	0.497409	0.62798	0.893523	0.154554	0.700228	0.804416	0.696864	0.853847	0.157685	0.287846	0.676471
cg14056644	0.117981	0.421721	0.774592	0.215823	0.220644	0.483548	0.514045	0.455132	0.172158	0.454727	0.51085	0.53476	0.289718	0.719245	0.383919	0.736489	0.818594	0.0329942	0.132009	0.573005	0.351933	0.494572	0.275748	0.385795	0.218165	0.264581	0.187235	0.567349	0.169782	0.847922	0.66883	0.46443	0.0798751	0.384451	0.548417	0.141757	0.353648	0.389721	0.616305	0.314896	0.649857	0.554267	0.579428	0.223668	0.21082	0.373718	0.574019	0.312434	0.620844
cg11984608	0.904557	0.586198	0.361298	0.255862	0.370127	0.844002	0.32513	0.275356	0.475928	0.89158	0.373218	0.230144	0.459916	0.199939	0.880312	0.139443	0.354473	0.385894	0.317256	0.726173	0.422035	0.318033	0.387957	0.560422	0.203055	0.706737	0.323643	0.859131	0.271152	0.480087	0.863073	0.287846	0.64836	0.391673	0.432831	0.422953	0.420698	0.734822	0.420292	0.375447	0.519666	0.887882	0.392718	0.371999	0.523347	0.473387	0.73225	0.8992	0.885971
cg19728382	0.909095	0.589022	0.864388	0.795231	0.910579	0.366426	0.472862	0.7359	0.8516	0.867552	0.789849	0.934098	0.926582	0.8972	0.68773	0.474598	0.313249	0.916982	0.925066	0.808251	0.886738	0.904396	0.80307	0.601805	0.244948	0.83201	0.663122	0.870029	0.888491	0.146604	0.777194	0.612661	0.373218	0.630674	0.917255	0.916678	0.898837	0.26725	0.359975	0.691571	0.448246	0.873534	0.59986	0.788755	0.796199	0.898595	0.602944	0.837813	0.358038
cg04527918	0.595922	0.468925	0.341724	0.364367	0.53317	0.548706	0.35468	0.191366	0.904396	0.554691	0.584322	0.112921	0.352123	0.366327	0.528005	0.249859	0.808986	0.790706	0.57675	0.827708	0.312434	0.25629	0.670471	0.408456	0.0447399	0.322934	0.240735	0.561043	0.372198	0.0818577	0.714173	0.731299	0.697276	0.517787	0.594122	0.289975	0.611235	0.692473	0.61908	0.655479	0.0878403	0.759077	0.405396	0.417615	0.196328	0.446207	0.0668959	0.748219	0.157565
cg26590537	0.0402913	0.34646	0.0493046	0.0487749	0.0387364	0.190844	0.0488625	0.0219705	0.153127	0.190353	0.0715791	0.612578	0.0294888	0.762439	0.359257	0.0352562	0.599956	0.564642	0.348323	0.305414	0.0630335	0.282329	0.437998	0.187402	0.0807809	0.0273918	0.0543907	0.0301922	0.0449269	0.761252	0.173413	0.0400501	0.0779043	0.793964	0.0696813	0.0369962	0.0409209	0.395764	0.0276814	0.15218	0.701757	0.303685	0.224144	0.0513344	0.0540602	0.0330674	0.110814	0.0933304	0.654846
cg26029902	0.137966	0.47006	0.12518	0.170617	0.195347	0.0897759	0.20625	0.537121	0.124387	0.125457	0.184836	0.229056	0.155641	0.753848	0.529548	0.234628	0.461361	0.121076	0.146444	0.165233	0.176517	0.531766	0.569917	0.280392	0.145685	0.174829	0.140508	0.123007	0.790821	0.533955	0.145731	0.577465	0.203517	0.559714	0.124787	0.171877	0.479652	0.497607	0.216052	0.76379	0.357747	0.120361	0.622025	0.150013	0.199137	0.216614	0.824764	0.12979	0.696706
cg07080358	0.210288	0.217254	0.435678	0.0428694	0.0222189	0.681526	0.0299139	0.0247537	0.0299996	0.328599	0.0365652	0.25561	0.0677821	0.775965	0.713693	0.019228	0.827611	0.148362	0.0189517	0.245291	0.0627491	0.0147378	0.0159463	0.519878	0.0160708	0.0213664	0.0397102	0.0402439	0.0406415	0.0360961	0.0160934	0.049668	0.626928	0.654204	0.046634	0.0152223	0.0467791	0.0154826	0.0454803	0.370441	0.725716	0.3618	0.479652	0.0216682	0.0239614	0.0139641	0.0281827	0.448437	0.0388779
cg15992730	0.511075	0.638687	0.624389	0.693445	0.303772	0.643794	0.742376	0.474804	0.120402	0.587756	0.0999587	0.109861	0.230974	0.839097	0.687226	0.552112	0.445132	0.573005	0.140655	0.398265	0.583347	0.865682	0.608553	0.155217	0.651326	0.711986	0.671159	0.135651	0.919459	0.688635	0.736766	0.812987	0.10269	0.692473	0.832908	0.104856	0.312242	0.770458	0.211598	0.624202	0.866306	0.731094	0.0746614	0.387456	0.119665	0.228419	0.847741	0.793179	0.780287
cg12781568	0.33292	0.584322	0.568366	0.12734	0.140152	0.746719	0.097008	0.51936	0.176446	0.390347	0.15218	0.0677245	0.152847	0.657994	0.404277	0.0460964	0.711824	0.161719	0.0777982	0.269136	0.090642	0.0805629	0.193136	0.744742	0.914505	0.0765753	0.296471	0.739584	0.523819	0.66384	0.552935	0.350576	0.681442	0.765155	0.13282	0.145292	0.171741	0.653481	0.0678265	0.63692	0.694614	0.352802	0.203364	0.257688	0.0753813	0.179394	0.621659	0.557325	0.622878
cg12619162	0.710516	0.514153	0.924832	0.768537	0.809471	0.3278	0.90206	0.64084	0.491913	0.594808	0.556298	0.514873	0.752	0.139295	0.424198	0.108308	0.681115	0.68102	0.69864	0.832239	0.724105	0.740266	0.545282	0.616114	0.382483	0.925824	0.685653	0.846224	0.79745	0.203733	0.557996	0.701033	0.799418	0.242418	0.606975	0.903567	0.689853	0.107793	0.471397	0.669803	0.292536	0.52924	0.571447	0.730887	0.945134	0.913336	0.896662	0.468803	0.358847
cg04353769	0.833094	0.720702	0.155096	0.452551	0.546811	0.319163	0.635619	0.49384	0.324456	0.741198	0.245895	0.6243	0.347287	0.259281	0.413832	0.63274	0.281662	0.51002	0.850685	0.708796	0.467585	0.390855	0.348522	0.230405	0.702617	0.738299	0.440097	0.549716	0.343841	0.774275	0.679987	0.406942	0.359362	0.256567	0.268411	0.156059	0.528211	0.360991	0.425541	0.336729	0.47058	0.811885	0.699412	0.21267	0.595521	0.20934	0.261219	0.841705	0.7786
cg05213296	0.522272	0.761309	0.825712	0.575034	0.178121	0.681608	0.775277	0.711054	0.729277	0.590901	0.803819	0.496407	0.298207	0.892455	0.750619	0.912916	0.792773	0.656543	0.075551	0.180517	0.776945	0.89401	0.825039	0.880843	0.922184	0.283902	0.618614	0.31581	0.16384	0.857018	0.718494	0.509414	0.719027	0.775526	0.882789	0.71694	0.833938	0.52924	0.20422	0.739097	0.535673	0.0882191	0.766374	0.727618	0.837433	0.362401	0.773582	0.763335	0.82666
cg19831575	0.0824027	0.0338485	0.215743	0.0396162	0.0445601	0.0291137	0.292249	0.0387473	0.0697485	0.152006	0.635972	0.276846	0.199428	0.0310943	0.240199	0.0181622	0.0701287	0.0130998	0.0320686	0.466245	0.122451	0.0236684	0.0870051	0.0744117	0.0130574	0.151944	0.0357721	0.0685889	0.100849	0.52924	0.71842	0.0399617	0.0246396	0.642638	0.105462	0.340931	0.128402	0.0491554	0.0717229	0.0507877	0.0278348	0.678514	0.132386	0.179787	0.0426013	0.0451867	0.027291	0.341838	0.086155
cg04623837	0.324055	0.642257	0.629933	0.120863	0.5323	0.367449	0.66305	0.11378	0.117903	0.325705	0.0629496	0.458044	0.0938441	0.502405	0.229974	0.386592	0.403976	0.247723	0.485131	0.50614	0.104572	0.753497	0.211598	0.40489	0.816803	0.221622	0.39699	0.138323	0.116368	0.359465	0.454513	0.75684	0.160408	0.791805	0.401819	0.791162	0.221549	0.0209496	0.501119	0.874463	0.884853	0.277851	0.69949	0.566434	0.579016	0.0547177	0.817796	0.51012	0.804804
cg13688966	0.312333	0.215743	0.685338	0.183395	0.133933	0.181421	0.464107	0.717103	0.203134	0.380294	0.152465	0.0965825	0.200181	0.0925841	0.192318	0.161369	0.138278	0.441245	0.665886	0.261387	0.185044	0.628252	0.180315	0.358038	0.707305	0.355069	0.158724	0.55639	0.709563	0.261758	0.24372	0.152123	0.295166	0.139633	0.788339	0.306635	0.353864	0.275748	0.18388	0.528005	0.727832	0.176446	0.314029	0.131435	0.204382	0.745501	0.306635	0.206481	0.420497
cg21269897	0.218564	0.0878403	0.507457	0.358847	0.621749	0.327616	0.263653	0.292058	0.0633788	0.166852	0.388465	0.593531	0.168418	0.646473	0.285594	0.17892	0.0933587	0.119905	0.418499	0.174422	0.161782	0.388781	0.108033	0.679724	0.649073	0.217912	0.0716329	0.113353	0.521722	0.671329	0.184564	0.163534	0.196849	0.482701	0.312531	0.743551	0.276467	0.658546	0.118933	0.789335	0.731229	0.255159	0.151129	0.377777	0.363962	0.546589	0.747856	0.11067	0.558909
cg20727114	0.0687323	0.0511145	0.464735	0.0846792	0.525062	0.0494798	0.0620941	0.475014	0.079982	0.0985667	0.0719127	0.0578311	0.0535954	0.526501	0.0352291	0.378397	0.0891164	0.045515	0.0488077	0.100721	0.0469619	0.606198	0.0866602	0.698471	0.371358	0.0385576	0.0332819	0.119055	0.142269	0.0268869	0.0570096	0.25876	0.187749	0.0482204	0.185455	0.0506922	0.117029	0.0410837	0.0999232	0.0438105	0.0248148	0.0461311	0.51243	0.0848979	0.248873	0.0541407	0.0307038	0.0342881	0.0421473
cg01580681	0.306431	0.700058	0.676566	0.110078	0.639716	0.646297	0.695846	0.462877	0.172289	0.410692	0.796539	0.570636	0.2438	0.70635	0.567666	0.661361	0.817489	0.316472	0.486594	0.448143	0.200736	0.731449	0.471397	0.756114	0.705878	0.217736	0.683103	0.201102	0.494465	0.784327	0.377983	0.299067	0.639446	0.818947	0.582924	0.29459	0.201102	0.201384	0.11251	0.648178	0.86644	0.550825	0.695772	0.13909	0.195264	0.277498	0.721157	0.352123	0.618706
cg17568996	0.485562	0.31581	0.645165	0.274315	0.361685	0.587369	0.403144	0.567349	0.217338	0.379317	0.212506	0.381633	0.235753	0.813964	0.807138	0.141275	0.367867	0.572216	0.13083	0.441341	0.201384	0.730511	0.338416	0.219446	0.687309	0.145786	0.282618	0.121159	0.621749	0.696359	0.276467	0.246698	0.179394	0.769802	0.703307	0.057775	0.256656	0.806216	0.564849	0.627526	0.826163	0.445785	0.646009	0.212358	0.638055	0.383825	0.188385	0.259549	0.567042
cg27377213	0.802032	0.750021	0.755987	0.313544	0.647898	0.679895	0.488376	0.539961	0.415988	0.723867	0.595424	0.366807	0.781841	0.778238	0.844132	0.478118	0.695519	0.317345	0.204871	0.66553	0.552437	0.763076	0.387456	0.781138	0.908076	0.730722	0.486482	0.563298	0.631074	0.876877	0.791981	0.697366	0.414632	0.87919	0.388465	0.71491	0.299533	0.823608	0.2184	0.619692	0.888208	0.863705	0.493638	0.411931	0.454513	0.408668	0.83805	0.836506	0.857896
cg09619146	0.194884	0.221956	0.590298	0.075494	0.275928	0.663122	0.523242	0.233087	0.3692	0.627526	0.618124	0.555615	0.279541	0.393128	0.483656	0.0680999	0.808417	0.34462	0.206562	0.607458	0.315501	0.407146	0.543773	0.221295	0.0683644	0.239368	0.270531	0.271634	0.144046	0.700228	0.658278	0.389958	0.19722	0.0840674	0.307103	0.519666	0.303958	0.111037	0.448862	0.660546	0.775965	0.682021	0.507457	0.520872	0.524847	0.171805	0.108775	0.274315	0.454305
cg21732383	0.127253	0.0705057	0.0686058	0.493041	0.122493	0.0443457	0.182568	0.164267	0.0954942	0.137402	0.09367	0.176304	0.4427	0.154986	0.115924	0.0598988	0.0523476	0.706282	0.127723	0.0951885	0.164839	0.234879	0.163899	0.11865	0.400018	0.185745	0.547996	0.118566	0.210055	0.0925841	0.257095	0.230578	0.0600951	0.0262075	0.158368	0.651326	0.0605032	0.127253	0.048672	0.203134	0.0298717	0.10015	0.0560912	0.298698	0.145636	0.442601	0.644347	0.673607	0.486925
cg23290344	0.527012	0.706113	0.610942	0.771537	0.713861	0.641543	0.0832393	0.635437	0.695194	0.289251	0.724488	0.70014	0.590994	0.553245	0.781025	0.890893	0.79902	0.747215	0.739719	0.552112	0.301798	0.749884	0.721007	0.708796	0.295523	0.0372415	0.665794	0.19722	0.734527	0.768732	0.646473	0.831868	0.684689	0.845731	0.660914	0.533574	0.601631	0.725281	0.467784	0.705963	0.813608	0.56432	0.819978	0.531537	0.0189854	0.777194	0.507863	0.595012	0.647443
cg17542385	0.516868	0.361884	0.300736	0.347177	0.768402	0.125136	0.584121	0.592569	0.508475	0.65819	0.213821	0.344127	0.448246	0.599492	0.100943	0.509197	0.326689	0.220644	0.74597	0.802092	0.538468	0.145786	0.207998	0.214876	0.577081	0.544467	0.552533	0.636362	0.695846	0.104312	0.328295	0.429183	0.50381	0.227792	0.297925	0.647078	0.801316	0.308346	0.776882	0.154615	0.109443	0.750447	0.735233	0.420698	0.700879	0.336108	0.267023	0.318447	0.147523
cg25915982	0.796778	0.823096	0.938529	0.372601	0.438928	0.921061	0.664384	0.735763	0.489394	0.824665	0.551438	0.267762	0.769489	0.797835	0.460422	0.0437441	0.792551	0.714691	0.395004	0.866139	0.418297	0.241332	0.52474	0.605161	0.350358	0.785287	0.686242	0.900157	0.508075	0.55407	0.887923	0.211819	0.820633	0.434058	0.449063	0.433019	0.490018	0.208606	0.341246	0.693364	0.434474	0.806216	0.60895	0.445665	0.661717	0.60772	0.790644	0.891871	0.566343
cg14015044	0.202604	0.573409	0.157743	0.0374487	0.0377015	0.479343	0.6243	0.0366191	0.0199171	0.079017	0.0390583	0.318134	0.287846	0.0224295	0.0251414	0.0150324	0.139789	0.0160774	0.030273	0.162129	0.195413	0.559714	0.0283554	0.0547478	0.0224189	0.26681	0.0603656	0.0439275	0.191001	0.504001	0.514261	0.13995	0.0421034	0.027128	0.107508	0.0480758	0.047743	0.494868	0.0205636	0.819662	0.0215789	0.0856717	0.472336	0.0432146	0.0500956	0.0233304	0.693288	0.604952	0.525703
cg15175266	0.472547	0.375557	0.822692	0.489821	0.695686	0.291201	0.840846	0.575429	0.524636	0.685101	0.783181	0.620844	0.739921	0.152732	0.118688	0.194649	0.260462	0.285594	0.519766	0.540877	0.595115	0.184151	0.772827	0.434271	0.10175	0.790479	0.281294	0.721302	0.478848	0.161007	0.374615	0.496595	0.535365	0.340844	0.53405	0.413615	0.420094	0.237545	0.41041	0.261136	0.250806	0.503322	0.393829	0.383527	0.401919	0.493132	0.556878	0.808986	0.669014
cg13877915	0.018945	0.0128074	0.0329622	0.0157939	0.0147283	0.0108326	0.0239241	0.0175757	0.0491714	0.0197619	0.0112057	0.0860584	0.0526175	0.107203	0.037948	0.0775927	0.740414	0.0197409	0.0168736	0.380294	0.0187862	0.0101548	0.034454	0.0311136	0.015487	0.0221584	0.0391699	0.0179354	0.742176	0.203437	0.0383845	0.049578	0.403346	0.517067	0.0108784	0.0157329	0.055716	0.0142344	0.0454733	0.095254	0.0408003	0.0625693	0.787877	0.0355518	0.0281282	0.0494798	0.44724	0.0199881	0.43498
cg11750883	0.789965	0.271733	0.328102	0.876024	0.636729	0.127669	0.903119	0.672626	0.227233	0.684689	0.27517	0.603594	0.564431	0.570734	0.109297	0.645071	0.228895	0.210434	0.514045	0.506524	0.636362	0.155879	0.430294	0.290341	0.552437	0.750691	0.742943	0.587188	0.484909	0.410302	0.651857	0.401919	0.413932	0.199648	0.357325	0.502996	0.543462	0.754657	0.652395	0.176914	0.0920704	0.789849	0.265828	0.278531	0.79215	0.342673	0.265643	0.369717	0.170745
cg12910797	0.447852	0.190494	0.512626	0.0822198	0.353019	0.316374	0.378889	0.114466	0.358955	0.644073	0.674741	0.0433862	0.0847279	0.89381	0.0388727	0.280661	0.201034	0.130604	0.172747	0.29061	0.124472	0.55542	0.390158	0.618412	0.715591	0.11056	0.257271	0.650688	0.142371	0.0372909	0.642447	0.0696166	0.366019	0.457756	0.274604	0.889041	0.337237	0.0839062	0.501874	0.412898	0.161242	0.591703	0.203947	0.695277	0.222478	0.466151	0.0467078	0.206562	0.0730155
cg00548268	0.524334	0.694282	0.727693	0.580739	0.709916	0.664384	0.634969	0.280392	0.643183	0.560953	0.864899	0.630216	0.345447	0.0744974	0.479343	0.738444	0.845514	0.711441	0.716628	0.395877	0.336222	0.546589	0.402834	0.817389	0.123583	0.371451	0.335904	0.396296	0.739788	0.588055	0.616305	0.31876	0.311023	0.889606	0.298126	0.380908	0.365141	0.465245	0.765292	0.449363	0.0840883	0.722468	0.605798	0.822392	0.266361	0.357325	0.0973709	0.668473	0.674505
cg06908778	0.4961	0.699324	0.709844	0.283718	0.720407	0.605252	0.135307	0.775965	0.668743	0.360088	0.812571	0.438822	0.250306	0.736195	0.645562	0.887511	0.748641	0.804693	0.302191	0.425647	0.272369	0.750691	0.286145	0.585698	0.0301111	0.238649	0.750478	0.125717	0.651513	0.550333	0.447945	0.432923	0.628928	0.790018	0.49343	0.368064	0.402017	0.471489	0.0707102	0.80588	0.830827	0.534868	0.557007	0.580344	0.376475	0.572708	0.572806	0.110373	0.666043
cg06101324	0.489394	0.225334	0.400426	0.84627	0.221465	0.129652	0.630216	0.583243	0.214657	0.595922	0.200181	0.157991	0.246963	0.74814	0.0984771	0.119946	0.17724	0.11085	0.173954	0.440809	0.292249	0.451653	0.295827	0.410302	0.420094	0.460029	0.285292	0.365726	0.60772	0.0669296	0.24538	0.194494	0.206796	0.0896452	0.191513	0.460422	0.611808	0.342475	0.205021	0.460029	0.133175	0.538043	0.403556	0.0939343	0.567961	0.290515	0.390158	0.223244	0.767945
cg05194726	0.0914007	0.172618	0.17718	0.0614808	0.202074	0.620743	0.241837	0.0676771	0.54577	0.10221	0.129881	0.0320142	0.129233	0.875304	0.0725765	0.127481	0.295719	0.102226	0.217254	0.139245	0.0461239	0.261219	0.108775	0.104537	0.687558	0.0564201	0.104119	0.15824	0.234362	0.0545278	0.107682	0.13148	0.338131	0.834624	0.842263	0.0812947	0.136691	0.0683484	0.126427	0.637487	0.820877	0.0567899	0.342243	0.128764	0.0492969	0.113197	0.0405894	0.103051	0.0557595
cg24194539	0.0140886	0.0169568	0.431897	0.0971033	0.016379	0.360182	0.393027	0.0156553	0.0200846	0.014346	0.657181	0.0222811	0.0158032	0.0444788	0.012542	0.0136176	0.013179	0.00981572	0.0105499	0.222734	0.0241755	0.0167663	0.0166158	0.67638	0.0141032	0.0222713	0.127481	0.0168399	0.0286089	0.0306502	0.016971	0.39104	0.0193974	0.0108055	0.281113	0.0220709	0.125224	0.0116304	0.0126944	0.786148	0.0157351	0.0689737	0.725058	0.0113993	0.0160883	0.674263	0.0225441	0.0457069	0.0153659
cg20663831	0.0749325	0.109048	0.261843	0.730278	0.0501041	0.421205	0.601228	0.765292	0.133979	0.117866	0.493327	0.657	0.608179	0.278051	0.775463	0.113584	0.385063	0.616305	0.735096	0.169909	0.585139	0.655661	0.653036	0.565558	0.47006	0.301713	0.356338	0.250208	0.440396	0.0683341	0.0423397	0.377777	0.117866	0.150083	0.691747	0.492931	0.633853	0.792773	0.128357	0.307378	0.162381	0.0972802	0.650318	0.0898063	0.682519	0.178651	0.619496	0.131861	0.104959
cg20008332	0.347392	0.552009	0.459916	0.087364	0.0742074	0.381216	0.0258871	0.0198129	0.0746105	0.268224	0.35418	0.44367	0.0826226	0.492429	0.38227	0.0496428	0.374224	0.0424949	0.0215391	0.37606	0.0601431	0.464538	0.0564964	0.313735	0.0112086	0.0671885	0.0364988	0.0977532	0.402526	0.633221	0.393829	0.0279515	0.342032	0.531766	0.31905	0.018747	0.0710318	0.577081	0.0375341	0.205814	0.756771	0.461883	0.375845	0.023127	0.0481099	0.0500211	0.0170675	0.339528	0.527799
cg15760840	0.11304	0.260462	0.596207	0.0780498	0.0331333	0.188039	0.242418	0.0674086	0.0614695	0.274896	0.681946	0.302594	0.0508558	0.802843	0.0687834	0.190778	0.485996	0.0189331	0.223506	0.278051	0.197378	0.627526	0.149087	0.299973	0.755662	0.0390221	0.164403	0.192318	0.0522666	0.169512	0.324142	0.680331	0.248234	0.422486	0.198029	0.06667	0.17905	0.0393673	0.024248	0.775144	0.0479618	0.404789	0.453568	0.055447	0.0566872	0.054668	0.0615324	0.134399	0.659454
cg15383120	0.495538	0.020578	0.481349	0.618614	0.0675062	0.510335	0.491517	0.621749	0.0572285	0.638498	0.767224	0.439133	0.612195	0.0207158	0.470476	0.745438	0.75022	0.772697	0.648275	0.582721	0.0285353	0.635972	0.0386296	0.579952	0.711824	0.34003	0.0263304	0.441245	0.443885	0.0449612	0.701915	0.618323	0.63164	0.0192011	0.430082	0.533955	0.643105	0.54226	0.728419	0.400115	0.721682	0.519766	0.675164	0.705878	0.621749	0.742652	0.49022	0.515496	0.0292999
cg05890484	0.48061	0.87782	0.7942	0.935072	0.755921	0.863917	0.687985	0.956452	0.387231	0.725864	0.798005	0.964611	0.633754	0.960476	0.947984	0.970207	0.940082	0.914988	0.927409	0.810607	0.733689	0.952746	0.894856	0.851942	0.450937	0.82234	0.400426	0.236867	0.885267	0.944204	0.781138	0.975071	0.823269	0.809156	0.879481	0.932023	0.725864	0.959563	0.966438	0.946407	0.949111	0.825763	0.959079	0.942734	0.873751	0.768082	0.946407	0.647345	0.950601
cg11368643	0.128453	0.685258	0.571636	0.176173	0.138625	0.517907	0.460231	0.7126	0.725716	0.3867	0.618323	0.678344	0.26257	0.708555	0.688473	0.798229	0.666043	0.0525153	0.744252	0.372819	0.381114	0.656086	0.513533	0.671861	0.601228	0.212045	0.0785441	0.260845	0.25803	0.786262	0.507355	0.801978	0.414837	0.782995	0.224565	0.1081	0.13909	0.464009	0.773401	0.0572034	0.317256	0.398368	0.74149	0.612391	0.103353	0.124738	0.675255	0.57613	0.658912
cg27043873	0.83646	0.652588	0.884171	0.636634	0.767482	0.241671	0.228101	0.755987	0.341838	0.893161	0.81028	0.81729	0.657445	0.1613	0.469126	0.385176	0.620262	0.299707	0.871318	0.675164	0.660638	0.21929	0.758941	0.873811	0.137247	0.811938	0.231368	0.831718	0.611045	0.816126	0.800587	0.43579	0.720093	0.254872	0.782262	0.20965	0.398585	0.586798	0.395974	0.154675	0.310837	0.714766	0.337633	0.388881	0.798668	0.314029	0.79042	0.817899	0.876594
cg02397720	0.373718	0.479863	0.41019	0.36028	0.218963	0.599026	0.535673	0.744879	0.446631	0.220902	0.766708	0.762504	0.682178	0.74224	0.713781	0.646726	0.247479	0.527799	0.415759	0.475014	0.317756	0.861366	0.121326	0.143891	0.728419	0.714548	0.55752	0.126782	0.733361	0.113234	0.544977	0.572612	0.217492	0.151286	0.53702	0.727766	0.46504	0.730196	0.65617	0.743092	0.0701599	0.698471	0.602103	0.46158	0.587947	0.743838	0.594808	0.469645	0.345238
cg07696033	0.237115	0.211352	0.377686	0.139295	0.382785	0.14814	0.0711832	0.0877352	0.329817	0.26794	0.379416	0.188607	0.118063	0.384451	0.420094	0.0640732	0.209416	0.215743	0.3692	0.171741	0.0170518	0.847011	0.519162	0.244131	0.289446	0.112364	0.0394633	0.380908	0.0964957	0.0695182	0.0288053	0.406518	0.0860352	0.383217	0.141951	0.0248011	0.0524391	0.517373	0.0432966	0.883428	0.172747	0.0356601	0.180384	0.267586	0.177503	0.242668	0.673607	0.326209	0.418099
cg03387723	0.820482	0.878755	0.487744	0.929877	0.628634	0.816502	0.772238	0.925774	0.764966	0.776882	0.514766	0.770906	0.844803	0.930873	0.918537	0.235654	0.875551	0.842807	0.550532	0.836274	0.923457	0.65617	0.894287	0.845825	0.20552	0.787524	0.283069	0.884813	0.421824	0.916818	0.838296	0.827845	0.855611	0.949915	0.9006	0.747778	0.894985	0.90529	0.384865	0.708414	0.929327	0.846405	0.559928	0.616602	0.685338	0.769103	0.451852	0.812257	0.746509
cg05010967	0.190645	0.396296	0.11633	0.133223	0.073092	0.559119	0.255053	0.156605	0.378295	0.513633	0.0660327	0.247552	0.25629	0.770515	0.593221	0.0389693	0.117227	0.251667	0.133933	0.454305	0.149899	0.448969	0.111321	0.134399	0.135603	0.0712512	0.113551	0.224992	0.144578	0.209496	0.173759	0.253604	0.196617	0.80509	0.33852	0.388985	0.11889	0.0494468	0.0577414	0.13689	0.0691998	0.351072	0.243263	0.0840674	0.244631	0.168671	0.138677	0.536707	0.344723
cg19242268	0.819814	0.74939	0.663745	0.27946	0.163534	0.21128	0.732769	0.570012	0.270335	0.341246	0.247299	0.14742	0.33148	0.513331	0.839905	0.0489849	0.698936	0.23325	0.239451	0.528211	0.246337	0.15703	0.306055	0.29281	0.672976	0.572309	0.445229	0.504607	0.0961681	0.838559	0.80653	0.139143	0.623353	0.867507	0.154927	0.236526	0.311101	0.563917	0.324749	0.415044	0.306733	0.808522	0.306538	0.702449	0.432923	0.210131	0.886293	0.771929	0.569917
cg05989054	0.836868	0.331571	0.470684	0.635524	0.226752	0.717178	0.683262	0.526696	0.33852	0.310532	0.435585	0.397813	0.789335	0.451653	0.897076	0.237966	0.203663	0.263479	0.309588	0.531537	0.70937	0.888885	0.681442	0.585034	0.868261	0.774076	0.477188	0.67792	0.594418	0.330114	0.453568	0.887882	0.137807	0.387036	0.426058	0.777623	0.443241	0.466245	0.640119	0.690914	0.424391	0.465245	0.573712	0.321711	0.567769	0.591799	0.954757	0.750021	0.502891
cg09053680	0.0332398	0.518657	0.0140612	0.0154625	0.0245216	0.694363	0.0486553	0.0927384	0.0914528	0.0509562	0.112962	0.567961	0.4106	0.491711	0.734822	0.0276557	0.809256	0.0130077	0.0156216	0.687387	0.00909013	0.0344451	0.0441203	0.0231583	0.187166	0.018131	0.0603173	0.0368977	0.421926	0.835187	0.0332118	0.178511	0.0489461	0.0121241	0.0285553	0.0106113	0.126427	0.0468408	0.301505	0.0211324	0.0098536	0.708713	0.0425374	0.0505114	0.206481	0.0153706	0.140356	0.268971	0.733993
cg10516359	0.778548	0.427602	0.919179	0.892883	0.962995	0.953168	0.419551	0.42586	0.802263	0.679724	0.689292	0.932646	0.871775	0.964133	0.943272	0.218963	0.574019	0.911404	0.714985	0.911248	0.933129	0.617186	0.485785	0.475309	0.414726	0.720634	0.221465	0.909809	0.494048	0.897238	0.691747	0.813347	0.751934	0.111461	0.968975	0.299171	0.829115	0.701681	0.491711	0.239013	0.48949	0.849036	0.670814	0.52537	0.684192	0.725946	0.918268	0.499774	0.626153
cg07837085	0.574338	0.235395	0.187402	0.492931	0.744117	0.696951	0.527608	0.729484	0.170745	0.471917	0.371451	0.724987	0.743617	0.308992	0.133691	0.716371	0.0981006	0.203517	0.551119	0.578445	0.533772	0.805829	0.29543	0.228736	0.724774	0.766505	0.619594	0.463701	0.799079	0.365726	0.40662	0.226001	0.110003	0.244298	0.741859	0.735171	0.474598	0.328709	0.654204	0.705803	0.574128	0.49846	0.223506	0.767607	0.84627	0.751674	0.80031	0.727832	0.794245
cg25259754	0.370024	0.722685	0.167541	0.807935	0.428878	0.155816	0.494572	0.463701	0.213821	0.469243	0.197531	0.82596	0.668743	0.0613924	0.0403342	0.731961	0.235654	0.69925	0.632561	0.4204	0.571826	0.203947	0.475518	0.172419	0.377402	0.567456	0.0705394	0.357226	0.106392	0.538768	0.184217	0.560953	0.533955	0.752	0.317855	0.757925	0.440809	0.669094	0.316472	0.580834	0.0524391	0.398683	0.551532	0.186103	0.498354	0.222645	0.120825	0.132054	0.291296
cg13398291	0.430408	0.0235016	0.0229588	0.00653505	0.0189991	0.080887	0.0281993	0.0233562	0.0305805	0.0536345	0.147255	0.211598	0.0278037	0.0123801	0.89158	0.0246564	0.684192	0.664651	0.0299632	0.224404	0.0252603	0.0158428	0.0292357	0.0158266	0.010138	0.01304	0.0399955	0.044486	0.018809	0.0102407	0.165233	0.0202241	0.0218679	0.0140815	0.0352644	0.013487	0.0233616	0.0948819	0.0244505	0.0924775	0.0132383	0.469441	0.031098	0.030697	0.0104088	0.0557688	0.0137629	0.4907	0.015487
cg21111471	0.831244	0.783064	0.764265	0.19745	0.801369	0.865192	0.897438	0.614973	0.805526	0.842634	0.273282	0.630674	0.524534	0.251333	0.880628	0.108522	0.784079	0.829506	0.654033	0.868625	0.423262	0.494868	0.70531	0.478535	0.725636	0.806155	0.299973	0.816448	0.547603	0.764265	0.851773	0.367759	0.509918	0.296021	0.538968	0.696619	0.860192	0.637397	0.286145	0.519766	0.905002	0.837387	0.402325	0.378994	0.406825	0.574232	0.196474	0.838653	0.785287
cg03104936	0.853235	0.665711	0.875056	0.210131	0.268411	0.831817	0.448969	0.53338	0.313842	0.807138	0.348848	0.14758	0.528923	0.662961	0.175221	0.154443	0.512024	0.515804	0.240908	0.80042	0.247055	0.14887	0.326109	0.360495	0.311581	0.623056	0.378397	0.767017	0.272637	0.401919	0.896136	0.234118	0.524234	0.357992	0.208072	0.281013	0.319826	0.127438	0.227792	0.398878	0.24781	0.734964	0.418398	0.273664	0.445446	0.522151	0.399479	0.903359	0.454616
cg01009664	0.129835	0.743902	0.806702	0.3271	0.688473	0.734227	0.162946	0.269318	0.809256	0.676566	0.90172	0.516752	0.302594	0.816698	0.110449	0.121076	0.840892	0.739719	0.70896	0.652317	0.240908	0.876794	0.232855	0.832951	0.899534	0.207998	0.317649	0.183465	0.654488	0.762951	0.310532	0.900682	0.685101	0.9002	0.612287	0.451045	0.217338	0.899157	0.911849	0.913104	0.862819	0.730722	0.662345	0.722002	0.740772	0.755075	0.878032	0.454305	0.723725
cg21537939	0.478317	0.782383	0.599772	0.856049	0.782932	0.815086	0.891097	0.697034	0.630037	0.481662	0.587756	0.912916	0.802686	0.836363	0.851251	0.893728	0.886084	0.752689	0.505123	0.297339	0.777133	0.67638	0.705713	0.765354	0.297925	0.631267	0.682178	0.491711	0.203798	0.946081	0.318033	0.86506	0.372396	0.882869	0.701681	0.300834	0.602768	0.943898	0.345742	0.253521	0.311957	0.268132	0.682021	0.286145	0.387231	0.4907	0.689046	0.364918	0.831626
cg27383956	0.356243	0.357532	0.415556	0.789048	0.464009	0.684445	0.932861	0.453568	0.675423	0.22945	0.552726	0.460944	0.470476	0.616005	0.3725	0.344229	0.231763	0.923934	0.571043	0.361884	0.510433	0.475411	0.430082	0.650318	0.502405	0.407639	0.705551	0.857187	0.394675	0.123051	0.237032	0.52841	0.61458	0.096677	0.55868	0.468803	0.625045	0.238927	0.604867	0.243625	0.207669	0.272637	0.309387	0.55376	0.363632	0.664889	0.174422	0.28758	0.18169
cg18919097	0.144046	0.222975	0.663575	0.567961	0.211972	0.429677	0.443241	0.524949	0.231295	0.0936082	0.588631	0.216306	0.584322	0.267762	0.0469036	0.553871	0.51446	0.64952	0.645267	0.125136	0.455542	0.66768	0.164525	0.334082	0.710598	0.183253	0.641987	0.277961	0.507965	0.0856528	0.133497	0.429363	0.317077	0.496698	0.576856	0.740127	0.64717	0.0738673	0.621153	0.647443	0.620444	0.0771666	0.549312	0.250718	0.535784	0.104443	0.640663	0.208943	0.168542
cg00077877	0.675255	0.335703	0.197155	0.172348	0.691571	0.635884	0.354069	0.505315	0.440097	0.742868	0.175646	0.678084	0.628349	0.209805	0.428969	0.411721	0.130066	0.251155	0.45156	0.624575	0.63571	0.215743	0.231295	0.307013	0.189875	0.729701	0.26794	0.541837	0.267154	0.512626	0.800692	0.25561	0.335904	0.445015	0.494766	0.602014	0.576856	0.469344	0.15703	0.291862	0.778295	0.734453	0.118267	0.461976	0.474905	0.766181	0.0965825	0.664567	0.278615
cg11965370	0.162381	0.299254	0.0441875	0.153623	0.151395	0.390743	0.394044	0.615643	0.187026	0.408668	0.688557	0.61908	0.183112	0.0962861	0.0301472	0.334583	0.674263	0.47058	0.125276	0.342762	0.30969	0.506932	0.116742	0.088599	0.672626	0.167047	0.537721	0.172348	0.458782	0.431025	0.0962281	0.0765153	0.46705	0.689455	0.18915	0.0926871	0.117501	0.0597191	0.110488	0.0615695	0.657349	0.626074	0.612287	0.0738105	0.108002	0.500684	0.0353049	0.272732	0.713861
cg21835643	0.200263	0.158368	0.625505	0.257688	0.154615	0.127908	0.24504	0.190844	0.27201	0.39426	0.170357	0.548706	0.196992	0.100457	0.56412	0.283988	0.792492	0.287302	0.565364	0.125032	0.206029	0.118977	0.357532	0.25613	0.211743	0.210988	0.24317	0.198619	0.702449	0.192622	0.162761	0.310265	0.152071	0.394365	0.556777	0.260102	0.174359	0.214117	0.448546	0.602276	0.24175	0.0921193	0.168992	0.871775	0.529657	0.857538	0.801369	0.195413	0.493945
cg23694248	0.0649528	0.352215	0.418099	0.0754397	0.0729582	0.430915	0.447039	0.0848004	0.103084	0.118847	0.583045	0.321119	0.127253	0.134831	0.699097	0.330801	0.78233	0.178053	0.0573634	0.12405	0.202903	0.768011	0.417615	0.186165	0.419771	0.0898063	0.06667	0.137303	0.130456	0.216235	0.184503	0.182494	0.308992	0.738444	0.376885	0.0744282	0.459005	0.234963	0.299628	0.083101	0.70014	0.479755	0.578544	0.239878	0.432831	0.0962595	0.0659286	0.182362	0.754732
cg25094569	0.331952	0.503322	0.730887	0.231368	0.0909131	0.650223	0.258127	0.509626	0.0883442	0.333518	0.560023	0.0733453	0.3309	0.251754	0.617726	0.077361	0.790585	0.139899	0.222564	0.450213	0.195644	0.222478	0.386592	0.807935	0.773582	0.260462	0.614686	0.101512	0.274708	0.66181	0.547202	0.556878	0.43137	0.387338	0.230728	0.216465	0.104345	0.34977	0.101918	0.757325	0.739372	0.36713	0.153071	0.284527	0.122054	0.276017	0.777005	0.365612	0.677666
cg10849854	0.67057	0.274408	0.409746	0.141019	0.253784	0.484497	0.477905	0.571144	0.216695	0.717332	0.783122	0.347392	0.639169	0.839999	0.182494	0.44631	0.3278	0.684608	0.521177	0.462377	0.278331	0.588828	0.250208	0.792891	0.432423	0.656363	0.620635	0.596608	0.527799	0.408668	0.817649	0.240908	0.224319	0.592098	0.266165	0.398878	0.260946	0.171483	0.450121	0.679987	0.347705	0.736823	0.447852	0.661887	0.704576	0.594608	0.789223	0.80958	0.202604
cg04391111	0.0336492	0.500684	0.441439	0.0111189	0.108846	0.235654	0.0214633	0.00986746	0.0278803	0.453074	0.0442653	0.018618	0.228346	0.683023	0.604204	0.0218756	0.840039	0.0100726	0.0257726	0.20625	0.0251164	0.754518	0.0400557	0.0434451	0.229216	0.0435547	0.0445882	0.0427341	0.0504223	0.104187	0.113118	0.305132	0.521279	0.488862	0.0538032	0.0172286	0.0476591	0.012925	0.0139454	0.0587947	0.0263634	0.0553543	0.0175252	0.0268903	0.035332	0.024684	0.614881	0.0622114	0.670726
cg03533858	0.227719	0.494465	0.437207	0.500888	0.650688	0.190004	0.778128	0.193489	0.829361	0.16912	0.643619	0.43852	0.620356	0.588828	0.788875	0.697922	0.473152	0.288685	0.672711	0.334379	0.692969	0.767355	0.527901	0.675164	0.59393	0.392824	0.534152	0.444918	0.383738	0.616005	0.184836	0.628166	0.659812	0.249859	0.856049	0.520872	0.854826	0.808251	0.773582	0.514357	0.203947	0.128909	0.45961	0.64881	0.358652	0.377298	0.641371	0.169648	0.11865
cg10140638	0.0504391	0.410787	0.0239614	0.0184131	0.383311	0.519878	0.0186227	0.0549473	0.0413924	0.0393288	0.474024	0.342762	0.0676184	0.0623066	0.479755	0.0647005	0.718882	0.0160102	0.132203	0.145019	0.041653	0.553036	0.0999898	0.0548412	0.0948526	0.0207256	0.0280577	0.0621467	0.103622	0.660818	0.448862	0.0350181	0.052721	0.400528	0.0736506	0.0208703	0.097008	0.0215246	0.0330069	0.0223071	0.792949	0.61939	0.562598	0.0473024	0.0710823	0.149382	0.0268287	0.0767874	0.485013
cg03958979	0.413724	0.738723	0.768402	0.135551	0.364056	0.704175	0.434172	0.151075	0.80509	0.145292	0.826561	0.608366	0.255053	0.803988	0.790364	0.711743	0.838099	0.802843	0.411518	0.708259	0.289446	0.761364	0.333212	0.848993	0.0660866	0.2145	0.394574	0.306055	0.249758	0.839097	0.579428	0.0624343	0.655022	0.874936	0.686643	0.337931	0.577859	0.416363	0.170485	0.859255	0.888567	0.667584	0.590994	0.197155	0.725501	0.754657	0.103957	0.728128	0.795289
cg09450238	0.142321	0.254961	0.439547	0.642909	0.371999	0.241412	0.55044	0.134543	0.656086	0.231696	0.40489	0.68102	0.27228	0.824764	0.715591	0.42946	0.198619	0.158724	0.202295	0.198099	0.191146	0.328599	0.531438	0.625505	0.145843	0.368691	0.604582	0.315703	0.271445	0.0964957	0.167481	0.713537	0.54577	0.0454178	0.498249	0.219927	0.356613	0.760513	0.527012	0.555615	0.0557058	0.239716	0.360582	0.262832	0.233848	0.352618	0.054431	0.18107	0.104748
cg01530101	0.305601	0.340844	0.25964	0.0427823	0.258406	0.123583	0.0289983	0.113624	0.450121	0.674424	0.774526	0.60772	0.310837	0.159376	0.202673	0.322847	0.0904517	0.0557688	0.472962	0.627716	0.176649	0.0290257	0.292991	0.419771	0.011107	0.168485	0.405917	0.371358	0.0716329	0.0958448	0.742016	0.0823802	0.0818577	0.0473493	0.162513	0.191146	0.153246	0.275655	0.597723	0.827891	0.0340559	0.823269	0.34977	0.420791	0.09169	0.616788	0.651138	0.506035	0.284827
cg05293216	0.742582	0.390254	0.484291	0.731517	0.45063	0.821128	0.40508	0.344926	0.673166	0.430806	0.317435	0.477393	0.52924	0.152238	0.773896	0.404277	0.721919	0.595221	0.770055	0.578629	0.842589	0.412371	0.457542	0.434574	0.750153	0.641097	0.412588	0.829551	0.359465	0.226074	0.650419	0.777194	0.88072	0.200571	0.266534	0.730798	0.664384	0.50614	0.529023	0.874852	0.248682	0.595712	0.585139	0.493638	0.326006	0.699097	0.175832	0.643446	0.145951
cg16616769	0.734227	0.734749	0.358847	0.199428	0.319555	0.895733	0.150844	0.431025	0.671581	0.647078	0.52537	0.152963	0.275655	0.117069	0.125717	0.124869	0.840284	0.254961	0.716867	0.783841	0.280845	0.82197	0.253702	0.319925	0.867592	0.537929	0.484291	0.835561	0.749261	0.702001	0.598111	0.158485	0.920502	0.102983	0.572107	0.418202	0.561996	0.400215	0.524847	0.774847	0.867714	0.576644	0.344509	0.176237	0.557419	0.582264	0.908635	0.660363	0.353019
cg13614083	0.834989	0.709916	0.37606	0.396399	0.307103	0.792208	0.416986	0.680771	0.807025	0.639542	0.566343	0.793797	0.407639	0.856761	0.138423	0.0921193	0.456617	0.455231	0.467152	0.447336	0.401709	0.571826	0.293085	0.555093	0.268516	0.547499	0.746653	0.589807	0.868054	0.193564	0.391254	0.195967	0.750417	0.522151	0.669442	0.485355	0.731449	0.427933	0.544687	0.682256	0.246255	0.33283	0.251414	0.346768	0.35845	0.719473	0.383311	0.412588	0.608553
cg24816455	0.282618	0.142869	0.813401	0.236007	0.301024	0.0973709	0.418398	0.485013	0.622676	0.182088	0.160882	0.200498	0.446207	0.851986	0.785108	0.0754197	0.0803256	0.756771	0.32162	0.139143	0.442099	0.146915	0.369717	0.821625	0.105266	0.415556	0.156234	0.370236	0.125608	0.121202	0.103393	0.51002	0.0555901	0.0471674	0.260198	0.194129	0.756577	0.577577	0.226501	0.247299	0.0673931	0.208224	0.0848732	0.248963	0.110449	0.324652	0.224319	0.169449	0.0756839
cg23207990	0.153462	0.0838624	0.697674	0.0399892	0.199057	0.621457	0.0447335	0.0909131	0.0925076	0.151129	0.526501	0.0919651	0.0838116	0.539169	0.0371147	0.724849	0.129279	0.0369369	0.0345436	0.460523	0.103252	0.0922044	0.285594	0.09164	0.0403892	0.0526656	0.0844988	0.104572	0.0571935	0.223506	0.513331	0.469441	0.0636777	0.652317	0.0474413	0.0710823	0.0834679	0.0982871	0.0518944	0.745574	0.796662	0.542976	0.287211	0.06725	0.082269	0.0633666	0.170683	0.165036	0.0415296
cg02665570	0.00923108	0.0887003	0.283718	0.53691	0.316875	0.250718	0.187893	0.537232	0.134731	0.0111885	0.256479	0.0127303	0.357424	0.318033	0.361199	0.0178636	0.122014	0.48918	0.256387	0.033894	0.337527	0.158611	0.261486	0.47449	0.636634	0.203055	0.139584	0.0195209	0.438091	0.625591	0.0102567	0.542653	0.146054	0.594608	0.309387	0.589401	0.197297	0.645733	0.0209171	0.0142916	0.753565	0.008473	0.611523	0.0149321	0.297825	0.307378	0.278051	0.0136036	0.477704
cg04482110	0.0153034	0.0412463	0.0189117	0.010526	0.585982	0.0281008	0.0181069	0.0264329	0.0249	0.0196664	0.0122042	0.0246097	0.0183334	0.602663	0.0185935	0.0155606	0.0354787	0.0126921	0.022789	0.229368	0.0221682	0.0435755	0.0215539	0.0393721	0.0122536	0.0205418	0.0178308	0.0209449	0.0210806	0.0180207	0.0331296	0.00931432	0.196768	0.0182722	0.0476035	0.0474641	0.0214028	0.0169336	0.0238129	0.453795	0.028337	0.0138134	0.0223275	0.0256431	0.0378158	0.46178	0.743551	0.0170949	0.0247593
cg10669058	0.352025	0.140709	0.167234	0.0495371	0.174964	0.12185	0.196617	0.671756	0.575925	0.208689	0.139395	0.464538	0.148081	0.567961	0.26794	0.235144	0.177693	0.630311	0.297057	0.284917	0.0942656	0.420187	0.334082	0.210667	0.31619	0.286235	0.46819	0.216143	0.611336	0.335604	0.11221	0.711902	0.562598	0.484191	0.380294	0.144202	0.247723	0.108484	0.118189	0.681693	0.186103	0.142522	0.690292	0.646996	0.0489849	0.167047	0.0991159	0.15044	0.144202
cg15914863	0.684363	0.875589	0.46158	0.432831	0.811832	0.908937	0.395877	0.255159	0.861874	0.630216	0.45032	0.193912	0.448753	0.951413	0.345639	0.268881	0.643983	0.374126	0.54387	0.798117	0.494868	0.885267	0.508882	0.594023	0.280471	0.423887	0.438308	0.629652	0.740555	0.859296	0.482906	0.31264	0.890568	0.510541	0.797003	0.645457	0.659907	0.155096	0.455132	0.701681	0.353538	0.3623	0.47006	0.654846	0.594608	0.813093	0.11537	0.510756	0.855967
cg25856811	0.637865	0.382785	0.36028	0.757724	0.814678	0.17671	0.83598	0.724488	0.259281	0.57727	0.220821	0.213231	0.421721	0.647078	0.161007	0.355752	0.289446	0.495091	0.640663	0.840602	0.325896	0.770256	0.560517	0.304636	0.762096	0.691067	0.783532	0.676825	0.815445	0.165036	0.481662	0.215666	0.536	0.21124	0.408456	0.672626	0.743689	0.289633	0.523534	0.496307	0.560422	0.511722	0.669352	0.249054	0.920502	0.493945	0.273011	0.347905	0.781258
cg19718882	0.464319	0.616505	0.177503	0.0241399	0.0864373	0.595521	0.0257553	0.220006	0.076323	0.51936	0.046896	0.0569662	0.19572	0.573605	0.230578	0.0196847	0.613247	0.0503088	0.0401589	0.237889	0.0655021	0.0348966	0.088549	0.434385	0.416566	0.0456428	0.0523759	0.114316	0.180198	0.714548	0.496507	0.370127	0.323348	0.721078	0.0405091	0.0456014	0.0594272	0.0726649	0.0296631	0.489075	0.743282	0.387134	0.455542	0.0499359	0.038265	0.0747988	0.674263	0.476461	0.584121
cg04452095	0.115129	0.193277	0.283069	0.139633	0.267586	0.134491	0.632561	0.672029	0.540561	0.108002	0.123139	0.0530042	0.0864109	0.836236	0.674908	0.146217	0.09169	0.115961	0.318237	0.457052	0.167425	0.305026	0.113003	0.211125	0.390446	0.111396	0.371776	0.191295	0.152293	0.664016	0.244778	0.0934399	0.358955	0.0676489	0.444193	0.341246	0.438205	0.153071	0.258933	0.788875	0.150059	0.0631819	0.487953	0.757588	0.597906	0.0831446	0.540561	0.084824	0.259107
cg08260959	0.0829644	0.57727	0.150613	0.0625419	0.0298123	0.428142	0.0294182	0.13421	0.0330556	0.0667594	0.321908	0.0410618	0.147255	0.596702	0.474598	0.042948	0.664102	0.0625419	0.0386565	0.192848	0.0904517	0.0374076	0.0444644	0.750478	0.035949	0.153893	0.0385576	0.0591215	0.0392084	0.644887	0.382882	0.137757	0.278531	0.0367966	0.193207	0.418801	0.0432594	0.408668	0.0813182	0.835461	0.791748	0.271349	0.262281	0.0444921	0.0382598	0.0416949	0.760581	0.111288	0.611621
cg12448933	0.31452	0.0929592	0.124387	0.0202241	0.128495	0.0212465	0.0329311	0.0168736	0.0583036	0.350576	0.078524	0.249944	0.0828929	0.0134823	0.690111	0.0442791	0.106421	0.312333	0.059084	0.383919	0.180128	0.0218257	0.25831	0.171741	0.0163099	0.0257496	0.0459493	0.101066	0.0349665	0.644621	0.255427	0.233007	0.299707	0.254131	0.0337245	0.0233742	0.0515201	0.0501885	0.0586992	0.0299031	0.0769497	0.421307	0.0273627	0.0258191	0.015865	0.0203863	0.00815585	0.573913	0.0921452
cg09837648	0.726629	0.770001	0.731517	0.171954	0.447664	0.862455	0.384038	0.373825	0.639542	0.747778	0.410302	0.129554	0.229706	0.928924	0.243005	0.22188	0.752896	0.415871	0.394044	0.68814	0.312153	0.208224	0.412032	0.548612	0.656812	0.24292	0.296865	0.930674	0.54387	0.502704	0.743551	0.265218	0.842807	0.312951	0.41935	0.346868	0.617094	0.22945	0.456406	0.636449	0.917791	0.616407	0.343743	0.441341	0.260557	0.594023	0.504607	0.72633	0.520381
cg04633513	0.0212168	0.0215909	0.0252316	0.0211954	0.0203552	0.624019	0.458473	0.0492879	0.639169	0.0312539	0.0243552	0.0157218	0.0210055	0.0303864	0.0189235	0.0679391	0.0310943	0.0165747	0.0235545	0.12176	0.0333549	0.0382189	0.0265504	0.437585	0.0223097	0.0228232	0.0290224	0.0860091	0.121499	0.0155448	0.021821	0.653308	0.242072	0.0317972	0.530283	0.526799	0.64075	0.0250174	0.0112484	0.0155429	0.0175757	0.0189331	0.110774	0.764326	0.0350041	0.046634	0.0393017	0.0200567	0.0159336
cg15043057	0.182424	0.264952	0.159016	0.630878	0.0862786	0.21213	0.0704716	0.0768492	0.102848	0.0836755	0.0500635	0.121116	0.142522	0.501225	0.486386	0.0324565	0.563298	0.432923	0.0850645	0.08888	0.182906	0.169053	0.49022	0.316784	0.24317	0.249758	0.143421	0.169053	0.0973709	0.775277	0.385063	0.447664	0.637963	0.085715	0.0834679	0.126034	0.0964957	0.611906	0.05077	0.420599	0.759928	0.0750233	0.0934399	0.192475	0.0579445	0.132517	0.635619	0.107508	0.291955
cg27491887	0.363853	0.5636	0.0573089	0.49252	0.25831	0.412685	0.513331	0.502996	0.441341	0.254317	0.0697841	0.605161	0.60085	0.51282	0.635884	0.448143	0.245117	0.0131588	0.356427	0.0850132	0.40304	0.70295	0.0633106	0.466648	0.568063	0.341036	0.471811	0.0921452	0.472752	0.159257	0.240821	0.520473	0.317169	0.650782	0.438308	0.623919	0.424929	0.475928	0.0431114	0.482701	0.0446927	0.0410776	0.109669	0.158838	0.400741	0.0644718	0.0293914	0.15994	0.460523
cg06327515	0.0585841	0.592473	0.314995	0.0614308	0.0499785	0.412032	0.0961085	0.579428	0.753565	0.31452	0.704175	0.217736	0.126082	0.52841	0.689046	0.020861	0.423162	0.0453166	0.329508	0.281193	0.0624082	0.451045	0.0886259	0.487744	0.393633	0.0802668	0.511921	0.0893516	0.415871	0.368893	0.387766	0.422138	0.150844	0.0429171	0.0963138	0.0472569	0.159313	0.155343	0.302594	0.362092	0.239633	0.0644308	0.113743	0.68872	0.0386459	0.0493204	0.573913	0.237378	0.482075
cg21614638	0.486813	0.492429	0.390052	0.354069	0.172158	0.183534	0.310735	0.704666	0.134123	0.409197	0.363128	0.408778	0.576333	0.331677	0.804199	0.241993	0.272547	0.422486	0.354872	0.423567	0.622303	0.293457	0.214876	0.680157	0.738873	0.672548	0.581248	0.543773	0.595812	0.782441	0.373825	0.265305	0.342762	0.237889	0.575034	0.291201	0.347287	0.667749	0.35605	0.564227	0.36713	0.627427	0.443885	0.280013	0.722685	0.51118	0.751142	0.742304	0.682348
cg15320474	0.400638	0.823039	0.200736	0.845998	0.798502	0.567456	0.90994	0.838099	0.494766	0.511285	0.447945	0.84409	0.819814	0.860629	0.717407	0.498741	0.789574	0.855677	0.825295	0.812407	0.88093	0.712434	0.873246	0.296576	0.542653	0.797241	0.762765	0.76677	0.60219	0.270885	0.323544	0.523048	0.892284	0.624479	0.843133	0.767281	0.463822	0.465143	0.293085	0.694282	0.133317	0.89332	0.262735	0.65772	0.673517	0.727693	0.562851	0.640564	0.606608
cg23097006	0.0951588	0.199057	0.48123	0.0631677	0.0547283	0.277668	0.106492	0.043683	0.0645748	0.50713	0.280751	0.352802	0.0790988	0.10926	0.46207	0.394887	0.382379	0.0411536	0.661176	0.51012	0.134024	0.47414	0.126034	0.274135	0.360088	0.139245	0.0670838	0.0699721	0.0847279	0.527012	0.577179	0.683509	0.230236	0.46705	0.0810324	0.0585725	0.0552539	0.359362	0.0434071	0.138928	0.823096	0.427933	0.362506	0.0520442	0.291761	0.057331	0.234963	0.316875	0.501971
cg10919204	0.219678	0.679277	0.1948	0.216306	0.153179	0.244051	0.160118	0.802686	0.611808	0.518969	0.158127	0.413932	0.428038	0.598005	0.783181	0.0415052	0.401614	0.528608	0.529023	0.467682	0.331101	0.0929592	0.261572	0.312951	0.799476	0.494572	0.163358	0.434679	0.335508	0.633021	0.768861	0.0438176	0.632838	0.502405	0.689215	0.555998	0.398037	0.549513	0.28462	0.506347	0.669094	0.529131	0.411414	0.483446	0.585414	0.282704	0.664297	0.680157	0.704666
cg16762386	0.252729	0.657	0.896497	0.725058	0.867388	0.263372	0.86887	0.823659	0.863203	0.279007	0.815705	0.441341	0.306431	0.564642	0.426154	0.618614	0.83584	0.764202	0.745029	0.437207	0.584829	0.370441	0.75397	0.850593	0.359762	0.436892	0.622303	0.766708	0.784877	0.680078	0.211972	0.856678	0.758198	0.492736	0.708713	0.863203	0.86141	0.733602	0.69981	0.787025	0.692067	0.149784	0.516221	0.840649	0.441142	0.79672	0.401388	0.276017	0.641284
cg05341878	0.372819	0.361979	0.761252	0.729203	0.732177	0.236364	0.717178	0.645267	0.170937	0.509728	0.246255	0.793964	0.69925	0.730359	0.767224	0.679016	0.191581	0.407146	0.271152	0.427933	0.714691	0.108484	0.718265	0.282118	0.233671	0.703864	0.465535	0.502614	0.608079	0.674821	0.347705	0.167481	0.472441	0.191725	0.444503	0.438416	0.401614	0.798229	0.333304	0.162632	0.83025	0.581361	0.243625	0.53317	0.543355	0.250988	0.14887	0.526593	0.525171
cg12315302	0.0258815	0.0441271	0.436413	0.0883716	0.503913	0.0181693	0.0288482	0.618507	0.0262395	0.0302652	0.0373931	0.0177374	0.0179507	0.0876139	0.057609	0.0556112	0.0408588	0.0929592	0.0314785	0.0717907	0.0319763	0.0317146	0.0555586	0.0259803	0.032499	0.0263007	0.0499359	0.0181828	0.0389059	0.108276	0.0221312	0.0287092	0.0696076	0.183112	0.0274765	0.0224189	0.0193847	0.0860352	0.0683412	0.0833775	0.0643004	0.0381143	0.0370361	0.118729	0.0238468	0.153071	0.843823	0.0376324	0.0523934
cg20281815	0.852625	0.768861	0.900558	0.373508	0.297729	0.964246	0.95268	0.750895	0.48568	0.767094	0.607458	0.78378	0.85393	0.897897	0.562502	0.50703	0.892071	0.872069	0.334488	0.968349	0.797003	0.772122	0.77842	0.809836	0.456293	0.95127	0.83234	0.959986	0.491623	0.908896	0.825856	0.356427	0.875503	0.498843	0.917163	0.452754	0.484497	0.387231	0.750951	0.416093	0.415871	0.90761	0.542451	0.916899	0.674505	0.769366	0.24722	0.712284	0.842847
cg07014174	0.48481	0.429271	0.410076	0.281568	0.286531	0.220726	0.80031	0.810656	0.456722	0.843503	0.223993	0.856465	0.845379	0.114048	0.808044	0.353764	0.269417	0.492328	0.746719	0.585414	0.426574	0.106619	0.427398	0.41101	0.417994	0.771032	0.753434	0.785579	0.310638	0.880155	0.599114	0.656543	0.610371	0.238833	0.287751	0.402436	0.794482	0.692969	0.215743	0.111321	0.396713	0.78691	0.536407	0.365726	0.438615	0.371663	0.47687	0.366234	0.890688
cg13878010	0.359648	0.0743921	0.747215	0.017549	0.11304	0.0350636	0.147307	0.0530797	0.366136	0.0576752	0.0359991	0.562598	0.0447893	0.463911	0.80632	0.0656427	0.0262889	0.632097	0.261666	0.0532627	0.0621744	0.276559	0.0397153	0.328102	0.0382235	0.0744799	0.0197908	0.086635	0.3618	0.141757	0.097693	0.0313326	0.0388367	0.0239944	0.345342	0.0383638	0.0457273	0.441657	0.109861	0.767542	0.0357721	0.105363	0.5697	0.0338152	0.0378871	0.0367966	0.0520184	0.0750428	0.703703
cg15512851	0.51012	0.67876	0.210288	0.180926	0.10838	0.42534	0.163899	0.36078	0.253604	0.331	0.285785	0.137912	0.331952	0.742176	0.141484	0.0566654	0.152006	0.385795	0.252729	0.79856	0.281113	0.400741	0.167172	0.329308	0.446422	0.573818	0.439547	0.52078	0.635333	0.906794	0.36713	0.183606	0.250306	0.276467	0.177693	0.208465	0.240558	0.455647	0.166947	0.490112	0.85332	0.507457	0.23927	0.174024	0.342762	0.421519	0.859131	0.508475	0.849673
cg03417466	0.836914	0.787091	0.67335	0.594122	0.240116	0.426793	0.914852	0.751007	0.385688	0.822288	0.61939	0.819553	0.758941	0.586798	0.307292	0.449669	0.220333	0.67335	0.62184	0.778785	0.700471	0.145951	0.81655	0.778481	0.229617	0.850856	0.379535	0.738515	0.720407	0.765978	0.685823	0.52139	0.773004	0.489716	0.485131	0.533475	0.450937	0.417994	0.375748	0.481008	0.494658	0.575925	0.25803	0.413832	0.754518	0.343645	0.579326	0.520689	0.778189
cg06516124	0.777194	0.196617	0.539265	0.0827045	0.0872585	0.561376	0.0594962	0.535168	0.0811234	0.527509	0.182494	0.109933	0.262281	0.113234	0.708092	0.0405435	0.601335	0.127992	0.167116	0.446943	0.173886	0.0889307	0.207916	0.734822	0.886697	0.358652	0.403144	0.149033	0.156119	0.866734	0.757049	0.4542	0.156352	0.686914	0.154675	0.171954	0.0644004	0.664384	0.0610008	0.486813	0.350868	0.541206	0.28682	0.111618	0.222734	0.13157	0.679187	0.630878	0.752626
cg20973210	0.284353	0.207669	0.519766	0.171287	0.651049	0.60914	0.349271	0.250208	0.653308	0.470684	0.0802668	0.142111	0.221787	0.551016	0.26467	0.149382	0.0545185	0.545563	0.166277	0.29167	0.127438	0.640471	0.137505	0.223576	0.495538	0.326591	0.228183	0.24029	0.158431	0.391775	0.161901	0.479542	0.110704	0.136543	0.28633	0.634778	0.314422	0.747856	0.0456014	0.192174	0.0928237	0.620536	0.107095	0.09749	0.522151	0.00179898	0.470684	0.674741	0.706506
cg10398682	0.142168	0.138075	0.604867	0.39426	0.110003	0.680675	0.5273	0.276559	0.160714	0.18915	0.265123	0.417083	0.138575	0.504108	0.719027	0.191077	0.777317	0.067361	0.0813182	0.554788	0.255517	0.530915	0.16641	0.117069	0.115251	0.150171	0.326413	0.109791	0.145292	0.537334	0.264302	0.577367	0.0939855	0.0917206	0.534152	0.582625	0.176985	0.125136	0.0597294	0.114124	0.793339	0.602014	0.0961984	0.520077	0.336438	0.0778421	0.109411	0.561264	0.106287
cg22809047	0.453895	0.533677	0.179787	0.351933	0.192475	0.130875	0.475728	0.10269	0.215666	0.246169	0.1952	0.780157	0.44175	0.10132	0.739788	0.0277499	0.826764	0.488587	0.104345	0.149611	0.702528	0.0870562	0.22945	0.168671	0.10563	0.380085	0.156842	0.43137	0.127253	0.759405	0.152465	0.355657	0.657181	0.488768	0.130781	0.201243	0.551226	0.925914	0.128909	0.123904	0.595812	0.284076	0.139443	0.394473	0.10699	0.170807	0.256835	0.111253	0.124787
cg10784030	0.0738673	0.047909	0.357008	0.18388	0.730278	0.0463637	0.0907487	0.12279	0.083101	0.0394633	0.0828226	0.0721324	0.0821762	0.0576967	0.796199	0.0675881	0.154927	0.137505	0.35764	0.077864	0.0862336	0.341036	0.0777785	0.0593439	0.442302	0.125763	0.256909	0.0880973	0.750478	0.591799	0.0707984	0.083101	0.0480308	0.089564	0.0773418	0.0892219	0.137036	0.109151	0.122876	0.79306	0.785051	0.0806495	0.261572	0.871231	0.159687	0.131152	0.744329	0.449466	0.66305
cg09494546	0.28954	0.381965	0.749884	0.264486	0.803182	0.189015	0.810656	0.530074	0.421615	0.531987	0.237804	0.300067	0.578445	0.100363	0.053557	0.393027	0.266444	0.653308	0.568467	0.15073	0.223838	0.264036	0.219678	0.746509	0.736489	0.265123	0.455868	0.447945	0.668112	0.126034	0.42545	0.310837	0.752689	0.284723	0.671672	0.693288	0.524847	0.152006	0.619288	0.656721	0.215601	0.0850391	0.278615	0.330402	0.519162	0.643895	0.109225	0.573818	0.131105
cg06295856	0.24781	0.100122	0.727766	0.0135985	0.042846	0.0349397	0.654929	0.0211525	0.0855078	0.0710823	0.304737	0.123139	0.0606361	0.0174728	0.374615	0.01844	0.0555489	0.0209111	0.135403	0.330402	0.1478	0.195885	0.476143	0.380908	0.0178683	0.0350092	0.574628	0.0739046	0.0277911	0.435585	0.0373931	0.194272	0.0505609	0.058037	0.476038	0.0403782	0.0431818	0.0689571	0.0285289	0.747581	0.284166	0.139789	0.0240883	0.056548	0.1343	0.220982	0.821378	0.275928	0.0325755
cg26309134	0.3358	0.0125781	0.0132433	0.0397373	0.0200236	0.0121912	0.0526562	0.0325439	0.0303085	0.0289408	0.0192735	0.0170144	0.137402	0.0131937	0.921504	0.034663	0.0273536	0.590298	0.0326776	0.456067	0.0142757	0.0255692	0.0130001	0.0154918	0.0173961	0.0202147	0.0443583	0.0321976	0.027449	0.0182273	0.109933	0.0424766	0.0149399	0.0207085	0.031952	0.00658197	0.0239526	0.020598	0.182424	0.0197012	0.69925	0.768928	0.026418	0.0201886	0.0252173	0.0346787	0.0235442	0.00905801	0.0234882
cg11611600	0.164777	0.0876139	0.0311424	0.0377817	0.0696166	0.5904	0.0391589	0.0446142	0.178511	0.0758766	0.0825791	0.594608	0.0515292	0.2438	0.43579	0.0708973	0.707859	0.6506	0.0426562	0.047472	0.019561	0.123186	0.22616	0.0820823	0.0239372	0.05416	0.0474192	0.0495466	0.0284291	0.0348556	0.278051	0.0392084	0.25396	0.41935	0.0382861	0.0240773	0.0418204	0.577179	0.0400449	0.0335625	0.56189	0.599956	0.134783	0.0865384	0.0252487	0.0712351	0.051106	0.253433	0.0827506
cg08047907	0.0224702	0.605161	0.60095	0.372718	0.0260358	0.654122	0.348848	0.0178964	0.243625	0.0517332	0.0375883	0.0626538	0.06667	0.669534	0.0185102	0.0142224	0.603492	0.0188584	0.0694226	0.168671	0.060988	0.0227841	0.0679079	0.586888	0.254675	0.0320644	0.141328	0.0462109	0.109669	0.224485	0.321908	0.0484782	0.388985	0.625892	0.0272338	0.0431692	0.0442324	0.0207905	0.0194964	0.381633	0.565744	0.240735	0.179928	0.357325	0.37606	0.154388	0.0197055	0.311279	0.337728
cg25692621	0.256214	0.27201	0.675423	0.697849	0.717178	0.473595	0.687886	0.62298	0.374324	0.747444	0.797672	0.35845	0.657905	0.661973	0.507863	0.802092	0.177372	0.53907	0.670394	0.605252	0.66305	0.50481	0.844047	0.782082	0.63571	0.573605	0.53691	0.278142	0.755218	0.26202	0.402325	0.644987	0.339317	0.113481	0.760001	0.745834	0.67021	0.28329	0.765905	0.467585	0.531987	0.68494	0.785228	0.691571	0.492215	0.723035	0.423567	0.384347	0.54226
cg24019564	0.229791	0.589501	0.739788	0.674821	0.497711	0.696864	0.496794	0.864042	0.354366	0.114672	0.49022	0.223244	0.0679552	0.631732	0.683853	0.73232	0.696951	0.321315	0.353538	0.36671	0.562796	0.708634	0.795289	0.0919651	0.582357	0.0911254	0.674578	0.269318	0.324939	0.547897	0.14076	0.915422	0.747929	0.674662	0.19972	0.801201	0.259107	0.436223	0.923221	0.885886	0.600646	0.0478217	0.366327	0.201456	0.204154	0.345544	0.720179	0.391775	0.445989
cg23338195	0.707859	0.392516	0.443566	0.468925	0.797835	0.284439	0.866987	0.748917	0.256038	0.709207	0.341724	0.812783	0.624479	0.697187	0.16805	0.833407	0.201243	0.276017	0.698386	0.616602	0.603227	0.109189	0.594418	0.450121	0.167668	0.719726	0.519162	0.65709	0.795475	0.271152	0.460523	0.343841	0.476461	0.305132	0.583347	0.678926	0.48918	0.274805	0.582528	0.454616	0.745172	0.808098	0.665083	0.588927	0.747856	0.669626	0.552834	0.395374	0.601228
cg06781209	0.0762431	0.0746105	0.539848	0.208465	0.179117	0.0307705	0.435186	0.149837	0.154332	0.127818	0.074263	0.390644	0.181551	0.41432	0.41452	0.140052	0.0896716	0.0537931	0.208372	0.157448	0.263022	0.52078	0.210288	0.59931	0.144267	0.0543254	0.0633237	0.0647475	0.534152	0.0300378	0.538768	0.624964	0.031639	0.0688484	0.137757	0.437684	0.0908301	0.196328	0.0496428	0.846493	0.561376	0.459297	0.0601318	0.231929	0.280471	0.0336046	0.09749	0.238138	0.0251355
cg05155595	0.206481	0.298881	0.782932	0.438416	0.78414	0.122229	0.567142	0.739584	0.284827	0.230578	0.668473	0.243885	0.249859	0.0842307	0.641633	0.75377	0.190844	0.623353	0.690643	0.189439	0.232758	0.651049	0.301319	0.634876	0.601047	0.296372	0.494658	0.617925	0.701033	0.427822	0.17042	0.340515	0.29459	0.298207	0.696449	0.609322	0.719726	0.274408	0.538568	0.613336	0.437097	0.146106	0.427933	0.325512	0.365421	0.67326	0.148362	0.184018	0.356427
cg11884243	0.8585	0.581248	0.697366	0.737499	0.586198	0.527198	0.89961	0.519766	0.941368	0.841531	0.483863	0.952399	0.949459	0.187096	0.206715	0.55044	0.323234	0.893105	0.8618	0.864083	0.8722	0.925824	0.872606	0.596502	0.915561	0.94785	0.935252	0.894368	0.371887	0.594215	0.690914	0.926121	0.690552	0.353434	0.866393	0.937692	0.913293	0.948043	0.645361	0.79121	0.345342	0.765026	0.869032	0.90658	0.902147	0.913564	0.923731	0.628081	0.935309
cg01335367	0.176517	0.650223	0.827468	0.766567	0.758861	0.668112	0.767945	0.608461	0.710286	0.317756	0.633853	0.537424	0.203593	0.90172	0.806588	0.721302	0.163244	0.75684	0.719804	0.473057	0.408994	0.802843	0.559406	0.573712	0.571248	0.274896	0.588828	0.107829	0.375659	0.702449	0.560422	0.889737	0.387659	0.505524	0.825085	0.865804	0.657181	0.48061	0.895224	0.704666	0.113604	0.402526	0.773771	0.727766	0.658811	0.665711	0.779487	0.562598	0.433845
cg14011639	0.0772832	0.0622657	0.409968	0.112287	0.0381395	0.0792346	0.189079	0.673786	0.0236915	0.118353	0.0368021	0.136642	0.058037	0.238649	0.374426	0.0891164	0.529853	0.0205491	0.0265979	0.109557	0.10724	0.578544	0.109083	0.298972	0.406126	0.0310649	0.626153	0.084657	0.128084	0.113584	0.326689	0.061505	0.27665	0.0672819	0.0262075	0.0339018	0.0361435	0.24292	0.0214856	0.182906	0.649423	0.334273	0.322754	0.0899454	0.0262919	0.0268195	0.689853	0.355262	0.15335
cg26609631	0.154443	0.404379	0.597536	0.0337986	0.224992	0.0273254	0.096677	0.222138	0.102471	0.291201	0.0617721	0.60895	0.303183	0.033742	0.524534	0.0401696	0.680416	0.700058	0.0606246	0.560023	0.120994	0.0304924	0.224404	0.107095	0.0833995	0.0428023	0.142972	0.108447	0.181346	0.679638	0.0409045	0.0199013	0.479863	0.752896	0.0446658	0.0189382	0.207998	0.0193408	0.134976	0.0280711	0.75022	0.490503	0.0892483	0.0301537	0.0178964	0.0832871	0.0146481	0.09169	0.0716888
cg26093687	0.841212	0.40489	0.512122	0.280661	0.571636	0.824902	0.380908	0.258406	0.733361	0.862902	0.316784	0.305026	0.40662	0.387036	0.864857	0.109048	0.698074	0.453795	0.530614	0.837484	0.346868	0.424929	0.348947	0.422486	0.674065	0.640923	0.421615	0.823137	0.43632	0.829551	0.829913	0.220407	0.739516	0.274408	0.27201	0.427398	0.637772	0.318957	0.360088	0.449565	0.841659	0.856678	0.247723	0.433734	0.570938	0.814929	0.726405	0.79856	0.701603
cg07654896	0.628831	0.54982	0.4209	0.61822	0.85613	0.776671	0.333212	0.31885	0.653576	0.423162	0.602366	0.508173	0.440097	0.878353	0.502516	0.67212	0.930276	0.387036	0.756976	0.755796	0.531766	0.903776	0.654929	0.622218	0.238052	0.483232	0.333017	0.480087	0.641543	0.568266	0.614783	0.428762	0.833745	0.834381	0.761112	0.399168	0.536407	0.900558	0.3867	0.851337	0.863705	0.312153	0.588437	0.936338	0.34003	0.482496	0.116901	0.353648	0.440593
cg17641252	0.419885	0.319735	0.640202	0.665174	0.567574	0.693127	0.805993	0.320913	0.513533	0.299973	0.386592	0.876144	0.506244	0.635062	0.882273	0.17932	0.822083	0.741133	0.594122	0.46705	0.510541	0.743838	0.747072	0.423464	0.297729	0.562298	0.566146	0.521944	0.654033	0.612955	0.350471	0.880802	0.599492	0.467682	0.633668	0.280098	0.669626	0.521606	0.345342	0.298016	0.214724	0.24292	0.273498	0.350675	0.353764	0.605617	0.819864	0.268132	0.387659
cg00842351	0.455334	0.526308	0.559313	0.252383	0.0578547	0.674578	0.0435411	0.482701	0.0831238	0.101128	0.403239	0.126381	0.0693928	0.854234	0.487527	0.3309	0.606198	0.219601	0.148691	0.271262	0.108846	0.411721	0.133134	0.514982	0.595712	0.0758207	0.23746	0.0354946	0.388158	0.268314	0.520473	0.39908	0.303868	0.826405	0.160289	0.333413	0.158724	0.426678	0.253784	0.862085	0.816401	0.143076	0.575429	0.158779	0.503415	0.148244	0.703536	0.533574	0.333212
cg06277657	0.163293	0.489075	0.74149	0.57727	0.726629	0.488073	0.670814	0.690292	0.673786	0.0622242	0.835891	0.707709	0.182157	0.745705	0.71694	0.707231	0.69752	0.26202	0.719245	0.344509	0.316283	0.755921	0.566848	0.771993	0.495432	0.228656	0.270801	0.145534	0.482795	0.788286	0.34394	0.864934	0.536517	0.818797	0.673786	0.424198	0.428969	0.622773	0.691152	0.819503	0.829361	0.561676	0.665961	0.69949	0.29167	0.537827	0.80498	0.659724	0.619692
cg19664945	0.612012	0.674183	0.814367	0.266444	0.418595	0.73866	0.442811	0.765219	0.582721	0.26421	0.471211	0.116405	0.223159	0.668206	0.680242	0.173354	0.811938	0.273282	0.359648	0.562598	0.25533	0.448048	0.343063	0.807085	0.0938742	0.225755	0.500184	0.429183	0.471489	0.661089	0.397182	0.27928	0.764661	0.539449	0.321908	0.584121	0.515804	0.24125	0.397813	0.804297	0.819978	0.339722	0.494166	0.775776	0.283245	0.634313	0.548308	0.639169	0.619876
cg05040360	0.897438	0.851505	0.29281	0.443349	0.490804	0.805993	0.756508	0.634489	0.516221	0.871733	0.328102	0.543173	0.46158	0.3831	0.107829	0.457245	0.216695	0.304112	0.846405	0.803422	0.500486	0.173631	0.624389	0.501339	0.552633	0.712362	0.648548	0.624479	0.448048	0.642155	0.920213	0.333785	0.850513	0.644155	0.564642	0.292902	0.578145	0.678842	0.449316	0.368376	0.358557	0.886128	0.612483	0.503104	0.602276	0.337428	0.141643	0.887624	0.874144
cg14851685	0.563807	0.365515	0.386592	0.709207	0.411414	0.827661	0.838385	0.343165	0.618974	0.30189	0.335314	0.849172	0.620635	0.293173	0.115807	0.12279	0.444394	0.648904	0.353648	0.523148	0.439547	0.251499	0.467152	0.424602	0.24125	0.189945	0.405808	0.756646	0.222138	0.491623	0.48568	0.335416	0.747146	0.593636	0.434385	0.338231	0.610188	0.405396	0.187609	0.277038	0.274408	0.641811	0.156775	0.405396	0.223838	0.558574	0.0851151	0.326006	0.200414
cg18555440	0.247299	0.56189	0.674741	0.0250851	0.144578	0.482608	0.296372	0.107129	0.599772	0.460422	0.737169	0.617726	0.232418	0.448143	0.634583	0.61822	0.644801	0.723415	0.0847007	0.348522	0.161484	0.531438	0.12734	0.591894	0.183606	0.104022	0.246169	0.180717	0.609511	0.676566	0.419551	0.499481	0.492837	0.70531	0.511722	0.265396	0.337931	0.156299	0.0451523	0.699972	0.7868	0.42596	0.542768	0.266444	0.0543146	0.52363	0.0591337	0.516644	0.563494
cg09009380	0.162513	0.545669	0.858124	0.438822	0.2112	0.797563	0.648548	0.85223	0.406418	0.216306	0.644155	0.769489	0.107682	0.852968	0.802735	0.39104	0.849172	0.0426248	0.33913	0.573409	0.215128	0.897396	0.524023	0.572008	0.551336	0.223576	0.843641	0.257271	0.833556	0.893006	0.257515	0.896696	0.323234	0.882347	0.828865	0.790479	0.465143	0.884937	0.372099	0.871398	0.55848	0.0818824	0.573106	0.665346	0.702868	0.598815	0.913104	0.494166	0.558186
cg00333226	0.52474	0.560517	0.0440864	0.0688484	0.101037	0.466245	0.0624892	0.19298	0.131244	0.274408	0.216695	0.0684933	0.133796	0.526207	0.60789	0.0650224	0.60961	0.190289	0.0858583	0.42545	0.0755137	0.0728661	0.0953775	0.112248	0.0656602	0.102277	0.0558721	0.134783	0.0950742	0.536102	0.51446	0.0644445	0.398481	0.719872	0.0772262	0.0802441	0.124221	0.121285	0.0756626	0.0730548	0.766181	0.357325	0.383825	0.104022	0.054759	0.0383274	0.0556957	0.675164	0.51446
cg18350391	0.175291	0.357424	0.301121	0.351257	0.759344	0.254574	0.593318	0.548906	0.799418	0.277227	0.239633	0.256909	0.218323	0.644347	0.869238	0.623445	0.263941	0.154017	0.389958	0.361685	0.552327	0.793739	0.355368	0.59471	0.809836	0.213151	0.820678	0.273938	0.722548	0.804297	0.186516	0.608848	0.845422	0.0488458	0.506436	0.649073	0.335223	0.655479	0.496204	0.505829	0.60095	0.362599	0.433128	0.64664	0.800204	0.735096	0.81675	0.271919	0.626261
cg16175725	0.660363	0.567961	0.961508	0.950601	0.945316	0.267154	0.935719	0.95707	0.92209	0.504607	0.939498	0.966646	0.94414	0.132107	0.794245	0.788933	0.42471	0.967955	0.95329	0.676285	0.940545	0.963936	0.95892	0.875503	0.955922	0.952828	0.960067	0.930873	0.972752	0.864642	0.456617	0.957928	0.667925	0.129329	0.885021	0.947475	0.969784	0.96214	0.945512	0.918913	0.890646	0.666829	0.850421	0.954677	0.870907	0.90611	0.783293	0.321315	0.866015
cg04448487	0.396713	0.16535	0.388781	0.0507782	0.0788862	0.652769	0.105425	0.166156	0.126427	0.299348	0.65051	0.1533	0.133639	0.151509	0.561376	0.0627615	0.691987	0.0459222	0.510433	0.192698	0.118023	0.228183	0.0881978	0.107756	0.0517141	0.061266	0.0746105	0.121202	0.0708795	0.0883149	0.0998543	0.0705236	0.310447	0.337824	0.101098	0.170868	0.0697142	0.0687006	0.0670838	0.592569	0.842446	0.638591	0.0780498	0.0708311	0.0612395	0.0489112	0.0560705	0.299348	0.626447
cg13301003	0.622406	0.539848	0.763469	0.166156	0.184974	0.754798	0.207347	0.588331	0.193207	0.752948	0.492112	0.190004	0.335223	0.767878	0.436511	0.150389	0.799919	0.362703	0.237632	0.588247	0.274221	0.174964	0.250561	0.830439	0.850513	0.399376	0.544467	0.417083	0.254675	0.833556	0.82437	0.542451	0.533277	0.841118	0.26698	0.307013	0.283165	0.604952	0.193564	0.70295	0.871398	0.53124	0.36524	0.344229	0.265643	0.357008	0.755864	0.733689	0.80525
cg12953249	0.843771	0.956925	0.869316	0.345138	0.46819	0.953664	0.767878	0.345447	0.442911	0.955278	0.576424	0.216614	0.386484	0.239794	0.922885	0.780224	0.93218	0.556588	0.771032	0.954825	0.432234	0.898757	0.345238	0.398148	0.815705	0.67551	0.498843	0.793179	0.82442	0.955192	0.944075	0.285679	0.968066	0.943325	0.439338	0.391673	0.491913	0.761112	0.597636	0.910206	0.939032	0.933361	0.657272	0.545465	0.68394	0.76202	0.501446	0.922419	0.97188
cg13234863	0.190844	0.403239	0.284257	0.411114	0.119788	0.344325	0.354572	0.41452	0.123051	0.125136	0.575137	0.57553	0.143725	0.49252	0.378889	0.651138	0.517067	0.616407	0.520281	0.210667	0.158054	0.734822	0.362808	0.154799	0.0727346	0.0961372	0.467152	0.118104	0.638883	0.699656	0.302191	0.488862	0.240908	0.512227	0.3867	0.660546	0.0997588	0.361685	0.67021	0.124472	0.836868	0.309866	0.388571	0.218807	0.0896716	0.0998254	0.204154	0.39055	0.600737
cg02498063	0.596784	0.680242	0.309588	0.82705	0.638229	0.180996	0.0892219	0.474382	0.191001	0.239633	0.700552	0.866139	0.400638	0.819364	0.704666	0.387553	0.73225	0.711054	0.161422	0.619594	0.312531	0.508173	0.729421	0.492215	0.450734	0.353019	0.465648	0.260946	0.177693	0.874936	0.291296	0.346552	0.679638	0.118124	0.265562	0.407936	0.251414	0.329602	0.158054	0.227002	0.230578	0.359257	0.478751	0.442601	0.562598	0.164777	0.720857	0.472021	0.821027
cg08383315	0.034349	0.636832	0.0103679	0.0247737	0.0212465	0.541628	0.024507	0.0966131	0.0282878	0.0321324	0.0244914	0.0193252	0.136496	0.383217	0.0346742	0.0216307	0.673702	0.0120976	0.356524	0.281113	0.0377711	0.0223353	0.081594	0.0810135	0.0184555	0.0171559	0.0210439	0.0462396	0.0230425	0.659907	0.131909	0.032473	0.391875	0.632097	0.0514314	0.0144201	0.0288547	0.0109361	0.0192191	0.0259181	0.540877	0.0164426	0.263754	0.0157669	0.028832	0.0200398	0.0216632	0.122617	0.64664
cg26390526	0.882465	0.430408	0.90939	0.900682	0.911112	0.154204	0.686333	0.853759	0.75671	0.846041	0.357008	0.926785	0.931771	0.901603	0.114316	0.904557	0.633945	0.750082	0.943518	0.896292	0.909479	0.098748	0.912406	0.301615	0.807513	0.897979	0.900891	0.826163	0.489597	0.876102	0.87148	0.860214	0.566146	0.321217	0.374615	0.806917	0.918143	0.898143	0.934465	0.591611	0.192475	0.944501	0.826561	0.653576	0.947277	0.394044	0.560319	0.420791	0.387957
cg13081704	0.755474	0.732838	0.404169	0.139495	0.26467	0.843273	0.388465	0.418687	0.293085	0.744742	0.455542	0.533772	0.392718	0.90369	0.916155	0.0906156	0.60533	0.0909402	0.236364	0.735096	0.500684	0.896582	0.630976	0.481857	0.769303	0.557117	0.739921	0.549209	0.249674	0.597056	0.715438	0.75377	0.46167	0.470684	0.375845	0.318237	0.306821	0.378295	0.373218	0.594507	0.146385	0.75417	0.329308	0.753913	0.761886	0.450734	0.142704	0.778661	0.89332
cg25044651	0.332721	0.542768	0.6715	0.0609758	0.283533	0.631821	0.223747	0.189015	0.368467	0.581459	0.162195	0.604097	0.457756	0.714548	0.651513	0.110523	0.749261	0.651762	0.668112	0.508475	0.486094	0.208465	0.277038	0.751142	0.0528066	0.198099	0.182767	0.548612	0.691067	0.629474	0.580739	0.297925	0.544795	0.385481	0.256741	0.553449	0.571348	0.414837	0.179189	0.66829	0.818308	0.491113	0.609038	0.167234	0.0448658	0.272732	0.725058	0.259107	0.639824
cg25298754	0.712284	0.30199	0.335703	0.0608872	0.143725	0.385176	0.156234	0.214616	0.0878661	0.720332	0.179928	0.152732	0.387231	0.095254	0.0948526	0.10015	0.170807	0.294884	0.277498	0.520281	0.245729	0.128039	0.124387	0.412778	0.221956	0.612578	0.174755	0.572708	0.347802	0.462168	0.43852	0.108775	0.265562	0.451449	0.171068	0.151722	0.223576	0.0841823	0.177372	0.419237	0.372198	0.783593	0.153462	0.183751	0.262832	0.263479	0.890727	0.849036	0.341246
cg08089301	0.704499	0.157281	0.0279418	0.00678476	0.0234087	0.0568008	0.0148883	0.0140227	0.0151876	0.0397582	0.0333586	0.0250259	0.0407472	0.0339913	0.0154605	0.0278317	0.776945	0.0129427	0.0212839	0.033418	0.0191585	0.0253782	0.0209666	0.0241869	0.198696	0.0230139	0.0153491	0.0171246	0.0192477	0.0197662	0.0295239	0.0124731	0.0292999	0.0233486	0.0478589	0.0166413	0.0142944	0.0161679	0.0193711	0.0371692	0.0160753	0.797003	0.0419695	0.0202788	0.0343751	0.0157106	0.026699	0.027012	0.0238104
cg01693350	0.594122	0.747929	0.777876	0.209805	0.416093	0.759665	0.230489	0.708796	0.424198	0.294983	0.414948	0.141699	0.468492	0.810547	0.71067	0.310265	0.862989	0.330511	0.387659	0.651138	0.248682	0.226669	0.456617	0.838148	0.931771	0.178583	0.593727	0.604681	0.69231	0.838653	0.651227	0.68136	0.701915	0.879067	0.274315	0.320409	0.417905	0.356613	0.175153	0.806265	0.818849	0.710598	0.637487	0.282118	0.216775	0.551016	0.829958	0.565459	0.771929
cg26259363	0.48764	0.813145	0.671581	0.582264	0.576536	0.834665	0.363335	0.430408	0.675164	0.393128	0.227561	0.115289	0.264401	0.885803	0.837387	0.127865	0.569029	0.281294	0.244298	0.803586	0.583444	0.63164	0.506244	0.318351	0.674505	0.363746	0.351832	0.873853	0.694785	0.701283	0.71432	0.230974	0.896455	0.717799	0.412246	0.366611	0.349671	0.804474	0.279965	0.683023	0.867029	0.763143	0.35605	0.350168	0.451852	0.51097	0.818351	0.739652	0.666403
cg17142183	0.656629	0.336543	0.717103	0.880233	0.813964	0.578727	0.869072	0.886858	0.766181	0.399811	0.875705	0.659254	0.894287	0.529448	0.16572	0.581652	0.537929	0.713302	0.868782	0.711824	0.705148	0.927507	0.45032	0.832103	0.605986	0.782871	0.847057	0.489821	0.867507	0.932381	0.434474	0.573504	0.357424	0.410692	0.801808	0.899364	0.785403	0.136593	0.580739	0.798382	0.959733	0.555615	0.537334	0.519878	0.8661	0.871076	0.46167	0.885886	0.345342
cg25462291	0.034495	0.0496428	0.797195	0.0416277	0.0276332	0.0149241	0.031864	0.0102759	0.0100627	0.612391	0.0265655	0.747215	0.0933896	0.0206048	0.53124	0.0371387	0.0580611	0.0573952	0.0413475	0.071353	0.0771452	0.0317021	0.016454	0.0324486	0.0145534	0.211972	0.0599739	0.0336124	0.0313631	0.547202	0.0361809	0.0611508	0.0211931	0.034349	0.0700444	0.0165747	0.0378822	0.120238	0.0342028	0.0167386	0.672454	0.0544404	0.0400226	0.381308	0.0630724	0.0576752	0.0210007	0.163712	0.393933
cg23178308	0.145077	0.656001	0.570938	0.0694226	0.0938441	0.578045	0.0346906	0.512024	0.0628572	0.0852175	0.207428	0.0612007	0.158724	0.771793	0.617186	0.0352012	0.718644	0.0207616	0.0264533	0.519468	0.0722745	0.0736852	0.0545886	0.222478	0.776808	0.0355273	0.478848	0.312531	0.308622	0.717103	0.140911	0.146444	0.555815	0.412141	0.0670838	0.178186	0.0917206	0.261041	0.0641867	0.439243	0.811885	0.0929044	0.492931	0.446631	0.129464	0.0542626	0.775277	0.159625	0.515702
cg04490714	0.180926	0.0306282	0.673166	0.0200541	0.246791	0.527901	0.0745524	0.0477364	0.126696	0.152465	0.0422703	0.470891	0.310447	0.0715083	0.0266547	0.0282569	0.231696	0.0273793	0.471397	0.54508	0.130256	0.391975	0.178186	0.0801517	0.0174352	0.0230673	0.0545369	0.127024	0.12979	0.029202	0.485355	0.108276	0.538468	0.450415	0.130649	0.194272	0.151241	0.0400397	0.0531375	0.828391	0.0662674	0.537424	0.0354319	0.0293882	0.444918	0.0431818	0.116252	0.236364	0.588528
cg03969797	0.457337	0.395004	0.117029	0.359762	0.29468	0.23897	0.373926	0.714251	0.192543	0.428443	0.354777	0.613336	0.361685	0.581248	0.0999587	0.817949	0.506436	0.780759	0.5559	0.666043	0.504395	0.25478	0.356613	0.228812	0.647078	0.49521	0.274135	0.651138	0.310837	0.562598	0.222478	0.428245	0.801749	0.417814	0.671329	0.194649	0.552437	0.492328	0.707468	0.601135	0.152293	0.650966	0.614973	0.120487	0.687641	0.287846	0.132386	0.297543	0.688557
cg22828602	0.839405	0.749464	0.390855	0.621932	0.740127	0.765978	0.857313	0.449565	0.788395	0.826809	0.168542	0.846363	0.87575	0.774723	0.817489	0.706036	0.752198	0.287622	0.853151	0.605161	0.595221	0.0766335	0.455542	0.245639	0.31581	0.866647	0.101066	0.67021	0.267806	0.759796	0.845553	0.690454	0.753434	0.839633	0.569651	0.623724	0.621932	0.597809	0.604395	0.68477	0.841982	0.903521	0.651049	0.466551	0.813911	0.371887	0.514568	0.831105	0.747033
cg11644586	0.140152	0.589312	0.599682	0.473595	0.708092	0.111109	0.741198	0.628252	0.356918	0.342583	0.641097	0.61939	0.319826	0.523922	0.415871	0.804474	0.75671	0.708331	0.587565	0.410692	0.36671	0.68814	0.55407	0.754448	0.0983584	0.300456	0.707231	0.309866	0.79133	0.714834	0.261041	0.776221	0.465648	0.31264	0.532836	0.785108	0.680583	0.824474	0.578255	0.771993	0.179587	0.0873904	0.347177	0.717724	0.589616	0.400319	0.75853	0.417414	0.364476
cg08268099	0.913728	0.456508	0.750478	0.95818	0.527198	0.600157	0.86999	0.352318	0.856172	0.832193	0.481008	0.889156	0.839364	0.25629	0.23184	0.271537	0.224992	0.479437	0.857896	0.77603	0.813145	0.307776	0.906621	0.568467	0.407834	0.76202	0.773137	0.857813	0.438205	0.526897	0.817949	0.768573	0.55407	0.496003	0.733842	0.547008	0.668473	0.922935	0.664297	0.245895	0.340515	0.898837	0.79215	0.702038	0.584829	0.704022	0.327297	0.619594	0.57727
cg21458907	0.0702914	0.317077	0.0746793	0.0169407	0.298016	0.502996	0.478317	0.0826648	0.364812	0.256567	0.0628166	0.434879	0.089143	0.515305	0.00870856	0.18078	0.643446	0.355462	0.603136	0.321416	0.110738	0.549104	0.266088	0.327007	0.311386	0.0164123	0.0409609	0.100487	0.547897	0.706282	0.0313592	0.438714	0.62798	0.809314	0.114273	0.0809514	0.141951	0.21059	0.622584	0.0432966	0.379222	0.0276883	0.480295	0.0886787	0.0301394	0.132469	0.0252261	0.121453	0.593318
cg25655096	0.429363	0.309486	0.144202	0.142972	0.785764	0.147523	0.478948	0.536707	0.127438	0.457654	0.168233	0.149203	0.395764	0.0769685	0.546811	0.329017	0.157448	0.357424	0.479972	0.561676	0.239013	0.483863	0.0921193	0.179858	0.209259	0.567769	0.624575	0.256909	0.62298	0.569603	0.27228	0.139735	0.397813	0.12176	0.770329	0.760513	0.359257	0.0921452	0.214188	0.214188	0.646297	0.313842	0.100973	0.334168	0.455038	0.624575	0.469344	0.181421	0.852921
cg05072008	0.335904	0.692727	0.682931	0.591504	0.39426	0.708018	0.521177	0.24029	0.216614	0.449363	0.720931	0.395186	0.417414	0.361884	0.80042	0.153071	0.659907	0.759796	0.436102	0.571537	0.203947	0.841303	0.738237	0.290801	0.12758	0.482906	0.418099	0.53305	0.344033	0.837668	0.7126	0.889083	0.632361	0.524636	0.566146	0.785523	0.259831	0.582924	0.59725	0.600737	0.885142	0.267586	0.643183	0.524334	0.360691	0.366611	0.197871	0.759281	0.656086
cg15928398	0.473916	0.52363	0.63164	0.603227	0.377874	0.272099	0.192026	0.208224	0.463911	0.376574	0.755987	0.549209	0.460834	0.498249	0.63832	0.406418	0.467971	0.712847	0.191295	0.0685401	0.438091	0.519666	0.487331	0.137807	0.481857	0.301421	0.53051	0.180853	0.416363	0.681442	0.347287	0.434172	0.161541	0.749137	0.491317	0.624112	0.397398	0.345038	0.196252	0.676199	0.688635	0.292536	0.38528	0.185174	0.10926	0.0650789	0.628634	0.157743	0.255243
cg23710218	0.249758	0.591395	0.610852	0.533677	0.47058	0.630878	0.525477	0.15044	0.614783	0.436892	0.629839	0.411114	0.308527	0.140709	0.727396	0.469546	0.686914	0.498354	0.234705	0.455132	0.331	0.261758	0.332155	0.67212	0.101128	0.353326	0.262472	0.207428	0.573308	0.485013	0.568266	0.646192	0.547603	0.772765	0.295081	0.239716	0.189945	0.606975	0.702373	0.691827	0.536804	0.114316	0.706664	0.146325	0.617823	0.635798	0.125717	0.643001	0.117111
cg03330678	0.202979	0.301615	0.544467	0.188173	0.277498	0.436223	0.589401	0.733139	0.485131	0.0567551	0.154082	0.0316543	0.0785615	0.692151	0.688974	0.0475272	0.0941003	0.128262	0.440496	0.255781	0.078822	0.11487	0.0782781	0.304541	0.765589	0.0682523	0.232011	0.181748	0.0896452	0.620957	0.386828	0.0749513	0.20751	0.617001	0.246255	0.30757	0.348848	0.303772	0.131152	0.795475	0.623255	0.0589532	0.343256	0.640386	0.520872	0.0782558	0.76216	0.0992109	0.522624
cg04727522	0.43661	0.845865	0.537721	0.694862	0.27741	0.399585	0.388881	0.128865	0.237032	0.460727	0.159756	0.507863	0.658088	0.872241	0.892116	0.154017	0.602276	0.752198	0.316374	0.228254	0.683767	0.121635	0.933571	0.207347	0.130507	0.271919	0.791104	0.582721	0.294884	0.50713	0.426971	0.566545	0.64717	0.897683	0.345447	0.452854	0.378611	0.87062	0.346977	0.1127	0.388985	0.212921	0.486594	0.384954	0.19603	0.422598	0.128357	0.166277	0.14785
cg08185661	0.334684	0.0477837	0.031864	0.0112459	0.0407832	0.723725	0.0266831	0.0255927	0.0419143	0.189079	0.185671	0.101581	0.263372	0.0247116	0.912916	0.0253455	0.888167	0.687476	0.0347089	0.649423	0.0929044	0.0118298	0.0458659	0.111359	0.0250174	0.0267459	0.0441875	0.133881	0.0561442	0.187971	0.520689	0.15944	0.0530797	0.584121	0.0681582	0.0262336	0.0378209	0.0136176	0.191581	0.0342965	0.764722	0.0351149	0.0589532	0.0480834	0.0197248	0.0252119	0.0137774	0.155879	0.0174842
cg01333011	0.278615	0.393128	0.66802	0.328492	0.474905	0.219446	0.73103	0.530183	0.137505	0.460029	0.250475	0.77609	0.287402	0.0636266	0.0842307	0.333212	0.107342	0.62007	0.510756	0.424929	0.331285	0.518529	0.667079	0.389201	0.310837	0.381114	0.105527	0.547603	0.113394	0.676996	0.179459	0.488967	0.139633	0.129233	0.348848	0.577859	0.134491	0.543462	0.112402	0.196849	0.625591	0.183253	0.300635	0.376885	0.439871	0.149676	0.667249	0.325512	0.490399
cg24877842	0.213074	0.157223	0.63832	0.142371	0.787153	0.10577	0.271349	0.612857	0.214724	0.246255	0.352318	0.0412515	0.163475	0.715659	0.0453015	0.036893	0.120907	0.450734	0.199648	0.51243	0.111912	0.579326	0.160601	0.304163	0.0574065	0.250208	0.26574	0.294134	0.57613	0.441245	0.198099	0.0423635	0.482906	0.0814345	0.15944	0.563104	0.39104	0.042789	0.274986	0.84667	0.0581901	0.16958	0.0905355	0.731811	0.183947	0.543355	0.465648	0.12409	0.239716
cg07536847	0.0475727	0.402726	0.66384	0.0662092	0.108522	0.591894	0.582163	0.103288	0.168542	0.369515	0.633221	0.06167	0.190353	0.634876	0.393829	0.0676489	0.765846	0.588528	0.0526473	0.544887	0.183947	0.141699	0.46178	0.134783	0.556878	0.102408	0.0896716	0.0992109	0.0759151	0.610942	0.591102	0.170807	0.422837	0.290705	0.46167	0.474382	0.0975877	0.0909671	0.0386879	0.553036	0.247055	0.442406	0.0650224	0.35605	0.452854	0.0721324	0.171483	0.215823	0.538149
cg05026186	0.234195	0.258491	0.497501	0.193634	0.212752	0.0816168	0.549104	0.344834	0.31529	0.131335	0.186597	0.547603	0.648904	0.413932	0.203947	0.525171	0.502996	0.0485912	0.426254	0.286908	0.254045	0.3618	0.41041	0.2083	0.23218	0.18915	0.264581	0.229706	0.192475	0.44071	0.151182	0.590499	0.137563	0.0913177	0.808417	0.70896	0.121808	0.202148	0.139189	0.5782	0.812726	0.105028	0.141643	0.332638	0.384552	0.151022	0.764838	0.161719	0.685101
cg06193397	0.0530609	0.0827506	0.572409	0.0539597	0.491021	0.069989	0.0270481	0.268031	0.0845475	0.141484	0.0934968	0.0842307	0.0763417	0.0481882	0.0554774	0.0709142	0.0983584	0.114672	0.20422	0.131909	0.0875155	0.0365857	0.128956	0.0939855	0.12858	0.0861298	0.0768272	0.0658575	0.0898341	0.133175	0.0654447	0.0914795	0.284076	0.151722	0.308903	0.0696813	0.0556112	0.178848	0.0694385	0.0798319	0.0981006	0.0718784	0.151336	0.133364	0.0756626	0.133979	0.774463	0.384451	0.347287
cg10300684	0.469441	0.574529	0.483446	0.152412	0.369616	0.606294	0.343447	0.0552539	0.11023	0.21082	0.171805	0.36524	0.175574	0.329308	0.756114	0.771859	0.561043	0.119216	0.198619	0.36765	0.190844	0.723867	0.188953	0.0803477	0.0448734	0.270255	0.0691023	0.0999898	0.285594	0.497928	0.404079	0.442911	0.0449981	0.248682	0.0462715	0.15697	0.136737	0.217663	0.0578078	0.0915562	0.76098	0.515398	0.501874	0.0630206	0.100749	0.31529	0.269597	0.565937	0.463384
cg06690548	0.436102	0.399168	0.813911	0.170937	0.647995	0.880233	0.486482	0.880391	0.775087	0.522833	0.483232	0.085576	0.219211	0.806371	0.568162	0.10867	0.51243	0.443781	0.415988	0.711902	0.203216	0.486094	0.458579	0.760513	0.4961	0.461162	0.446943	0.832152	0.662515	0.541948	0.430082	0.404485	0.893851	0.122577	0.369097	0.432005	0.690209	0.324456	0.651326	0.43498	0.279918	0.560319	0.417083	0.543268	0.481548	0.639446	0.843083	0.504108	0.26202
cg12614105	0.116901	0.586413	0.592473	0.180384	0.486482	0.323544	0.496204	0.0719621	0.138224	0.269053	0.252469	0.330801	0.181421	0.622773	0.736489	0.139998	0.664805	0.124738	0.149553	0.19972	0.212045	0.469344	0.117943	0.627232	0.0504391	0.0954942	0.363022	0.127072	0.392202	0.707632	0.51643	0.252729	0.492328	0.767746	0.390952	0.160882	0.439547	0.46158	0.0777365	0.404079	0.699012	0.434574	0.634969	0.489916	0.17281	0.0796281	0.748723	0.361587	0.493529
cg03109316	0.8525	0.837112	0.243971	0.640564	0.488484	0.742943	0.221132	0.527012	0.347392	0.928873	0.460834	0.875626	0.648626	0.425752	0.22473	0.0838624	0.55868	0.872114	0.552327	0.795413	0.55752	0.400018	0.341136	0.56432	0.764838	0.701119	0.352318	0.908594	0.45951	0.498741	0.749612	0.640119	0.783181	0.0971309	0.452152	0.504714	0.770967	0.620957	0.357424	0.33138	0.207428	0.871522	0.750291	0.53051	0.237632	0.52599	0.851422	0.591102	0.877993
cg12680609	0.0811473	0.593727	0.755864	0.174559	0.470252	0.0762611	0.478412	0.69289	0.408889	0.215601	0.861581	0.762891	0.159144	0.558909	0.81371	0.885101	0.754518	0.286045	0.718345	0.298698	0.15528	0.807347	0.66278	0.481439	0.665174	0.110922	0.711902	0.113927	0.85402	0.832666	0.137563	0.692727	0.378397	0.895105	0.41432	0.520281	0.400831	0.413103	0.835659	0.834624	0.876437	0.573409	0.844717	0.808668	0.274135	0.636362	0.857103	0.101098	0.671061
cg09137696	0.0408173	0.0589287	0.21213	0.0607648	0.0794784	0.0342881	0.0262045	0.0425007	0.07597	0.445229	0.0389385	0.0427594	0.17932	0.0304202	0.368691	0.020473	0.0914795	0.0303012	0.060207	0.0411762	0.0714061	0.663122	0.0390006	0.0768272	0.0370986	0.0489211	0.0884442	0.0789713	0.0452464	0.0199317	0.0400557	0.51243	0.0533602	0.0235229	0.0757608	0.0482128	0.0978098	0.0207971	0.0772832	0.861581	0.0557282	0.0329585	0.254872	0.227952	0.562197	0.033914	0.114166	0.0411649	0.0228091
cg13282837	0.635884	0.825505	0.21051	0.160341	0.873035	0.746229	0.87663	0.777385	0.715744	0.799585	0.890646	0.927813	0.299707	0.906496	0.915204	0.246337	0.865641	0.579855	0.761495	0.724987	0.863462	0.952034	0.758595	0.51012	0.95189	0.335703	0.900281	0.269971	0.853361	0.935943	0.301713	0.94483	0.683177	0.964133	0.747856	0.923986	0.515305	0.657905	0.203593	0.923501	0.351641	0.680416	0.840701	0.926834	0.679638	0.880391	0.890059	0.712913	0.841347
cg25465406	0.440593	0.186165	0.240041	0.286531	0.316374	0.55542	0.225581	0.209496	0.121241	0.281294	0.198619	0.232011	0.15944	0.269136	0.281113	0.24768	0.272461	0.0337122	0.0663823	0.0918536	0.114048	0.830102	0.0737933	0.0551633	0.0682857	0.155999	0.223159	0.0627099	0.439028	0.444918	0.0685249	0.498944	0.0658269	0.122876	0.418099	0.321908	0.111797	0.0833775	0.113624	0.591703	0.498556	0.452551	0.462787	0.27403	0.123539	0.261041	0.101918	0.170807	0.660722
cg03975694	0.42688	0.646823	0.0721138	0.589616	0.21051	0.633853	0.370024	0.691231	0.15944	0.370341	0.125717	0.583635	0.293941	0.7359	0.740127	0.726102	0.76202	0.512024	0.0672974	0.542876	0.358038	0.745029	0.502194	0.703211	0.765026	0.296106	0.512331	0.283902	0.78939	0.7556	0.467971	0.764202	0.533475	0.84658	0.126335	0.60085	0.225153	0.552213	0.117387	0.67551	0.815705	0.566948	0.453179	0.10478	0.386934	0.66215	0.0516082	0.544887	0.628081
cg05823029	0.295081	0.384865	0.810851	0.877737	0.8525	0.614207	0.881987	0.80653	0.87299	0.357532	0.518334	0.893362	0.660177	0.787578	0.827567	0.909479	0.276184	0.73866	0.643446	0.281013	0.644887	0.902378	0.816914	0.843133	0.564849	0.46207	0.815445	0.654122	0.77943	0.639824	0.274708	0.841161	0.802735	0.225669	0.805196	0.83025	0.813964	0.685576	0.899079	0.692386	0.229974	0.20853	0.88694	0.889606	0.788173	0.888167	0.831917	0.260557	0.601898
cg04396791	0.508772	0.62732	0.643705	0.187609	0.67568	0.584724	0.703211	0.629108	0.68781	0.409413	0.773265	0.65051	0.407146	0.463477	0.565744	0.545669	0.612195	0.739097	0.685101	0.326209	0.438416	0.184433	0.0571716	0.226669	0.709291	0.341934	0.0372654	0.225334	0.043731	0.526593	0.608553	0.747778	0.452854	0.794245	0.637583	0.719322	0.620262	0.762577	0.816401	0.812358	0.752626	0.487527	0.751333	0.717487	0.634402	0.823137	0.695194	0.610661	0.497296
cg17371081	0.0222786	0.370236	0.024461	0.0112716	0.0473258	0.713302	0.0308792	0.0229198	0.100457	0.0462752	0.0333266	0.0759151	0.383919	0.0227464	0.751934	0.0220431	0.798117	0.020231	0.0174005	0.0251823	0.0362144	0.0297177	0.0436379	0.0476279	0.041263	0.0143372	0.0942656	0.0367504	0.0449336	0.0173713	0.0351335	0.0365369	0.622584	0.396082	0.019955	0.0323814	0.0560912	0.0566112	0.0231249	0.116781	0.775902	0.596608	0.344723	0.022398	0.0859863	0.0132133	0.0229298	0.0955805	0.181488
cg15046693	0.678514	0.292991	0.28682	0.811885	0.206715	0.209893	0.715823	0.317169	0.255781	0.696256	0.496204	0.733689	0.688026	0.098257	0.839011	0.0873129	0.191871	0.797944	0.458782	0.349974	0.592098	0.738371	0.523347	0.292249	0.157933	0.614973	0.217414	0.534152	0.215363	0.122097	0.70635	0.762577	0.443126	0.119706	0.362808	0.357325	0.489597	0.77628	0.16805	0.241332	0.190778	0.464212	0.217177	0.317435	0.48764	0.24781	0.768674	0.661089	0.187749
cg01980637	0.249054	0.0154672	0.664993	0.0133368	0.686242	0.0344019	0.011131	0.00201127	0.0116412	0.0258461	0.0134355	0.0135985	0.0809111	0.621932	0.0104949	0.00944496	0.041784	0.00794315	0.0287763	0.351452	0.0220089	0.0481099	0.0164971	0.0144759	0.028912	0.0147446	0.73232	0.0146367	0.023127	0.0116638	0.0212955	0.525895	0.0190706	0.0105529	0.00201127	0.0162228	0.0110661	0.0178894	0.0106328	0.561996	0.0103231	0.00914587	0.0106418	0.0109762	0.0419568	0.0146624	0.868625	0.0175218	0.00162014
cg14896516	0.0169568	0.0626955	0.0198269	0.129464	0.0426692	0.0723654	0.537121	0.0224648	0.16342	0.0171651	0.016634	0.0541407	0.116252	0.171676	0.274986	0.0245716	0.528705	0.372099	0.273938	0.511722	0.0814345	0.567456	0.0676334	0.0283915	0.0178262	0.013809	0.0617985	0.0302425	0.072558	0.0902087	0.0159826	0.413103	0.0135615	0.483344	0.206796	0.0559463	0.102014	0.0367549	0.0154562	0.253604	0.175366	0.58115	0.703783	0.0250481	0.0211598	0.00992778	0.274896	0.204624	0.546589
cg15539420	0.536614	0.156352	0.0909402	0.0622657	0.146499	0.297154	0.177761	0.535078	0.116121	0.397398	0.0866844	0.598223	0.168732	0.455132	0.0539503	0.230728	0.359158	0.0741723	0.462969	0.115726	0.321315	0.687226	0.0812111	0.307872	0.0651201	0.3278	0.101128	0.30551	0.415455	0.0423455	0.638138	0.453179	0.104924	0.574837	0.296968	0.670394	0.379655	0.0673294	0.200335	0.0806058	0.0603782	0.585608	0.103252	0.102568	0.119506	0.412032	0.444592	0.163899	0.145418
cg21376883	0.161484	0.623543	0.276846	0.409637	0.154443	0.678344	0.126251	0.201384	0.167351	0.421114	0.33683	0.494166	0.278531	0.0427594	0.543268	0.246032	0.759405	0.0806969	0.657272	0.554996	0.185818	0.0957835	0.379317	0.356243	0.0645748	0.132671	0.0925607	0.252469	0.334273	0.630976	0.132996	0.11662	0.127723	0.320316	0.0776233	0.0962861	0.15703	0.239013	0.0992438	0.42586	0.757195	0.204945	0.351452	0.151509	0.215516	0.370441	0.0514224	0.176099	0.74974
cg26186727	0.21952	0.6067	0.252282	0.0559684	0.204154	0.577179	0.466757	0.725789	0.363632	0.545175	0.782765	0.280392	0.305876	0.559406	0.751609	0.0793569	0.723336	0.121673	0.126513	0.453895	0.271152	0.587756	0.434271	0.654033	0.823816	0.0456497	0.542876	0.173886	0.578145	0.684608	0.46705	0.104379	0.335314	0.723108	0.27106	0.0492645	0.211972	0.384145	0.0486946	0.233757	0.795649	0.479863	0.48568	0.143725	0.0621325	0.64029	0.179658	0.164017	0.585034
cg04893119	0.592284	0.618782	0.5325	0.782578	0.268598	0.222478	0.821722	0.629839	0.496794	0.393421	0.248777	0.810607	0.567349	0.785287	0.0888315	0.665711	0.258933	0.257863	0.318033	0.491021	0.36524	0.122054	0.364161	0.287402	0.506836	0.684271	0.274805	0.458782	0.764326	0.186443	0.53691	0.451045	0.799476	0.361685	0.307189	0.201767	0.46207	0.372927	0.695686	0.659357	0.398265	0.6715	0.321315	0.310359	0.653308	0.23333	0.112327	0.355069	0.711902
cg06630567	0.373119	0.487029	0.352618	0.80525	0.697849	0.304737	0.818548	0.776607	0.566948	0.420698	0.395673	0.419024	0.283988	0.87362	0.596411	0.217338	0.850376	0.401503	0.318654	0.551336	0.644532	0.82148	0.44864	0.541519	0.808522	0.382065	0.756646	0.499889	0.71491	0.769545	0.490399	0.799976	0.731166	0.144683	0.867933	0.471108	0.55951	0.886293	0.499267	0.717648	0.840419	0.217663	0.493735	0.496979	0.467361	0.613336	0.242506	0.363632	0.201992
cg11594137	0.394365	0.138786	0.157991	0.6067	0.626839	0.111912	0.380294	0.155765	0.148571	0.422035	0.17905	0.545669	0.256387	0.634141	0.380492	0.0900794	0.120825	0.0442791	0.221465	0.190645	0.483548	0.577465	0.594808	0.129371	0.207998	0.24175	0.150171	0.207592	0.162946	0.0784619	0.308527	0.464009	0.0929592	0.64029	0.128453	0.192026	0.25803	0.648275	0.215977	0.383424	0.784825	0.542876	0.521944	0.127391	0.200736	0.102753	0.448862	0.427287	0.132107
cg08668790	0.23927	0.650419	0.760453	0.115601	0.784517	0.628443	0.690552	0.818743	0.506524	0.177562	0.846041	0.105493	0.449669	0.855486	0.776541	0.912827	0.760065	0.32631	0.753913	0.535078	0.163712	0.806859	0.645733	0.79879	0.0369024	0.16925	0.782021	0.14887	0.614481	0.797944	0.623829	0.796662	0.42141	0.852968	0.406942	0.746995	0.71082	0.775211	0.802686	0.809212	0.824273	0.488967	0.841531	0.799311	0.360991	0.722468	0.835701	0.535887	0.659997
cg20073553	0.381216	0.451852	0.540154	0.195569	0.670976	0.45961	0.524949	0.792773	0.535887	0.330801	0.686415	0.623255	0.197871	0.819662	0.744329	0.934207	0.586413	0.0578311	0.587283	0.223326	0.286531	0.678179	0.492328	0.768011	0.731449	0.163712	0.650132	0.167234	0.778481	0.741198	0.234118	0.87931	0.311488	0.66243	0.711591	0.714766	0.267762	0.252282	0.545563	0.828441	0.675255	0.247299	0.451952	0.676471	0.727173	0.626153	0.674109	0.716443	0.55772
cg25780543	0.408778	0.543462	0.578629	0.421205	0.590707	0.606878	0.637772	0.330611	0.514873	0.151022	0.752561	0.648088	0.473057	0.28462	0.693445	0.552437	0.757124	0.781556	0.288884	0.428142	0.371451	0.62665	0.481127	0.411931	0.755474	0.286045	0.600256	0.359158	0.199648	0.643001	0.574733	0.532613	0.315909	0.565153	0.174359	0.261666	0.599026	0.862943	0.255243	0.111359	0.291955	0.628831	0.709754	0.0925841	0.125853	0.701836	0.711824	0.399271	0.685906
cg12302621	0.520188	0.916628	0.79215	0.88008	0.916393	0.859212	0.224811	0.329118	0.868384	0.550333	0.786329	0.3725	0.65051	0.907564	0.934782	0.787215	0.861537	0.952526	0.719402	0.877413	0.772946	0.825397	0.806642	0.7786	0.844456	0.812106	0.904798	0.823711	0.868782	0.900765	0.66278	0.871606	0.904557	0.818155	0.814114	0.90624	0.673517	0.843866	0.496698	0.829506	0.906496	0.373926	0.594306	0.487129	0.839494	0.772238	0.101005	0.283335	0.922533
cg23242898	0.0705914	0.571744	0.0608617	0.0862574	0.263372	0.557117	0.155707	0.0602556	0.0736506	0.104605	0.342862	0.0499524	0.0692981	0.0802199	0.553036	0.246791	0.736624	0.667	0.110041	0.205021	0.0992438	0.289061	0.0693128	0.0891164	0.135403	0.0916109	0.0498073	0.0838116	0.347177	0.873733	0.130875	0.153786	0.268881	0.0821762	0.0803256	0.0793392	0.135209	0.123789	0.135898	0.0658575	0.748366	0.337033	0.805645	0.0904009	0.0719127	0.0900292	0.328102	0.144683	0.627232
cg10234985	0.567666	0.178651	0.822538	0.296372	0.741784	0.126251	0.687073	0.787281	0.276097	0.666223	0.148303	0.726102	0.437892	0.686242	0.883189	0.646473	0.335002	0.584829	0.405289	0.135603	0.307872	0.375346	0.580739	0.828391	0.305965	0.288399	0.800095	0.425247	0.199428	0.820925	0.66393	0.672804	0.515305	0.510648	0.544585	0.419449	0.25264	0.841849	0.242506	0.731229	0.3618	0.584622	0.382583	0.571744	0.446207	0.186733	0.794482	0.640386	0.559714
cg05899618	0.0512808	0.348116	0.119506	0.177902	0.0398133	0.569221	0.0330069	0.0716149	0.046881	0.0486062	0.0853608	0.228507	0.155707	0.701603	0.159313	0.0744799	0.177971	0.0194865	0.413103	0.478317	0.079017	0.287663	0.0425374	0.328909	0.0220903	0.0461239	0.0264057	0.0470599	0.0536557	0.711665	0.28643	0.686914	0.0499192	0.83167	0.200961	0.0551328	0.0399447	0.0283537	0.0338361	0.357325	0.782698	0.347496	0.200022	0.0942656	0.359465	0.555308	0.0417006	0.0364988	0.128453
cg16864658	0.0292892	0.559014	0.172926	0.0831878	0.06167	0.278707	0.319456	0.0623574	0.0817921	0.096556	0.0576252	0.458782	0.127024	0.147523	0.263941	0.693445	0.546388	0.0435687	0.0646591	0.296195	0.29061	0.322101	0.683349	0.10052	0.261041	0.0536345	0.268132	0.0998254	0.097311	0.70295	0.0686526	0.0852396	0.0947084	0.774723	0.283988	0.550727	0.0819049	0.54537	0.0366001	0.133091	0.797291	0.117347	0.372396	0.259107	0.0406772	0.0830311	0.0671296	0.0419568	0.574232
cg13795840	0.310447	0.436511	0.465648	0.322657	0.612483	0.496507	0.934729	0.525266	0.858959	0.32246	0.408456	0.624202	0.336543	0.935309	0.871733	0.348947	0.386391	0.630674	0.614881	0.545282	0.563205	0.733993	0.697366	0.706506	0.100022	0.396713	0.583635	0.540154	0.748789	0.4204	0.625138	0.765219	0.765155	0.411313	0.867307	0.63357	0.629017	0.891453	0.469441	0.401709	0.197871	0.306635	0.524636	0.689693	0.66883	0.679477	0.0690556	0.273282	0.135651
cg17834752	0.0785615	0.575329	0.0203408	0.0127895	0.0454241	0.513231	0.0186612	0.0627755	0.0200984	0.033047	0.0246097	0.405289	0.100022	0.379772	0.630582	0.0142481	0.63832	0.0163635	0.0217527	0.365924	0.0516971	0.0210266	0.148977	0.578544	0.0474192	0.0118621	0.0204581	0.0255492	0.261219	0.551917	0.159818	0.0230673	0.461976	0.632361	0.0357953	0.0501885	0.0581462	0.032473	0.0327978	0.0192917	0.747146	0.456293	0.447432	0.0631169	0.0161564	0.0106924	0.0230962	0.133411	0.548508
cg06736444	0.836734	0.738582	0.340931	0.915074	0.889817	0.422035	0.73232	0.90913	0.761188	0.902147	0.888042	0.910078	0.666223	0.896252	0.870359	0.948855	0.625267	0.902419	0.853189	0.842402	0.79745	0.854779	0.88912	0.343841	0.173561	0.815809	0.875909	0.610942	0.474382	0.90913	0.859677	0.920128	0.923784	0.963096	0.887923	0.909561	0.83486	0.94102	0.948182	0.298489	0.895477	0.583635	0.873733	0.633494	0.701603	0.835321	0.820531	0.608553	0.834424
cg27285599	0.888808	0.46645	0.598319	0.376988	0.452551	0.705062	0.874635	0.830633	0.571744	0.631074	0.668652	0.382882	0.556208	0.321711	0.534563	0.33283	0.505315	0.954309	0.368579	0.777439	0.772238	0.271733	0.455334	0.499267	0.524118	0.885524	0.5043	0.874381	0.417905	0.35845	0.922419	0.453795	0.570831	0.800037	0.716628	0.423675	0.60533	0.545465	0.604681	0.269881	0.459005	0.890021	0.55397	0.488178	0.840284	0.49846	0.290428	0.907784	0.350471
cg18239753	0.100818	0.0907196	0.084636	0.103558	0.0863896	0.382583	0.0607764	0.458155	0.265562	0.203593	0.139189	0.518764	0.290341	0.340212	0.543462	0.159257	0.0483292	0.512122	0.057685	0.444918	0.276097	0.405808	0.417083	0.39699	0.610371	0.175574	0.0912916	0.166782	0.662961	0.516541	0.575629	0.178186	0.481127	0.0456215	0.0738673	0.103353	0.104888	0.298207	0.079187	0.0740976	0.670902	0.418801	0.492112	0.0800654	0.158724	0.421307	0.0961984	0.228183	0.0620182
cg22487322	0.727096	0.491219	0.62798	0.261041	0.502405	0.439983	0.762859	0.585698	0.45618	0.560517	0.454942	0.150389	0.55183	0.268411	0.137966	0.0912916	0.246875	0.480907	0.472657	0.768469	0.367449	0.906046	0.349974	0.654294	0.932593	0.730359	0.854146	0.936108	0.774207	0.234628	0.634402	0.291478	0.645653	0.338629	0.598606	0.47687	0.610852	0.119828	0.285785	0.462582	0.215128	0.727972	0.407146	0.467971	0.51726	0.547996	0.936779	0.400528	0.284917
cg06490988	0.346768	0.3623	0.330511	0.170993	0.310638	0.73612	0.401264	0.337527	0.239878	0.345954	0.168295	0.213396	0.559406	0.833698	0.11251	0.21929	0.0809928	0.33993	0.258574	0.603492	0.21267	0.192174	0.203593	0.581755	0.175435	0.304541	0.21128	0.221132	0.201102	0.318552	0.566545	0.10608	0.142221	0.796947	0.325406	0.253521	0.46178	0.148303	0.378796	0.206637	0.548807	0.464107	0.387659	0.364594	0.353864	0.569221	0.892329	0.574437	0.189213
cg19863740	0.659254	0.393332	0.704821	0.846535	0.341624	0.200886	0.418099	0.645165	0.362092	0.751007	0.539556	0.865603	0.806216	0.711054	0.854624	0.281568	0.146768	0.724405	0.691067	0.42409	0.82705	0.809042	0.767945	0.70221	0.864292	0.74597	0.809212	0.669968	0.360088	0.202365	0.497079	0.299254	0.164145	0.402325	0.577859	0.460944	0.311771	0.800748	0.313641	0.51446	0.411218	0.863332	0.484497	0.297925	0.582163	0.542451	0.890338	0.528608	0.554488
cg18877514	0.54226	0.827417	0.804148	0.833796	0.865641	0.863831	0.961328	0.591102	0.831011	0.801749	0.935779	0.918494	0.890646	0.967228	0.934729	0.362703	0.793392	0.928289	0.753565	0.900891	0.841347	0.353538	0.953363	0.842944	0.249674	0.797291	0.523444	0.924696	0.490597	0.910717	0.829409	0.899778	0.816859	0.470997	0.79745	0.521606	0.792434	0.954897	0.723415	0.561794	0.405191	0.820228	0.644532	0.807248	0.479343	0.859378	0.946961	0.610761	0.27375
cg21578541	0.877205	0.781138	0.709443	0.218719	0.634684	0.705878	0.838099	0.581844	0.280392	0.80958	0.806216	0.426154	0.814217	0.865436	0.908804	0.326006	0.79362	0.514873	0.480816	0.756046	0.514357	0.445341	0.281381	0.718494	0.913243	0.772887	0.740338	0.668112	0.484191	0.931565	0.829361	0.356716	0.534976	0.959986	0.578834	0.464319	0.433534	0.866691	0.403458	0.460727	0.690818	0.907867	0.485013	0.640119	0.403239	0.689215	0.203733	0.83945	0.888808
cg04856858	0.135403	0.13282	0.126206	0.0231433	0.432322	0.0355225	0.397501	0.187893	0.137201	0.0524973	0.745029	0.29468	0.0390108	0.374615	0.0276332	0.27741	0.115924	0.540877	0.428038	0.0268679	0.292058	0.681781	0.31529	0.0337464	0.222049	0.0370361	0.693288	0.0707276	0.382065	0.272369	0.0543446	0.742102	0.0869121	0.0328504	0.41688	0.469546	0.152071	0.474598	0.510541	0.550014	0.465535	0.0292962	0.381216	0.251333	0.131861	0.070815	0.63357	0.0633237	0.138224
cg13870866	0.462274	0.616899	0.278615	0.0607993	0.318134	0.562097	0.557325	0.13502	0.160238	0.15218	0.0956097	0.396713	0.252729	0.645911	0.679895	0.349065	0.72492	0.260462	0.0593915	0.471307	0.268971	0.100655	0.544795	0.0818122	0.032425	0.194342	0.283335	0.183679	0.0820823	0.397703	0.422953	0.550333	0.503519	0.823921	0.430716	0.0837848	0.28682	0.314422	0.382583	0.0461393	0.732465	0.49022	0.428969	0.0574065	0.453568	0.622584	0.271919	0.438714	0.103252
cg04806409	0.387766	0.318654	0.716628	0.238386	0.943272	0.280098	0.894693	0.363433	0.572612	0.335223	0.341136	0.194723	0.347905	0.155999	0.0613657	0.316572	0.333884	0.257438	0.378889	0.474804	0.206871	0.226921	0.383919	0.511075	0.593531	0.266003	0.255053	0.813511	0.587283	0.0743557	0.29061	0.329118	0.528103	0.0488953	0.654569	0.702868	0.736195	0.170807	0.494367	0.252282	0.107716	0.186881	0.337931	0.645653	0.306431	0.856211	0.132901	0.270443	0.127818
cg05522383	0.0996971	0.170683	0.703307	0.137807	0.117866	0.259281	0.0784037	0.0705236	0.431785	0.0902372	0.438928	0.22473	0.200335	0.0580611	0.0541708	0.249588	0.56189	0.134024	0.123583	0.117659	0.191077	0.766708	0.579952	0.172996	0.335604	0.225581	0.140858	0.0991796	0.326591	0.108741	0.102983	0.249944	0.104856	0.0411536	0.775776	0.191295	0.152412	0.101887	0.255862	0.16359	0.316108	0.103986	0.23325	0.215289	0.355368	0.0468485	0.117659	0.174422	0.115893
cg26200585	0.650782	0.751203	0.779605	0.68136	0.768153	0.846126	0.870441	0.558085	0.826561	0.539265	0.451653	0.480498	0.187609	0.946407	0.270443	0.52841	0.879481	0.518334	0.526897	0.597809	0.653947	0.816175	0.719027	0.502194	0.816502	0.138984	0.874893	0.517907	0.805032	0.0601431	0.684608	0.839543	0.876672	0.855967	0.777876	0.749199	0.68872	0.59941	0.571744	0.733919	0.769675	0.600452	0.428038	0.851291	0.439983	0.559119	0.779605	0.713781	0.672029
cg26530341	0.680675	0.637009	0.787524	0.852625	0.269053	0.8878	0.837884	0.4209	0.400741	0.870108	0.544795	0.875132	0.839405	0.807988	0.915158	0.252025	0.839183	0.859212	0.292715	0.547202	0.864768	0.906496	0.712684	0.553036	0.373718	0.902994	0.741859	0.809096	0.264952	0.916438	0.666829	0.657181	0.753102	0.189439	0.580538	0.17281	0.535887	0.923369	0.447852	0.255517	0.311023	0.601527	0.541316	0.591302	0.621057	0.627622	0.897602	0.586505	0.383311
cg18815943	0.0303148	0.0190198	0.0271803	0.136343	0.0446082	0.425647	0.0180454	0.0290804	0.0767675	0.0369175	0.0274953	0.674022	0.0625022	0.013684	0.71613	0.0185428	0.0266703	0.00908533	0.0237754	0.358754	0.0962861	0.447153	0.0472185	0.0326543	0.00711388	0.0207688	0.127298	0.0639249	0.0258815	0.0373822	0.0263998	0.0148398	0.0897759	0.0234882	0.0982871	0.015088	0.0290089	0.0243579	0.0189517	0.0246208	0.0106863	0.0276365	0.0194702	0.157448	0.0151924	0.0202767	0.0111458	0.0623066	0.485785
cg17651821	0.0827765	0.0569557	0.0595695	0.468693	0.528103	0.578544	0.401614	0.447153	0.0596313	0.111839	0.0488146	0.486705	0.231929	0.0683341	0.064103	0.0364179	0.106322	0.0644308	0.0697142	0.0922626	0.143834	0.0453304	0.0445327	0.0711003	0.0528245	0.119055	0.082269	0.0484947	0.0411237	0.509089	0.306135	0.280926	0.153954	0.519878	0.0826226	0.31619	0.0553651	0.721919	0.0359301	0.377402	0.605617	0.12777	0.0303329	0.0390641	0.04762	0.549414	0.585506	0.0833084	0.545465
cg11492040	0.528211	0.458894	0.690643	0.249674	0.524439	0.809689	0.30692	0.535887	0.856597	0.502089	0.751007	0.119788	0.182424	0.933238	0.287663	0.220085	0.328815	0.19745	0.409413	0.609322	0.233417	0.846965	0.375659	0.539449	0.63145	0.302397	0.596873	0.746301	0.714615	0.109225	0.570831	0.24789	0.643105	0.164713	0.69395	0.417994	0.543067	0.223061	0.48061	0.826898	0.327513	0.577766	0.566948	0.443241	0.624389	0.819364	0.885693	0.593221	0.19572
cg03055440	0.925674	0.764778	0.344834	0.604777	0.825244	0.648459	0.749464	0.636167	0.842589	0.90517	0.841705	0.605798	0.611906	0.598406	0.543355	0.551016	0.335118	0.586198	0.824273	0.886169	0.589807	0.442099	0.726405	0.249588	0.834989	0.808251	0.521511	0.77352	0.370236	0.820727	0.922935	0.527395	0.768928	0.742441	0.784261	0.381848	0.444095	0.787313	0.810165	0.441554	0.803932	0.939725	0.563807	0.317649	0.766181	0.634402	0.699176	0.943456	0.867351
cg27285720	0.0703226	0.232343	0.425647	0.652944	0.0787844	0.233087	0.591703	0.776945	0.125717	0.0943577	0.157281	0.602366	0.432234	0.624479	0.675337	0.27937	0.353227	0.306733	0.0851907	0.286235	0.208868	0.611235	0.433845	0.772381	0.601335	0.308527	0.42534	0.452971	0.616407	0.340728	0.0744429	0.212431	0.33683	0.551336	0.221694	0.237804	0.191799	0.591703	0.100552	0.52139	0.614973	0.126034	0.314995	0.204798	0.499373	0.359158	0.631532	0.273391	0.45981
cg21960110	0.534976	0.30209	0.634489	0.490399	0.771032	0.904838	0.707151	0.419123	0.811005	0.56565	0.251333	0.906371	0.831424	0.683853	0.12443	0.83092	0.213739	0.478118	0.555615	0.83327	0.418202	0.923594	0.447945	0.227642	0.701757	0.612857	0.442509	0.30969	0.571043	0.313047	0.35813	0.420497	0.688228	0.0531569	0.573605	0.930983	0.765718	0.334379	0.585414	0.575034	0.186881	0.760196	0.560225	0.715204	0.873811	0.829361	0.234322	0.582264	0.852758
cg23276695	0.336009	0.220821	0.544887	0.388465	0.548101	0.14263	0.496407	0.581248	0.246963	0.791045	0.265046	0.653036	0.365612	0.571636	0.0767874	0.522942	0.215601	0.569397	0.295614	0.783464	0.54537	0.125501	0.304062	0.194723	0.103957	0.686643	0.392918	0.536407	0.698304	0.242418	0.390644	0.200534	0.246425	0.298742	0.174755	0.683023	0.412998	0.498249	0.215289	0.296471	0.144683	0.792434	0.256387	0.17724	0.366807	0.242835	0.21051	0.313842	0.671581
cg14258236	0.851729	0.748851	0.299254	0.551336	0.862736	0.781897	0.887923	0.862003	0.638055	0.465535	0.419237	0.544977	0.733769	0.696619	0.878312	0.0697485	0.824027	0.764661	0.884084	0.881283	0.615355	0.122142	0.672208	0.365826	0.511394	0.732692	0.79362	0.784825	0.479044	0.508475	0.865724	0.589898	0.757195	0.873987	0.537617	0.253604	0.899323	0.879523	0.705963	0.200335	0.328295	0.748723	0.660638	0.43852	0.628252	0.427709	0.580739	0.787215	0.863788
cg12535715	0.833364	0.53081	0.49384	0.803762	0.233087	0.644712	0.149731	0.718564	0.775596	0.623543	0.780224	0.857488	0.545175	0.728836	0.888084	0.146159	0.776158	0.610567	0.430716	0.732177	0.558381	0.888288	0.707784	0.823315	0.629565	0.50713	0.281662	0.662243	0.863111	0.877694	0.788002	0.894203	0.455132	0.898595	0.372819	0.167795	0.719096	0.87007	0.202673	0.297543	0.897034	0.799919	0.583444	0.604582	0.390347	0.456722	0.928185	0.781556	0.819864
cg03400060	0.679016	0.286531	0.743282	0.606789	0.698386	0.734689	0.809742	0.201173	0.826359	0.701119	0.762096	0.584928	0.144424	0.828145	0.855655	0.658278	0.722611	0.73612	0.40104	0.493041	0.720255	0.889484	0.81534	0.656363	0.20329	0.313136	0.670976	0.328709	0.829551	0.847324	0.566641	0.933685	0.336222	0.41688	0.787639	0.56115	0.30881	0.89961	0.152847	0.9139	0.871647	0.548706	0.27824	0.920213	0.641811	0.469546	0.82432	0.616505	0.661089
cg27420123	0.421926	0.300927	0.437892	0.717407	0.551016	0.195797	0.73239	0.669534	0.284076	0.332252	0.272055	0.8722	0.686735	0.158127	0.74845	0.0654034	0.164581	0.765782	0.332155	0.587947	0.562699	0.106392	0.812726	0.337237	0.0996042	0.757124	0.151833	0.565837	0.402627	0.250899	0.302891	0.563807	0.462877	0.211125	0.368165	0.467585	0.271919	0.235654	0.403239	0.104248	0.22616	0.384244	0.336438	0.38538	0.476574	0.315203	0.289155	0.355565	0.624964
cg17890764	0.209416	0.355462	0.466942	0.494766	0.738873	0.490503	0.507355	0.5634	0.471108	0.191077	0.513031	0.301798	0.483446	0.779306	0.123721	0.602276	0.555615	0.659357	0.380612	0.48918	0.338131	0.611141	0.382882	0.746792	0.631903	0.263105	0.680416	0.243081	0.778002	0.0689901	0.194494	0.5634	0.51002	0.419658	0.595922	0.683604	0.596207	0.264865	0.638138	0.599207	0.105425	0.153127	0.446526	0.760196	0.34032	0.638883	0.550914	0.192774	0.543675
cg15271616	0.208072	0.463585	0.0947084	0.145843	0.465843	0.152963	0.226501	0.103189	0.150554	0.0380246	0.29667	0.0684606	0.0656788	0.0458439	0.0909131	0.269417	0.330697	0.348745	0.0944728	0.136268	0.0695664	0.271152	0.0699219	0.0790988	0.0948251	0.171421	0.238927	0.179254	0.109048	0.0616981	0.101355	0.127723	0.117302	0.645733	0.0941298	0.0935818	0.178583	0.10577	0.309198	0.0366644	0.760911	0.101098	0.654929	0.206324	0.104959	0.257863	0.397703	0.0467438	0.841751
cg26164184	0.737169	0.774013	0.69503	0.902829	0.710286	0.497079	0.905899	0.412371	0.922981	0.952189	0.532613	0.923687	0.946657	0.247723	0.179858	0.68814	0.384038	0.906794	0.959242	0.867472	0.901064	0.942261	0.888208	0.609996	0.93042	0.915074	0.925628	0.898678	0.494257	0.823872	0.931509	0.962304	0.702999	0.352908	0.750547	0.89381	0.864469	0.660363	0.637397	0.655207	0.331859	0.91529	0.875178	0.890338	0.915158	0.88833	0.95755	0.68342	0.779176
cg22461835	0.0530333	0.594122	0.350262	0.486386	0.143076	0.45114	0.0441664	0.0664444	0.140508	0.251499	0.365826	0.411931	0.136593	0.527012	0.644621	0.23184	0.616114	0.0597898	0.070783	0.243005	0.131105	0.720557	0.102812	0.117347	0.301212	0.162882	0.120863	0.135452	0.432726	0.667418	0.462681	0.349467	0.210434	0.289718	0.0814543	0.0724853	0.409637	0.0729788	0.0621078	0.415988	0.817135	0.228346	0.30551	0.183395	0.0594047	0.0672667	0.0827506	0.116946	0.477798
cg10362475	0.702868	0.804533	0.858367	0.444806	0.904924	0.732177	0.893894	0.83234	0.8509	0.619288	0.832884	0.862861	0.6932	0.841212	0.713374	0.622125	0.879395	0.906921	0.516117	0.520473	0.646192	0.663214	0.222138	0.262925	0.907213	0.454513	0.302397	0.318351	0.13167	0.75846	0.697922	0.952189	0.760776	0.88072	0.845379	0.859378	0.888208	0.942495	0.945581	0.924179	0.876515	0.733069	0.817741	0.885445	0.849673	0.965937	0.895693	0.811111	0.624019
cg02994956	0.44631	0.702617	0.194342	0.350974	0.407639	0.618323	0.699561	0.402208	0.365515	0.637487	0.66243	0.495322	0.376784	0.532729	0.70295	0.795532	0.687073	0.731664	0.730436	0.615355	0.294781	0.609322	0.552834	0.593429	0.111912	0.206562	0.38227	0.389958	0.487129	0.716628	0.66384	0.709599	0.513231	0.737499	0.655022	0.596023	0.533475	0.644621	0.404587	0.63013	0.664471	0.657349	0.647814	0.307103	0.224904	0.255694	0.112364	0.302787	0.615907
cg24477636	0.578727	0.686415	0.914201	0.284439	0.59471	0.569397	0.349168	0.599207	0.473274	0.802032	0.444918	0.807025	0.803988	0.867117	0.552533	0.399168	0.835414	0.344178	0.82926	0.822288	0.72123	0.364918	0.378295	0.317649	0.679804	0.712847	0.886487	0.787877	0.415759	0.515305	0.795811	0.684027	0.832193	0.742725	0.335604	0.71206	0.575429	0.742943	0.328295	0.144099	0.806155	0.822083	0.331763	0.352522	0.392824	0.391775	0.783341	0.610188	0.665436
cg03297731	0.385176	0.322754	0.80015	0.629017	0.464538	0.191366	0.600646	0.711294	0.367963	0.385987	0.807829	0.666489	0.778128	0.220982	0.77371	0.83495	0.297825	0.155707	0.615643	0.607799	0.726709	0.799919	0.732106	0.610371	0.720702	0.666489	0.839011	0.437684	0.73801	0.385987	0.31452	0.762096	0.643619	0.0661329	0.274135	0.635437	0.452971	0.781317	0.7182	0.559928	0.216614	0.427822	0.746509	0.711054	0.468077	0.661089	0.750082	0.441981	0.307476
cg14384532	0.295258	0.321711	0.0447399	0.038548	0.0560588	0.399811	0.078071	0.0440264	0.127952	0.399479	0.209977	0.125994	0.308245	0.0308391	0.434271	0.0279706	0.737637	0.0650091	0.0664444	0.466151	0.0671458	0.0417607	0.0930501	0.0627755	0.0303572	0.0322285	0.0426013	0.0684933	0.376784	0.206796	0.360385	0.0806732	0.550914	0.607358	0.0302312	0.0560038	0.0586511	0.075551	0.0278447	0.291201	0.0765959	0.56565	0.0507444	0.316374	0.0524491	0.0264209	0.0475653	0.436892	0.0389216
cg12951282	0.262196	0.176099	0.192395	0.524439	0.653674	0.212358	0.51446	0.575239	0.182697	0.26923	0.515204	0.685738	0.721682	0.575239	0.117823	0.61314	0.160341	0.20329	0.516644	0.501874	0.472862	0.742868	0.286632	0.238927	0.637116	0.633945	0.718564	0.212587	0.403867	0.495719	0.4093	0.573913	0.0893752	0.177372	0.695846	0.736954	0.36426	0.525803	0.660818	0.453074	0.513331	0.528705	0.625045	0.777066	0.60789	0.799976	0.701681	0.341724	0.722069
cg18771300	0.216465	0.786509	0.425541	0.785637	0.827611	0.1952	0.577367	0.337237	0.39908	0.568366	0.720702	0.584622	0.624762	0.582528	0.771537	0.249143	0.818645	0.733069	0.680938	0.244375	0.665794	0.725209	0.787877	0.540363	0.250639	0.295614	0.146604	0.166531	0.731166	0.741784	0.207176	0.781556	0.643001	0.777876	0.575429	0.798277	0.840039	0.597341	0.53338	0.878598	0.192252	0.248151	0.147741	0.338131	0.608553	0.30692	0.293659	0.603136	0.518529
cg22373097	0.596411	0.506244	0.377497	0.313943	0.359865	0.249859	0.87253	0.61908	0.535673	0.46178	0.261387	0.642155	0.483973	0.132671	0.539749	0.196402	0.23333	0.251245	0.538043	0.474382	0.575137	0.154017	0.450937	0.487527	0.160478	0.579745	0.239368	0.70635	0.327405	0.876188	0.317169	0.202789	0.591449	0.299628	0.401388	0.282618	0.656721	0.336108	0.361298	0.181488	0.256835	0.589898	0.288788	0.283165	0.464107	0.490919	0.317345	0.33903	0.821871
cg05521696	0.3278	0.460944	0.634876	0.211427	0.420599	0.436994	0.347705	0.469741	0.145843	0.405396	0.501006	0.562906	0.253702	0.553554	0.669884	0.451606	0.502614	0.0775213	0.286908	0.245982	0.105877	0.591302	0.376379	0.560953	0.100781	0.0880203	0.509197	0.067664	0.789792	0.506436	0.42688	0.517688	0.301615	0.822083	0.465648	0.549104	0.0498933	0.393421	0.0731972	0.656001	0.788933	0.382785	0.553245	0.697922	0.193842	0.322934	0.652681	0.586989	0.474024
cg13901526	0.0443583	0.223919	0.135651	0.546702	0.365726	0.0458789	0.391673	0.633668	0.135209	0.200181	0.792091	0.356821	0.0268984	0.631267	0.209104	0.452152	0.323034	0.0856717	0.269778	0.221132	0.371031	0.351832	0.354275	0.616305	0.519878	0.178651	0.685994	0.0569219	0.434474	0.706036	0.148748	0.0388835	0.192916	0.743007	0.361587	0.212587	0.321908	0.378087	0.33283	0.428661	0.0883442	0.160767	0.535574	0.440593	0.326897	0.071201	0.708634	0.0693749	0.508978
cg13062935	0.764527	0.210211	0.526407	0.73801	0.593124	0.171143	0.663392	0.774463	0.49846	0.764527	0.491219	0.883349	0.843181	0.53124	0.938035	0.586604	0.110334	0.653576	0.713781	0.548906	0.816448	0.134256	0.665174	0.593124	0.52599	0.794582	0.514982	0.467971	0.221214	0.869948	0.793392	0.687985	0.116289	0.136943	0.685576	0.840512	0.480087	0.722548	0.624389	0.336334	0.649244	0.773206	0.539961	0.665711	0.886738	0.536	0.856719	0.814217	0.79672
cg12593411	0.398481	0.776882	0.789574	0.188816	0.502996	0.746509	0.7556	0.763402	0.641284	0.708713	0.269881	0.247299	0.348116	0.913644	0.921253	0.473387	0.752063	0.209183	0.422138	0.650419	0.322101	0.298392	0.306431	0.408144	0.942495	0.522942	0.798725	0.727766	0.764661	0.90684	0.60219	0.30425	0.702291	0.739307	0.43748	0.701836	0.369807	0.902576	0.386484	0.616114	0.907564	0.786687	0.24504	0.31581	0.502614	0.653576	0.891745	0.750827	0.858872
cg06291867	0.110886	0.0714557	0.669707	0.0761828	0.118729	0.485241	0.247971	0.0413184	0.210667	0.204382	0.261486	0.527395	0.242418	0.101066	0.686495	0.30881	0.66008	0.625505	0.0479618	0.30209	0.204945	0.581248	0.190218	0.148188	0.114124	0.171352	0.135854	0.167859	0.125224	0.430508	0.545968	0.192318	0.103523	0.41041	0.102536	0.0817017	0.0801306	0.129744	0.0439867	0.589501	0.731094	0.493231	0.56432	0.074263	0.549104	0.0873904	0.0670545	0.101229	0.308346
cg19580810	0.562699	0.432423	0.767482	0.302191	0.799311	0.232011	0.242668	0.339425	0.340212	0.474698	0.340931	0.191441	0.317756	0.794582	0.154497	0.231368	0.458782	0.300635	0.276274	0.404379	0.343645	0.618706	0.345447	0.53702	0.498556	0.538149	0.772311	0.606507	0.776607	0.145586	0.432923	0.288788	0.637219	0.219678	0.521722	0.30569	0.70817	0.184288	0.865393	0.345238	0.210434	0.378701	0.251667	0.75867	0.413103	0.824952	0.147741	0.320711	0.188538
cg10321723	0.78085	0.877	0.956925	0.580442	0.483232	0.404587	0.927033	0.939836	0.899954	0.805473	0.739921	0.790245	0.704666	0.177627	0.945759	0.844456	0.630037	0.93109	0.873574	0.774655	0.642071	0.757049	0.631349	0.811215	0.920783	0.920682	0.834771	0.896696	0.917023	0.898475	0.622504	0.783181	0.808668	0.417714	0.936219	0.891214	0.934571	0.949847	0.727542	0.902198	0.934207	0.557007	0.768276	0.831868	0.903237	0.929174	0.913058	0.5552	0.884448
cg09551147	0.0153695	0.524334	0.0186612	0.0196895	0.0190448	0.0545185	0.0220759	0.0237948	0.0154647	0.0257288	0.0295936	0.0463061	0.013739	0.22859	0.0906924	0.155816	0.817847	0.0155732	0.0370986	0.426574	0.0235945	0.258127	0.028241	0.250306	0.011955	0.0186388	0.0198549	0.0214657	0.0152593	0.192174	0.0841823	0.0286318	0.0386248	0.193136	0.0355702	0.0172403	0.0199215	0.0146792	0.0218132	0.0170886	0.622303	0.69949	0.0832153	0.0165153	0.0421959	0.0203459	0.0109361	0.082243	0.85917
cg10275770	0.249588	0.579016	0.55752	0.312756	0.712761	0.0715791	0.546897	0.68872	0.731166	0.175832	0.451752	0.0833995	0.501006	0.404277	0.755416	0.342762	0.402109	0.71917	0.431487	0.426254	0.61458	0.51697	0.523048	0.539556	0.708259	0.548706	0.723336	0.170485	0.670655	0.79587	0.19979	0.572107	0.185671	0.542149	0.371263	0.70039	0.197155	0.85466	0.307476	0.606608	0.837959	0.140255	0.370553	0.67057	0.423887	0.202445	0.757992	0.383217	0.571744
cg01541443	0.931565	0.747648	0.655435	0.316784	0.645165	0.892923	0.549923	0.442811	0.752422	0.86653	0.708414	0.281835	0.46705	0.244051	0.577577	0.436791	0.539848	0.904396	0.822288	0.860346	0.597341	0.509414	0.462168	0.699412	0.527395	0.764661	0.560422	0.940841	0.702868	0.812407	0.938852	0.362199	0.714023	0.436223	0.399271	0.4961	0.667	0.816077	0.326591	0.759007	0.302289	0.926304	0.403458	0.584573	0.482075	0.540561	0.842263	0.924459	0.814515
cg24110050	0.380492	0.535673	0.556298	0.39699	0.644073	0.462489	0.512122	0.643001	0.543173	0.351167	0.510541	0.605056	0.391875	0.675606	0.705472	0.758256	0.562906	0.055113	0.526593	0.326689	0.298881	0.481127	0.135069	0.724562	0.0956097	0.259549	0.0459785	0.0851641	0.345742	0.613532	0.269778	0.5552	0.314222	0.714396	0.602559	0.72349	0.33852	0.672976	0.057867	0.57964	0.742943	0.426472	0.318237	0.336543	0.314029	0.0539819	0.736823	0.669172	0.602276
cg23413307	0.593727	0.323544	0.305323	0.249758	0.642257	0.170235	0.489821	0.757925	0.260011	0.742441	0.342343	0.53081	0.640027	0.354366	0.337133	0.0691321	0.302191	0.635157	0.657445	0.605711	0.352802	0.107682	0.259107	0.335904	0.398878	0.780157	0.535365	0.726629	0.220246	0.363746	0.813241	0.11914	0.487129	0.189365	0.297632	0.411825	0.516117	0.476345	0.224811	0.20934	0.139035	0.896171	0.224904	0.246082	0.708092	0.324939	0.474382	0.286908	0.298881
cg03439703	0.275356	0.296471	0.434879	0.426472	0.505424	0.271349	0.622218	0.675945	0.479755	0.196849	0.608755	0.674345	0.48312	0.227481	0.836031	0.601805	0.357841	0.888208	0.580949	0.354572	0.455647	0.74135	0.595521	0.547202	0.477188	0.334684	0.650419	0.234283	0.69949	0.440296	0.164525	0.744742	0.341934	0.905983	0.666916	0.713693	0.586505	0.659182	0.664993	0.431487	0.63013	0.150788	0.644073	0.542976	0.426154	0.444394	0.517489	0.187026	0.168992
cg00061629	0.767542	0.814929	0.866823	0.58523	0.768928	0.848226	0.882869	0.355752	0.537334	0.812673	0.58971	0.949394	0.346652	0.926582	0.752279	0.866907	0.771569	0.786973	0.885021	0.688067	0.334583	0.956682	0.87007	0.430614	0.938149	0.690416	0.598815	0.797613	0.361685	0.897115	0.867714	0.954234	0.603407	0.736195	0.834031	0.664567	0.812933	0.965535	0.861186	0.955115	0.964519	0.270885	0.950189	0.885225	0.541628	0.873072	0.921154	0.56565	0.845422
cg13906813	0.159625	0.665621	0.321666	0.659254	0.743282	0.525803	0.782082	0.813911	0.500888	0.408031	0.725281	0.796225	0.322562	0.689046	0.448753	0.641284	0.437684	0.692386	0.247636	0.284483	0.539265	0.268314	0.744329	0.49343	0.412998	0.21952	0.560225	0.602944	0.722963	0.739097	0.154799	0.591703	0.347595	0.2119	0.632097	0.434879	0.59471	0.715591	0.328862	0.802421	0.807829	0.303089	0.440923	0.636063	0.614389	0.513231	0.67568	0.539848	0.604395
cg14063008	0.402208	0.0333664	0.0238104	0.0247848	0.0374239	0.795289	0.0282913	0.027291	0.0280908	0.036219	0.0224389	0.023945	0.0244189	0.8722	0.0269816	0.0406829	0.0294377	0.0257466	0.0216981	0.751402	0.0552539	0.0212244	0.0244861	0.0265833	0.027653	0.162761	0.0270366	0.0279643	0.0238656	0.024344	0.171421	0.0392519	0.021678	0.020588	0.0356074	0.0203648	0.0350232	0.0254534	0.0346906	0.033043	0.0261778	0.0851641	0.0299212	0.643983	0.0586625	0.0285224	0.148809	0.151895	0.0261809
cg18429742	0.665961	0.295347	0.286632	0.335223	0.224641	0.21914	0.53476	0.183181	0.27946	0.314422	0.449363	0.572107	0.463384	0.092235	0.157341	0.117659	0.391975	0.264766	0.31264	0.445015	0.428878	0.252548	0.591611	0.345845	0.0677245	0.630674	0.0988075	0.602276	0.177971	0.122748	0.77371	0.168418	0.477188	0.0929592	0.644073	0.384865	0.869707	0.192848	0.366611	0.245819	0.170617	0.785955	0.177113	0.705803	0.257863	0.384451	0.114316	0.644155	0.233007
cg14037665	0.0889057	0.672976	0.0302497	0.0295406	0.073705	0.480196	0.0392794	0.0232428	0.0358097	0.074016	0.0445457	0.0207256	0.0246564	0.314803	0.0292798	0.041784	0.745372	0.0229058	0.0382806	0.0658269	0.0520442	0.0407414	0.044438	0.0839984	0.0249258	0.0405609	0.0334227	0.0594962	0.0868607	0.610089	0.350675	0.0381604	0.536201	0.0203434	0.0481708	0.047651	0.0619629	0.0192676	0.0944413	0.0370736	0.0231375	0.562699	0.471397	0.0361809	0.0272628	0.0418971	0.0855078	0.167172	0.499267
cg03918304	0.611714	0.710286	0.682777	0.585982	0.648548	0.657905	0.486193	0.18747	0.548706	0.612661	0.622878	0.528103	0.74048	0.684192	0.691987	0.48197	0.676471	0.59871	0.305323	0.555815	0.445665	0.85466	0.604952	0.78233	0.258215	0.512227	0.213396	0.438615	0.502194	0.286721	0.487129	0.858367	0.529131	0.884368	0.629295	0.563807	0.635157	0.594808	0.194064	0.863629	0.64075	0.401503	0.229706	0.217093	0.492017	0.495322	0.512024	0.569397	0.511494
cg03483626	0.706036	0.461976	0.108174	0.177829	0.230812	0.439028	0.502704	0.123952	0.119379	0.552679	0.176914	0.207267	0.102375	0.670305	0.686242	0.420599	0.705878	0.149147	0.7786	0.400426	0.357325	0.213651	0.217492	0.0790773	0.343063	0.282789	0.134349	0.168233	0.0686683	0.524439	0.631267	0.608079	0.216695	0.529657	0.306635	0.777501	0.21151	0.321995	0.161242	0.122142	0.59393	0.403458	0.0618884	0.199137	0.30757	0.0969228	0.0836035	0.394365	0.540658
cg07879977	0.590092	0.287211	0.56412	0.761886	0.83641	0.202749	0.385063	0.558381	0.272637	0.753497	0.485996	0.879269	0.244778	0.757853	0.119623	0.059888	0.844929	0.515305	0.797195	0.774275	0.281294	0.421114	0.292902	0.258574	0.85858	0.606294	0.830827	0.61582	0.282225	0.888652	0.767542	0.142061	0.720255	0.348427	0.11056	0.23746	0.503714	0.902662	0.751539	0.218892	0.671416	0.455647	0.626748	0.49182	0.297925	0.272547	0.736884	0.443781	0.813964
cg06906435	0.742376	0.449163	0.282019	0.790364	0.779306	0.1849	0.859338	0.52599	0.501006	0.71082	0.610942	0.492215	0.538468	0.345742	0.0684606	0.684689	0.375026	0.179459	0.762639	0.481127	0.632448	0.789161	0.465535	0.507556	0.464648	0.797076	0.848273	0.588828	0.737936	0.286235	0.683767	0.634969	0.402627	0.23618	0.546182	0.825763	0.672454	0.866949	0.696449	0.416183	0.241671	0.791104	0.575629	0.630878	0.66393	0.231054	0.75631	0.451045	0.541519
cg00141162	0.586198	0.664567	0.55044	0.778719	0.59941	0.46819	0.846625	0.622878	0.495322	0.564749	0.711743	0.784517	0.777623	0.108033	0.857673	0.51085	0.325805	0.422837	0.666403	0.495538	0.730587	0.483761	0.714615	0.808302	0.207592	0.784695	0.551336	0.309198	0.488768	0.0714914	0.663482	0.880885	0.21059	0.0668416	0.783899	0.748292	0.428762	0.791981	0.731811	0.536804	0.111321	0.735455	0.298972	0.682608	0.848134	0.678179	0.167234	0.736272	0.161065
cg15642035	0.761364	0.584928	0.432322	0.635884	0.155765	0.269597	0.382785	0.663482	0.432923	0.75867	0.283625	0.828487	0.719636	0.164466	0.104819	0.535784	0.296327	0.730511	0.581248	0.648548	0.700795	0.19298	0.71842	0.404587	0.290515	0.520689	0.822442	0.730798	0.305601	0.285113	0.681291	0.764902	0.552009	0.389836	0.613247	0.568266	0.813192	0.887923	0.599114	0.2071	0.176237	0.702144	0.599451	0.351356	0.580739	0.497928	0.416986	0.484707	0.555522
cg25651505	0.192622	0.560225	0.568649	0.376574	0.608848	0.467585	0.555522	0.605429	0.496698	0.335314	0.75022	0.427709	0.468077	0.61737	0.595812	0.450937	0.606608	0.615643	0.637397	0.332252	0.239173	0.62732	0.17718	0.755539	0.69544	0.377402	0.608366	0.174829	0.602366	0.644987	0.140709	0.740698	0.355851	0.77371	0.552935	0.701283	0.534152	0.670124	0.187166	0.808199	0.742304	0.119981	0.467471	0.729055	0.484497	0.612758	0.689693	0.139189	0.544174
cg11376198	0.518437	0.607265	0.74135	0.33683	0.663214	0.641811	0.76216	0.559014	0.334684	0.686567	0.150788	0.422138	0.456827	0.697034	0.570112	0.738723	0.729633	0.201102	0.273282	0.60961	0.309588	0.69544	0.0924527	0.780674	0.271537	0.531987	0.272732	0.301505	0.75377	0.321908	0.356143	0.861537	0.192395	0.195569	0.158611	0.100781	0.570938	0.596119	0.77891	0.678179	0.772122	0.307292	0.730653	0.791684	0.672548	0.276371	0.784079	0.444706	0.262735
cg03100752	0.580949	0.255053	0.794995	0.313842	0.336639	0.422598	0.300261	0.403867	0.427602	0.655568	0.418202	0.128084	0.31433	0.641006	0.765411	0.0587467	0.308346	0.292536	0.498651	0.558085	0.377089	0.302594	0.556588	0.286632	0.102812	0.396598	0.232937	0.661629	0.914988	0.372718	0.427398	0.551438	0.551642	0.252105	0.046458	0.317169	0.387553	0.248326	0.251667	0.364476	0.24739	0.332052	0.154861	0.41688	0.286045	0.44367	0.914988	0.374727	0.0524391
cg01785568	0.853806	0.294134	0.770001	0.890184	0.706506	0.776945	0.681291	0.844929	0.583243	0.609914	0.847965	0.583729	0.898997	0.0838843	0.503415	0.933631	0.67335	0.873374	0.797563	0.733139	0.469126	0.825244	0.507457	0.674821	0.942384	0.814367	0.84515	0.744049	0.509918	0.125457	0.868462	0.811317	0.240988	0.175291	0.737499	0.763402	0.666829	0.865641	0.808835	0.892199	0.440097	0.902537	0.836819	0.867433	0.678261	0.747293	0.927609	0.489716	0.324842
cg06394229	0.672711	0.758941	0.837548	0.599682	0.872284	0.192475	0.763207	0.813044	0.780608	0.542149	0.280392	0.11206	0.409527	0.87988	0.929026	0.430806	0.652681	0.850685	0.403976	0.722468	0.709207	0.762577	0.783652	0.878032	0.694194	0.666313	0.883152	0.809042	0.909768	0.862126	0.42471	0.643619	0.673941	0.245472	0.794021	0.717648	0.799976	0.720557	0.69864	0.863957	0.91416	0.57251	0.133933	0.853973	0.84458	0.681291	0.862316	0.301421	0.758941
cg13397379	0.761112	0.514568	0.496204	0.858797	0.881168	0.154273	0.840602	0.84409	0.236615	0.883227	0.494974	0.894086	0.49022	0.167116	0.251414	0.903855	0.509522	0.52537	0.87299	0.700311	0.501971	0.155343	0.822899	0.367348	0.74597	0.696951	0.583243	0.775463	0.810389	0.781614	0.809952	0.878948	0.877949	0.408889	0.416363	0.810219	0.888491	0.698074	0.74597	0.478412	0.107377	0.730653	0.807619	0.672208	0.788933	0.639716	0.504206	0.465432	0.867225
cg14925024	0.407349	0.558381	0.376988	0.748789	0.401709	0.775087	0.830343	0.263372	0.570525	0.47006	0.677074	0.731664	0.494658	0.64881	0.757514	0.517373	0.713781	0.520872	0.514873	0.34003	0.594507	0.7798	0.567666	0.344834	0.707468	0.390855	0.29667	0.596411	0.253521	0.354572	0.391875	0.868545	0.698001	0.781679	0.706803	0.639169	0.479143	0.846625	0.453179	0.204798	0.332538	0.524949	0.888844	0.392718	0.338318	0.512227	0.145636	0.736195	0.124628
cg07903918	0.303868	0.647814	0.0347956	0.0637997	0.17042	0.710898	0.163122	0.0354456	0.277764	0.11023	0.473804	0.456293	0.176649	0.131621	0.779109	0.20853	0.521177	0.0493275	0.0819049	0.117943	0.0717382	0.850216	0.046442	0.0432016	0.0665799	0.0411353	0.0478076	0.0643004	0.168732	0.594306	0.365017	0.114087	0.110195	0.110449	0.448048	0.031952	0.0996971	0.399919	0.34987	0.148639	0.908675	0.0455519	0.296021	0.06285	0.113743	0.0463572	0.0814128	0.129835	0.656812
cg06653796	0.522732	0.667838	0.19745	0.120402	0.441877	0.768469	0.190004	0.112327	0.0926108	0.317435	0.13502	0.112879	0.256835	0.861836	0.549104	0.0931873	0.242668	0.123313	0.254675	0.687073	0.237804	0.138278	0.120238	0.153954	0.188104	0.53476	0.0599243	0.494367	0.607799	0.850216	0.334082	0.105702	0.563704	0.139545	0.134256	0.156842	0.0998543	0.073092	0.193277	0.560422	0.892571	0.365924	0.305026	0.384451	0.306821	0.205889	0.771443	0.472752	0.801978
cg24867501	0.832387	0.753913	0.812307	0.381633	0.667328	0.438091	0.779487	0.603594	0.726857	0.60961	0.659997	0.856761	0.623353	0.0920964	0.923986	0.743617	0.51097	0.885765	0.679477	0.481439	0.711294	0.457432	0.370835	0.492635	0.695358	0.668743	0.864811	0.667838	0.85223	0.259015	0.661361	0.275356	0.532613	0.684858	0.686495	0.816126	0.844843	0.88004	0.784079	0.625591	0.521511	0.728623	0.648716	0.920544	0.857942	0.730722	0.835933	0.671952	0.861498
cg07897701	0.766567	0.524234	0.556109	0.270531	0.210055	0.240821	0.387856	0.682437	0.465143	0.628443	0.229295	0.574933	0.485452	0.136789	0.145843	0.033583	0.162068	0.647814	0.592188	0.84658	0.561578	0.347177	0.309866	0.462377	0.460125	0.835187	0.698001	0.73917	0.402436	0.73917	0.588828	0.233417	0.226393	0.241671	0.415142	0.457153	0.299876	0.142522	0.159144	0.752626	0.428661	0.608553	0.273196	0.285207	0.555998	0.281926	0.944896	0.641458	0.913817
cg24092914	0.741281	0.460727	0.196402	0.805993	0.835139	0.516752	0.658546	0.273196	0.673517	0.719636	0.772447	0.8585	0.744117	0.341036	0.761112	0.548308	0.340844	0.80862	0.507965	0.288884	0.769936	0.488768	0.47006	0.593221	0.187749	0.824952	0.739372	0.734304	0.217254	0.823711	0.721378	0.344834	0.189945	0.114145	0.620165	0.339528	0.611714	0.843133	0.250718	0.120659	0.263105	0.816235	0.48123	0.443019	0.573106	0.781025	0.828865	0.318237	0.437585
cg22377389	0.278142	0.233848	0.836689	0.919955	0.75364	0.609721	0.914112	0.876552	0.59492	0.794995	0.788286	0.920544	0.709916	0.812465	0.916294	0.917791	0.55044	0.0682523	0.682851	0.296576	0.858623	0.887238	0.810949	0.853402	0.687985	0.679987	0.796037	0.171483	0.581973	0.242142	0.261136	0.949049	0.0440527	0.612578	0.754448	0.885733	0.745029	0.855308	0.82442	0.806588	0.179858	0.255781	0.752198	0.813758	0.866015	0.78085	0.635249	0.35813	0.822992
cg17483510	0.191581	0.0253455	0.0312138	0.123447	0.0258664	0.273282	0.604097	0.0798319	0.0410668	0.215743	0.0576967	0.484291	0.0636266	0.0796281	0.237545	0.0821523	0.0581814	0.0341186	0.0440864	0.0548308	0.140152	0.398148	0.117823	0.158894	0.134163	0.036205	0.163185	0.0591337	0.137757	0.455868	0.179928	0.417083	0.0258844	0.48918	0.455132	0.465843	0.330114	0.471811	0.0354319	0.0899177	0.0252633	0.0607993	0.0918803	0.0763001	0.278707	0.163244	0.530074	0.107829	0.102408
cg09272256	0.494974	0.892772	0.614686	0.883033	0.851773	0.346254	0.779859	0.745372	0.349375	0.528505	0.79672	0.854826	0.842217	0.718116	0.848993	0.595521	0.660818	0.604395	0.93431	0.810002	0.801088	0.199358	0.66243	0.633021	0.428762	0.852716	0.588719	0.403144	0.42471	0.422598	0.567349	0.475014	0.839951	0.35242	0.730955	0.643536	0.800363	0.205282	0.869032	0.294134	0.398973	0.7556	0.764265	0.823116	0.524234	0.681526	0.730955	0.368467	0.272369
cg18511007	0.316683	0.052769	0.0454386	0.0233329	0.320119	0.265643	0.382583	0.485241	0.058365	0.0921452	0.0362428	0.416183	0.152732	0.0256659	0.0564436	0.022736	0.0358144	0.0263575	0.673941	0.204382	0.187971	0.0302274	0.0423397	0.0548515	0.341036	0.0339018	0.0390056	0.1202	0.0380989	0.016971	0.48039	0.0982871	0.0583164	0.0159671	0.0403732	0.529023	0.0669925	0.0376815	0.0387473	0.0395571	0.0146649	0.354957	0.0252517	0.0262765	0.0261778	0.0316825	0.742176	0.0985954	0.0335998
cg24130010	0.449786	0.270885	0.0908013	0.0821049	0.145843	0.575722	0.122451	0.100022	0.202604	0.445015	0.109522	0.0597294	0.134731	0.272637	0.757661	0.0926385	0.843503	0.0805629	0.0925325	0.189875	0.114316	0.0670958	0.122277	0.166156	0.108705	0.0589168	0.16572	0.134592	0.081502	0.0443395	0.628081	0.0656934	0.0656265	0.579526	0.114235	0.0895075	0.135551	0.109018	0.113197	0.0948819	0.0916656	0.603044	0.522379	0.0868607	0.0858087	0.188104	0.095552	0.528005	0.0632983
cg07621046	0.525477	0.222389	0.294228	0.0782172	0.214347	0.133839	0.0635871	0.15751	0.256479	0.191366	0.560953	0.484391	0.300834	0.0871604	0.0559252	0.043029	0.653036	0.0573089	0.11251	0.546487	0.274135	0.5636	0.18078	0.188741	0.0250734	0.0998543	0.278707	0.256835	0.181133	0.219927	0.146604	0.0825179	0.12185	0.0436507	0.205282	0.178121	0.234446	0.0765753	0.254961	0.658371	0.0751019	0.604867	0.418906	0.681693	0.110999	0.240558	0.536102	0.25964	0.568742
cg21992250	0.282704	0.647725	0.561794	0.0947403	0.151022	0.532729	0.178053	0.23218	0.151944	0.486705	0.188104	0.689939	0.314622	0.524439	0.112739	0.0839984	0.299348	0.0470071	0.0923161	0.523242	0.270885	0.191146	0.193702	0.184288	0.234538	0.234446	0.135352	0.393332	0.30692	0.649939	0.386194	0.381007	0.532197	0.380085	0.127391	0.0706092	0.198759	0.736766	0.108484	0.228346	0.724105	0.659254	0.498249	0.15703	0.553347	0.143776	0.73917	0.213231	0.648178
cg17950095	0.417186	0.112879	0.677666	0.526593	0.429183	0.376275	0.713222	0.132009	0.107442	0.177627	0.679016	0.74939	0.232507	0.0483865	0.782507	0.772887	0.201844	0.310052	0.160238	0.301212	0.455132	0.518969	0.524118	0.311678	0.173693	0.384744	0.305026	0.0989902	0.101259	0.830873	0.248682	0.507556	0.081594	0.105493	0.326209	0.369515	0.0829644	0.517067	0.0724354	0.698001	0.0390006	0.653395	0.386194	0.106238	0.612287	0.232102	0.50713	0.122097	0.122534
cg17560332	0.46167	0.481548	0.11475	0.0458214	0.0836518	0.565364	0.168418	0.0836755	0.196617	0.508581	0.218165	0.365421	0.546487	0.639716	0.60399	0.0944728	0.570734	0.111219	0.118847	0.363962	0.291862	0.374224	0.518657	0.213965	0.0711334	0.16805	0.0867653	0.229295	0.474804	0.42596	0.288204	0.288304	0.502516	0.759796	0.253784	0.110922	0.193136	0.433946	0.0370547	0.548612	0.812257	0.368893	0.438416	0.0487451	0.189589	0.0473799	0.12435	0.261843	0.562097
cg05436658	0.0337947	0.568742	0.0332665	0.10724	0.0175734	0.175092	0.0325597	0.0289013	0.0461975	0.28633	0.115047	0.227878	0.133979	0.029684	0.579428	0.0187517	0.157991	0.620635	0.054668	0.248963	0.0768888	0.828344	0.0170566	0.0990528	0.0460892	0.0758417	0.0295065	0.0361111	0.684192	0.414726	0.0316983	0.0543907	0.0365324	0.0164426	0.0266861	0.0166576	0.0233146	0.152465	0.0186066	0.0751374	0.833556	0.331677	0.104537	0.0161389	0.076556	0.0249114	0.032588	0.0458148	0.578629
cg27132814	0.436511	0.370926	0.838694	0.70635	0.787461	0.254045	0.578145	0.700552	0.46207	0.364367	0.402526	0.650026	0.736694	0.397398	0.171421	0.595271	0.283718	0.82621	0.764778	0.578145	0.443456	0.777439	0.642346	0.43333	0.686333	0.680416	0.819257	0.671248	0.768802	0.494465	0.33993	0.309782	0.464319	0.225246	0.706434	0.82442	0.633221	0.650318	0.714467	0.348427	0.799867	0.596023	0.529961	0.692067	0.708481	0.841253	0.878239	0.312531	0.293941
cg20676475	0.846713	0.401819	0.273391	0.232758	0.538247	0.188679	0.693041	0.769489	0.344723	0.864857	0.372601	0.457654	0.544467	0.635884	0.15751	0.245895	0.483761	0.484497	0.562197	0.694194	0.382172	0.160537	0.386828	0.352802	0.459916	0.717103	0.70295	0.759147	0.49846	0.140456	0.821325	0.379535	0.578544	0.266165	0.268224	0.539449	0.598606	0.360691	0.35764	0.203437	0.1616	0.847196	0.288204	0.269417	0.7997	0.448753	0.471601	0.446738	0.247055
cg02569613	0.277668	0.0884442	0.0400283	0.0957835	0.08888	0.326006	0.605711	0.078071	0.142922	0.207669	0.399376	0.172289	0.0774809	0.120156	0.109018	0.100943	0.470158	0.0686364	0.264486	0.0499112	0.141275	0.773265	0.0924274	0.0608371	0.0413981	0.0468161	0.0905355	0.0639665	0.797291	0.578346	0.393633	0.0781536	0.0470977	0.813401	0.0862786	0.0759919	0.0926627	0.0584225	0.0649114	0.115726	0.41935	0.170357	0.028519	0.125501	0.061608	0.197871	0.042557	0.0942986	0.81386
cg14456683	0.339528	0.477798	0.42596	0.751402	0.739372	0.263754	0.572309	0.611421	0.672626	0.399919	0.770778	0.618412	0.27758	0.514873	0.635157	0.917928	0.443126	0.600157	0.781897	0.294983	0.368579	0.561474	0.704175	0.270885	0.0742268	0.341246	0.507457	0.329212	0.165291	0.697034	0.407146	0.773401	0.267426	0.573818	0.461055	0.729277	0.257593	0.863111	0.70817	0.793676	0.757448	0.342862	0.791805	0.582924	0.555615	0.295347	0.747363	0.624964	0.124387
cg17872757	0.0430931	0.180315	0.0322403	0.0418015	0.0285586	0.752422	0.0406183	0.0354097	0.0402798	0.0164861	0.193421	0.0239803	0.0186612	0.0754747	0.0608749	0.0262979	0.935309	0.0340451	0.0478515	0.0670067	0.0218957	0.0374686	0.014712	0.0215339	0.0155753	0.0340473	0.0409445	0.0392084	0.0167104	0.0510977	0.145636	0.149644	0.464538	0.228419	0.0264812	0.014537	0.0299561	0.0253263	0.0265356	0.661887	0.794304	0.0498933	0.0369803	0.0531655	0.0161346	0.086635	0.0873381	0.0305805	0.0392736
cg09440340	0.183534	0.198981	0.320316	0.429677	0.703783	0.215977	0.715899	0.60095	0.594122	0.24504	0.396806	0.494257	0.351933	0.108522	0.0897759	0.555615	0.167795	0.435481	0.570112	0.215516	0.645733	0.27007	0.412246	0.247552	0.028483	0.3623	0.473916	0.375748	0.31452	0.0316008	0.135854	0.422725	0.3831	0.0637867	0.604493	0.446091	0.485013	0.207024	0.590994	0.23259	0.0847279	0.0835607	0.320508	0.596303	0.399811	0.543462	0.0492318	0.122658	0.105596
cg02067021	0.509827	0.471307	0.890568	0.870188	0.75035	0.733289	0.923221	0.801424	0.486813	0.462168	0.498843	0.703047	0.742725	0.921958	0.401919	0.607458	0.582528	0.316683	0.790932	0.868304	0.853402	0.732915	0.853495	0.799755	0.479972	0.736624	0.837011	0.737015	0.917071	0.120278	0.426154	0.701437	0.715134	0.223792	0.917209	0.324749	0.827156	0.402436	0.664192	0.409092	0.21849	0.637772	0.471489	0.518657	0.543675	0.69815	0.466551	0.552213	0.333017
cg04505023	0.672029	0.416272	0.442099	0.35418	0.448143	0.185312	0.602768	0.61373	0.287927	0.580637	0.356716	0.328815	0.804804	0.539848	0.111648	0.0736139	0.254574	0.56115	0.536614	0.708555	0.506524	0.253247	0.314125	0.274896	0.349168	0.721846	0.354957	0.688067	0.340931	0.339317	0.758791	0.185818	0.492429	0.20853	0.308156	0.488484	0.681864	0.199648	0.49182	0.275449	0.148571	0.691571	0.568467	0.218564	0.645733	0.30624	0.475728	0.289446	0.792036
cg08749917	0.723867	0.344325	0.849482	0.368376	0.567042	0.55044	0.879481	0.285387	0.297729	0.762504	0.261666	0.326689	0.408456	0.870188	0.885929	0.417714	0.703307	0.695109	0.262654	0.707784	0.393517	0.284076	0.433534	0.285491	0.284723	0.497501	0.233757	0.582163	0.307676	0.4427	0.670471	0.331859	0.443982	0.166277	0.349065	0.359648	0.390446	0.70039	0.344229	0.24125	0.190418	0.711902	0.18382	0.479652	0.279638	0.339528	0.249674	0.771793	0.289155
cg05661838	0.066533	0.152963	0.567769	0.615643	0.659997	0.242324	0.59471	0.326413	0.195885	0.244868	0.665621	0.589312	0.561474	0.26785	0.517163	0.622025	0.482179	0.0453731	0.61314	0.133691	0.395877	0.689215	0.278051	0.444394	0.539556	0.384654	0.0961681	0.146159	0.561264	0.354366	0.23153	0.793453	0.233757	0.549513	0.604097	0.657181	0.572708	0.447757	0.0545278	0.439437	0.382785	0.228507	0.565364	0.354572	0.589312	0.412141	0.666223	0.341136	0.460834
cg05767404	0.548706	0.190418	0.297632	0.399376	0.730511	0.0911771	0.509312	0.486193	0.171352	0.618023	0.134349	0.554267	0.631177	0.115408	0.0911493	0.554596	0.141074	0.508075	0.621932	0.300635	0.56565	0.10724	0.555998	0.255053	0.404169	0.626074	0.622676	0.536201	0.554267	0.625401	0.741198	0.625505	0.383424	0.380294	0.345138	0.633945	0.61314	0.255862	0.464735	0.308346	0.109557	0.544174	0.439749	0.389958	0.437784	0.234538	0.361097	0.350065	0.831053
cg08441806	0.213322	0.628349	0.638784	0.10052	0.483446	0.559227	0.151509	0.359762	0.276846	0.108775	0.452255	0.636832	0.617186	0.487331	0.604097	0.853537	0.743282	0.0387623	0.378796	0.599026	0.184836	0.743617	0.320119	0.378701	0.0395571	0.25831	0.304541	0.29459	0.700879	0.624677	0.105231	0.483863	0.525803	0.767482	0.465843	0.153573	0.204299	0.250475	0.580442	0.622676	0.789223	0.1613	0.33148	0.439133	0.364476	0.325606	0.149147	0.328	0.543173
cg08578641	0.246963	0.290242	0.260281	0.228507	0.440809	0.708414	0.310837	0.195264	0.487228	0.312333	0.250389	0.417414	0.173693	0.694943	0.674821	0.275261	0.803586	0.163962	0.226315	0.28701	0.237032	0.751333	0.272461	0.248057	0.0828226	0.171143	0.246425	0.393829	0.299067	0.392621	0.227405	0.577766	0.582924	0.695846	0.48779	0.33283	0.431242	0.224319	0.386934	0.324346	0.817086	0.125319	0.45576	0.330697	0.457851	0.316979	0.332538	0.186443	0.37606
cg15464148	0.647258	0.617454	0.471397	0.222645	0.732465	0.531131	0.643536	0.414837	0.403144	0.690818	0.336924	0.24789	0.706803	0.121499	0.89332	0.45063	0.310265	0.352522	0.884607	0.720021	0.419449	0.554691	0.26751	0.305788	0.231054	0.680675	0.569508	0.643352	0.408255	0.276097	0.618124	0.252823	0.87434	0.16634	0.715744	0.732692	0.550215	0.12241	0.292249	0.40294	0.410302	0.518869	0.177562	0.519666	0.651513	0.784825	0.801534	0.462787	0.765846
cg10175795	0.310359	0.372198	0.119748	0.0964957	0.139495	0.438205	0.426352	0.499981	0.33903	0.186516	0.689134	0.590797	0.140356	0.476976	0.560319	0.247479	0.675164	0.525895	0.630311	0.303281	0.225581	0.675423	0.634402	0.148408	0.522379	0.120574	0.361979	0.195413	0.657544	0.609996	0.457851	0.131335	0.136943	0.812257	0.258846	0.129233	0.187971	0.190572	0.188816	0.0803068	0.753848	0.384347	0.575816	0.161719	0.403346	0.0797292	0.0542101	0.420497	0.506244
cg02028524	0.6067	0.90164	0.566343	0.838345	0.466341	0.85466	0.803011	0.347392	0.631532	0.553554	0.595221	0.67568	0.91067	0.231611	0.232102	0.513854	0.5043	0.624964	0.544977	0.696864	0.830488	0.653576	0.738582	0.666403	0.187325	0.853713	0.258933	0.876877	0.611235	0.149382	0.649857	0.576333	0.767281	0.228346	0.571537	0.805301	0.77726	0.557325	0.527509	0.409853	0.352025	0.625401	0.588055	0.412032	0.501119	0.506244	0.537517	0.397182	0.346156
cg25033144	0.897523	0.878792	0.374126	0.926352	0.703536	0.834476	0.469846	0.313047	0.802421	0.724269	0.645267	0.827891	0.868219	0.485996	0.692232	0.362912	0.602559	0.704821	0.908975	0.770967	0.845594	0.570938	0.715591	0.540877	0.73917	0.794871	0.317169	0.819768	0.465432	0.50381	0.905208	0.502996	0.772181	0.842589	0.520473	0.364594	0.714467	0.832056	0.495538	0.320119	0.413615	0.793676	0.698936	0.593221	0.482701	0.641371	0.168992	0.54046	0.873246
cg20616414	0.0358834	0.0735092	0.0363563	0.0227128	0.0331792	0.706904	0.0296944	0.101818	0.153678	0.145786	0.0975732	0.191295	0.441877	0.723259	0.813192	0.0314027	0.671159	0.0259504	0.0428635	0.637219	0.0931873	0.0221837	0.130165	0.0614808	0.279191	0.0697324	0.174486	0.0982871	0.0600339	0.277227	0.72835	0.0718621	0.033047	0.0165771	0.262832	0.0276557	0.0434321	0.312951	0.0470071	0.0308609	0.163122	0.0745164	0.254574	0.050761	0.1478	0.0758979	0.0365554	0.198253	0.739788
cg11617144	0.822591	0.963655	0.987446	0.396598	0.964894	0.609996	0.97188	0.94684	0.957703	0.805829	0.748366	0.644712	0.667	0.524534	0.993232	0.340728	0.844132	0.961784	0.758861	0.934729	0.572409	0.71432	0.781959	0.74135	0.903609	0.883677	0.986657	0.973478	0.988704	0.972999	0.705551	0.425247	0.987835	0.458579	0.870823	0.631177	0.984215	0.985768	0.668206	0.897979	0.587565	0.95268	0.668554	0.994456	0.62703	0.982148	0.945818	0.779547	0.979826
cg16743289	0.469019	0.584523	0.770653	0.362703	0.791391	0.171207	0.676653	0.570636	0.801201	0.446091	0.54408	0.720857	0.279191	0.229617	0.527799	0.928819	0.748366	0.51446	0.460125	0.355565	0.51759	0.761188	0.592846	0.521606	0.802146	0.526407	0.76013	0.394365	0.876475	0.842719	0.319163	0.273847	0.707068	0.387553	0.772311	0.756444	0.672891	0.750895	0.640663	0.3278	0.908379	0.27201	0.749884	0.820974	0.279819	0.743222	0.858672	0.281476	0.835933
cg17907567	0.723108	0.416673	0.725429	0.864	0.885609	0.400934	0.634778	0.59393	0.834279	0.438416	0.287302	0.866864	0.907564	0.926121	0.679187	0.560319	0.153406	0.694785	0.770838	0.627622	0.82264	0.92223	0.710286	0.478211	0.966438	0.839097	0.917699	0.468803	0.793858	0.233087	0.89102	0.91296	0.417714	0.267683	0.839543	0.876268	0.729484	0.508581	0.665346	0.833652	0.351257	0.59931	0.709681	0.762096	0.88784	0.853589	0.828391	0.354275	0.486813
cg18992688	0.269318	0.301121	0.1234	0.472862	0.0898063	0.583444	0.724405	0.518334	0.658722	0.104119	0.0642445	0.419994	0.173954	0.0322248	0.38528	0.827661	0.223326	0.424821	0.48061	0.127253	0.41432	0.465843	0.480087	0.479343	0.360875	0.327007	0.230489	0.100655	0.237632	0.0549798	0.130921	0.788512	0.232507	0.467471	0.779242	0.682519	0.572309	0.359158	0.0889057	0.394574	0.0532029	0.097311	0.584829	0.757195	0.153179	0.130352	0.15335	0.151286	0.0969527
cg19562969	0.690818	0.31905	0.232758	0.787699	0.593821	0.152412	0.667	0.326006	0.311279	0.483863	0.249414	0.653576	0.648088	0.144578	0.372718	0.342862	0.125947	0.600561	0.667	0.360385	0.506735	0.430185	0.325805	0.288014	0.145131	0.632654	0.294983	0.632654	0.318957	0.231929	0.698787	0.770458	0.319925	0.20329	0.347595	0.269501	0.391363	0.376574	0.317855	0.198696	0.676471	0.560422	0.269597	0.307872	0.355565	0.445446	0.645267	0.584829	0.511722
cg06793062	0.701915	0.501006	0.440923	0.467784	0.334082	0.268411	0.544174	0.597443	0.515398	0.794482	0.387659	0.91024	0.767746	0.104888	0.501559	0.113481	0.869195	0.323034	0.632838	0.691395	0.659619	0.164915	0.398585	0.613047	0.442601	0.732536	0.345238	0.827202	0.3623	0.573712	0.615643	0.731811	0.873072	0.264766	0.422365	0.24538	0.746932	0.305601	0.47058	0.566641	0.913817	0.82666	0.49846	0.384654	0.438714	0.543977	0.36671	0.559227	0.888409
cg07867360	0.736823	0.854996	0.651857	0.43113	0.709681	0.90052	0.381114	0.475219	0.795649	0.757724	0.656721	0.384552	0.435888	0.955763	0.894122	0.299707	0.683349	0.466245	0.338416	0.878431	0.477188	0.599207	0.597906	0.475219	0.885142	0.538568	0.400934	0.646473	0.498145	0.896136	0.790585	0.55951	0.838785	0.270335	0.688228	0.505725	0.668206	0.508475	0.582163	0.740907	0.954378	0.829361	0.499046	0.456508	0.87119	0.631074	0.714097	0.733602	0.927361
cg20080624	0.79266	0.256656	0.638883	0.274507	0.158431	0.628081	0.356427	0.271919	0.43748	0.591799	0.498035	0.516541	0.441341	0.270161	0.138025	0.897316	0.351257	0.220821	0.588528	0.602857	0.399695	0.839141	0.358652	0.432322	0.636545	0.628634	0.214657	0.401264	0.583347	0.16307	0.638229	0.43632	0.151182	0.123904	0.428969	0.284257	0.16384	0.840846	0.229056	0.873457	0.248491	0.707068	0.476143	0.444394	0.370835	0.371553	0.719096	0.625792	0.318237
cg07773116	0.211743	0.193634	0.393332	0.141904	0.340931	0.601724	0.233671	0.0881978	0.372396	0.0890394	0.522624	0.459297	0.17281	0.45063	0.351641	0.0488458	0.767224	0.0766335	0.601527	0.132771	0.258215	0.659812	0.132009	0.181551	0.2083	0.26923	0.443126	0.155461	0.183395	0.505424	0.470367	0.689215	0.27517	0.0999072	0.207428	0.54387	0.319163	0.407253	0.0865384	0.607067	0.804095	0.113159	0.424821	0.170485	0.554788	0.0701447	0.268224	0.667	0.456406
cg13603171	0.554788	0.148188	0.650782	0.292249	0.598005	0.160537	0.646108	0.16879	0.141019	0.647528	0.377983	0.342673	0.627526	0.789635	0.555308	0.710133	0.160537	0.295258	0.406518	0.42141	0.317077	0.238833	0.718345	0.255159	0.134491	0.440923	0.12858	0.159257	0.145786	0.932593	0.762504	0.361298	0.101549	0.837112	0.447541	0.500888	0.648088	0.528312	0.168179	0.245729	0.199498	0.148362	0.207176	0.128262	0.761309	0.179787	0.571537	0.20283	0.685823
cg13181019	0.86329	0.417714	0.322754	0.172926	0.410076	0.819503	0.475219	0.435585	0.749954	0.850819	0.351832	0.385481	0.798611	0.125994	0.406518	0.310359	0.344834	0.848674	0.32246	0.697034	0.353227	0.250208	0.426154	0.467888	0.552213	0.693784	0.296968	0.788286	0.315703	0.279007	0.873157	0.301121	0.48764	0.298126	0.366925	0.337331	0.462681	0.285785	0.333111	0.460834	0.222049	0.868135	0.291862	0.503615	0.353019	0.513533	0.843133	0.853235	0.343063
cg14550066	0.750951	0.516117	0.371144	0.357325	0.718882	0.593429	0.827417	0.773004	0.759405	0.75187	0.641284	0.676471	0.533475	0.23927	0.425541	0.46167	0.452345	0.230578	0.859978	0.580538	0.259015	0.543067	0.278418	0.605903	0.506626	0.45114	0.681693	0.468077	0.409637	0.840846	0.773896	0.719636	0.35955	0.862736	0.716298	0.691747	0.766567	0.815603	0.623056	0.676285	0.122577	0.712135	0.539848	0.637865	0.74597	0.829454	0.744742	0.54408	0.777317
cg05445326	0.908288	0.728699	0.261219	0.779487	0.852584	0.900439	0.880352	0.342762	0.495817	0.77628	0.910032	0.908975	0.895931	0.920038	0.686826	0.575629	0.625045	0.846786	0.919136	0.734155	0.502516	0.737786	0.290341	0.543173	0.79643	0.892199	0.80475	0.829015	0.541206	0.910763	0.719804	0.439028	0.667249	0.435678	0.720407	0.813347	0.637865	0.598111	0.402834	0.573504	0.945759	0.791571	0.640386	0.200335	0.476345	0.432621	0.858406	0.491406	0.930081
cg04740359	0.23259	0.237115	0.255517	0.53081	0.398148	0.445341	0.59393	0.703143	0.347496	0.312531	0.162946	0.651595	0.332538	0.733215	0.501119	0.788059	0.21952	0.218963	0.41101	0.173413	0.576232	0.504001	0.749137	0.417513	0.550621	0.216845	0.664889	0.307776	0.810656	0.145292	0.315396	0.751078	0.399919	0.257688	0.332638	0.802367	0.592846	0.830199	0.826163	0.718564	0.0700245	0.343063	0.785827	0.761953	0.629933	0.744613	0.739652	0.478646	0.244051
cg14425294	0.310161	0.148639	0.40294	0.712434	0.526407	0.378889	0.759077	0.689134	0.250806	0.474804	0.468693	0.745311	0.465337	0.324244	0.0612274	0.512227	0.0568114	0.407349	0.576536	0.228974	0.606789	0.67568	0.429183	0.297825	0.567243	0.507556	0.651513	0.139143	0.615262	0.253604	0.138224	0.677998	0.0823802	0.052769	0.740338	0.640386	0.323643	0.323348	0.391134	0.433231	0.217414	0.409197	0.246425	0.579952	0.616899	0.657445	0.17905	0.350974	0.596023
cg04096767	0.818849	0.739991	0.751806	0.380492	0.224237	0.758058	0.314896	0.675854	0.319361	0.77395	0.635437	0.266361	0.480196	0.779109	0.436892	0.330011	0.845998	0.488484	0.434058	0.692809	0.43333	0.274408	0.449063	0.840892	0.897438	0.498249	0.621153	0.349671	0.445229	0.902953	0.773462	0.668381	0.56115	0.91694	0.36078	0.434058	0.355368	0.764838	0.293359	0.760513	0.911513	0.763272	0.599114	0.410511	0.432322	0.595521	0.802421	0.684689	0.871606
cg01988129	0.110469	0.0874142	0.794752	0.0836755	0.236776	0.048672	0.0579918	0.126597	0.25629	0.102114	0.108063	0.0659713	0.103758	0.073092	0.505927	0.185671	0.892151	0.105028	0.137247	0.6569	0.08157	0.0502474	0.181421	0.310532	0.0593221	0.0541901	0.15044	0.0972802	0.0937902	0.122703	0.639272	0.163122	0.0736506	0.071353	0.397813	0.0936981	0.176378	0.112843	0.179117	0.403458	0.0590009	0.0726142	0.637963	0.0662815	0.079255	0.231696	0.191871	0.15697	0.118933
cg08369065	0.0426187	0.606878	0.181421	0.0750233	0.348634	0.290341	0.0481631	0.0760101	0.625222	0.0571716	0.641371	0.279191	0.0863676	0.620536	0.613336	0.635333	0.758861	0.03995	0.515305	0.358038	0.205021	0.0275555	0.342343	0.494974	0.436102	0.122054	0.0539014	0.085576	0.072772	0.63164	0.0386057	0.55044	0.402526	0.742376	0.0539929	0.0377506	0.117462	0.409092	0.125901	0.429978	0.578629	0.0368356	0.660363	0.380085	0.0545886	0.344509	0.157809	0.048672	0.601724
cg10734665	0.609914	0.644712	0.489597	0.278331	0.216465	0.649163	0.64327	0.405701	0.300736	0.370553	0.497409	0.319826	0.300736	0.829361	0.140655	0.467784	0.811005	0.162632	0.173144	0.379872	0.275748	0.67612	0.16925	0.68342	0.321812	0.532729	0.731517	0.207998	0.656543	0.2112	0.714023	0.502516	0.475829	0.649857	0.639716	0.483344	0.412588	0.225074	0.275748	0.381308	0.563494	0.694785	0.673065	0.544174	0.827845	0.347177	0.847414	0.749064	0.596207
cg00187686	0.408255	0.333518	0.397286	0.512537	0.682099	0.144739	0.740266	0.674183	0.345342	0.383217	0.416986	0.719096	0.680938	0.166474	0.141275	0.396495	0.390158	0.466551	0.757195	0.612287	0.3831	0.238309	0.442302	0.335556	0.495768	0.681204	0.580147	0.537827	0.196104	0.378701	0.423776	0.499152	0.313544	0.58392	0.618782	0.196768	0.675854	0.250306	0.481754	0.126556	0.381848	0.819257	0.553347	0.245199	0.629652	0.225074	0.23927	0.497177	0.706904
cg17003970	0.846829	0.8878	0.908471	0.884218	0.640564	0.865559	0.871398	0.913817	0.910032	0.271262	0.931716	0.351452	0.879395	0.880508	0.886084	0.940841	0.865477	0.845022	0.879561	0.830679	0.431897	0.892494	0.874223	0.911166	0.862577	0.848499	0.42471	0.909217	0.908975	0.88008	0.326505	0.915745	0.0300489	0.884528	0.640119	0.914338	0.916628	0.885929	0.946345	0.931239	0.914598	0.893006	0.911813	0.918055	0.235654	0.768674	0.911022	0.869903	0.891704
cg00514407	0.144683	0.0416591	0.0489211	0.7798	0.0721811	0.0467586	0.410904	0.0504481	0.078908	0.0871835	0.0573853	0.851215	0.713149	0.751142	0.759465	0.0303572	0.0604642	0.0839062	0.0723111	0.0606246	0.433946	0.215128	0.251155	0.108705	0.0266669	0.264401	0.0371692	0.237711	0.0197727	0.040718	0.106885	0.760846	0.0219177	0.0864895	0.455231	0.198759	0.0699219	0.0623318	0.0451261	0.0551328	0.0344903	0.0498363	0.0374785	0.0750233	0.310928	0.207916	0.0703226	0.0613158	0.0600951
cg13993218	0.697599	0.333697	0.585982	0.645827	0.402017	0.452551	0.758791	0.543268	0.741709	0.835607	0.381734	0.777558	0.684689	0.647898	0.456508	0.577766	0.225669	0.881694	0.69925	0.712684	0.687309	0.787409	0.667749	0.689939	0.768153	0.767878	0.877778	0.446091	0.682178	0.343447	0.432831	0.763527	0.488587	0.19745	0.644887	0.779605	0.497409	0.435186	0.551642	0.75187	0.373668	0.713302	0.466245	0.482496	0.882626	0.681781	0.830583	0.495432	0.848407
cg03365437	0.0908301	0.0928771	0.508173	0.0626538	0.270702	0.297729	0.0970388	0.0665938	0.121032	0.175366	0.149611	0.0770274	0.152789	0.548508	0.61458	0.142111	0.35845	0.605429	0.0690699	0.110301	0.117943	0.635798	0.150106	0.356821	0.0654319	0.154204	0.134592	0.152732	0.133175	0.703047	0.24125	0.198464	0.065958	0.683509	0.0929849	0.0875384	0.12279	0.139789	0.0753626	0.0930777	0.803819	0.4961	0.374426	0.0938182	0.0644445	0.257593	0.0622388	0.0788045	0.678514
cg00967316	0.845911	0.550215	0.521722	0.379535	0.44631	0.483656	0.658676	0.853537	0.382172	0.863245	0.550532	0.668473	0.595609	0.274507	0.165532	0.213821	0.351072	0.548706	0.813145	0.742868	0.408354	0.181204	0.399479	0.419551	0.356143	0.760712	0.414031	0.848767	0.713464	0.36671	0.802686	0.289805	0.703307	0.382992	0.449565	0.3831	0.726775	0.583243	0.442811	0.572309	0.355262	0.837242	0.504501	0.314803	0.673826	0.634583	0.179928	0.794871	0.840981
cg10574499	0.593636	0.285874	0.720557	0.395374	0.843733	0.271152	0.411931	0.713464	0.520077	0.265046	0.533854	0.151022	0.231134	0.735032	0.366925	0.356821	0.642071	0.829663	0.39699	0.586308	0.25629	0.35418	0.408778	0.682851	0.600452	0.264865	0.602458	0.536804	0.520968	0.502793	0.711743	0.573712	0.81586	0.149438	0.561376	0.498145	0.785108	0.774592	0.637772	0.738165	0.132469	0.239966	0.500184	0.534152	0.697599	0.781679	0.459194	0.630582	0.176378
cg05590294	0.330217	0.306733	0.24538	0.507223	0.16958	0.141328	0.825561	0.778238	0.276184	0.423776	0.344509	0.614037	0.794871	0.3034	0.210434	0.420791	0.331195	0.612287	0.294401	0.330511	0.602014	0.149317	0.45124	0.428548	0.545867	0.726775	0.590707	0.482075	0.231447	0.167425	0.538468	0.40104	0.330697	0.221622	0.223576	0.659182	0.16641	0.689215	0.327513	0.227521	0.312333	0.706194	0.282225	0.269053	0.29667	0.327616	0.829361	0.811421	0.675763
cg21312148	0.684109	0.371663	0.269417	0.225919	0.555308	0.207267	0.7126	0.786627	0.35078	0.85613	0.27375	0.721454	0.476345	0.754518	0.126082	0.201384	0.344926	0.230812	0.568836	0.662065	0.388057	0.110078	0.380085	0.27403	0.528705	0.689853	0.372601	0.694038	0.558574	0.299973	0.624112	0.328492	0.452255	0.30757	0.313136	0.616407	0.629388	0.530708	0.3618	0.219051	0.115807	0.836734	0.548612	0.257438	0.842719	0.401264	0.263848	0.3278	0.244375
cg19352038	0.499589	0.372298	0.507556	0.305132	0.604952	0.588828	0.418687	0.330402	0.324142	0.369807	0.731094	0.685011	0.242668	0.754798	0.701519	0.668918	0.405808	0.172348	0.149147	0.380085	0.418499	0.602014	0.62665	0.180198	0.646384	0.340728	0.105462	0.308156	0.123051	0.803422	0.498145	0.682931	0.194129	0.615262	0.146863	0.206324	0.146106	0.407349	0.134646	0.650419	0.160946	0.590707	0.328599	0.41935	0.565364	0.158838	0.442099	0.451449	0.183751
cg01883966	0.654122	0.644987	0.432234	0.80653	0.737368	0.932436	0.334789	0.454727	0.933933	0.821625	0.512024	0.857018	0.797345	0.957	0.919827	0.536707	0.697118	0.828916	0.385987	0.896988	0.793285	0.396189	0.46158	0.711591	0.33903	0.649686	0.588528	0.918315	0.448437	0.249588	0.878948	0.45032	0.884607	0.681291	0.802092	0.299348	0.730955	0.697118	0.475518	0.396806	0.529657	0.848089	0.601135	0.654745	0.766953	0.818645	0.154443	0.538968	0.241919
cg07123069	0.0481011	0.566948	0.527112	0.0864633	0.0687479	0.0408767	0.436223	0.031772	0.601805	0.0536457	0.538867	0.537334	0.297057	0.670394	0.138625	0.330611	0.677831	0.0502743	0.25561	0.242324	0.178246	0.0793569	0.293359	0.475411	0.0701599	0.192475	0.136543	0.0886259	0.0500884	0.794021	0.0601431	0.382379	0.168295	0.554378	0.0932178	0.0653752	0.0685401	0.0728661	0.0283406	0.158611	0.82432	0.35468	0.141223	0.055957	0.0754747	0.156059	0.079037	0.0552444	0.0590379
cg11879188	0.448862	0.557007	0.627803	0.390158	0.912025	0.842402	0.9055	0.894776	0.646384	0.433426	0.925493	0.353434	0.470684	0.69815	0.143171	0.918268	0.821722	0.461361	0.60914	0.719726	0.44864	0.832574	0.574529	0.848674	0.329508	0.477798	0.861756	0.874722	0.886169	0.811267	0.462877	0.594418	0.901979	0.283069	0.915561	0.747215	0.891906	0.384865	0.85858	0.668206	0.382379	0.498145	0.698866	0.949049	0.777747	0.937859	0.886329	0.536102	0.516008
cg07643942	0.414726	0.401388	0.336108	0.815754	0.719726	0.696256	0.65249	0.640119	0.806974	0.718801	0.201687	0.841347	0.806917	0.671952	0.1362	0.83598	0.214803	0.270443	0.798172	0.778238	0.849172	0.585796	0.771165	0.307189	0.702075	0.812156	0.770838	0.535784	0.34977	0.810607	0.504714	0.805993	0.556298	0.134491	0.610761	0.832908	0.552327	0.740414	0.800868	0.788814	0.212358	0.702373	0.784825	0.735682	0.832056	0.561474	0.169316	0.68781	0.842719
cg23282559	0.199358	0.164581	0.108595	0.1207	0.0925607	0.564849	0.0347823	0.132574	0.264581	0.408558	0.0754013	0.625892	0.269136	0.0727176	0.69864	0.69003	0.260281	0.142269	0.126971	0.314896	0.219601	0.725864	0.0636639	0.0959059	0.0533007	0.312242	0.102049	0.150171	0.224565	0.452661	0.158958	0.0920465	0.130649	0.592382	0.429271	0.554996	0.324652	0.0647785	0.0339183	0.801636	0.64029	0.205589	0.0776606	0.663482	0.0821296	0.626261	0.059888	0.182224	0.432831
cg03469054	0.126647	0.227792	0.0666542	0.0159511	0.134024	0.496698	0.0710823	0.0746261	0.0983229	0.455647	0.525703	0.60085	0.186033	0.54731	0.689134	0.509827	0.748292	0.0305474	0.473916	0.260651	0.132996	0.278051	0.100655	0.188241	0.0361656	0.162319	0.0935818	0.134685	0.108447	0.669803	0.444806	0.0862786	0.294401	0.731883	0.0450266	0.0451189	0.0931048	0.281747	0.0548005	0.0396952	0.69231	0.501874	0.555093	0.0374393	0.0371097	0.0450974	0.088549	0.105493	0.634778
cg12177677	0.463384	0.696359	0.633494	0.692809	0.138469	0.34462	0.622504	0.720557	0.49022	0.433734	0.819098	0.811725	0.831868	0.0835335	0.812257	0.341724	0.424492	0.738873	0.779042	0.604952	0.671672	0.372396	0.458155	0.376988	0.793739	0.80307	0.513231	0.521722	0.610471	0.313136	0.485013	0.428142	0.17892	0.413615	0.315703	0.734888	0.526799	0.778719	0.400831	0.654846	0.194649	0.845642	0.227719	0.426254	0.796374	0.323968	0.729701	0.797944	0.803698
cg25821963	0.024296	0.0471372	0.690991	0.0275896	0.0252403	0.0383168	0.0225417	0.218719	0.0283406	0.0293572	0.0772447	0.0460964	0.30692	0.48123	0.544795	0.0271309	0.548706	0.0271712	0.0216757	0.500184	0.066865	0.0297868	0.049997	0.0515031	0.296576	0.0380591	0.0248415	0.0484105	0.166782	0.106619	0.0386677	0.284166	0.0321825	0.0268433	0.742794	0.0535677	0.0321863	0.037473	0.0346398	0.705062	0.808417	0.0237565	0.0199125	0.0256798	0.0252028	0.0133036	0.216695	0.055529	0.617454
cg07550362	0.155217	0.368691	0.397398	0.202221	0.655568	0.150171	0.493132	0.432831	0.104992	0.350262	0.586604	0.395004	0.140911	0.360385	0.288399	0.630674	0.58115	0.439437	0.68136	0.251062	0.167795	0.253702	0.53051	0.238556	0.206481	0.139899	0.316875	0.0850391	0.273196	0.411518	0.346652	0.357841	0.250124	0.634489	0.460231	0.355752	0.0900006	0.102536	0.13502	0.724849	0.67326	0.241671	0.264766	0.440809	0.151395	0.0702914	0.70039	0.144965	0.299254
cg23904249	0.778066	0.826606	0.316108	0.319925	0.26725	0.732692	0.310052	0.351356	0.282329	0.668918	0.372099	0.803127	0.707784	0.675164	0.0979725	0.193489	0.751733	0.806096	0.41019	0.598406	0.553871	0.368691	0.40662	0.307776	0.288304	0.498944	0.340617	0.41432	0.328102	0.683262	0.428338	0.463477	0.784825	0.759147	0.400215	0.46645	0.433426	0.238138	0.204462	0.262735	0.216379	0.67751	0.29234	0.275928	0.204709	0.212285	0.447039	0.80632	0.342243
cg02983451	0.0561336	0.0700613	0.0393459	0.0777004	0.306538	0.0358287	0.543268	0.0339481	0.0517964	0.476976	0.0343751	0.0485028	0.03605	0.0363668	0.20552	0.160826	0.068716	0.0575426	0.66553	0.0521567	0.0386677	0.0360869	0.0418263	0.0472946	0.0401176	0.0434382	0.697187	0.0576643	0.238649	0.435384	0.0594962	0.247299	0.0316622	0.0356557	0.0568569	0.229879	0.109083	0.678179	0.0729788	0.084322	0.0351149	0.0908864	0.0697142	0.0486062	0.409746	0.53405	0.0667752	0.0460964	0.0434967
cg05440289	0.90611	0.76098	0.466551	0.925961	0.784758	0.757724	0.910448	0.745905	0.746163	0.810802	0.38869	0.869585	0.818155	0.88004	0.63164	0.503415	0.797138	0.891619	0.862819	0.759796	0.702001	0.267339	0.765589	0.408354	0.634229	0.865273	0.890338	0.901773	0.508268	0.547499	0.91694	0.81028	0.684608	0.593041	0.378187	0.591395	0.549609	0.869707	0.525266	0.21929	0.242506	0.888003	0.831524	0.239173	0.839862	0.511825	0.57727	0.43333	0.850256
cg04289385	0.324939	0.399585	0.513031	0.378889	0.408255	0.199137	0.600737	0.703536	0.217663	0.187026	0.133497	0.33913	0.228812	0.771348	0.464538	0.0320721	0.263848	0.0504665	0.0955951	0.399585	0.215438	0.850034	0.223326	0.42946	0.787091	0.34394	0.596702	0.189804	0.703625	0.793797	0.175958	0.386934	0.282704	0.435585	0.429075	0.665711	0.270255	0.531874	0.0553651	0.535365	0.784695	0.151075	0.419237	0.52474	0.763928	0.380391	0.780967	0.264952	0.702291
cg00233307	0.183321	0.608079	0.0248528	0.302692	0.031471	0.0925325	0.11533	0.0238924	0.0397582	0.0847504	0.0291099	0.241332	0.0983876	0.823872	0.0822923	0.0422675	0.624479	0.0307575	0.0307254	0.145731	0.03134	0.578045	0.0682225	0.0380885	0.208689	0.103486	0.128132	0.0547068	0.296372	0.013288	0.123493	0.042377	0.221378	0.709207	0.521279	0.0364135	0.0349623	0.0261382	0.0217215	0.0267207	0.0534009	0.246425	0.0659286	0.0259412	0.0640348	0.0422325	0.855173	0.40104	0.142704
cg15746719	0.0312285	0.0545983	0.0478147	0.0362144	0.69003	0.0388473	0.681526	0.0339563	0.0670375	0.0461239	0.0843002	0.143941	0.0214684	0.0295903	0.703463	0.913058	0.0898628	0.0306469	0.730653	0.0326238	0.0357627	0.256038	0.0221211	0.309955	0.041182	0.138786	0.036148	0.0643169	0.0392794	0.0532243	0.0284762	0.0390317	0.0179221	0.049386	0.312242	0.0891164	0.580442	0.551226	0.0503012	0.0396677	0.599026	0.0289548	0.17724	0.0567899	0.0295272	0.0262367	0.0195314	0.0235837	0.126971
cg14401837	0.465432	0.82737	0.311023	0.897396	0.883964	0.565744	0.876961	0.889778	0.462681	0.68773	0.646554	0.829866	0.874635	0.873656	0.834718	0.873733	0.837011	0.620165	0.90645	0.898102	0.899038	0.738723	0.857896	0.370341	0.619835	0.887109	0.876754	0.775776	0.872816	0.7786	0.272915	0.894368	0.715899	0.40489	0.843409	0.890227	0.842807	0.475219	0.823764	0.578727	0.376379	0.614037	0.757124	0.809895	0.917342	0.551438	0.313943	0.415556	0.535474
cg16101800	0.275748	0.318033	0.381308	0.546487	0.16691	0.505315	0.821325	0.659454	0.236526	0.449063	0.359158	0.332155	0.74597	0.0983229	0.849172	0.101853	0.294884	0.523148	0.38869	0.554691	0.730511	0.313249	0.814163	0.283165	0.268971	0.487953	0.706737	0.373926	0.33283	0.748292	0.214188	0.605986	0.591302	0.131621	0.492736	0.251062	0.37452	0.667165	0.365421	0.571348	0.146444	0.35955	0.280569	0.275655	0.570734	0.536407	0.770581	0.696619	0.201173
cg24496666	0.0442007	0.0439205	0.441341	0.526407	0.0573089	0.0420921	0.316013	0.0545576	0.0456994	0.080286	0.0411568	0.568266	0.471707	0.341426	0.29384	0.0357121	0.0268903	0.0463355	0.0533214	0.212045	0.106822	0.0912053	0.324142	0.600737	0.061075	0.0530609	0.0546787	0.0774809	0.645267	0.197069	0.0452386	0.424285	0.0584335	0.0291705	0.0647475	0.0840674	0.0400501	0.0532529	0.0372654	0.625312	0.0298449	0.0302537	0.0373609	0.0436697	0.167668	0.173144	0.0582484	0.0293914	0.0434702
cg00795812	0.137201	0.346977	0.437684	0.400638	0.211743	0.752626	0.217093	0.206481	0.536201	0.351641	0.0581705	0.0889057	0.184503	0.703463	0.538247	0.0742074	0.318134	0.132009	0.134731	0.401614	0.154497	0.739652	0.331763	0.199358	0.765647	0.0856255	0.679638	0.288495	0.362703	0.15751	0.30969	0.322188	0.67638	0.0644856	0.530183	0.675854	0.210211	0.128182	0.121453	0.69544	0.141126	0.534563	0.345238	0.216306	0.341624	0.370236	0.636449	0.209572	0.599582
cg11377136	0.305132	0.183606	0.839405	0.240908	0.41019	0.728771	0.160767	0.407146	0.506836	0.129185	0.5043	0.850593	0.121407	0.072772	0.843592	0.450734	0.691231	0.0979725	0.310638	0.795811	0.176237	0.860537	0.422365	0.192774	0.0543347	0.168862	0.376161	0.388465	0.355851	0.317435	0.145897	0.559826	0.0915314	0.0442937	0.31452	0.212921	0.297339	0.0568008	0.397501	0.441341	0.0838116	0.135307	0.603044	0.517688	0.0723279	0.509626	0.121116	0.360991	0.670976
cg18884741	0.771032	0.715204	0.355462	0.679555	0.378295	0.817191	0.557807	0.486094	0.535365	0.737569	0.679895	0.863668	0.82437	0.122142	0.959393	0.347496	0.345742	0.698559	0.536407	0.69231	0.881862	0.708092	0.847645	0.56565	0.231295	0.869072	0.527395	0.878032	0.248151	0.811673	0.79362	0.452551	0.419885	0.252332	0.65142	0.27946	0.560847	0.864248	0.240116	0.209259	0.337428	0.439243	0.497296	0.432726	0.476976	0.314222	0.740127	0.455231	0.24781
cg14659547	0.37606	0.579326	0.897979	0.911727	0.888652	0.76677	0.926834	0.737368	0.287751	0.392412	0.786262	0.910495	0.80653	0.730722	0.885142	0.708796	0.814833	0.848317	0.463172	0.83945	0.831817	0.646192	0.906496	0.841849	0.858672	0.603227	0.813964	0.790131	0.779487	0.317256	0.584432	0.844665	0.698471	0.873494	0.845472	0.629652	0.841437	0.703536	0.749884	0.222564	0.133796	0.806702	0.642155	0.554886	0.623919	0.702001	0.750478	0.364367	0.784026
cg00462994	0.0328767	0.0896983	0.230489	0.0321098	0.185967	0.471489	0.277961	0.0515649	0.0597068	0.0731972	0.0624756	0.253604	0.362599	0.760513	0.0183723	0.0368312	0.288204	0.0155891	0.570425	0.228656	0.0557493	0.730047	0.0434009	0.0578999	0.117069	0.0379942	0.0393888	0.0595583	0.0618752	0.606394	0.0412936	0.495631	0.105982	0.0378974	0.0664893	0.373825	0.0378067	0.0355518	0.0573426	0.724706	0.758791	0.029783	0.230728	0.0460964	0.0289013	0.0698349	0.312153	0.0373065	0.350358
cg26069745	0.804533	0.657181	0.796841	0.644801	0.625401	0.392088	0.51118	0.178651	0.217177	0.478211	0.878195	0.316683	0.237889	0.83641	0.7541	0.815603	0.756976	0.354366	0.384451	0.492429	0.448546	0.815549	0.686495	0.269053	0.40489	0.523347	0.679016	0.482906	0.34822	0.856301	0.468298	0.691395	0.37332	0.866306	0.61737	0.707859	0.427602	0.550727	0.613836	0.886816	0.91266	0.770838	0.736823	0.692637	0.800982	0.542552	0.788453	0.814467	0.596119
cg12382902	0.00776797	0.0165491	0.290515	0.0134074	0.0100012	0.526593	0.00947688	0.00731291	0.0104863	0.0461393	0.4542	0.00419455	0.00551186	0.0957285	0.0077895	0.00579039	0.636449	0.0135961	0.0186958	0.354473	0.00671735	0.0147814	0.00678476	0.00723005	0.00911027	0.00477061	0.00840398	0.0141007	0.0572962	0.0135199	0.00921329	0.0107882	0.0112801	0.29468	0.00927526	0.00845133	0.0112574	0.00750757	0.00670242	0.215438	0.687558	0.283165	0.504914	0.0112003	0.00562666	0.0130672	0.00751275	0.0158311	0.183606
cg18420965	0.196474	0.634684	0.191799	0.0290054	0.0498203	0.378701	0.0505779	0.0550116	0.455231	0.1167	0.0541708	0.262196	0.081273	0.442198	0.0419695	0.0808444	0.824995	0.0554275	0.30199	0.142474	0.0620182	0.612391	0.042557	0.0451725	0.524949	0.032873	0.0736686	0.0745897	0.0524033	0.434271	0.403774	0.0390221	0.479234	0.0658123	0.0667145	0.0535196	0.0591566	0.100425	0.048118	0.0605756	0.228218	0.273938	0.465535	0.083101	0.419237	0.0769077	0.0342494	0.30425	0.0446859
cg01718139	0.759465	0.489294	0.16691	0.233007	0.353864	0.467784	0.715975	0.207761	0.385795	0.538468	0.480718	0.254217	0.780908	0.317756	0.0954675	0.326109	0.336543	0.85402	0.348745	0.459005	0.431785	0.191366	0.231763	0.337331	0.381216	0.753021	0.297154	0.713615	0.279918	0.389958	0.747995	0.536201	0.257688	0.558909	0.260011	0.286531	0.488967	0.18747	0.469243	0.153521	0.669968	0.798611	0.431025	0.310447	0.534563	0.474382	0.163899	0.828293	0.746163
cg18741908	0.445989	0.230144	0.483761	0.670053	0.353434	0.167859	0.554691	0.208372	0.166531	0.367759	0.194958	0.838099	0.445989	0.104409	0.836644	0.0612779	0.215906	0.421926	0.377402	0.334684	0.475627	0.26421	0.655916	0.214035	0.240649	0.682256	0.387957	0.255781	0.0881711	0.202749	0.337728	0.758124	0.131861	0.158179	0.409637	0.304828	0.213151	0.343356	0.0658406	0.202522	0.255159	0.321995	0.27106	0.11067	0.288014	0.0360594	0.2119	0.321908	0.51643
cg16517394	0.0570538	0.344509	0.600256	0.502516	0.44864	0.722223	0.0702324	0.277038	0.399479	0.0542101	0.236007	0.0218934	0.0441941	0.60914	0.4106	0.028431	0.390446	0.0831878	0.191513	0.204871	0.310735	0.503913	0.413301	0.624112	0.68872	0.0315222	0.0928512	0.0732372	0.468597	0.676653	0.0484435	0.460231	0.197871	0.568063	0.202749	0.313458	0.0804302	0.591202	0.160289	0.731997	0.821229	0.12518	0.133364	0.237298	0.636262	0.0764967	0.711743	0.317256	0.246791
cg07447773	0.376885	0.59871	0.885184	0.874027	0.581459	0.286531	0.931612	0.752313	0.600737	0.332721	0.530708	0.642638	0.369302	0.798335	0.149784	0.496507	0.337728	0.837523	0.702001	0.576181	0.711209	0.314125	0.801749	0.74149	0.288495	0.382785	0.807988	0.743007	0.7966	0.535673	0.226393	0.902953	0.797393	0.183751	0.683177	0.663307	0.750547	0.430185	0.463172	0.411618	0.450019	0.215204	0.386391	0.725501	0.391363	0.831244	0.818947	0.246337	0.443456
cg08108641	0.791631	0.645733	0.834476	0.917479	0.45971	0.45124	0.666403	0.289251	0.793339	0.641458	0.796892	0.440593	0.779487	0.51936	0.896777	0.309095	0.463053	0.805411	0.87534	0.573106	0.697366	0.828441	0.885693	0.683349	0.724706	0.677831	0.36765	0.909012	0.469344	0.382785	0.826606	0.595609	0.608755	0.570112	0.916772	0.869278	0.854084	0.525171	0.44864	0.66553	0.140655	0.756508	0.679277	0.66305	0.541413	0.58588	0.143776	0.743282	0.237298
cg03670238	0.542552	0.291569	0.39699	0.0853858	0.19618	0.285874	0.392918	0.338025	0.307013	0.627135	0.166983	0.0875891	0.201456	0.106561	0.0767326	0.0634988	0.191295	0.161188	0.207669	0.548101	0.227561	0.10577	0.429875	0.25831	0.243537	0.175221	0.235057	0.542149	0.240116	0.0850645	0.354069	0.130604	0.669534	0.0919895	0.365017	0.281476	0.233671	0.124132	0.321315	0.185312	0.12232	0.64717	0.13157	0.167481	0.178318	0.30551	0.103758	0.516323	0.160289
cg27100123	0.628443	0.923687	0.641898	0.424821	0.341246	0.876515	0.387338	0.360495	0.839052	0.661176	0.612195	0.206562	0.560953	0.807248	0.509522	0.30551	0.875132	0.864292	0.651762	0.928132	0.480087	0.606789	0.432831	0.585139	0.546702	0.774275	0.4907	0.885846	0.575925	0.908555	0.729633	0.192848	0.906068	0.619288	0.824124	0.445015	0.621749	0.660177	0.401819	0.805933	0.933685	0.700632	0.672208	0.765647	0.760001	0.682021	0.63145	0.427933	0.590499
cg17827767	0.55397	0.679724	0.465337	0.576232	0.761563	0.431785	0.648178	0.816914	0.65249	0.776808	0.194884	0.602768	0.612578	0.92209	0.183534	0.742304	0.509728	0.806642	0.652588	0.882869	0.635333	0.479863	0.664889	0.443241	0.818548	0.904712	0.859677	0.789849	0.870946	0.86141	0.7798	0.452255	0.916772	0.13282	0.445229	0.748789	0.771859	0.398585	0.736036	0.626074	0.19795	0.872905	0.819717	0.846625	0.770055	0.721078	0.938087	0.610852	0.770778
cg04376312	0.640564	0.222049	0.331101	0.737936	0.254486	0.164713	0.196104	0.366327	0.259463	0.465943	0.205741	0.641987	0.405396	0.249054	0.121241	0.0605636	0.125717	0.46207	0.212752	0.343256	0.702707	0.204945	0.320804	0.481754	0.19298	0.359362	0.242506	0.337237	0.355565	0.393829	0.31529	0.433639	0.193774	0.22188	0.283718	0.136691	0.270335	0.200263	0.157809	0.385795	0.602663	0.631177	0.156659	0.192102	0.232855	0.291099	0.709034	0.492215	0.31433
cg23026995	0.225581	0.412685	0.521824	0.452971	0.658722	0.479542	0.552437	0.56432	0.560225	0.182293	0.358847	0.745574	0.47058	0.391566	0.456722	0.576856	0.228507	0.48197	0.466942	0.415044	0.578255	0.487418	0.675255	0.303589	0.277131	0.404587	0.461264	0.255517	0.573005	0.751142	0.126129	0.637219	0.597636	0.323034	0.561578	0.804297	0.655843	0.784457	0.769867	0.395099	0.602559	0.129508	0.590298	0.703211	0.606975	0.724774	0.147912	0.131007	0.445446
cg09640202	0.579016	0.800982	0.619692	0.820383	0.631821	0.845379	0.75249	0.306135	0.825911	0.779668	0.804804	0.821176	0.728203	0.906024	0.757124	0.605252	0.768469	0.747072	0.557325	0.75397	0.819307	0.800587	0.868014	0.427822	0.67638	0.614037	0.397928	0.748851	0.312333	0.775144	0.753434	0.817191	0.807988	0.830827	0.851986	0.279918	0.616305	0.848317	0.384347	0.393027	0.478848	0.762361	0.613836	0.355851	0.430614	0.472229	0.81329	0.449565	0.200263
cg03001305	0.484088	0.35242	0.108447	0.252282	0.228507	0.386194	0.102536	0.255955	0.465648	0.33031	0.111763	0.132671	0.196849	0.307968	0.114954	0.11304	0.161901	0.217576	0.113853	0.245729	0.257438	0.312531	0.152963	0.551917	0.574019	0.203947	0.237966	0.162259	0.451653	0.558381	0.420599	0.127209	0.24292	0.733069	0.308527	0.325896	0.143941	0.0363135	0.113118	0.299434	0.815136	0.203947	0.0836035	0.0845942	0.450838	0.549609	0.228419	0.639446	0.500299
cg11800672	0.635157	0.365017	0.840797	0.64664	0.799814	0.313249	0.806702	0.714834	0.66926	0.438308	0.640663	0.710746	0.513031	0.1177	0.743902	0.102471	0.604681	0.482906	0.705472	0.553036	0.385063	0.268788	0.79306	0.573913	0.24504	0.821722	0.840238	0.768343	0.709123	0.766643	0.416363	0.70221	0.757781	0.294039	0.709443	0.713374	0.400638	0.738582	0.726405	0.833407	0.752347	0.422837	0.615355	0.845642	0.744954	0.86597	0.788875	0.285785	0.316013
cg21073927	0.0390221	0.0960269	0.139565	0.0821762	0.133455	0.242668	0.399376	0.0839292	0.0783843	0.0309243	0.661629	0.492112	0.132245	0.478535	0.530283	0.673941	0.614037	0.0162949	0.375659	0.356918	0.125457	0.0259768	0.104409	0.601724	0.0342923	0.0411182	0.0485344	0.081273	0.06066	0.65051	0.0427958	0.467888	0.237208	0.609721	0.106855	0.10679	0.0973403	0.185174	0.0503428	0.10577	0.757661	0.0412058	0.441657	0.0592751	0.054431	0.400018	0.0619256	0.0513538	0.427709
cg15364618	0.19419	0.496794	0.760911	0.286908	0.727901	0.549609	0.703625	0.79643	0.734064	0.234195	0.561578	0.548508	0.348522	0.773329	0.656086	0.555308	0.821671	0.308527	0.236693	0.635333	0.28701	0.830873	0.670976	0.819607	0.626074	0.278051	0.788002	0.300261	0.823764	0.711294	0.583045	0.739238	0.511921	0.681693	0.757195	0.740338	0.564849	0.754382	0.872448	0.883073	0.204945	0.267762	0.838002	0.807138	0.549716	0.753164	0.781025	0.496204	0.576232
cg14189571	0.369807	0.379655	0.149611	0.0904786	0.152357	0.288495	0.378611	0.108879	0.255159	0.206948	0.296576	0.779242	0.177372	0.588148	0.69503	0.425541	0.74048	0.579952	0.118474	0.226501	0.247299	0.436413	0.477393	0.0784037	0.104959	0.198391	0.0963138	0.132574	0.194064	0.677831	0.374426	0.585982	0.405601	0.606087	0.142269	0.0874655	0.162018	0.271919	0.0856255	0.212587	0.659812	0.262654	0.682777	0.141904	0.204013	0.273847	0.614783	0.296471	0.634313
cg20134215	0.372198	0.541628	0.416777	0.341624	0.188173	0.652588	0.240908	0.124132	0.199358	0.43748	0.333518	0.692473	0.203364	0.100182	0.457542	0.0951301	0.748511	0.10415	0.113962	0.435981	0.321522	0.264581	0.227078	0.792949	0.433534	0.22945	0.146662	0.250988	0.205021	0.802367	0.372927	0.671756	0.553652	0.0875384	0.129924	0.469441	0.23218	0.29375	0.0863213	0.458155	0.830776	0.456827	0.270702	0.217991	0.129652	0.0961085	0.420292	0.353326	0.720931
cg06074920	0.930726	0.880589	0.808668	0.452255	0.688557	0.917163	0.883592	0.59986	0.57251	0.951346	0.536707	0.810115	0.92209	0.938035	0.932817	0.319456	0.89461	0.532395	0.455969	0.93062	0.750082	0.444301	0.67057	0.568564	0.728699	0.899909	0.584829	0.915383	0.581248	0.940662	0.90913	0.3831	0.889484	0.817341	0.45032	0.689292	0.763856	0.943208	0.499152	0.547202	0.877993	0.970096	0.588828	0.749884	0.634684	0.79042	0.905415	0.955596	0.680331
cg23865698	0.141699	0.751402	0.17055	0.513953	0.157101	0.688391	0.630311	0.332538	0.524847	0.382172	0.293659	0.403664	0.642447	0.595221	0.531131	0.230653	0.259463	0.380189	0.343256	0.478535	0.592473	0.609914	0.539657	0.406126	0.758861	0.719804	0.503615	0.388781	0.329118	0.121547	0.518869	0.571348	0.10679	0.704982	0.463701	0.526593	0.240199	0.382683	0.400528	0.827	0.0988955	0.39104	0.439983	0.493529	0.454305	0.466051	0.835561	0.487744	0.62298
cg14419187	0.335002	0.515902	0.271733	0.096524	0.0703552	0.696172	0.191366	0.103084	0.15335	0.0477118	0.156234	0.266883	0.0542738	0.0551438	0.430294	0.0463995	0.372718	0.273391	0.564536	0.0729788	0.102083	0.909561	0.0830547	0.0516971	0.421307	0.106754	0.0654605	0.107615	0.0450266	0.51012	0.406518	0.16912	0.09367	0.691312	0.172996	0.0470222	0.0297978	0.0267972	0.0816383	0.18388	0.768343	0.299533	0.227561	0.358038	0.331	0.0518438	0.0283138	0.45114	0.0468722
cg18493182	0.668112	0.834279	0.685494	0.85947	0.831626	0.816175	0.541628	0.599492	0.407834	0.616602	0.766181	0.245819	0.496307	0.906794	0.902868	0.29375	0.825505	0.430806	0.34822	0.816448	0.460624	0.594808	0.497501	0.712284	0.71842	0.737089	0.472752	0.69872	0.770653	0.922735	0.667925	0.329508	0.892964	0.803475	0.652044	0.350675	0.468597	0.636063	0.541316	0.604777	0.467971	0.496204	0.603492	0.391673	0.490112	0.895185	0.156352	0.7556	0.847057
cg24607398	0.27946	0.734689	0.272188	0.600561	0.786973	0.585796	0.270801	0.22914	0.701365	0.411114	0.351356	0.338416	0.281835	0.810494	0.744682	0.133317	0.756444	0.390052	0.475627	0.577766	0.31885	0.187535	0.184086	0.232262	0.246337	0.419994	0.177562	0.328397	0.225412	0.757853	0.689608	0.133091	0.780674	0.583729	0.673866	0.724488	0.497296	0.551642	0.171352	0.274135	0.825911	0.166033	0.242324	0.204154	0.485241	0.182088	0.271349	0.220821	0.255517
cg24358465	0.0123876	0.0601696	0.92839	0.0381654	0.01005	0.0622531	0.0119095	0.0308036	0.0252375	0.0109987	0.0208851	0.0125165	0.011107	0.0139568	0.0166365	0.0376103	0.0203863	0.0719961	0.0257814	0.0305474	0.0156786	0.010523	0.0129059	0.00956321	0.0116822	0.0222613	0.0303012	0.0243829	0.963475	0.0370597	0.0116638	0.0233435	0.0160545	0.0393403	0.0259069	0.162761	0.010014	0.0230776	0.0408705	0.837573	0.022794	0.0113775	0.0307254	0.0341439	0.030935	0.041107	0.825561	0.0191254	0.021678
cg19537511	0.271349	0.346156	0.678926	0.113584	0.464935	0.544977	0.727018	0.359257	0.599492	0.292622	0.248873	0.0783626	0.221622	0.682178	0.106186	0.104379	0.641633	0.311279	0.513741	0.389958	0.193774	0.704326	0.245117	0.396713	0.464735	0.366807	0.513533	0.499267	0.669884	0.11662	0.377497	0.161065	0.546897	0.0928771	0.615066	0.802092	0.357946	0.138625	0.328599	0.67938	0.125628	0.337527	0.355939	0.767945	0.408456	0.786749	0.848948	0.354777	0.381114
cg09188980	0.0470977	0.0729027	0.735308	0.0890096	0.0585518	0.0655789	0.246791	0.169782	0.119339	0.0506228	0.202673	0.0416702	0.0652838	0.0414998	0.26626	0.0309243	0.0619903	0.0229085	0.508365	0.190289	0.393933	0.54408	0.396898	0.111037	0.148639	0.0743382	0.570636	0.103318	0.0529549	0.0935526	0.0475814	0.554157	0.0873381	0.359362	0.392412	0.574529	0.0878403	0.0900292	0.168295	0.442601	0.0276557	0.253157	0.0445749	0.261758	0.129279	0.0840436	0.545465	0.0917206	0.043887
cg11241627	0.059084	0.26698	0.273938	0.356821	0.203437	0.147307	0.0581705	0.568467	0.0548713	0.110634	0.566948	0.505221	0.0429111	0.0862574	0.724105	0.289633	0.507767	0.0456356	0.134831	0.0945846	0.217093	0.198981	0.357008	0.130066	0.156352	0.0484609	0.0888552	0.146662	0.26257	0.694194	0.114954	0.526308	0.214963	0.614037	0.153127	0.0408989	0.271262	0.813093	0.0462978	0.0902087	0.159144	0.306055	0.264302	0.159502	0.392918	0.361097	0.603889	0.0571262	0.513533
cg17892556	0.0285553	0.0200567	0.0216682	0.0418517	0.0369369	0.763143	0.0443005	0.0334348	0.0553859	0.0302175	0.0435582	0.0274084	0.0355273	0.0117715	0.0354052	0.0202979	0.0203844	0.0455665	0.0558721	0.484497	0.0186846	0.0251881	0.0396559	0.0428551	0.0457686	0.0263212	0.0235121	0.0356649	0.034428	0.0253014	0.0244718	0.0307892	0.0219981	0.0253596	0.0211857	0.0162087	0.0303687	0.034791	0.0236556	0.0486946	0.0222913	0.780674	0.0349574	0.0486473	0.0286855	0.0547377	0.0383999	0.049668	0.0210102
cg17267907	0.530283	0.309782	0.366807	0.664102	0.827845	0.307968	0.531537	0.585982	0.42596	0.238222	0.428142	0.71694	0.373218	0.468077	0.206796	0.753848	0.379317	0.769802	0.74524	0.740555	0.600067	0.106822	0.554596	0.238052	0.602768	0.582821	0.618872	0.681442	0.336543	0.329414	0.236867	0.39426	0.213892	0.324456	0.131813	0.422486	0.721302	0.750153	0.729484	0.297729	0.0938182	0.585322	0.74511	0.825911	0.730798	0.715438	0.456932	0.553036	0.309198
cg19241311	0.793912	0.255862	0.15594	0.223747	0.151509	0.377298	0.289446	0.488484	0.216542	0.621659	0.157101	0.213965	0.455231	0.250475	0.91296	0.0318175	0.148691	0.262386	0.201456	0.777066	0.309387	0.198464	0.41452	0.288204	0.754657	0.487527	0.366234	0.579224	0.430614	0.335508	0.772827	0.460029	0.414422	0.30969	0.216542	0.48764	0.247136	0.796841	0.145586	0.236007	0.447153	0.799976	0.247971	0.398878	0.362506	0.325805	0.467682	0.590092	0.635798
cg24387380	0.381848	0.278707	0.245472	0.449363	0.288304	0.168112	0.372198	0.766643	0.308346	0.685338	0.356143	0.256479	0.40498	0.235306	0.0974631	0.618974	0.283625	0.0932771	0.45971	0.594608	0.373508	0.395764	0.206637	0.599772	0.488967	0.595012	0.616788	0.622218	0.353019	0.282618	0.266721	0.341624	0.483344	0.111219	0.508268	0.757195	0.704256	0.717648	0.70896	0.312858	0.216465	0.607799	0.397182	0.307292	0.724635	0.610371	0.28859	0.234705	0.60914
cg04567009	0.467682	0.461469	0.420292	0.725136	0.785164	0.612483	0.795358	0.692232	0.389958	0.801534	0.374126	0.853402	0.652317	0.755921	0.172996	0.78685	0.410302	0.592759	0.619967	0.888288	0.528211	0.63274	0.581755	0.316283	0.580344	0.65863	0.87434	0.745834	0.64075	0.423464	0.464009	0.678344	0.706282	0.235481	0.476678	0.643446	0.733689	0.590499	0.734749	0.36078	0.094935	0.801424	0.739788	0.894651	0.67876	0.419123	0.255517	0.345845	0.759344
cg23181133	0.278811	0.371999	0.828092	0.875132	0.565459	0.152123	0.726775	0.736419	0.723797	0.305965	0.419771	0.345342	0.467784	0.697756	0.593636	0.498556	0.16912	0.392621	0.764661	0.522151	0.46443	0.699892	0.635972	0.323457	0.769103	0.530283	0.763725	0.44724	0.23927	0.665621	0.223506	0.503322	0.157743	0.60085	0.648459	0.781025	0.541413	0.660722	0.804199	0.614686	0.771478	0.291478	0.688557	0.766831	0.685994	0.724635	0.750827	0.230578	0.710286
cg25363445	0.387231	0.345138	0.541948	0.314995	0.631994	0.264486	0.382483	0.1613	0.414422	0.468298	0.529448	0.457542	0.249674	0.59492	0.382882	0.376784	0.487418	0.296195	0.411414	0.329118	0.177306	0.79598	0.652859	0.675423	0.422035	0.360495	0.118809	0.564536	0.580538	0.654033	0.181748	0.550825	0.222975	0.41019	0.233087	0.187819	0.0977252	0.591993	0.133091	0.865641	0.363853	0.191295	0.443566	0.427602	0.255862	0.572216	0.730511	0.668381	0.611523
cg10771262	0.139584	0.108809	0.52599	0.161188	0.601047	0.0663099	0.697276	0.541837	0.382065	0.324749	0.665346	0.48061	0.0830311	0.132901	0.0543446	0.676471	0.147202	0.0962133	0.578145	0.154443	0.171547	0.213151	0.667497	0.704666	0.467784	0.0708973	0.305965	0.609322	0.430294	0.68102	0.443456	0.629108	0.142321	0.222975	0.708876	0.799245	0.455038	0.650223	0.659812	0.547499	0.31876	0.221214	0.26923	0.589501	0.440496	0.344926	0.598223	0.509522	0.525266
cg24776407	0.683103	0.436223	0.678514	0.477798	0.862165	0.33852	0.814678	0.871154	0.753913	0.502297	0.737368	0.812571	0.828441	0.296372	0.849627	0.540063	0.3309	0.509522	0.821027	0.693041	0.839677	0.882427	0.834624	0.838473	0.48061	0.77943	0.851505	0.842944	0.881574	0.818645	0.559014	0.890811	0.824665	0.307872	0.442811	0.589022	0.629108	0.807401	0.481439	0.676653	0.403346	0.476976	0.66829	0.64691	0.791104	0.913197	0.307378	0.559406	0.854191
cg02844545	0.408354	0.44071	0.32631	0.187535	0.588331	0.512537	0.0805629	0.0996042	0.191799	0.370646	0.492931	0.674908	0.397813	0.619594	0.088289	0.0430606	0.148809	0.0796712	0.185381	0.494166	0.193346	0.09367	0.540877	0.132347	0.0931048	0.225836	0.0782558	0.229368	0.190218	0.455969	0.200961	0.537517	0.286235	0.725864	0.232855	0.530183	0.163475	0.0878403	0.125079	0.678514	0.833315	0.353965	0.17208	0.0771859	0.589501	0.160478	0.321416	0.569508	0.540877
cg23037403	0.111538	0.638883	0.0472341	0.0311309	0.121547	0.483344	0.0594848	0.171483	0.118389	0.10867	0.094012	0.233581	0.084322	0.601898	0.675078	0.0408347	0.615173	0.515496	0.0477204	0.492328	0.0823802	0.0347823	0.159144	0.672029	0.0353829	0.0524033	0.0699219	0.151722	0.0646866	0.689369	0.0701909	0.219446	0.512736	0.376784	0.0771269	0.0479459	0.159144	0.152357	0.0534398	0.0718249	0.610567	0.53305	0.537721	0.0675408	0.0719621	0.0798943	0.0274765	0.225581	0.661973
cg26365854	0.0147354	0.0631011	0.571915	0.0218406	0.0248444	0.0700066	0.445229	0.0206435	0.0712846	0.0287982	0.0386459	0.21693	0.0803068	0.821229	0.0221312	0.0157037	0.677752	0.080172	0.0163988	0.377874	0.0214604	0.0192943	0.0210686	0.0186821	0.00937956	0.0150349	0.0363319	0.0317566	0.0242935	0.1234	0.0117927	0.35078	0.00754731	0.0489112	0.0154625	0.00929497	0.0179264	0.0217878	0.0100012	0.0368021	0.022247	0.430915	0.0299388	0.0230488	0.0526837	0.0392357	0.731449	0.0331792	0.0149557
cg13718960	0.230236	0.514357	0.597723	0.146815	0.369717	0.185528	0.505315	0.597056	0.373119	0.233501	0.362506	0.0794979	0.192102	0.753704	0.0501666	0.0915562	0.56786	0.288304	0.196849	0.441245	0.373218	0.180587	0.447336	0.60914	0.229706	0.265046	0.39055	0.827611	0.253247	0.746095	0.176173	0.330217	0.785342	0.213739	0.244454	0.145897	0.520381	0.699012	0.25613	0.674424	0.248873	0.112024	0.373073	0.320119	0.276467	0.399479	0.898595	0.120487	0.271919
cg01550148	0.74135	0.797393	0.77371	0.366925	0.748723	0.772765	0.667079	0.52841	0.688557	0.718265	0.882829	0.712847	0.371663	0.900558	0.892923	0.934839	0.878155	0.79879	0.559618	0.600561	0.430614	0.887153	0.212045	0.839183	0.900362	0.566641	0.825657	0.361097	0.838473	0.860969	0.79745	0.722145	0.605528	0.894086	0.55183	0.853013	0.678673	0.882584	0.885733	0.757661	0.929423	0.754732	0.918775	0.799138	0.746932	0.307292	0.882273	0.698304	0.780224
cg14882700	0.181551	0.798335	0.684027	0.274408	0.24175	0.781379	0.41565	0.301421	0.248963	0.17042	0.469949	0.35764	0.388158	0.803529	0.767355	0.242757	0.833745	0.756114	0.175221	0.616005	0.195486	0.831053	0.387766	0.49182	0.300635	0.169449	0.333212	0.265912	0.19298	0.823417	0.297154	0.260946	0.701836	0.723415	0.353434	0.29468	0.24292	0.400934	0.372718	0.570308	0.85466	0.627232	0.716371	0.345238	0.209805	0.472128	0.192916	0.24781	0.814729
cg04637372	0.75458	0.580739	0.488376	0.335416	0.816859	0.80571	0.875589	0.789908	0.687387	0.564431	0.464844	0.478317	0.508075	0.201102	0.242324	0.160946	0.25533	0.455868	0.711371	0.826163	0.378504	0.46158	0.439547	0.419123	0.323034	0.753164	0.576536	0.808668	0.566848	0.828293	0.51313	0.382483	0.60095	0.248234	0.487331	0.717332	0.823975	0.602366	0.604582	0.81262	0.480087	0.882915	0.377686	0.869316	0.895693	0.856883	0.29167	0.859043	0.60085
cg09656934	0.346868	0.734453	0.831892	0.882953	0.646009	0.855085	0.734527	0.881904	0.805411	0.700632	0.827156	0.849219	0.688892	0.836868	0.809416	0.884485	0.819662	0.782995	0.59471	0.250475	0.771929	0.703307	0.810494	0.753229	0.412483	0.400426	0.711371	0.255955	0.210434	0.866776	0.648548	0.863029	0.665711	0.841575	0.723108	0.628928	0.638229	0.869072	0.830392	0.841212	0.922275	0.478535	0.873811	0.845777	0.512227	0.433128	0.782383	0.596873	0.804199
cg15746187	0.684534	0.77937	0.189439	0.325226	0.846321	0.818499	0.286531	0.270531	0.845197	0.598815	0.605798	0.220572	0.248401	0.824222	0.448246	0.092235	0.709034	0.219927	0.476345	0.790364	0.383311	0.769739	0.26421	0.499046	0.607641	0.507863	0.406729	0.593429	0.676199	0.645827	0.461469	0.472752	0.66393	0.478317	0.710516	0.576424	0.848364	0.152789	0.320022	0.478013	0.818003	0.480816	0.35813	0.375447	0.838148	0.777005	0.109669	0.676566	0.756182
cg10266490	0.247723	0.366327	0.430408	0.186733	0.617823	0.47006	0.498556	0.31452	0.512736	0.209572	0.0704055	0.0549908	0.0345221	0.623353	0.498145	0.0210686	0.41524	0.555522	0.238138	0.201317	0.0719306	0.589898	0.0839526	0.283902	0.502704	0.0415234	0.108447	0.136789	0.694446	0.49343	0.303089	0.0401817	0.147912	0.718345	0.349467	0.49343	0.516541	0.0487749	0.301615	0.716052	0.759007	0.305323	0.0857608	0.142269	0.601335	0.48568	0.174089	0.380714	0.339528
cg00995065	0.3623	0.802263	0.331763	0.342963	0.800363	0.206562	0.754314	0.642071	0.28633	0.544977	0.660546	0.794871	0.48918	0.0975877	0.36671	0.735531	0.566343	0.774141	0.781082	0.482496	0.298489	0.340728	0.367449	0.568162	0.330217	0.560746	0.238736	0.563494	0.546182	0.452971	0.481008	0.271733	0.822944	0.835366	0.422261	0.28252	0.512626	0.172221	0.278051	0.153127	0.175832	0.349467	0.495322	0.61939	0.325896	0.207267	0.44175	0.254404	0.699972
cg12288726	0.790531	0.572107	0.474698	0.838785	0.350576	0.778846	0.321119	0.248326	0.389201	0.760065	0.342673	0.613434	0.536517	0.482795	0.764202	0.31885	0.863158	0.288884	0.549716	0.647345	0.591504	0.178376	0.551119	0.310638	0.587462	0.583243	0.243625	0.704022	0.273585	0.467682	0.806974	0.624575	0.584622	0.188538	0.47687	0.557325	0.405917	0.210744	0.288788	0.583045	0.437684	0.693784	0.394887	0.369515	0.463384	0.505626	0.764722	0.789908	0.279819
cg26514492	0.391363	0.205957	0.159818	0.182626	0.618124	0.100721	0.591102	0.646297	0.110999	0.257353	0.466942	0.135403	0.358652	0.782383	0.105664	0.339317	0.18973	0.362401	0.35468	0.323348	0.260102	0.53317	0.102277	0.441245	0.265828	0.571537	0.499981	0.359057	0.4204	0.844357	0.318552	0.138786	0.209935	0.0763001	0.275075	0.527395	0.248873	0.0257144	0.443241	0.520473	0.362401	0.411618	0.317169	0.798668	0.607265	0.632654	0.307292	0.343356	0.617094
cg14345882	0.272369	0.765026	0.228736	0.392088	0.418499	0.457245	0.358557	0.625222	0.255053	0.426472	0.621255	0.26794	0.66768	0.76924	0.0735618	0.589218	0.466151	0.158368	0.511394	0.343063	0.452441	0.716628	0.204709	0.454305	0.731166	0.434879	0.470252	0.220726	0.627232	0.282225	0.603889	0.276467	0.31619	0.575925	0.684363	0.598926	0.243971	0.623353	0.281835	0.305601	0.857942	0.476461	0.292454	0.411721	0.558381	0.505221	0.806974	0.361199	0.51097
cg21716693	0.381405	0.507965	0.66243	0.696007	0.802092	0.654745	0.355262	0.261572	0.757661	0.10838	0.622218	0.148809	0.175153	0.825397	0.495631	0.531874	0.20751	0.717877	0.664471	0.409746	0.727542	0.869278	0.540154	0.58588	0.633221	0.282618	0.693784	0.345954	0.613631	0.217991	0.276184	0.83945	0.112962	0.816502	0.707068	0.733689	0.397603	0.727766	0.361979	0.769366	0.731883	0.238309	0.546182	0.33148	0.824076	0.435481	0.871954	0.537517	0.71491
cg02620013	0.26202	0.204013	0.685177	0.18768	0.238736	0.147025	0.207998	0.141384	0.145185	0.270255	0.568836	0.67876	0.330114	0.168295	0.802904	0.437207	0.622676	0.136691	0.176446	0.568162	0.292991	0.167234	0.58523	0.185243	0.111219	0.400741	0.176237	0.279104	0.500078	0.515398	0.509728	0.632561	0.191295	0.447153	0.464212	0.370127	0.184634	0.717258	0.168542	0.83805	0.125224	0.660914	0.161657	0.187402	0.104473	0.118353	0.118267	0.666489	0.224237
cg18484189	0.253247	0.283718	0.495322	0.53039	0.404587	0.13421	0.771859	0.681693	0.429363	0.527012	0.231134	0.788228	0.708713	0.313735	0.113353	0.94102	0.375224	0.422365	0.666313	0.287496	0.453795	0.396399	0.687476	0.335223	0.55752	0.293267	0.547202	0.56115	0.66666	0.224237	0.352025	0.862337	0.335416	0.149259	0.360088	0.549209	0.610471	0.857538	0.845472	0.242593	0.0848004	0.331101	0.758256	0.74597	0.444706	0.494166	0.422365	0.562097	0.219362
cg12840719	0.160289	0.306135	0.392824	0.235144	0.190078	0.25831	0.286632	0.27517	0.659182	0.429183	0.762891	0.287751	0.185112	0.589807	0.598005	0.496003	0.434172	0.475411	0.260651	0.146273	0.235838	0.666489	0.181488	0.766313	0.576333	0.202365	0.146054	0.134072	0.400528	0.455438	0.160478	0.411518	0.360182	0.412371	0.188538	0.493132	0.13488	0.522732	0.71082	0.799245	0.846869	0.130507	0.71613	0.69503	0.461264	0.263277	0.731738	0.291386	0.478118
cg19954000	0.656262	0.602458	0.718801	0.0648217	0.552533	0.815754	0.487527	0.556109	0.370835	0.476461	0.377298	0.116003	0.222296	0.8525	0.129697	0.043804	0.714023	0.471811	0.201844	0.832767	0.160714	0.58971	0.220159	0.342475	0.62007	0.347392	0.390254	0.768469	0.676038	0.331763	0.276097	0.109966	0.763335	0.417513	0.62919	0.551642	0.497928	0.113584	0.201844	0.494658	0.844972	0.690111	0.182906	0.680331	0.67237	0.635333	0.351933	0.555522	0.250124
cg01281904	0.241505	0.205194	0.729203	0.548706	0.681608	0.612195	0.528815	0.415044	0.697674	0.310052	0.210055	0.479972	0.304737	0.766708	0.659997	0.0530421	0.293267	0.474598	0.356821	0.452345	0.655661	0.418687	0.717407	0.273105	0.508173	0.478646	0.645827	0.556109	0.215743	0.119706	0.450937	0.853672	0.322847	0.658371	0.566948	0.599114	0.519563	0.515902	0.371144	0.608079	0.638591	0.424602	0.380908	0.345038	0.617553	0.206637	0.541948	0.47058	0.269597
cg23418591	0.380391	0.190218	0.0652359	0.0875384	0.135452	0.514261	0.043099	0.0419884	0.446526	0.302191	0.260557	0.173413	0.160478	0.099663	0.638883	0.0715263	0.381734	0.0517141	0.1167	0.117193	0.429271	0.555308	0.0783411	0.067798	0.110041	0.110774	0.379655	0.085555	0.235395	0.055957	0.154554	0.0798118	0.342343	0.541628	0.287112	0.203663	0.167668	0.0262367	0.106653	0.533574	0.457542	0.0955253	0.560023	0.115645	0.374615	0.117347	0.820131	0.116901	0.121808
cg17631429	0.648626	0.752626	0.957	0.44927	0.406942	0.816022	0.536707	0.489716	0.449786	0.698471	0.505524	0.92332	0.929026	0.430806	0.842676	0.107272	0.83641	0.938201	0.591611	0.933522	0.915931	0.484291	0.502793	0.431688	0.463585	0.894086	0.948182	0.873697	0.620743	0.210055	0.718801	0.264486	0.712135	0.593531	0.548706	0.94483	0.749679	0.541316	0.457052	0.903317	0.300736	0.851505	0.486193	0.831339	0.937745	0.617823	0.88912	0.775277	0.879523
cg24831427	0.579526	0.37606	0.587462	0.716867	0.397089	0.446631	0.694194	0.3618	0.240558	0.328	0.498556	0.673065	0.526897	0.556109	0.699731	0.30757	0.321812	0.593318	0.600256	0.274507	0.691571	0.842309	0.828587	0.378087	0.163534	0.585698	0.214576	0.829063	0.369302	0.219851	0.686415	0.549923	0.571744	0.213821	0.513533	0.411218	0.835414	0.68781	0.295347	0.31885	0.17892	0.267426	0.552009	0.412588	0.539749	0.525477	0.164403	0.411414	0.169846
cg09076077	0.778238	0.504714	0.285207	0.518657	0.830583	0.217254	0.721157	0.816859	0.701836	0.568467	0.315101	0.825085	0.79133	0.639628	0.891785	0.429875	0.347595	0.658088	0.785827	0.404277	0.737368	0.494465	0.407455	0.493041	0.802686	0.745438	0.796251	0.657815	0.138025	0.288304	0.746995	0.834031	0.187235	0.323968	0.651595	0.825397	0.632561	0.45063	0.610942	0.615907	0.858286	0.789683	0.830965	0.545127	0.749261	0.302787	0.842719	0.655479	0.800587
cg21044104	0.596964	0.342862	0.389201	0.274135	0.543675	0.442811	0.721758	0.627526	0.441042	0.741133	0.326505	0.403144	0.286235	0.580949	0.0893752	0.326791	0.229706	0.589501	0.394574	0.754518	0.352708	0.26725	0.760065	0.429875	0.395374	0.719555	0.526501	0.802367	0.692553	0.761886	0.683103	0.357946	0.449898	0.197777	0.525477	0.652395	0.486193	0.377592	0.308066	0.280203	0.137563	0.808887	0.449786	0.678588	0.672976	0.51085	0.61314	0.822083	0.746932
cg01765641	0.788339	0.913104	0.440496	0.839011	0.490919	0.888409	0.377686	0.397286	0.622584	0.860454	0.588528	0.912529	0.65863	0.16535	0.712135	0.229617	0.452441	0.600452	0.580538	0.90964	0.940205	0.424602	0.706282	0.733602	0.544687	0.812465	0.329118	0.865724	0.501119	0.912571	0.869154	0.305414	0.627716	0.30199	0.674424	0.36713	0.622878	0.706904	0.480087	0.927705	0.934571	0.908161	0.42586	0.389836	0.743007	0.528815	0.880675	0.838345	0.351933
cg10503138	0.767945	0.336334	0.832103	0.88861	0.802792	0.232343	0.790794	0.806702	0.401614	0.722002	0.876794	0.843691	0.848002	0.118474	0.134646	0.862615	0.379655	0.808933	0.862736	0.655661	0.848295	0.203593	0.876794	0.522043	0.167295	0.882584	0.780417	0.762361	0.693864	0.479755	0.793004	0.797672	0.490018	0.317943	0.728836	0.356427	0.794368	0.571248	0.792719	0.206796	0.307968	0.679895	0.76677	0.423262	0.819458	0.395374	0.813811	0.381114	0.818797
cg18403361	0.551532	0.437998	0.671061	0.281193	0.112099	0.255955	0.669884	0.278811	0.0950742	0.782871	0.197378	0.734822	0.650318	0.131387	0.435888	0.069234	0.142111	0.26257	0.265218	0.592947	0.327709	0.225581	0.449565	0.496979	0.0295305	0.799364	0.0863457	0.068801	0.265123	0.737433	0.806807	0.332345	0.114316	0.294884	0.207998	0.193136	0.169512	0.165968	0.129233	0.186516	0.343447	0.841388	0.18169	0.194129	0.431025	0.117743	0.268132	0.793566	0.712284
cg26668713	0.0149607	0.023536	0.0358973	0.0152315	0.00963423	0.0352818	0.0204071	0.0511145	0.015554	0.0539929	0.0116254	0.0309571	0.0311586	0.795532	0.53081	0.0268375	0.0265565	0.021623	0.016959	0.0183523	0.0193104	0.541948	0.0164098	0.144578	0.0158174	0.0305397	0.0341811	0.0177036	0.0362329	0.02372	0.0223275	0.0483147	0.0835335	0.0161321	0.0273254	0.0190268	0.56786	0.0953137	0.0235415	0.0270036	0.714396	0.0122461	0.0167823	0.0130941	0.0163123	0.0689901	0.412898	0.079439	0.0502647
cg18463686	0.674662	0.75035	0.185243	0.747146	0.643446	0.177971	0.537721	0.660177	0.471707	0.692473	0.211125	0.638784	0.724022	0.633398	0.803932	0.802146	0.336108	0.757514	0.750291	0.574733	0.33852	0.129329	0.372718	0.475928	0.727618	0.666223	0.795231	0.629747	0.156907	0.640663	0.471489	0.796484	0.325896	0.510335	0.453074	0.600561	0.407639	0.781959	0.800587	0.205357	0.1948	0.786078	0.774397	0.175832	0.675255	0.462582	0.531874	0.82442	0.707544
cg23968383	0.70539	0.444806	0.379317	0.862165	0.264486	0.423567	0.390052	0.339226	0.397603	0.837153	0.380492	0.80498	0.771993	0.229974	0.833185	0.159202	0.36713	0.902537	0.313249	0.559826	0.846041	0.303589	0.784634	0.439871	0.235753	0.706194	0.402325	0.812307	0.273011	0.243625	0.693041	0.890608	0.52474	0.360088	0.371451	0.320022	0.363746	0.390052	0.473689	0.208776	0.420292	0.455868	0.282618	0.389201	0.357841	0.509728	0.254675	0.852355	0.538568
cg17923358	0.0649959	0.543355	0.0540506	0.0206654	0.0658269	0.536102	0.0419817	0.0951588	0.0916656	0.150013	0.129554	0.193059	0.136448	0.134256	0.273938	0.376475	0.681946	0.0303742	0.0910443	0.0674719	0.0580244	0.467888	0.0918803	0.0789713	0.0482442	0.066351	0.0652983	0.0951588	0.0922044	0.122923	0.467253	0.233671	0.082269	0.790767	0.104537	0.0710318	0.129001	0.053529	0.02492	0.0470977	0.585506	0.129094	0.053852	0.0547377	0.0432902	0.0592751	0.0569878	0.0981006	0.0576529
cg07465609	0.878867	0.907345	0.625138	0.756114	0.88347	0.632189	0.772381	0.812465	0.614973	0.88662	0.871436	0.842122	0.907653	0.320711	0.869585	0.712847	0.616407	0.761953	0.907516	0.805829	0.885693	0.321119	0.797003	0.80081	0.244539	0.907386	0.351072	0.77726	0.81729	0.784394	0.895351	0.782578	0.82708	0.428038	0.784079	0.345742	0.861581	0.474259	0.547603	0.281926	0.373668	0.819864	0.71082	0.392202	0.725716	0.644532	0.832523	0.689046	0.894539
cg20322862	0.290901	0.811476	0.281381	0.861836	0.858406	0.765846	0.353326	0.563807	0.871733	0.593318	0.595322	0.55044	0.712135	0.761817	0.87969	0.913151	0.839325	0.575329	0.845642	0.749261	0.638405	0.872694	0.812783	0.916899	0.6715	0.492112	0.880352	0.533677	0.809742	0.884727	0.405191	0.715204	0.770329	0.678261	0.862656	0.328599	0.772765	0.618782	0.417034	0.907819	0.912106	0.569795	0.623636	0.897729	0.908471	0.872905	0.894985	0.249414	0.564024
cg02330106	0.663745	0.841982	0.496698	0.827661	0.329414	0.858832	0.577465	0.334082	0.474804	0.326109	0.316108	0.429183	0.596608	0.883152	0.919459	0.183181	0.562298	0.772447	0.53081	0.612483	0.59492	0.69981	0.804862	0.447852	0.0931586	0.568467	0.386828	0.495538	0.256214	0.84872	0.777005	0.402726	0.871522	0.220982	0.273938	0.192252	0.730722	0.420698	0.281113	0.201317	0.922692	0.788059	0.533772	0.345447	0.300169	0.534356	0.176679	0.520473	0.528505
cg20713492	0.0517603	0.173481	0.186951	0.360582	0.599114	0.582821	0.453074	0.610276	0.34153	0.050013	0.185967	0.142269	0.235306	0.557007	0.054082	0.324244	0.175291	0.0205192	0.317077	0.186881	0.359057	0.556878	0.359362	0.161007	0.611523	0.0687479	0.683767	0.205194	0.699656	0.734888	0.0426435	0.618614	0.127818	0.179991	0.496698	0.652317	0.360495	0.536517	0.663575	0.588828	0.118566	0.042055	0.0960269	0.586798	0.483232	0.557807	0.348522	0.0434509	0.575137
cg13594711	0.674022	0.75671	0.657638	0.495538	0.897438	0.30881	0.780355	0.734227	0.41565	0.905415	0.225412	0.542451	0.298392	0.509197	0.915074	0.543675	0.870233	0.586604	0.333212	0.821722	0.570734	0.437684	0.290705	0.689046	0.710898	0.367348	0.603227	0.804416	0.624019	0.897897	0.887238	0.26574	0.87944	0.445565	0.573504	0.398148	0.516323	0.421615	0.259107	0.686994	0.874181	0.647258	0.490804	0.229791	0.672029	0.86653	0.813663	0.824665	0.653124
cg23873703	0.851644	0.447039	0.523922	0.368691	0.415142	0.714251	0.816448	0.365141	0.553347	0.874598	0.613336	0.911637	0.952399	0.170485	0.616114	0.24029	0.453679	0.524234	0.733215	0.778548	0.449363	0.334082	0.836236	0.49384	0.275356	0.692809	0.322754	0.725789	0.239716	0.304922	0.851337	0.356524	0.584221	0.272369	0.570308	0.343447	0.370236	0.227481	0.447945	0.189875	0.513533	0.814114	0.389836	0.419551	0.88965	0.402436	0.164202	0.727542	0.414031
cg22024657	0.947277	0.905899	0.636545	0.945452	0.844404	0.529961	0.938804	0.899243	0.690738	0.961696	0.711665	0.951966	0.958996	0.595712	0.925674	0.941482	0.89379	0.926011	0.953363	0.937244	0.956452	0.309588	0.901333	0.475627	0.681864	0.977876	0.472128	0.938852	0.884937	0.80047	0.960301	0.734155	0.718882	0.399168	0.780674	0.497711	0.931565	0.922419	0.926352	0.552327	0.574933	0.958261	0.79879	0.415354	0.918268	0.728052	0.329508	0.950392	0.84409
cg27257987	0.657815	0.868135	0.74597	0.706664	0.655207	0.691395	0.847829	0.925824	0.746509	0.617823	0.470997	0.487953	0.344229	0.452854	0.921733	0.792834	0.45134	0.750895	0.785342	0.724849	0.44724	0.749324	0.80047	0.550333	0.767945	0.724488	0.860104	0.718725	0.704742	0.791631	0.308066	0.81457	0.819553	0.466245	0.464935	0.538149	0.741784	0.770128	0.814163	0.75397	0.51643	0.539361	0.552327	0.827988	0.801147	0.387766	0.839862	0.836031	0.548706
cg00042156	0.639362	0.514045	0.797138	0.418595	0.604867	0.210744	0.517163	0.18915	0.575722	0.372927	0.556677	0.223061	0.173481	0.818453	0.127438	0.303183	0.662065	0.266444	0.538247	0.696091	0.485241	0.914813	0.55951	0.729338	0.586089	0.492837	0.566641	0.696864	0.792719	0.490399	0.252907	0.574733	0.839141	0.698471	0.60895	0.80525	0.460329	0.758198	0.766441	0.618323	0.16359	0.622406	0.358955	0.743972	0.826853	0.313458	0.767812	0.409197	0.525477
cg25350411	0.513953	0.422598	0.348947	0.489394	0.243356	0.515804	0.272547	0.552327	0.266721	0.536614	0.610276	0.421824	0.697187	0.394044	0.487418	0.65819	0.296471	0.763335	0.246169	0.483656	0.48312	0.151673	0.606294	0.735763	0.93139	0.611621	0.310735	0.479542	0.539556	0.466551	0.531438	0.55407	0.36028	0.465535	0.565744	0.828198	0.336639	0.478412	0.726028	0.328	0.572008	0.454083	0.604493	0.682692	0.777876	0.331195	0.133411	0.842495	0.381848
cg19486673	0.317345	0.167742	0.0980682	0.682178	0.545563	0.0997588	0.40294	0.188816	0.421205	0.284076	0.345544	0.463384	0.644987	0.109712	0.291296	0.0612395	0.213651	0.466051	0.716211	0.249143	0.516868	0.380808	0.150969	0.155343	0.42596	0.622303	0.19419	0.298786	0.166983	0.689134	0.332638	0.620536	0.0607764	0.223244	0.368804	0.194958	0.361979	0.568935	0.534448	0.0817707	0.21128	0.392412	0.723415	0.184018	0.453468	0.538149	0.202445	0.485241	0.432005
cg06256735	0.703463	0.73232	0.318654	0.479044	0.156775	0.806702	0.16535	0.507863	0.661468	0.625505	0.35468	0.23618	0.781138	0.299533	0.0744282	0.0383376	0.724192	0.294228	0.441142	0.781556	0.724022	0.726405	0.390644	0.581652	0.565459	0.713537	0.394365	0.168606	0.412685	0.716298	0.551532	0.524334	0.767094	0.350065	0.526897	0.657349	0.289061	0.674263	0.178376	0.735233	0.157871	0.374822	0.280013	0.634041	0.444592	0.342032	0.877863	0.299254	0.57321
cg19105504	0.581248	0.801978	0.299533	0.336729	0.191725	0.403976	0.366925	0.566434	0.25803	0.7868	0.15268	0.664384	0.390855	0.182906	0.624112	0.0541901	0.285113	0.808302	0.464844	0.534152	0.541519	0.871954	0.241168	0.188385	0.801147	0.592947	0.822751	0.571043	0.140052	0.333304	0.821079	0.340122	0.744402	0.364367	0.130507	0.502516	0.285113	0.401388	0.664016	0.0452386	0.138025	0.743551	0.554378	0.235753	0.293085	0.178848	0.779176	0.342343	0.541837
cg24743310	0.900036	0.704256	0.58588	0.302787	0.48568	0.847057	0.406311	0.370553	0.556208	0.912068	0.53338	0.226587	0.34977	0.26681	0.455868	0.281835	0.599772	0.501446	0.444095	0.791805	0.391775	0.273498	0.445229	0.528815	0.566545	0.460329	0.508978	0.856465	0.608269	0.51282	0.838473	0.283335	0.709291	0.391566	0.282118	0.43498	0.589121	0.373508	0.525803	0.596873	0.882869	0.853885	0.372298	0.522624	0.516117	0.456508	0.852146	0.873415	0.766708
cg02452985	0.0102662	0.589218	0.609038	0.00801405	0.018087	0.00951261	0.0091869	0.0177891	0.0373368	0.0198822	0.551917	0.541519	0.0231583	0.0134399	0.647528	0.43632	0.845955	0.0427529	0.0231559	0.609038	0.0302652	0.0204923	0.0392907	0.0304681	0.0106176	0.0210935	0.0184691	0.0130252	0.0159873	0.744543	0.0146933	0.0124865	0.596502	0.0248782	0.0201656	0.0182679	0.0486303	0.0104179	0.00826973	0.0580137	0.147741	0.0136456	0.0176081	0.0108689	0.0183474	0.0252603	0.0100889	0.108595	0.541413
cg01443630	0.570636	0.52537	0.476574	0.562502	0.55044	0.29281	0.907819	0.486925	0.833506	0.620743	0.473916	0.505524	0.66215	0.821434	0.364367	0.389305	0.364056	0.863668	0.520968	0.507355	0.773067	0.879764	0.737169	0.466341	0.137807	0.437391	0.305601	0.705713	0.433946	0.792434	0.702075	0.91147	0.606507	0.75631	0.818259	0.724269	0.91797	0.874768	0.712284	0.370553	0.50713	0.410076	0.588148	0.590994	0.529853	0.488178	0.403774	0.659812	0.225334
cg23216015	0.334273	0.465843	0.15034	0.723108	0.308245	0.118526	0.751402	0.631994	0.289633	0.498035	0.146815	0.543675	0.562598	0.611808	0.30425	0.49182	0.469243	0.594507	0.761252	0.298786	0.503913	0.113624	0.756182	0.23218	0.718644	0.360875	0.683262	0.636545	0.563807	0.625222	0.271349	0.657445	0.541734	0.497821	0.67751	0.750153	0.626447	0.604582	0.252282	0.282789	0.0921452	0.466757	0.727901	0.260946	0.831626	0.317256	0.695109	0.486925	0.456293
[truncated: 4,134 more rows]
[truncated: 85 more columns]
