# Supplementary material for: HOTAIR and its surrogate DNA methylation signature indicate carboplatin resistance in ovarian cancer
Source: Genome Med. 2015 Oct 24;7:108. doi: 10.1186/s13073-015-0233-4 (PMC4619324; doi:10.1186/s13073-015-0233-4)
Supplement: Additional file 15: — Performance of the DNAme signature in the primary INNSBRUCK carboplatin-treated ovarian cancer set and TCGA set. (PDF 215 kb) [file 13073_2015_233_MOESM15_ESM.pdf]

**Additional data file 15A. DNAME signature in primary Carboplatin-treated “INNSBRUCK” ovarian cancer set (n=63).** Cox-regression Hazard ratio (with 95% confidence intervals), likelihood ratio test P-value, and number of data values, for various predictive factors in the subset of 63 Carboplatin treated ovarian cancer patients, using the full follow-up period (maximum 17 years) and for the case of a 5 year observation window (all events censored at 5 years). *HOTAIR*-DNAME-multivariate denotes multivariate analysis adjusted for age, stage and size of residual tumor.

<sup>†</sup> *HOTAIR* DNAME correlation score was used (not the binarised score).

<sup>\$</sup> *HOTAIR* DNAME correlation score was binarised into high and low groups according to a cut-off value as described in Supplementary Methods.

| Factor                                             | Full period      |                  |    | <5 yrs           |                  |    |
|----------------------------------------------------|------------------|------------------|----|------------------|------------------|----|
|                                                    | HR (95%CI)       | P                | n  | HR (95%CI)       | P                | n  |
| Age                                                | 1.51 (1.11-2.05) | <b>0.008</b>     | 63 | 1.70 (1.18-2.47) | <b>0.003</b>     | 63 |
| Stage                                              | 1.88 (1.28-2.77) | <b>0.001</b>     | 63 | 1.88 (1.20-2.96) | <b>0.005</b>     | 63 |
| Grade                                              | 1.39 (0.79-2.46) | 0.25             | 59 | 1.01 (0.53-1.93) | 0.98             | 59 |
| Residual Tumor                                     | 3.06 (1.90-4.93) | <b>&lt;0.001</b> | 60 | 3.18 (1.85-5.46) | <b>&lt;0.001</b> | 60 |
| <i>HOTAIR</i> -DNAME <sup>†</sup>                  | 1.56 (1.18-2.07) | <b>0.001</b>     | 63 | 1.76 (1.27-2.45) | <b>&lt;0.001</b> | 63 |
| <i>HOTAIR</i> -DNAME <sup>\$</sup>                 | 2.34 (1.29-4.26) | <b>0.004</b>     | 63 | 3.07 (1.49-6.31) | <b>0.001</b>     | 63 |
| <i>HOTAIR</i> -DNAME <sup>†</sup><br>multivariate  | 1.54 (1.09-2.17) | <b>0.01</b>      | 60 | 1.72 (1.14-2.59) | <b>0.009</b>     | 60 |
| <i>HOTAIR</i> -DNAME <sup>\$</sup><br>multivariate | 2.35 (1.19-4.63) | <b>0.01</b>      | 60 | 2.76 (1.24-6.18) | <b>0.01</b>      | 60 |

**Additional data file 15B. DNAm signature in the independent “TCGA” set (n=316; Carboplatin based treatment; excluding Cisplatin treated patients).** Cox-regression Hazard ratio (with 95% confidence intervals), likelihood ratio test P-value, and number of data values, for various predictive factors in the TCGA set, using the full follow-up period (maximum 10.8 years) and for the case of maximum 5 years follow-up period (all observations after 5 years are censored at 5 years). *HOTAIR*-DNAm-multivariate denotes multivariate analysis adjusted for age, stage and size of residual tumor (full period) and for age, stage, grade and size of residual tumor for 5 year observation window. All Cox-regressions were stratified by the medical health center the patients came from to account for inter-center differences in survival distributions.

<sup>†</sup> *HOTAIR* DNAm correlation score was used (not the binarised score).

<sup>\$</sup> *HOTAIR* DNAm correlation score was binarised into high and low groups according to a cut-off value as described in Supplementary Methods.

|                                                | Full period      |                  |     | <5 yrs           |                    |     |
|------------------------------------------------|------------------|------------------|-----|------------------|--------------------|-----|
| Factor                                         | HR (95%CI)       | P                | n   | HR (95%CI)       | P                  | n   |
| Age                                            | 1.20 (1.00-1.43) | 0.05             | 275 | 1.27 (1.05-1.53) | <b>0.01</b>        | 275 |
| Stage                                          | 1.70 (1.12-2.56) | <b>0.012</b>     | 275 | 1.54 (1.00-2.38) | <b>0.05</b>        | 275 |
| Grade                                          | 1.23 (0.71-2.12) | 0.46             | 268 | 1.65 (0.87-3.10) | <b>0.12</b>        | 268 |
| Residual Tumor                                 | 1.39 (0.98-1.96) | <b>0.062</b>     | 246 | 1.29 (0.91-1.85) | <b>0.16</b>        | 246 |
| <i>HOTAIR</i> -DNAm <sup>†</sup>               | 1.44 (1.19-1.73) | <b>&lt;0.001</b> | 275 | 1.55 (1.27-1.88) | <b>&lt;0.00001</b> | 275 |
| <i>HOTAIR</i> -DNAm <sup>\$</sup>              | 1.49 (1.07-2.10) | <b>0.02</b>      | 275 | 1.77 (1.22-2.58) | <b>0.003</b>       | 275 |
| <i>HOTAIR</i> -DNAm <sup>†</sup> multivariate  | 1.32 (1.07-1.61) | <b>0.01</b>      | 246 | 1.45 (1.17-1.80) | <b>&lt;0.001</b>   | 241 |
| <i>HOTAIR</i> -DNAm <sup>\$</sup> multivariate | 1.68 (1.10-2.56) | <b>0.02</b>      | 241 | 1.91 (1.23-2.98) | <b>0.004</b>       | 241 |
