# Supplementary material for: HOTAIR and its surrogate DNA methylation signature indicate carboplatin resistance in ovarian cancer
Source: Springer Nature journal article supplement (doi:10.1186/s13073-015-0233-4), 2015-10-24
Supplement: MOESM2 [file 13073_2015_233_MOESM2_ESM.pdf]

**Additional data file 2. Clinicopathological characteristics of ovarian cancer patients (“INNSBRUCK”) for which *HOTAIR* expression and DNAm has been done (n=134).**

Patients are stratified into patients who did not receive Carboplatin (16 did not receive chemotherapy and 55 received Cisplatin/Cyclophosphamide based chemotherapy) and who did receive Carboplatin-based chemotherapy (34 single agent and 29 in combination with Paclitaxel)

| Characteristics                       | n  | Chemotherapy treatment     |                         | P     |
|---------------------------------------|----|----------------------------|-------------------------|-------|
|                                       |    | no Carboplatin<br>(n = 71) | Carboplatin<br>(n = 63) |       |
| <b>Age</b>                            |    |                            |                         |       |
| ≤ 62.7 yrs. (median age)              | 67 | 40                         | 27                      | 0.119 |
| > 62.7 yrs. (median age)              | 67 | 31                         | 36                      |       |
| <b>FIGO</b>                           |    |                            |                         |       |
| I/II                                  | 37 | 23                         | 14                      | 0.189 |
| III/IV                                | 97 | 48                         | 49                      |       |
| <b>Tumor grade</b>                    |    |                            |                         |       |
| I/II                                  | 78 | 46                         | 32                      | 0.134 |
| III                                   | 51 | 24                         | 27                      |       |
| Unknown                               | 5  | 1                          | 4                       |       |
| <b>Histology</b>                      |    |                            |                         |       |
| serous cancer                         | 56 | 36                         | 20                      | 0.210 |
| mucinous cancer                       | 43 | 22                         | 21                      |       |
| endometrioid cancer                   | 24 | 8                          | 16                      |       |
| clear cell cancer                     | 6  | 3                          | 3                       |       |
| Other                                 | 2  | 1                          | 1                       |       |
| Fallopian tube cancer                 | 3  | 1                          | 2                       |       |
| <b>Residual disease after surgery</b> |    |                            |                         |       |
| no residual disease                   | 46 | 29                         | 17                      | 0.351 |
| residual disease ≤ 2cm                | 36 | 16                         | 20                      |       |
| residual disease > 2cm                | 45 | 22                         | 23                      |       |
| Unknown                               | 7  | 4                          | 3                       |       |
| <b><i>HOTAIR</i> expression</b>       |    |                            |                         |       |
| Yes                                   | 72 | 37                         | 35                      | 0.731 |
| No                                    | 62 | 34                         | 28                      |       |
| <b>Health status*</b>                 |    |                            |                         |       |
| no relapse                            | 56 | 31                         | 25                      | 0.641 |

|                         |    |    |    |       |
|-------------------------|----|----|----|-------|
| Relapse                 | 78 | 40 | 38 |       |
| <b>Survival status*</b> |    |    |    |       |
| Alive                   | 39 | 22 | 17 | 0.611 |
| Dead                    | 95 | 49 | 46 |       |

---

*Note:* The significance level (P) was determined by Chi square test.  
\* for the entire follow up period.
