# Supplementary material for: HOTAIR and its surrogate DNA methylation signature indicate carboplatin resistance in ovarian cancer
Source: Springer Nature journal article supplement (doi:10.1186/s13073-015-0233-4), 2015-10-24
Supplement: MOESM4 [file 13073_2015_233_MOESM4_ESM.pdf]

**Additional data file 4. Clinicopathological features of patients (“GRONINGEN”) stratified according to *HOTAIR* expression.**

| Characteristics                       | <i>HOTAIR</i> RNA expression |                       | P Value * |
|---------------------------------------|------------------------------|-----------------------|-----------|
|                                       | negative<br>(n = 58)         | positive<br>(n = 117) |           |
| <b>Age</b>                            |                              |                       | 0.262     |
| ≤ 62.7 yrs. (median age)              | 87                           | 25                    | 62        |
| > 62.7 yrs. (median age)              | 88                           | 33                    | 55        |
| <b>FIGO</b>                           |                              |                       | 0.665     |
| III                                   | 147                          | 50                    | 97        |
| IV                                    | 28                           | 8                     | 20        |
| <b>Tumor grade</b>                    |                              |                       | 0.483     |
| I/II                                  | 59                           | 17                    | 42        |
| III                                   | 97                           | 34                    | 63        |
| Unknown                               | 19                           | 7                     | 12        |
| <b>Histology</b>                      |                              |                       | 0.988     |
| serous cancer                         | 118                          | 39                    | 79        |
| mucinous cancer                       | 15                           | 5                     | 10        |
| endometrioid cancer                   | 14                           | 5                     | 9         |
| clear cell cancer                     | 8                            | 2                     | 6         |
| Others                                | 20                           | 7                     | 13        |
| <b>Residual disease after surgery</b> |                              |                       | 0.161     |
| no residual disease                   | 29                           | 8                     | 21        |
| residual disease ≤ 2cm                | 38                           | 18                    | 20        |
| residual disease > 2cm                | 97                           | 31                    | 66        |
| Unknown                               | 11                           | 1                     | 10        |
| <b>Chemotherapy**</b>                 |                              |                       | 0.999     |
| Cisplatin based                       | 18                           | 6                     | 12        |
| Carboplatin based                     | 157                          | 52                    | 105       |
| <b>Survival status (5 years)</b>      |                              |                       | 0.066     |
| Alive                                 | 61                           | 26                    | 35        |
| Dead                                  | 114                          | 32                    | 82        |

\* P values were calculated with the use of the Chi square test.

\*\* 98 and 59 patients received Carboplatin in combination with Cyclophosphamide and Paclitaxel, respectively; 10 and 8 patients received Cisplatin in combination with Cyclophosphamide and Paclitaxel, respectively.
