# Supplementary material for: HOTAIR and its surrogate DNA methylation signature indicate carboplatin resistance in ovarian cancer
Source: Springer Nature journal article supplement (doi:10.1186/s13073-015-0233-4), 2015-10-24
Supplement: MOESM5 [file 13073_2015_233_MOESM5_ESM.pdf]

**Additional data file 5. Clinicopathological characteristics of ovarian cancer patients (“TCGA”).** Patients are stratified into patients who did receive Cisplatin-based chemotherapy (n=26) or received Carboplatin (Carboplatin-Monotherapy or combination Carboplatin/Cisplatin; n=316).

| Characteristics                       | n   | Chemotherapy treatment |                          | P     |
|---------------------------------------|-----|------------------------|--------------------------|-------|
|                                       |     | Cisplatin<br>(n = 26)  | Carboplatin<br>(n = 316) |       |
| <b>Age</b>                            |     |                        |                          | 0.535 |
| ≤ 57 yrs. (median age)                | 148 | 14                     | 134                      |       |
| > 57 yrs. (median age)                | 152 | 11                     | 141                      |       |
| Unknown                               | 42  |                        |                          |       |
| <b>FIGO</b>                           |     |                        |                          | 1.000 |
| II                                    | 15  | 1                      | 14                       |       |
| III/IV                                | 326 | 25                     | 301                      |       |
| Unknown                               | 1   |                        |                          |       |
| <b>Tumor grade</b>                    |     |                        |                          | 0.091 |
| I/II                                  | 33  | 0                      | 33                       |       |
| III                                   | 301 | 26                     | 275                      |       |
| Unknown                               | 8   |                        |                          |       |
| <b>Histology</b>                      |     |                        |                          | NA    |
| serous cancer                         | 341 | 26                     | 315                      |       |
| Unknown                               | 1   |                        |                          |       |
| <b>Residual disease after surgery</b> |     |                        |                          | 0.006 |
| no residual disease                   | 58  | 10                     | 48                       |       |
| residual disease ≤ 2cm                | 189 | 11                     | 178                      |       |
| residual disease > 2cm                | 60  | 2                      | 58                       |       |
| Unknown                               | 35  |                        |                          |       |
| <b>HOTAIR DNAm</b>                    |     |                        |                          | 1.000 |
| High                                  | 224 | 17                     | 207                      |       |
| Low                                   | 118 | 9                      | 109                      |       |
| <b>Survival status</b>                |     |                        |                          | 0.001 |
| Alive                                 | 217 | 24                     | 193                      |       |
| Dead                                  | 124 | 2                      | 122                      |       |
| Unknown                               | 1   |                        |                          |       |

Note: The significance level (P) was determined by Chi square test.
