# Supplementary material for: HOTAIR and its surrogate DNA methylation signature indicate carboplatin resistance in ovarian cancer
Source: Springer Nature journal article supplement (doi:10.1186/s13073-015-0233-4), 2015-10-24
Supplement: MOESM6 [file 13073_2015_233_MOESM6_ESM.pdf]

**Additional data file 6. Clinicopathological characteristics of ovarian cancer patients (“EUROPE”).** Patients are stratified into patients who did receive Cisplatin-based chemotherapy (n=85) or received Carboplatin-based chemotherapy (n=121).

| Characteristics                       | n   | Chemotherapy treatment |                          | P     |
|---------------------------------------|-----|------------------------|--------------------------|-------|
|                                       |     | Cisplatin<br>(n = 85)  | Carboplatin<br>(n = 121) |       |
| <b>Age</b>                            |     |                        |                          | 0.001 |
| ≤ 57 yrs. (median age)                | 97  | 54                     | 43                       |       |
| > 57 yrs. (median age)                | 109 | 31                     | 78                       |       |
| <b>FIGO</b>                           |     |                        |                          | 0.431 |
| II                                    | 31  | 15                     | 16                       |       |
| III/IV                                | 175 | 70                     | 105                      |       |
| <b>Tumor grade</b>                    |     |                        |                          | 0.045 |
| I/II                                  | 63  | 33                     | 30                       |       |
| III                                   | 143 | 52                     | 91                       |       |
| <b>Histology</b>                      |     |                        |                          | 0.001 |
| serous cancer                         | 165 | 61                     | 104                      |       |
| mucinous cancer                       | 6   | 3                      | 3                        |       |
| endometrioid cancer                   | 15  | 4                      | 11                       |       |
| clear cell cancer                     | 13  | 11                     | 2                        |       |
| undifferentiated                      | 7   | 6                      | 1                        |       |
| <b>Residual disease after surgery</b> |     |                        |                          | 0.044 |
| no residual disease                   |     | 43                     | 79                       |       |
| residual disease present              |     | 42                     | 42                       |       |
| <b>HOTAIR DNAm</b>                    |     |                        |                          | 0.774 |
| High                                  | 124 | 50                     | 74                       |       |
| Low                                   | 82  | 35                     | 47                       |       |
| <b>Survival status*</b>               |     |                        |                          | 1.000 |
| Alive                                 | 81  | 33                     | 48                       |       |
| Dead                                  | 124 | 51                     | 73                       |       |
| Unknown                               | 1   |                        |                          |       |

Note: The significance level (P) was determined by Chi square test.

\* the log-rank P value (Kaplan Meier statistics; comparing 5 year survival between Carboplatin and Cisplatin treated patients) = 0.900.
