# Supplementary material for: HOTAIR and its surrogate DNA methylation signature indicate carboplatin resistance in ovarian cancer
Source: Springer Nature journal article supplement (doi:10.1186/s13073-015-0233-4), 2015-10-24
Supplement: MOESM8 [file 13073_2015_233_MOESM8_ESM.pdf]

**Additional data file 8. Hazard Ratios for Relapse and Death. (A)** Patients with Carboplatin treatment **(B)** patients without Carboplatin treatment (“INNSBRUCK” set).

**A**

| Characteristics                                                 | Relapse                  |                   | Death                    |                   |
|-----------------------------------------------------------------|--------------------------|-------------------|--------------------------|-------------------|
|                                                                 | Hazard Ratio<br>(95% CI) | P<br>Value*       | Hazard Ratio<br>(95% CI) | P<br>Value*       |
| <b>Age</b><br>> 62.7 yrs. Vs <62.7 yrs.                         | 1.11 (0.59-2.11)         | 0.745             | 1.80 (0.99-3.28)         | 0.055             |
| <b>FIGO stage</b><br>III/IV vs I/II                             | 9.28 (2.21-38.86)        | <b>0.002</b>      | 4.41 (1.73-11.26)        | <b>0.002</b>      |
| <b>Tumor grade</b><br>III vs. I/II                              | 1.25 (0.64-2.43)         | 0.509             | 1.32 (0.72-2.42)         | 0.371             |
| <b>Residual disease after surgery</b><br>disease vs. no disease | 3.02 (1.25-7.31)         | <b>0.014</b>      | 2.76 (1.28-5.98)         | <b>0.010</b>      |
| <b>Histology</b><br>non-serous vs. Serous                       | 0.59 (0.31-1.15)         | 0.120             | 0.61 (0.34-1.11)         | 0.108             |
| <b>HOTAIR RNA expression</b><br>pos. vs neg.                    | 4.46 (2.14-9.31)         | <b>&lt; 0.001</b> | 4.02 (2.11-7.64)         | <b>&lt; 0.001</b> |
| <b>HOTAIR multivariate**</b><br>pos. vs neg.                    | 3.38 (1.53-7.44)         | <b>0.003</b>      | 3.64 (1.78-7.42)         | <b>&lt;0.001</b>  |

**B**

| Characteristics                                                 | Relapse                  |              | Death                    |              |
|-----------------------------------------------------------------|--------------------------|--------------|--------------------------|--------------|
|                                                                 | Hazard Ratio<br>(95% CI) | P<br>Value*  | Hazard Ratio<br>(95% CI) | P<br>Value*  |
| <b>Age</b><br>> 62.7 yrs. Vs <62.7 yrs.                         | 1.34 (0.70-2.55)         | 0.375        | 2.05 (1.17-3.60)         | 0.012        |
| <b>FIGO stage</b><br>III/IV vs I/II                             | 2.25 (0.99-5.09)         | 0.053        | 1.62 (0.86-3.07)         | 0.136        |
| <b>Tumor grade</b><br>III vs. I/II                              | 2.70 (1.43-5.11)         | <b>0.002</b> | 1.93 (1.08-3.47)         | <b>0.027</b> |
| <b>Residual disease after surgery</b><br>disease vs. no disease | 3.10 (1.45-6.62)         | <b>0.003</b> | 2.47 (1.31-4.67)         | <b>0.005</b> |
| <b>Histology</b><br>non-serous vs. Serous                       | 0.54 (0.29-1.03)         | 0.063        | 0.90 (0.51-1.58)         | 0.712        |
| <b>HOTAIR RNA expression</b><br>pos. vs neg.                    | 0.99 (0.53-1.84)         | 0.966        | 0.92 (0.52-1.62)         | 0.774        |
| <b>HOTAIR multivariate**</b><br>pos. vs neg.                    | 1.13 (0.57-2.23)         | 0.722        | 0.97 (0.52-1.80)         | 0.932        |

\* P values were calculated using Cox-Regression

\*\* multivariate analysis included stage, grade, residual disease and *HOTAIR*
