# Supplementary material for: HOTAIR and its surrogate DNA methylation signature indicate carboplatin resistance in ovarian cancer
Source: Springer Nature journal article supplement (doi:10.1186/s13073-015-0233-4), 2015-10-24
Supplement: MOESM9 [file 13073_2015_233_MOESM9_ESM.pdf]

**Additional data file 9. Hazard Ratios (HR) for death of patients who received Carboplatin-based treatment in the “GRONINGEN” Set and had RNA available to analyze *HOTAIR* (n=157).** Hazard ratio (with 95% confidence intervals), likelihood ratio test P-value, and number of data values, for various predictive factors in the Groningen set for a follow up period of 5 years (no patients were followed up for more than 5 years). *HOTAIR*-multivariate denotes multivariate analysis adjusted for stage and size of residual tumor.

| Factor                                | 5 yrs            |                  |     |
|---------------------------------------|------------------|------------------|-----|
|                                       | HR (95%CI)       | P                | n   |
| Age                                   | 1.01 (0.99-1.02) | 0.389            | 170 |
| Stage                                 | 2.08 (1.33-3.25) | <b>0.001</b>     | 170 |
| Grade                                 | 1.15 (0.86-1.54) | 0.333            | 151 |
| Residual Tumor                        | 1.79 (1.34-2.39) | <b>&lt;0.001</b> | 158 |
| <i>HOTAIR</i> positivity              | 1.86 (1.21-2.88) | <b>0.004</b>     | 157 |
| <i>HOTAIR</i> positivity multivariate | 1.63 (1.04-2.56) | <b>0.032</b>     | 146 |
