# Supplementary material for: HOTAIR and its surrogate DNA methylation signature indicate carboplatin resistance in ovarian cancer
Source: Springer Nature journal article supplement (doi:10.1186/s13073-015-0233-4), 2015-10-24

**(A)**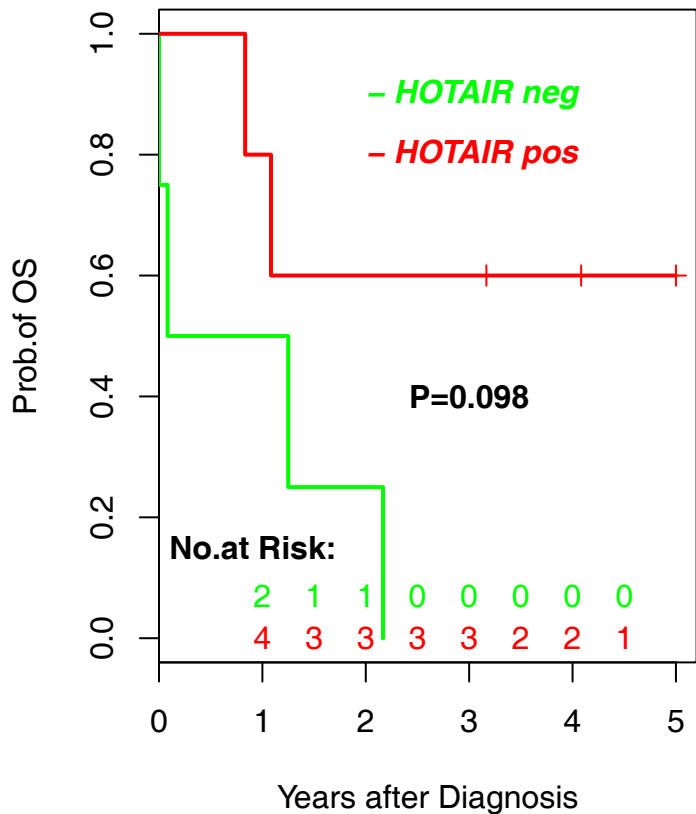**(B)**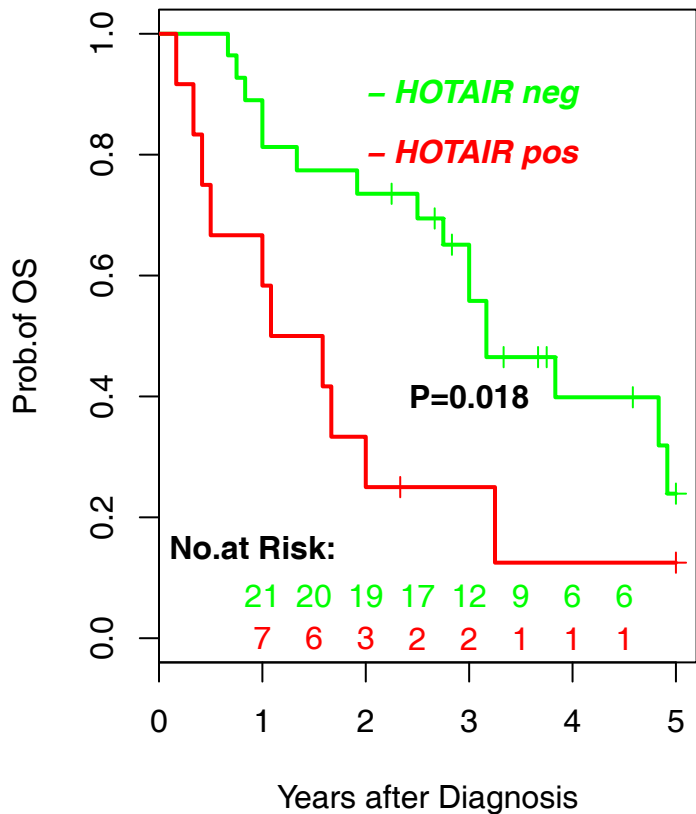

Supplement: MOESM10 [file 13073_2015_233_MOESM10_ESM.pdf]
