# Supplementary material for: HOTAIR and its surrogate DNA methylation signature indicate carboplatin resistance in ovarian cancer
Source: Springer Nature journal article supplement (doi:10.1186/s13073-015-0233-4), 2015-10-24

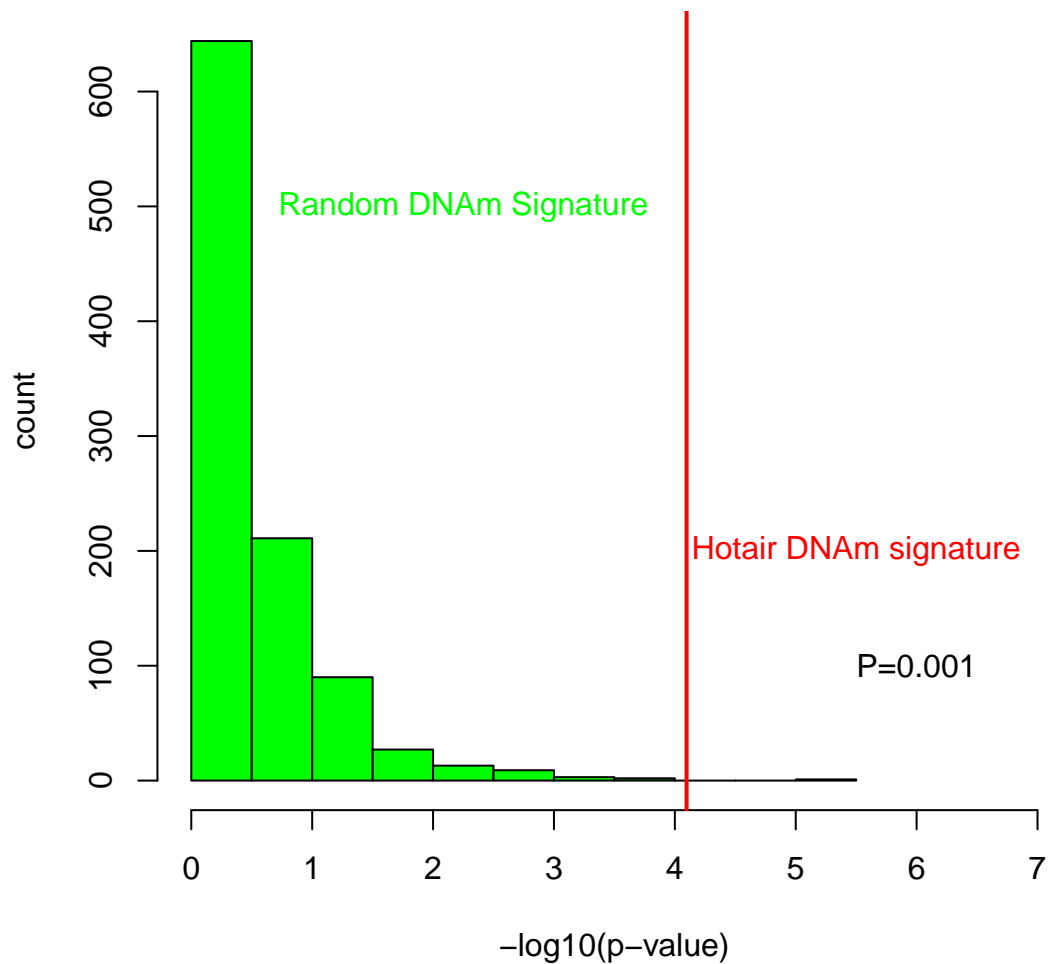

Supplement: MOESM17 [file 13073_2015_233_MOESM17_ESM.pdf]
