# Supplementary material for: HOTAIR and its surrogate DNA methylation signature indicate carboplatin resistance in ovarian cancer
Source: Springer Nature journal article supplement (doi:10.1186/s13073-015-0233-4), 2015-10-24
Supplement: MOESM18 [file 13073_2015_233_MOESM18_ESM.pdf]

**Additional data file 18A. DNAm signature in the Carboplatin treated “EUROPE” set (n=121).** Cox-regression Hazard ratio (with 95% confidence intervals), likelihood ratio test P-value, and number of data values, for various predictive factors in the EUROPE set for full period and 5 years follow-up period (all observations after 5 years are censored at 5 years). *HOTAIR*-DNAm-multivariate denotes multivariate analysis adjusted for stage and size of residual tumor.

† *HOTAIR* DNAm correlation score was used (not the binarised score).

§ *HOTAIR* DNAm correlation score was binarised into high and low groups according to a cut-off value as described in Supplementary Methods.

| Factor                                           | Full period      |                  |     | <5 yrs           |                  |     |
|--------------------------------------------------|------------------|------------------|-----|------------------|------------------|-----|
|                                                  | HR (95%CI)       | P                | n   | HR (95%CI)       | P                | n   |
| Age                                              | 1.10 (0.90-1.33) | 0.35             | 121 | 1.08 (0.86-1.34) | 0.51             | 121 |
| Stage                                            | 1.50 (1.19-1.89) | <b>&lt;0.001</b> | 121 | 1.61 (1.24-2.10) | <b>&lt;0.001</b> | 121 |
| Grade                                            | 1.22 (0.96-1.55) | 0.097            | 121 | 1.25 (0.96-1.64) | 0.095            | 121 |
| Residual Tumor                                   | 1.28 (1.04-1.57) | <b>0.016</b>     | 121 | 1.21 (0.96-1.52) | 0.097            | 121 |
| <i>HOTAIR</i> -DNAm <sup>†</sup>                 | 1.16 (0.94-1.43) | 0.15             | 121 | 1.13 (0.90-1.42) | 0.31             | 121 |
| <i>HOTAIR</i> -DNAm <sup>§</sup>                 | 1.74 (1.11-2.73) | <b>0.01</b>      | 121 | 1.98 (1.20-3.26) | <b>0.008</b>     | 121 |
| <i>HOTAIR</i> -DNAm <sup>†</sup><br>multivariate | 1.16 (0.94-1.44) | 0.17             | 121 | 1.19 (0.94-1.51) | 0.14             | 121 |
| <i>HOTAIR</i> -DNAm <sup>§</sup><br>multivariate | 1.63 (1.04-2.56) | <b>0.03</b>      | 121 | 1.86 (1.12-3.07) | <b>0.01</b>      | 121 |

**Additional data file 18B. DNAm signature in the Cisplatin treated “EUROPE” set (n=85).** Cox regression Hazard ratio (with 95% confidence intervals), likelihood ratio test P-value, and number of data values, for various predictive factors in the EUROPE set for full period and 5 years follow-up period (all observations after 5 years are censored at 5 years). *HOTAIR*-DNAm-multivariate denotes multivariate analysis adjusted for stage and size of residual tumor. We note that the *HOTAIR* DNAm correlation score was used, not the binarised score.

† *HOTAIR* DNAm correlation score was used (not the binarised score).

§ *HOTAIR* DNAm correlation score was binarised into high and low groups according to a cut-off value as described in Supplementary Methods.

| Factor                                           | Full period      |                  |    | <5 yrs           |                  |    |
|--------------------------------------------------|------------------|------------------|----|------------------|------------------|----|
|                                                  | HR (95%CI)       | P                | n  | HR (95%CI)       | P                | n  |
| Age                                              | 1.34 (1.03-1.74) | 0.29             | 85 | 1.30 (0.98-1.72) | 0.063            | 85 |
| Stage                                            | 2.29 (1.60-3.27) | <b>&lt;0.001</b> | 85 | 2.18 (1.51-3.14) | <b>&lt;0.001</b> | 85 |
| Grade                                            | 1.05 (0.82-1.34) | 0.72             | 85 | 0.99 (0.76-1.30) | 0.97             | 85 |
| Residual Tumor                                   | 1.75 (1.32-2.30) | <b>&lt;0.001</b> | 85 | 1.76 (1.31-2.36) | <b>&lt;0.001</b> | 85 |
| <i>HOTAIR</i> -DNAm <sup>†</sup>                 | 0.85 (0.65-1.10) | 0.22             | 85 | 0.93 (0.70-1.23) | 0.62             | 85 |
| <i>HOTAIR</i> -DNAm <sup>§</sup>                 | 0.80 (0.48-1.35) | 0.41             | 85 | 0.91 (0.52-1.58) | 0.73             | 85 |
| <i>HOTAIR</i> -DNAm <sup>†</sup><br>multivariate | 0.90 (0.69-1.18) | 0.17             | 85 | 0.98 (0.73-1.30) | 0.88             | 85 |
| <i>HOTAIR</i> -DNAm <sup>§</sup><br>multivariate | 0.80 (0.47-1.35) | 0.40             | 84 | 0.90 (0.51-1.58) | 0.72             | 85 |
