# Supplementary material for: HOTAIR and its surrogate DNA methylation signature indicate carboplatin resistance in ovarian cancer
Source: Springer Nature journal article supplement (doi:10.1186/s13073-015-0233-4), 2015-10-24
Supplement: MOESM19 [file 13073_2015_233_MOESM19_ESM.pdf]

**Additional data file 19. DNAm signature in the Carboplatin treated set from “ROCHESTER-MAYO” (n=174).** Cox regression Hazard ratio (with 95% confidence intervals), likelihood ratio test P-value, and number of data values, for various predictive factors in the MAYO set for full period and 5 years follow-up period (all observations after 5 years are censored at 5 years). *HOTAIR*-DNAm-multivariate denotes multivariate analysis adjusted for stage and size of residual tumor.

† *HOTAIR* DNAm correlation score was used (not the binarised score).

§ *HOTAIR* DNAm correlation score was binarised into high and low groups according to a cut-off value as described in Supplementary Methods.

| Factor                                           | Full period      |              |     | <5 yrs           |              |     |
|--------------------------------------------------|------------------|--------------|-----|------------------|--------------|-----|
|                                                  | HR (95%CI)       | P            | n   | HR (95%CI)       | P            | n   |
| Age                                              | 1.21 (1.00-1.46) | 0.05         | 174 | 1.21 (0.98-1.49) | 0.08         | 174 |
| Stage                                            | 1.53 (1.08-2.15) | <b>0.02</b>  | 174 | 1.62 (1.11-2.38) | <b>0.01</b>  | 174 |
| Grade                                            | 1.04 (0.76-1.41) | 0.81         | 169 | 1.17 (0.82-1.66) | 0.39         | 169 |
| Residual Tumor                                   | 1.34 (1.12-1.60) | <b>0.001</b> | 136 | 1.33 (1.09-1.63) | <b>0.004</b> | 136 |
| <i>HOTAIR</i> -DNAm <sup>†</sup>                 | 1.09 (0.91-1.32) | 0.22         | 174 | 1.18 (0.95-1.45) | 0.13         | 174 |
| <i>HOTAIR</i> -DNAm <sup>§</sup>                 | 1.03 (0.70-1.52) | 0.87         | 174 | 1.19 (0.77-1.85) | 0.44         | 174 |
| <i>HOTAIR</i> -DNAm <sup>†</sup><br>multivariate | 1.31 (1.03-1.66) | <b>0.03</b>  | 136 | 1.45 (1.12-1.88) | <b>0.004</b> | 136 |
| <i>HOTAIR</i> -DNAm <sup>§</sup><br>multivariate | 1.31 (0.83-2.07) | 0.23         | 136 | 1.57 (0.95-2.60) | <b>0.076</b> | 136 |
