# Supplementary material for: HOTAIR and its surrogate DNA methylation signature indicate carboplatin resistance in ovarian cancer
Source: Springer Nature journal article supplement (doi:10.1186/s13073-015-0233-4), 2015-10-24

**(A)** *HOTAIR* expression

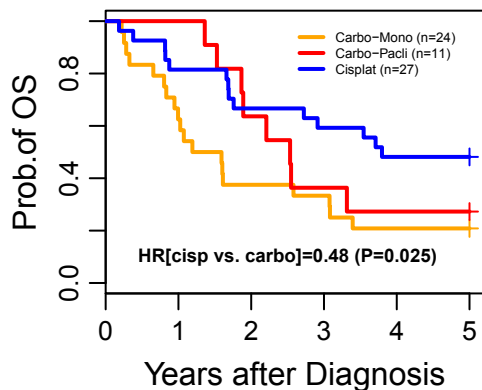

**(B)** NO *HOTAIR* expression

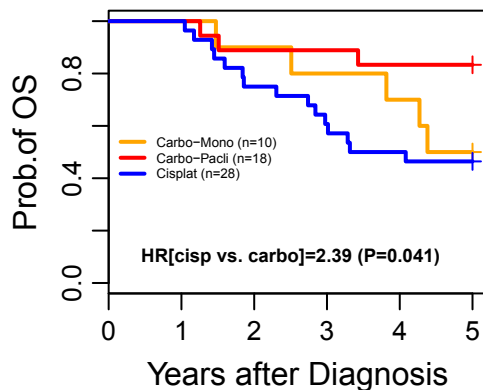

**(C)** *HOTAIR* expression

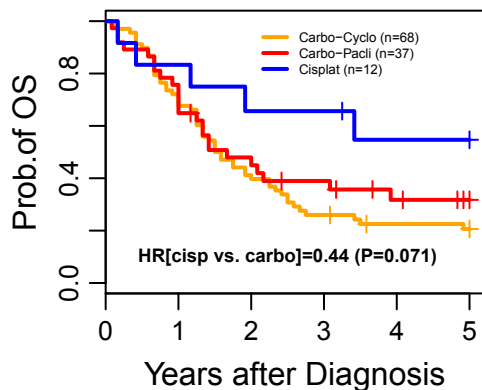

**(D)** NO *HOTAIR* expression

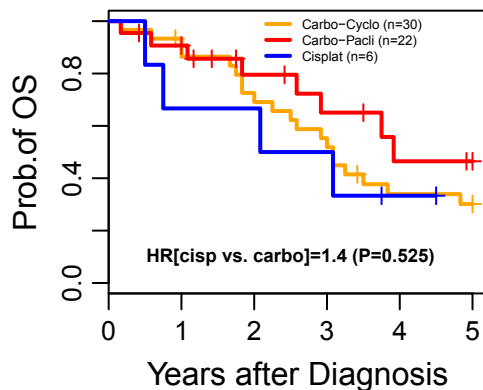

Supplement: MOESM20 [file 13073_2015_233_MOESM20_ESM.pdf]
